# Supplementary material
Source: publisher figshare collection journal article supplement (https://acs.figshare.com/ndownloader/files/9524593)
Supplement: Supplementary file 1 [file 9524593]

## Sheet: Contents
SUPPORTING INFORMATION -- TABLES
Contents
Table S-1:	Mass Differences Used in Building the G-PTM-D Database
Table S-2:	Complete List of 2244 Aggregated Experimental Proteoforms
Table S-3:	Theoretical Proteoforms Derived from the E. coli UniProt XML Database
Table S-4:	Complete List of ET and EE Mass Differences
Table S-5:	Selected ET and EE Mass Differences with FDR Test Results
Table S-6:	Proteoform Families Assembled in the Analysis with UniProt Database
Table S-7:	Experimental Proteoforms Identified from ET connections (UniProt)
Table S-8:	PTMs of Newly Added Modified Peptides in the G-PTM-D Database
Table S-9:	Theoretical Proteoforms Derived from the E. coli G-PTM-D Database
Table S-10:	Proteoform Families Assembled in the Analysis with G-PTM-D Database
Table S-11:	Associated Gene Names of Families (Identified and Ambiguous)
Table S-12:	Experimental Proteoforms Identified from ET Connections (G-PTM-D)

## Sheet: T S-1
SI Table S-1	Mass Difference List Used in Building the G-PTM-D Database
Mass Difference (Da)	Corresponding PTM
-33.9877	dehydroalanine from cysteine
-32.0085	oxidation and then loss of oxidized M side chain
-30.0106	pyrrolidinone
-18.0106	water loss
-17.0265	ammonia loss
0.984	deamidation
3.9949	oxidation of W to kynurenine
12	carbon
13.9793	oroline oxidation to pyroglutamic acid,
13.9793	tryptophan oxidation to oxolactone
14.0157	methylation
15.9949	Oxidation
19.9898	tryptophan oxidation to hydroxykynurenin
21.9819	sodium
26.0157	acetaldehyde
27.9949	formylation
28.0313	dimethylation
31.9898	dioxidation
37.9469	calcium
42.0106	acetyllysine
42.047	trimethylation
43.0058	carbamylation
47.9847	trioxidation of C
52.9115	Fe[III]
53.9193	Fe[II]
57.0215	Carbamidomethylation (CAM)
58.0055	carboxymethyl
61.9135	zinc
79.9568	sulfonation
79.9663	phosphorylation
114.043	GG of K
128.095	lysine not cleaved
156.101	arginine not cleaved
204.188	farnesylation
210.198	myristoylation
238.23	palmitoylation
266.152	lauryl sulfuric acid
294.183	CHDH fatty acid

## Sheet: T S-2
SI Table S-2	Complete List of 2,244 Aggregated Experimental Proteoforms
Experimental ID	Aggregated Mass (Da)	Aggregated Intensity	Aggregated RT	Observation Count	Lysine Count
E0	9224.04	4.92094e+10	55.47	240	4
E1	8995.94	4.88572e+10	50.59	611	5
E2	6346.78	1.02003e+10	45.69	278	11
E3	11306.5	5.33526e+10	50.26	238	16
E4	9616.36	1.31933e+10	59	96	11
E5	8982.97	4.39137e+10	49.31	303	7
E6	7316.09	2.14559e+10	56.34	202	5
E7	8492.84	3.24968e+10	46.41	402	9
E8	10396.9	4.80108e+10	51.71	357	13
E9	7383.9	2.01408e+10	56.65	206	6
E10	9292.14	1.5359e+10	61.71	133	9
E11	9132.03	1.65157e+10	46.87	158	11
E12	13081.3	2.43613e+10	53.54	204	11
E13	12834.1	4.2025e+10	56.61	249	9
E14	11586.4	1.95696e+10	48.97	194	11
E15	12260.7	6.83894e+09	73.04	113	13
E16	12323	8.46895e+09	55.04	88	13
E17	10412.9	2.44787e+10	51.13	416	13
E18	14140.7	7.64938e+09	58.99	83	12
E19	10774.9	1.18888e+10	53.83	140	11
E20	9761.45	1.04092e+10	53.23	152	10
E21	10179.6	1.3599e+10	52.83	260	6
E22	17599.5	1.08758e+10	59.23	124	12
E23	15552.2	8.36135e+09	59.76	109	12
E24	6359.49	5.39566e+09	44.62	363	6
E25	6445.69	9.10832e+09	52.03	229	5
E26	17722.6	4.23585e+09	66.02	180	12
E27	14795.2	1.20306e+10	58.07	172	10
E28	13097.3	1.03152e+10	53.47	192	11
E29	18946.4	8.01221e+09	59.28	90	16
E30	10444.7	5.64872e+09	57.41	105	8
E31	9658.72	2.62447e+09	48.5	28	8
E32	14155.7	6.20777e+09	58.67	125	12
E33	9717.6	6.98785e+09	50.43	114	13
E34	10790.9	1.18996e+10	53.3	320	11
E35	9659.51	1.70516e+09	48.99	31	13
E36	11602.4	1.55099e+10	48.72	277	11
E37	9240.03	1.05326e+10	55.51	180	5
E38	10195.6	8.1547e+09	52.49	235	6
E39	17615.5	8.31827e+09	58.74	141	12
E40	7321.84	1.36683e+09	55.88	37	3
E41	15846.7	1.07168e+10	60.61	185	11
E42	12339	8.62593e+09	54.94	131	13
E43	8158.12	4.41251e+09	47.36	75	8
E44	10408.9	4.5764e+09	51.95	49	13
E45	13849.5	4.25188e+09	53.18	78	9
E46	9657.83	5.10866e+08	48.23	5	5
E47	7333.08	6.82492e+09	55.97	301	6
E48	9674.7	1.2949e+09	47.93	37	8
E49	11304.4	2.13305e+09	56.86	31	14
E50	12302.7	2.76632e+09	75.57	206	13
E51	16120.8	9.40868e+08	54.53	14	14
E52	16119.9	5.13341e+08	54.63	3	11
E53	14476.8	4.10444e+09	54.15	80	8
E54	14811.1	9.75502e+09	57.34	284	10
E55	13104.4	5.61436e+09	58.09	130	11
E56	6358.77	1.9232e+09	46.05	72	12
E57	9645.39	5.14977e+09	54.09	135	10
E58	15294.1	2.2356e+09	62.07	59	11
E59	11059.6	2.29296e+09	64.67	46	2
E60	14981.2	2.74929e+09	61.36	37	15
E61	6374.48	5.52002e+09	44.52	388	5
E62	9322	1.89697e+09	55.26	37	5
E63	5416.17	9.44684e+08	26.87	91	5
E64	14893.1	2.79577e+09	57.24	50	10
E65	13906.5	3.68916e+09	52.28	120	9
E66	6375.49	6.20104e+08	31.55	32	6
E67	15075.5	6.19142e+09	59.31	116	13
E68	9632.36	1.34554e+09	58.99	60	11
E69	15770.2	8.51202e+08	60.79	6	12
E70	12274.7	9.80094e+09	73.43	309	13
E71	14492.8	3.06372e+09	54.25	105	8
E72	13860.7	2.36087e+09	46.98	99	13
E73	11637.4	2.18825e+09	55.7	78	10
E74	12850.1	1.04947e+10	56.76	210	9
E75	15256.2	6.29798e+08	62.06	6	15
E76	12932.1	3.69756e+09	56.63	55	9
E77	11306.5	5.80387e+08	33.72	4	16
E78	17738.6	3.05531e+09	65.31	149	12
E79	7323.95	2.10441e+08	55.81	4	4
E80	11296.1	2.03006e+09	61.97	67	10
E81	8174.12	1.99721e+09	47.21	80	8
E82	6359.49	1.31549e+09	32.33	35	6
E83	8649.85	2.20456e+09	65.28	155	7
E84	15862.7	2.35655e+09	60.58	101	11
E85	15445.7	3.42357e+09	60.97	98	16
E86	15074.6	1.76633e+08	57.96	1	10
E87	13790.5	3.21988e+09	52.17	113	9
E88	11303.6	2.46072e+08	57.25	8	10
E89	5028.06	1.73401e+08	58.65	1	22
E90	11021	9.32024e+08	57.81	15	7
E91	8152.36	1.64032e+09	54.71	77	5
E92	8971.91	2.78067e+09	52.09	117	6
E93	6461.68	4.14798e+09	49.86	516	5
E94	15418.9	9.124e+08	66.77	41	3
E95	9781.4	2.29051e+09	52.93	112	9
E96	8434.82	2.37258e+09	47.33	86	9
E97	8042.07	1.77529e+09	47.59	153	8
E98	13120.4	4.26914e+09	57.77	174	11
E99	7222.93	8.3885e+09	94.15	1145	5
E100	11618.4	4.49154e+09	48.64	223	11
E101	12355	2.63298e+09	55.02	101	13
E102	15461.7	2.86807e+09	60.87	101	16
E103	7206.95	1.13019e+10	94.31	875	4
E104	11356.1	2.67621e+09	50.76	102	7
E105	14992.1	7.06376e+08	56.64	12	10
E106	13202.4	1.5438e+09	57.67	28	11
E107	10277.5	1.44628e+09	53	127	6
E108	16136.8	9.33416e+08	54.36	37	14
E109	24766.7	4.59921e+08	61.68	14	20
E110	13081.3	3.68099e+08	34.2	3	11
E111	17631.5	3.1642e+09	58.39	116	12
E112	9743.36	6.28465e+08	54.17	13	10
E113	15091.6	2.4858e+09	59.29	96	12
E114	10872.9	4.70639e+08	53.92	14	11
E115	15059.2	1.9308e+09	61.08	65	15
E116	11767.5	2.58336e+09	57.87	101	4
E117	11289.5	2.54291e+09	49.91	121	16
E118	6621.81	4.6177e+08	27.69	294	8
E119	10708.7	1.10797e+09	58.54	36	8
E120	4472.56	1.05648e+09	44.67	400	7
E121	11303.7	2.00116e+08	56.39	5	7
E122	10425.9	4.58166e+09	50.61	295	13
E123	14419.8	5.03603e+08	53.74	9	8
E124	9308.14	5.19403e+08	61.59	44	9
E125	10806.9	3.4531e+09	52.96	260	11
E126	10127.8	5.28819e+08	57.51	17	13
E127	22396.2	7.28277e+08	56.59	18	19
E128	24783.7	7.25703e+08	61.58	22	21
E129	8179.09	4.47307e+08	47.74	30	8
E130	17581.5	1.27576e+09	59.42	49	11
E131	4472.62	3.14638e+08	30.09	7	7
E132	22412.2	7.8631e+08	56.45	35	19
E133	14991.9	6.8238e+08	60.89	21	8
E134	12290.7	3.00646e+09	72.56	433	13
E135	8504.85	1.24883e+09	46.57	94	8
E136	14171.7	1.35027e+09	58.31	81	12
E137	13593.3	1.39934e+09	65	65	8
E138	15568.2	1.56573e+09	59.65	80	12
E139	9675.51	8.0891e+08	48.55	60	13
E140	10068.4	7.89237e+08	61.93	32	6
E141	15173.5	7.46095e+08	58.36	15	13
E142	9115.01	1.43189e+09	46.91	86	11
E143	6931.22	2.01615e+08	51.19	3	10
E144	15007.8	8.68343e+08	60.62	33	8
E145	11653.4	9.52414e+08	55.46	66	10
E146	15429.7	1.08415e+09	60.83	39	16
E147	8987.9	1.4506e+09	52.44	76	6
E148	8727.79	6.21982e+08	50.61	23	6
E149	13115.6	1.23896e+09	52.31	63	8
E150	9859.41	2.72077e+08	53.54	4	10
E151	10412.9	2.54671e+08	33.8	3	13
E152	9077.87	1.46051e+09	51	154	6
E153	20343	3.09722e+08	61.82	11	17
E154	12568.9	5.94018e+08	75.59	38	13
E155	15495.2	3.55614e+08	60.53	13	12
E156	6941.89	1.75056e+08	50.84	4	10
E157	13918.7	1.79148e+08	46.67	4	12
E158	10460.7	1.26224e+09	57	97	8
E159	10396.9	2.18333e+08	33.91	3	13
E160	14508.8	5.53591e+08	54.43	51	8
E161	13469.9	5.49233e+08	63.22	86	14
E162	13218.4	5.58536e+08	57.5	18	11
E163	11305	7.89709e+07	54.23	1	25
E164	9338	2.84677e+08	54.93	9	5
E165	13864.5	6.72113e+08	52.41	45	9
E166	15310.1	5.31807e+08	61.28	47	11
E167	13733.7	7.43277e+08	54.27	32	11
E168	5416.15	2.33318e+08	43.82	179	5
E169	10375.5	3.0819e+08	53.1	11	6
E170	15075.2	1.34741e+09	60.63	74	15
E171	12948	9.62455e+08	56.53	26	9
E172	14997.2	6.11032e+08	60.83	21	14
E173	8996.95	2.01424e+08	33.91	4	6
E174	11783.5	7.33805e+08	57.8	82	4
E175	13300.4	2.66923e+08	57.07	11	11
E176	18928.4	7.96441e+08	59.35	41	16
E177	15089.1	2.38568e+08	56.67	8	10
E178	20003.9	2.53451e+08	62.25	17	12
E179	14909.1	3.33968e+08	56.84	11	10
E180	9304.14	2.22185e+08	63.06	18	9
E181	10914.2	5.15959e+08	58.35	22	10
E182	10379.9	8.49985e+08	51.83	73	13
E184	5501.88	5.78746e+08	48.3	97	6
E185	20359	1.98881e+08	61.89	9	17
E186	15477.7	1.19756e+09	60.8	72	16
E187	10888.9	3.56967e+08	53.33	15	11
E188	11372.1	9.01228e+08	50.29	79	7
E189	18962.4	4.26424e+08	56.86	46	16
E190	20002.9	6.504e+07	61.77	1	7
E191	11075.6	2.59146e+08	62.68	36	2
E192	15711.3	5.58921e+08	62.84	40	12
E193	8657.79	1.37113e+09	47.36	119	9
E194	13803.7	4.08648e+08	47.05	19	13
E195	17663.5	3.02926e+08	57.28	15	12
E196	8190.12	3.06429e+08	47.04	23	8
E197	19987.9	3.48273e+08	62.14	17	13
E198	7366.88	8.29129e+08	56.69	59	7
E199	6621.79	4.25067e+08	43.71	208	8
E200	22217.2	3.16959e+08	67.61	17	18
E201	8215.61	1.2368e+08	54.68	6	10
E202	9628.36	1.80721e+08	60.13	7	11
E203	16152.8	2.43233e+08	53.81	17	13
E204	5448.14	4.88086e+08	43.55	386	4
E205	17647.5	6.22208e+08	58.09	38	12
E206	10260.5	9.5689e+08	52.84	94	6
E207	9208.02	8.89053e+08	55.45	56	5
E208	11288.9	7.40714e+08	66.63	46	7
E209	11402.4	7.56544e+07	56.94	3	14
E210	11333.2	7.311e+08	63.09	55	8
E211	13975.7	2.98154e+08	46.76	30	13
E212	10179.6	1.57057e+08	34.06	3	7
E213	8755.83	9.12056e+07	54.38	5	9
E214	22233.2	5.31235e+08	67.53	51	18
E215	11319.6	1.65082e+08	56.65	10	10
E216	5803.07	2.55106e+08	44.52	96	4
E217	8168.36	9.5148e+08	53.87	136	5
E218	8195.08	3.16082e+08	47.6	27	8
E219	9674.6	1.9129e+08	48.35	8	10
E220	19811.9	3.34424e+08	69.69	22	12
E221	12835	2.29959e+08	75.61	22	13
E222	9017.9	5.5314e+08	51.48	76	6
E223	9089.89	2.7528e+08	51.72	26	6
E224	11335.6	1.37066e+08	56.26	11	9
E225	12914	1.25927e+09	56.5	60	9
E226	15272.2	2.09652e+08	61.42	8	15
E227	8513.8	5.05165e+08	47.12	48	9
E228	13030	3.3395e+08	56.16	10	9
E229	7415.05	4.32701e+08	56.15	20	6
E230	9146.05	4.75063e+08	46.87	41	10
E231	13136.4	5.91667e+08	57.07	67	11
E232	5432.15	4.66404e+08	43.78	357	5
E233	15038.3	3.17408e+08	59.91	11	15
E234	9152.99	6.17917e+08	47.2	48	11
E235	7238.92	2.49254e+09	93.71	995	5
E236	10773.9	1.4189e+08	34.2	4	10
E237	4493.52	5.00605e+08	45.03	268	7
E238	8590.81	1.13618e+09	46.41	130	9
E239	15204.2	4.21749e+08	61.55	23	15
E240	14237.7	3.68043e+08	58.82	17	12
E241	8983	1.37152e+08	33.67	3	7
E242	9691.48	2.02269e+08	47.86	54	14
E243	13097.3	1.22431e+08	34.09	4	11
E244	16135.9	1.64093e+08	54.91	8	9
E245	11320.4	2.77004e+08	56.62	25	15
E246	12817	2.29531e+08	56.08	18	9
E247	17679.5	1.92181e+08	56.44	11	12
E248	6942.56	9.24309e+07	51.38	6	10
E249	5432.15	4.4859e+08	27.97	456	5
E250	16210.8	3.08856e+08	71.03	31	7
E251	9777.43	3.56855e+08	51.64	40	10
E252	15573.2	7.74199e+08	60.57	33	12
E253	8058.07	9.53813e+08	47.38	123	8
E254	14828.1	1.18419e+09	56.98	120	10
E255	11404.5	7.90815e+08	50.68	79	16
E256	15091.2	3.20904e+08	60.19	40	14
E257	8573.77	7.98492e+08	46.37	97	9
E258	7481.85	1.54963e+08	56.61	6	7
E259	9123	6.82457e+08	47.19	47	11
E260	15107.5	2.47608e+08	59.5	34	13
E261	9601.34	2.82524e+08	59.03	25	11
E262	6455.46	3.31946e+08	44.49	99	6
E263	8226.63	1.23728e+08	54.68	6	9
E264	14435.8	3.99882e+08	53.62	18	8
E265	12897.1	1.70385e+08	55.05	5	9
E266	9011.95	3.36883e+08	51.17	34	5
E267	13469.7	7.37208e+07	63.32	8	17
E268	14451.8	1.77055e+08	54.47	10	8
E269	15369.6	1.58206e+08	60	10	5
E271	9063.9	1.17144e+09	49.38	129	7
E272	8957.93	3.71657e+08	49.96	41	7
E273	5242.87	1.357e+09	51.69	154	6
E274	26019.5	7.17049e+07	55.96	4	22
E275	13162.3	4.24263e+08	53.67	32	11
E276	9093.01	2.40205e+08	54.97	11	5
E277	15023.8	2.7589e+08	60.39	18	7
E279	13922.5	3.69533e+08	51.12	57	9
E280	10124.7	2.21227e+08	51.99	11	11
E281	9661.38	3.73594e+08	52.46	45	10
E282	7399.89	1.41954e+08	56.45	15	7
E283	9714.33	1.26885e+08	58.61	10	11
E284	13750.7	2.79824e+08	54.05	16	10
E285	10494.8	3.53337e+08	52.08	35	13
E286	9797.39	4.99773e+08	53.71	37	10
E287	8966.93	1.83171e+08	50.24	27	6
E288	13744.6	1.38486e+08	47.17	9	13
E289	9841.33	1.00591e+08	54.13	4	10
E290	11667.3	3.72051e+08	50.12	40	11
E291	9690.63	3.4218e+08	47.52	33	10
E292	13469.1	4.46038e+07	62.77	4	7
E293	6346.81	1.08024e+08	33.28	8	11
E294	17754.6	7.69456e+08	64.7	95	12
E295	9740.43	1.45408e+08	48.83	19	14
E296	9673.84	3.75225e+07	47.93	2	5
E298	14443.8	5.77684e+07	53.58	3	8
E299	6471.45	3.90055e+08	44.4	114	6
E300	12318.7	6.13383e+08	71.92	95	13
E301	12420.9	8.49558e+07	55.38	5	13
E302	11602.4	9.5701e+07	33.65	3	11
E304	11586.4	8.64464e+07	33.64	3	11
E305	6341.48	3.21846e+08	44.53	91	6
E306	6446.7	8.95227e+07	34.07	3	5
E307	9162.89	1.65492e+08	52.46	9	6
E308	11304.9	5.14502e+08	66.38	60	7
E309	13806.5	4.05336e+08	51.19	56	9
E310	14253.7	1.68625e+08	58.58	7	12
E311	6890.7	1.06803e+08	51.93	18	3
E312	6371.77	1.15429e+08	46.22	33	12
E313	12436.9	1.07227e+08	55.25	7	14
E314	9691.34	7.83532e+07	47.36	10	17
E315	6875.71	8.67091e+07	53.13	10	3
E316	9090	1.73189e+08	46.98	17	11
E317	9675.37	5.7809e+07	48.87	8	17
E318	15220.2	1.26512e+08	60.93	7	15
E319	13322.4	6.52064e+07	57.56	3	11
E320	10510.8	2.85946e+08	51.53	44	13
E321	19984.9	3.2049e+07	62.03	1	3
E323	13101.2	1.26341e+08	75.51	14	13
E324	8482.82	2.32675e+08	46.48	66	9
E325	9107	2.41059e+08	47.21	33	11
E326	10161.5	3.84014e+08	52.77	58	6
E327	7349.08	6.63193e+08	55.12	125	6
E328	26035.6	7.6329e+07	55.87	4	19
E329	15536.2	1.65518e+08	59.37	11	12
E330	9276.11	2.76569e+08	61.63	39	10
E331	7415.89	1.0627e+08	56.44	15	7
E332	8448.81	2.16873e+08	46.53	45	9
E333	5803.1	5.7252e+07	30.57	3	4
E334	10756.9	1.48948e+08	53.51	10	11
E336	15527.2	3.30187e+08	59.68	26	11
E337	10789.9	6.69979e+07	34.09	3	10
E338	9236.04	2.8627e+07	55.96	1	5
E340	17705.5	1.50961e+08	65.84	19	11
E341	4488.56	7.77777e+08	44.26	352	7
E342	15802.4	3.46227e+07	56.42	2	15
E343	15093.9	2.79711e+08	71.1	50	10
E344	10195.6	7.51418e+07	33.94	3	6
E345	9094.89	4.41696e+08	51.3	58	6
E346	10713.6	1.49649e+08	51.73	9	9
E347	15786.2	7.00766e+07	60.36	5	12
E348	4533.66	1.39491e+08	45.31	107	9
E349	15650.2	9.96339e+07	59.81	10	12
E350	8261.56	8.81103e+07	50.44	5	6
E351	14081.7	1.27204e+08	59.37	7	11
E352	8250.33	1.16433e+08	54.71	12	5
E353	14232.7	5.40082e+07	59.36	5	11
E354	4909.87	1.01776e+09	51.6	221	7
E355	23540.9	7.71092e+07	55.32	8	20
E356	15353.6	7.52513e+07	60.06	5	5
E357	8430.58	8.68462e+07	47.45	5	7
E358	9304.97	1.8494e+08	55.99	15	5
E359	11311.1	1.22253e+08	61.1	19	10
E360	5258.86	4.00357e+08	51.33	84	6
E361	9003.92	2.31711e+08	50.07	20	7
E362	15493.7	2.44426e+08	60.66	30	15
E363	11500.4	2.4715e+07	56.3	1	14
E364	22249.2	3.6083e+08	67.36	47	19
E365	8688.76	1.65286e+08	46.23	15	9
E366	5761.39	2.14526e+08	45.82	47	10
E367	13859.6	2.43122e+07	46.76	1	17
E368	5104.76	1.73266e+08	44.83	80	4
E369	8132.09	9.97309e+07	47.49	11	8
E370	19474.3	1.29087e+08	61.55	10	10
E371	6477.69	7.10753e+07	33.53	3	5
E372	5028.67	2.41642e+07	58.65	1	23
E374	13179.3	3.12756e+08	54.07	34	11
E375	11319.7	6.27421e+07	56.35	5	7
E376	4550.35	2.20286e+08	44.85	94	2
E377	5473.98	3.92543e+08	50.03	62	6
E378	10293.5	2.7695e+08	53.2	41	6
E379	13064.3	1.14157e+08	53.22	11	11
E380	8665.85	2.73981e+08	64.38	77	7
E381	24799.7	1.08314e+08	61.86	9	22
E382	10429.9	2.31871e+07	50.46	2	13
E383	11562.4	1.85695e+08	49.56	28	12
E385	6477.68	5.65221e+08	48.35	266	5
E386	9240.1	2.23084e+07	46.37	1	10
E387	11112.6	2.21515e+07	64.43	1	2
E388	8467.83	3.7111e+08	46.33	99	9
E389	13125.4	1.89653e+08	58.73	18	11
E390	8585.8	8.3312e+07	47.14	21	9
E391	23556.9	3.08144e+07	54.98	6	19
E392	13831.5	1.01627e+08	53.2	9	9
E393	9756.44	1.10517e+08	48.96	26	14
E394	9676.24	4.12606e+07	47.72	7	21
E395	4488.62	7.74097e+07	29.58	7	7
E396	4527.47	9.8738e+07	45.17	57	7
E397	17742.6	1.0755e+08	66.22	25	11
E398	10715.9	4.11636e+07	55.76	2	8
E399	7303.84	5.03828e+07	55.59	3	3
E401	7237.14	9.62896e+07	95.67	77	23
E402	10855.8	2.07519e+07	53.57	1	11
E403	11321.2	3.1425e+07	55.98	2	22
E404	11280	1.03119e+08	53.05	8	11
E405	22444.2	5.08712e+07	55.98	5	19
E406	8491.88	9.27424e+07	33.41	7	8
E407	9226	1.69165e+08	47.15	43	11
E408	10758.5	1.98684e+07	54.23	1	9
E409	10427.7	7.49407e+07	57.36	6	8
E410	11634.4	1.74236e+08	48.27	48	11
E411	11528.4	1.78924e+08	49.61	19	11
E412	13142.4	2.10764e+08	58.53	26	11
E413	5040.91	4.50936e+08	51.6	126	7
E414	10288.6	1.93535e+07	59.19	1	10
E415	11716.4	1.16936e+08	49	15	11
E416	4566.35	196753133	44.76	94	2
E417	20019.9	5.95502e+07	62.34	13	13
E418	15177.2	1.92921e+08	61.26	27	15
E419	22428.2	1.59498e+08	56.41	20	19
E420	11417.7	1.89625e+07	56.04	1	6
E421	6587.54	1.11401e+08	54.97	14	7
E422	9132.05	4.70834e+07	33.37	3	11
E423	11577.4	1.1182e+08	49.76	30	11
E424	13420.3	3.1755e+07	57.55	3	11
E425	9690.74	6.6897e+07	47.72	10	6
E426	11618.5	9.8907e+07	51.47	8	16
E427	7250.62	2.01489e+07	46.9	3	7
E428	14628.8	2.31754e+08	96.55	74	6
E429	6182.52	4.44514e+07	27.36	52	7
E431	7754.49	1.10028e+08	62.55	23	6
E432	7431.05	9.50467e+07	55.35	10	6
E433	13888.5	5.78614e+07	52.21	13	9
E436	15596.1	2.44901e+07	61.6	2	11
E437	5832.52	1.4374e+08	49.87	32	10
E438	4604.61	1.19993e+08	43.82	164	7
E439	5512.13	3.87645e+07	43.66	83	5
E440	13195.3	9.56967e+07	53.48	10	11
E441	15188.1	2.49912e+07	56.45	2	11
E442	15386.6	2.08163e+07	60.05	4	6
E443	19802.3	4.14229e+07	63.61	3	15
E444	6717.77	7.89583e+07	43.58	69	8
E445	15054.2	3.84052e+07	59.7	3	15
E446	16120.6	2.63825e+07	55.41	3	17
E447	8149.1	3.46052e+07	47.51	7	9
E448	9099.99	5.61182e+07	47.07	10	11
E449	8476.81	2.4845e+07	46.21	6	9
E450	12123.3	4.27491e+07	59.39	3	8
E451	9229.97	8.5359e+07	46.7	9	11
E452	11336.4	7.73267e+07	56.92	9	14
E453	13021	5.40705e+07	52.41	5	7
E454	11601.4	1.60889e+07	48.5	1	2
E455	8953.89	8.80515e+07	52.09	14	6
E456	14161.7	1.1037e+08	59.6	16	12
E457	12890	4.27646e+07	59.55	8	15
E458	22264.2	1.05115e+08	67.05	23	17
E459	5448.15	3.94432e+08	27.86	613	5
E460	8063.03	1.19706e+08	48.33	50	8
E461	15193.2	8.26909e+07	60.73	12	15
E462	10476.7	1.06557e+08	57.07	29	8
E463	7323.71	1.57886e+07	56.13	1	10
E464	20035.9	31258725	61.79	3	13
E465	17697.6	5.97997e+07	66.15	13	12
E466	13093.4	1.03374e+08	56.49	20	11
E467	15854.2	2.90537e+07	58.96	2	12
E468	15013.2	5.69912e+07	60.03	5	15
E469	9704.43	8.55441e+07	53.21	15	10
E470	14151.7	2.77572e+07	59.03	2	11
E471	9736.42	7.59822e+07	53.77	14	11
E472	9714.43	8.80023e+07	59.61	17	11
E473	14644.8	1.34023e+08	96.18	48	7
E474	13399.3	2.38672e+07	56.98	2	11
E475	16136.8	1.52686e+07	34.46	1	13
E476	13773.4	3.31447e+07	51.86	4	10
E477	19686.3	7.98452e+07	63.89	13	16
E478	14843.1	6.67985e+07	55.88	15	9
E479	15767.7	1.04487e+08	76.25	43	12
E480	4588.62	9.90967e+07	44.16	151	7
E481	13058.5	2.97841e+07	51.9	2	8
E482	9757.32	2.27753e+07	50.55	2	17
E483	12371	2.44377e+08	55.13	39	13
E484	20051	1.98754e+07	61.11	3	10
E485	15929.2	4.09558e+07	64.49	3	12
E486	9772.61	3.37759e+07	48.82	5	9
E487	13470.6	2.41715e+07	62.42	3	22
E488	9320.14	4.7026e+07	63.08	10	9
E489	6391.47	1.14831e+08	32.21	21	6
E490	16120.8	1.64621e+07	34.25	2	14
E491	6444.84	7.12577e+07	46.03	46	12
E492	10537.6	1.45858e+07	52.63	1	6
E493	15718.2	5.76697e+07	60.48	8	12
E494	11799.5	1.07799e+08	56.6	31	5
E495	6407.47	2.91833e+07	44.43	20	6
E496	15509.7	2.89455e+07	59.13	6	17
E497	6407.48	8.09762e+07	31.52	18	6
E498	13848.5	2.21256e+07	55.01	2	6
E499	11700.4	1.77827e+08	49.44	42	11
E501	6422.48	4.06703e+07	44.4	9	6
E502	9645.36	6.27251e+07	59.95	15	11
E503	14096.7	2.64653e+07	58.8	2	12
E504	7395.9	6.86358e+07	57.29	11	7
E505	8266.33	5.79562e+07	54.18	11	5
E506	9895.36	3.67158e+07	54.35	3	10
E507	5544.11	1.14257e+08	43.28	186	5
E508	14124.7	3.54714e+07	58.99	5	12
E509	9927.39	7.27848e+07	54.66	10	10
E510	15589.2	9.60165e+07	60.67	16	12
E511	14779.1	5.82334e+07	58.03	15	10
E512	4509.51	2.05663e+08	44.69	170	7
E513	17694.5	3.62606e+07	57.37	5	11
E514	17401.6	1.1654e+08	79.6	50	15
E515	12306.7	4.13268e+08	70.98	230	13
E516	12526.8	2.09646e+07	74.54	7	13
E518	11320.9	1.55698e+08	66.07	43	7
E519	7254.92	4.12267e+08	92.98	636	5
E520	6461.7	3.75179e+07	33.66	3	5
E521	20000.9	3.41577e+07	62.55	5	15
E522	8661.86	8.47613e+07	65.59	16	6
E523	10822.9	1.72717e+08	52.69	57	11
E524	9869.25	6.73988e+07	65.98	14	6
E525	9707.49	3.17214e+07	46.9	15	14
E526	11318.8	1.30574e+07	56.23	1	4
E527	10477.8	8.1675e+07	52.33	8	13
E528	17595.5	1.6114e+07	58.11	2	10
E529	10050.5	1.29122e+07	60.62	1	9
E530	17888.5	5.07245e+07	66.87	12	12
E531	22379.1	5.5532e+07	56.47	7	20
E532	7439.81	5.60383e+07	57.23	21	7
E533	17759.5	3.63502e+07	65.64	18	12
E534	5819.13	2.23343e+07	30.3	3	4
E535	9739.67	1.27014e+07	48.04	1	8
E536	12542.8	3.53339e+07	73.65	22	13
E537	5120.76	1.10471e+08	44.78	69	4
E538	14466.8	4.95078e+07	54.86	8	8
E539	10489.6	7.00879e+07	52.92	8	6
E540	13815.5	5.07219e+07	53.36	6	16
E541	8213.05	5.83501e+07	47.79	13	8
E542	11543.4	1.21733e+08	49.22	27	11
E543	14496.8	5.80135e+07	55.51	9	9
E544	17940.5	3.10852e+07	67.39	4	12
E545	8207.21	9.85737e+07	70.74	30	6
E546	10428.9	2.37167e+07	33.73	2	13
E548	15278.1	8.73771e+07	62.31	15	11
E549	18648.9	2.82988e+07	70.06	9	12
E550	4543.46	4.89206e+07	44.76	48	7
E551	8937.91	3.05937e+07	50.87	5	6
E552	7949.36	7.4355e+07	52.43	13	6
E553	11349.2	1.04615e+08	62.78	25	8
E554	10473.5	3.29045e+07	53.07	3	6
E555	11865.5	2.7701e+07	57.6	4	5
E556	8971.9	1.19513e+07	34.06	1	6
E557	16168.8	3.09254e+07	54.15	7	12
E558	14135.7	1.4207e+07	58.95	2	12
E560	17712.5	1.1841e+07	58.25	1	11
E561	21772.4	2.23261e+07	74.47	3	10
E562	20375	4.84511e+07	62	8	16
E563	16137.6	2.37817e+07	54.52	4	20
E564	15846.7	2.44417e+09	71.12	634	11
E565	15109.9	1.84184e+08	70.34	56	10
E566	5819.07	7.67072e+07	44.46	60	4
E567	9073.9	3.99811e+07	52.16	4	6
E568	15543.2	7.48574e+07	60.29	16	12
E569	8226.3	2.9336e+07	55.84	6	9
E570	7481.97	3.6355e+07	57.3	7	7
E571	9957.38	2.26095e+07	53.53	2	10
E572	5512.16	3.94462e+07	26.75	64	5
E573	15271.5	1.48464e+07	57.87	2	13
E574	18888.4	5.06596e+07	60.32	8	16
E575	14176.7	3.03513e+07	59.41	6	12
E576	21757.4	3.12276e+07	74.51	7	13
E577	10724.7	5.72394e+07	58.35	8	8
E578	8074.07	1.39371e+08	47.23	25	8
E579	6430.83	4.35501e+07	45.96	21	12
E580	16226.8	9.97549e+07	70.8	31	8
E581	23539.9	1.07048e+07	54.83	1	24
E582	11588.8	1.85741e+07	49.35	2	16
E583	12963.9	4.19123e+07	53.96	6	8
E584	8842.57	1.86425e+07	52.28	9	6
E585	6445.75	2.79225e+07	45.78	25	12
E586	14876.1	5.95862e+07	58.21	10	10
E587	5024.73	6.74822e+07	64.88	45	3
E588	14113.7	3.26943e+07	59.36	5	11
E589	8925.95	4.3092e+07	50.46	11	7
E590	5654.27	4.06024e+07	26.42	43	5
E591	9051.85	3.97524e+07	52.45	14	6
E592	6391.47	56514647	44.44	42	6
E593	13047.4	2.10875e+07	58.35	3	10
E594	8236.96	2.37781e+07	55	4	10
E595	8101.1	5.20943e+07	47.53	11	8
E596	7926.01	1.81138e+08	48.42	50	8
E597	22248.2	1.38268e+07	67.18	3	16
E598	4588.67	1.7856e+07	28.85	4	7
E599	9373.08	3.54321e+07	61.73	9	9
E600	8913.93	3.02003e+07	46.58	11	11
E601	6182.51	4.75612e+07	43.69	46	7
E602	7359.42	2.03982e+07	47.7	6	14
E603	21257.7	1.43822e+07	68.51	3	11
E604	13926.5	1.14128e+08	53.81	26	9
E605	6952.91	9.77175e+06	50.78	1	9
E606	11571.4	1.80181e+07	48.78	6	11
E608	11516.4	9.65935e+06	56.17	1	14
E609	8251.08	2.83144e+07	47.84	6	8
E610	9240.46	2.31065e+07	47.19	4	8
E611	12178.1	3.36965e+07	67.23	10	9
E612	22459.1	9.58056e+06	55.73	1	16
E613	7255.92	2.96219e+07	55.19	6	8
E615	5528.12	93943795	43.47	192	5
E616	9771.45	1.06204e+07	54	3	10
E617	13336.6	1.56941e+07	62.03	3	8
E618	9094.15	1.93547e+07	48.11	3	13
E619	12355.6	4.4686e+07	75.48	13	13
E620	11321.2	9.26485e+06	57.24	1	19
E622	6636.81	2.07647e+07	27.04	29	8
E623	13843.7	1.40955e+07	46.76	3	12
E624	11684.4	1.50649e+08	49.52	41	11
E625	16153.5	9.17777e+06	54.9	1	21
E626	4624.56	9.13873e+07	44.71	99	7
E627	13609.3	1.19137e+08	64.36	36	8
E628	13550.8	1.01353e+07	62.69	3	14
E629	19322	9.02341e+06	48.96	1	25
E630	11561.4	1.75027e+07	49.87	2	9
E631	10786.9	2.80941e+07	54.67	5	11
E632	4479.53	2.18116e+08	44.24	231	6
E633	8116.1	2.73851e+07	47.42	5	8
E634	14003.5	8.64119e+07	52.83	15	9
E635	12304.9	1.60713e+07	54.92	6	12
E637	11669.4	1.34903e+08	55.45	38	10
E638	13754.6	1.74758e+07	54.72	4	11
E639	5448.14	6.64833e+07	34.16	206	5
E640	13870.4	3.52352e+07	52.65	11	9
E641	14752.1	1.18809e+07	57.65	3	9
E643	17488.9	1.29598e+08	89.84	110	8
E644	5624.12	2.42788e+07	43.42	63	5
E645	17679.6	1.34365e+07	65.75	5	10
E647	5943.2	4.93909e+07	54.4	13	6
E648	10935.2	3.07785e+07	59.73	21	10
E649	15059.5	2.62371e+07	58.91	9	13
E650	3134.81	9.43431e+07	60.98	25	4
E652	6671.5	2.91692e+07	44.98	15	6
E653	9871.4	1.15946e+07	48.7	2	14
E654	4921.87	3.40227e+07	51.91	6	7
E656	9773.43	3.66309e+07	48.54	19	14
E657	10546.6	5.39461e+07	52.15	18	6
E658	14507.8	7.96609e+06	54.95	1	5
E659	13110.4	1.42036e+07	57.37	6	11
E660	15508.2	2.4315e+07	59.45	6	13
E661	11337.2	1.4876e+07	56.42	5	20
E662	15846.7	1.239e+09	79.76	673	11
E663	7942.01	9.20362e+07	48.38	38	8
E664	8945.63	2.02339e+07	52.03	6	6
E665	6900.78	1.90139e+07	48.94	9	4
E666	6859.91	11841961	27.21	9	8
E667	13875.7	1.91263e+07	46.76	5	13
E668	6186.25	7.59611e+06	55.43	1	6
E669	10864.9	4.0071e+07	58.03	10	7
E671	16152	1.09128e+07	54.19	2	6
E672	6658.8	3.62481e+07	46.35	12	12
E674	15846.7	3.85643e+07	65.91	14	11
E676	15753.2	1.41217e+07	60.7	2	12
E677	5464.13	6.43525e+07	26.59	215	5
E678	15413.7	1.96632e+07	60.73	4	16
E679	6571.44	2.54664e+07	45.66	23	6
E680	11501.1	7.25774e+06	56.32	1	21
E681	28228.6	7.7572e+06	86.11	3	25
E682	11650.4	7.83225e+06	47.99	3	11
E683	24762.5	7.21914e+06	61.53	1	4
E684	22395.8	7.21606e+06	55.93	1	8
E685	10051	7.20821e+06	59.09	1	9
E686	9192.86	5.62001e+07	50.38	15	6
E687	3923.46	1.75957e+07	27.57	12	9
E688	4447.53	2.59494e+08	44.55	354	7
E690	15393.1	1.17557e+07	62.13	2	12
E691	20035	7.03337e+06	61.85	1	9
E693	4505.61	2.96696e+07	29.88	13	7
E694	17504.9	9.05582e+07	89.52	86	7
E695	22443.1	6.99708e+06	55.73	1	16
E696	9741.22	8.94892e+06	49.21	2	20
E697	8683.82	6.99157e+06	55.36	1	8
E698	3655	2.3514e+07	44.47	18	4
E700	4611.5	5.71436e+07	45.19	83	7
E701	4050.09	6.69547e+07	45.12	92	2
E702	12518.9	6.80229e+06	54.99	1	13
E703	7958.01	3.5985e+07	47.88	11	8
E704	9793.4	1.28106e+07	53	3	9
E705	13996.7	1.00887e+07	47.42	2	13
E706	20005.5	6.77013e+06	61.5	1	23
E707	4415.54	8.09233e+07	44.99	115	7
E708	17691.5	1.64531e+07	66.2	6	12
E710	6390.77	3.09682e+07	46.18	32	12
E711	13892.7	1.14019e+07	46.93	2	13
E712	7264.65	1.2413e+07	47.98	4	8
E713	8569.81	7.10117e+07	47.97	29	9
E714	11388.1	5.2005e+07	50.23	22	7
E715	8824.57	3.60267e+07	53.26	19	6
E716	7942.49	2.34107e+07	51.11	15	12
E717	14459.8	2.46196e+07	53.46	4	7
E718	10060.7	1.96658e+07	59.55	4	9
E719	14512.8	3.06712e+07	55.66	8	8
E720	13088.4	2.43977e+07	58.36	8	11
E722	13858.8	6.47916e+06	47.37	1	10
E723	9706.64	1.93509e+07	46.8	8	10
E724	13832.5	6.41544e+06	53.82	1	6
E725	6653.8	1.27301e+07	26.88	9	8
E727	7329.09	1.5796e+07	57.24	4	6
E728	6952.56	9.90089e+06	51.09	2	10
E729	9308.96	1.72239e+07	52.79	4	6
E730	14417.8	6.32068e+06	54.48	1	5
E731	15401.9	3.16798e+07	66.89	13	3
E732	11389.5	2.01374e+07	50.39	6	16
E733	10592.8	2.11126e+07	52	6	13
E734	17575.5	6.25317e+06	58.23	1	10
E736	12334.7	8.88102e+07	71.59	45	13
E737	13769.6	1.90536e+07	54.72	8	11
E739	9117.02	1.74518e+07	49.62	3	6
E740	7875.29	6.71349e+07	55.3	20	9
E741	14219.6	1.97488e+07	58.04	6	11
E742	8730.79	3.41617e+07	65.25	16	7
E743	24748.6	6.16496e+06	61.76	1	21
E744	8674.62	6.15887e+06	55.93	1	6
E745	6341.49	1.97696e+07	31.25	5	6
E746	17713.6	3.7456e+07	66.14	18	12
E747	7338.46	1.28147e+07	46.61	4	14
E748	9059.93	1.7037e+07	50.5	8	6
E749	5913.29	4.97243e+07	100.31	49	4
E750	4122.27	7.53906e+06	46.39	3	5
E751	14483.8	1.34407e+07	56.35	5	9
E752	22395.1	6.00851e+06	56.77	1	22
E753	6856.89	1.62431e+07	46.74	17	8
E754	13045	5.95308e+06	56.06	1	9
E756	11676.6	1.65895e+07	51.31	5	16
E757	17417.6	4.95978e+07	78.44	49	15
E758	13871.4	5.87303e+06	52.22	1	12
E759	12584.9	1.21639e+07	73.98	7	13
E760	6621.75	1.97768e+07	30.41	44	8
E761	9761.46	1.14426e+07	34.13	2	10
E762	15727.3	2.58651e+07	62.66	7	12
E763	8976.57	2.90912e+07	53.6	19	6
E764	6330.75	2.33417e+07	46.05	10	12
E765	8741.8	1.93813e+07	46.1	7	9
E766	9666	2.07037e+07	49.24	6	14
E767	10930.2	1.11353e+07	58.37	7	10
E768	13077.4	1.51705e+07	58.56	6	9
E769	15376.1	1.44534e+07	62.29	5	11
E770	9645.39	9.6976e+06	34.27	2	10
E771	15732.2	3.11293e+07	63.75	17	12
E772	18320.8	5.68149e+06	62.45	1	16
E774	14497.8	7.30144e+06	55.6	2	6
E775	6461.66	5.66472e+06	47.63	1	9
E776	17472.9	1.32719e+08	89.81	101	8
E777	17665.6	2.72516e+07	66.81	8	12
E779	15241.6	5.56874e+06	60.17	1	6
E780	5528.13	2.2459e+07	27.89	217	5
E781	7524.88	5.17507e+07	96.4	59	5
E782	9798.22	3.72901e+07	78.82	53	12
E783	13188.4	2.19902e+07	58.15	6	11
E785	8255.87	5.49924e+06	62.29	1	10
E786	8880.77	2.78142e+07	48.2	9	9
E787	8748.81	5.47183e+06	62.69	1	13
E788	9782.23	2.59704e+07	80.2	25	12
E789	10391.5	1.05271e+07	52.65	2	6
E790	4710.5	1.64694e+07	46.28	20	4
E791	9390.21	2.15714e+07	62.77	10	9
E792	8152.36	1.28414e+07	34.57	3	5
E793	6457.55	1.5434e+07	44.77	11	6
E794	10608.8	1.91531e+07	51.31	5	13
E795	5796.69	5.30551e+06	48.77	1	14
E796	8184.36	5.28761e+07	53.62	47	5
E797	6717.81	1.00188e+07	26.85	8	8
E798	5608.13	7.26457e+06	43.64	13	5
E799	9075.01	2.33229e+07	47.38	10	11
E800	17778.5	2.00549e+07	66.66	7	12
E801	9870.59	7.05217e+06	48.51	2	9
E802	9731.38	1.91255e+07	55.32	12	12
E803	10172.6	8.20596e+06	59.48	2	10
E804	8682.16	5.1157e+06	55.36	1	26
E805	5052.91	5.10974e+06	51.91	1	7
E806	12286.7	3.2948e+07	75.39	11	13
E807	8079.02	3.3764e+07	48.34	24	8
E808	22232.2	1.23181e+07	67.31	3	15
E809	6597.75	9.55359e+06	46.09	4	12
E810	14071.5	2.42152e+07	55.47	8	10
E811	5546.11	5.23964e+07	33.22	217	5
E812	8460.81	2.70834e+07	46.94	14	9
E813	11680.4	9.69668e+06	50	3	10
E814	12906	8.37358e+06	59.57	2	16
E815	8572.74	1.88824e+07	62.35	12	8
E816	13453.8	1.42644e+07	63.31	8	14
E817	7420.91	8.7281e+06	56.16	3	4
E818	15786.4	4.92923e+06	56.61	1	15
E819	13346.2	2.8951e+07	62.46	12	11
E820	8786.73	1.10288e+07	46.12	5	9
E821	11768.5	4.91246e+06	58.45	1	8
E822	15312.9	4.85986e+06	61.99	1	17
E823	7337.85	4.85492e+06	56.16	1	3
E824	13550	5.3047e+06	62.58	2	9
E825	17815.5	1.70993e+07	66.38	6	13
E826	7281.44	8.08877e+06	47.43	4	14
E827	7854.43	7.48126e+06	59.57	2	10
E828	7342.67	6.98688e+06	47.72	2	7
E829	12245.7	4.78534e+06	73.08	1	26
E830	5464.32	4.77541e+06	43.47	1	23
E831	22365.1	4.76136e+06	56.31	1	18
E832	14203.7	8.15936e+06	57.51	3	12
E833	7189.93	9.20884e+07	93.82	120	5
E834	9276.95	3.55198e+07	56.94	14	5
E836	8236.63	8.9012e+06	55.12	2	9
E837	6567.46	6.01673e+06	44.11	5	6
E838	7265.45	1.66196e+07	48.03	10	14
E839	17520.8	4.62688e+07	89	48	8
E840	15830.6	2.71198e+07	60.91	10	11
E841	4488.56	3.71047e+07	32.29	96	7
E842	13917.5	7.13026e+06	52.07	2	9
E844	15034.6	1.54694e+07	72.11	7	3
E845	6457.71	4.60619e+06	52.73	1	4
E846	10050.3	1.24106e+07	60.12	4	10
E847	7253.12	2.81893e+07	94.17	65	23
E848	19702.3	1.04013e+07	63.65	3	16
E849	14188.7	2.48078e+07	57.93	13	13
E850	9682	4.49677e+06	47.74	1	14
E852	5416.15	5.33389e+07	32.38	125	5
E853	22280.2	2.40604e+07	66.62	15	17
E854	10357.5	4.43729e+06	52.93	1	6
E855	5461.12	1.4705e+07	43.4	39	5
E856	9292.94	4.0935e+07	56.8	19	5
E857	9145.99	4.37457e+06	47.25	1	13
E858	20789.4	4.34713e+06	59.9	1	20
E859	11814.3	1.81194e+07	48.89	6	11
E860	5416.11	5.35286e+06	25.77	9	5
E861	13468.9	8.72116e+06	64.69	6	11
E862	17596.7	4.30013e+06	59.83	1	7
E864	6346.78	6.75563e+07	52.62	73	12
E865	8803.86	1.1748e+07	46.65	4	9
E866	6455.48	5.04583e+07	32.55	23	6
E867	12359.7	5.91238e+06	73.4	8	13
E868	6443.74	1.41365e+07	45.8	13	3
E869	10805.9	1.02552e+07	34.03	3	10
E870	8126.1	9.6996e+06	47.78	3	8
E871	15125.9	4.86088e+07	69.56	26	9
E872	13534.8	1.9935e+07	100.15	19	4
E873	13337.3	4.14319e+06	62.45	1	18
E874	9697.3	7.91476e+06	59.3	3	11
E875	10227.4	2.42674e+07	64.54	8	6
E876	5464.36	4.59155e+06	26.54	13	23
E877	18936.4	7.82494e+06	59.93	2	16
E879	5771.15	8.01069e+06	46.66	2	6
E880	14524.8	1.38001e+07	55.1	7	8
E881	11798.3	9.2878e+06	49.15	4	10
E882	13968.7	4.02355e+06	47.29	1	26
E883	6813.76	1.32028e+07	43.58	14	8
E884	3476.12	4.04272e+07	45.3	97	7
E885	11402.1	4.01441e+06	57.43	1	23
E886	4504.55	7.00468e+07	44.06	223	7
E887	5231.92	3.99956e+06	52.66	1	4
E888	6214.34	6.45685e+06	50.42	3	4
E889	6097.61	1.16074e+07	45.31	14	11
E890	11289.5	3.97126e+06	33.79	1	17
E891	4463.53	1.27439e+08	44.52	238	7
E892	7837.96	3.94508e+06	54.96	1	9
E893	20390.9	3.94346e+06	60.12	1	17
E894	9739.56	3.93757e+06	49.09	1	10
E895	4493.51	1.07127e+07	33.12	3	7
E896	8702.76	1.80338e+07	65.29	7	7
E897	6543.66	5.59301e+07	53.44	28	5
E898	14737.1	5.69219e+06	57.56	3	8
E899	14643.9	4.25019e+06	98.07	3	4
E900	6471.49	9.05196e+06	31.02	9	6
E901	4832.48	1.22876e+07	45.21	26	2
E902	15074.2	3.88202e+06	59.96	1	10
E903	13270.4	7.43864e+06	58.26	2	11
E904	7329.44	4.14843e+06	46.14	3	14
E905	9692.23	6.03559e+06	47.45	3	21
E907	4588.62	8.18581e+06	31.22	11	7
E908	7467.95	1.02937e+07	57.26	5	7
E909	13646.2	5.68298e+06	65.1	2	8
E911	16952.6	1.01705e+07	63.8	4	9
E912	17728.6	1.89392e+07	66.1	15	12
E913	6454.76	1.22262e+07	46.09	5	12
E914	15434.9	9.05956e+06	65.39	7	4
E915	16472.1	1.98968e+07	68.25	13	9
E916	4429.52	8.72398e+07	44.63	199	7
E917	10724.9	1.71687e+07	52.74	9	13
E918	14020.5	1.1364e+07	51.19	5	9
E919	10089.3	1.65025e+07	62.5	6	6
E920	15584.2	1.50822e+07	60.09	9	12
E921	4463.58	1.19626e+07	29.6	8	7
E923	9488.55	3.64279e+06	84.04	1	9
E924	20019.1	5.60647e+06	62.04	2	7
E925	15846.7	4.73834e+08	86.84	474	11
E926	6687.5	1.26917e+07	45.22	21	6
E927	4638.52	5.3675e+07	45.18	109	7
E928	5480.32	7.34398e+06	43.19	8	23
E929	13723.6	3.60982e+06	54.86	1	11
E930	7540.87	5.31087e+07	96.4	96	5
E931	13483.9	7.05067e+06	62.6	3	13
E932	14024.4	8.76457e+06	54	3	9
E933	12562.6	1.74293e+07	74.33	13	13
E934	5640.12	2.2045e+07	43.25	76	5
E935	9136.07	3.54643e+06	49.73	1	7
E936	8700.85	9.97001e+06	46.65	3	9
E937	17456.9	6.15878e+07	89.95	70	7
E938	6456.84	4.03733e+06	46.49	2	12
E939	4579.58	2.9657e+07	43.99	82	7
E940	17770.6	26839840	64.14	21	13
E941	5720.11	6.39857e+06	43.27	9	5
E942	18665	1.11338e+07	69.65	8	12
E943	6362.77	1.20412e+07	45.75	13	12
E944	8549.84	1.06521e+07	54.1	5	9
E946	9687.4	5.57976e+06	59.57	2	11
E947	9888.23	3.41788e+06	47.92	1	19
E948	3353.84	2.89914e+07	44.51	70	4
E950	15083.1	5.05825e+06	58.75	4	15
E951	10970.8	6.27645e+06	54.26	2	11
E952	5777.12	3.3372e+06	25.55	1	5
E953	6494.53	6.95639e+06	44.87	7	6
E954	9466.7	3.29747e+06	59.32	1	22
E955	7331.94	3.89605e+06	55.34	2	10
E956	13368.3	7.46947e+06	75.42	4	13
E957	7315.93	3.28178e+06	55.7	1	11
E958	6399.49	1.49352e+07	47.02	14	6
E959	9751.42	1.4245e+07	56.74	10	11
E960	7328.64	5.52479e+06	46.03	2	8
E961	5204.69	3.22478e+06	55.93	1	10
E962	11418.4	3.21052e+06	58.08	1	14
E963	6670.81	4.55883e+06	26.99	5	8
E964	4447.59	1.23683e+07	29.82	8	7
E965	9686.28	1.16377e+07	59.53	5	11
E966	10526.8	7.2289e+06	50.41	4	13
E968	19969.8	6.9168e+06	62.01	3	14
E969	23103.6	3.1363e+06	63.63	1	8
E970	17535.9	1.5858e+07	87.9	28	7
E971	13551.5	3.11878e+06	62.49	1	21
E972	8705.59	6.46983e+06	63.62	3	15
E973	12344.7	5.74478e+06	74.76	11	12
E974	9670.28	6.03825e+06	60.01	2	11
E975	6558.5	3.0676e+07	45.36	53	6
E976	15044.2	5.92887e+06	61.09	4	14
E977	16241.8	3.73978e+06	70.07	3	8
E978	15525.7	1.07653e+07	59.03	5	16
E979	6637.78	1.22195e+07	43.57	21	8
E980	6440.41	1.31702e+07	44.7	26	6
E983	13831.5	3.02116e+06	53.02	1	15
E984	12578.6	2.1063e+07	73.64	20	13
E985	11305.2	9.73913e+06	57.58	4	21
E986	9789.43	8.40023e+06	47.87	5	14
E987	16157.7	7.5e+06	61.52	3	10
E988	8136.35	3.99791e+06	54.81	3	4
E989	13567.8	5.12099e+06	63.24	6	14
E990	4440.53	4.38507e+07	45.03	75	7
E991	2880.52	1.27065e+07	44.54	19	2
E992	10390.7	3.72257e+06	54.76	3	6
E993	6596.81	8.42269e+06	27.97	12	8
E994	11592.4	1.82978e+07	49.59	10	11
E995	10542.5	8.63411e+06	53.75	8	6
E996	6141.37	5.77965e+06	44.93	2	6
E997	6613.61	2.91792e+06	30.49	1	6
E998	16013.2	2.89345e+06	62.76	1	12
E1000	7695.91	1.16832e+07	58.66	5	7
E1001	4595.58	4.17493e+07	43.93	115	7
E1003	21789.4	7.1855e+06	74.16	4	12
E1004	7358.65	6.50686e+06	47.72	3	8
E1005	18261.6	3.78709e+06	64.99	2	11
E1006	7238.91	3.98822e+07	99.41	100	5
E1007	8298.27	5.52177e+06	50.68	3	8
E1008	6445.69	4.45133e+07	58.72	77	5
E1009	4472.55	1.02831e+07	33.2	16	7
E1010	17495.6	7.46904e+06	75.8	4	15
E1011	7508.88	1.98015e+07	96.25	26	5
E1012	10708.9	1.01733e+07	53.73	11	13
E1013	15438	2.79026e+06	66.84	1	24
E1014	7415.97	7.57981e+06	53.38	5	6
E1015	4521.61	1.24159e+07	29.31	8	7
E1017	5399.15	5.36987e+06	26.47	10	5
E1018	3353.84	1.82746e+07	32.1	18	4
E1019	9885.24	2.13767e+07	65.82	15	6
E1020	12331	2.74393e+06	73.88	1	5
E1021	11341.1	4.33548e+06	60.43	2	11
E1022	6378.77	1.59709e+07	46.03	20	12
E1023	20406.9	2.71825e+06	59.86	1	15
E1024	5464.12	1.96997e+07	32.49	103	5
E1025	3552.95	17869418	44.53	30	4
E1026	17800.6	1.24636e+07	66.39	7	12
E1027	14660.8	16136611	96.7	18	7
E1028	17487.9	3.68527e+06	88.19	3	4
E1030	15783.7	1.11184e+07	76.37	16	11
E1031	11341.8	5.12641e+06	66.65	2	7
E1033	6529.81	2.07849e+07	46.24	17	12
E1034	12194.1	1.92184e+07	66.54	14	9
E1035	8248.71	2.62379e+06	61.09	1	14
E1036	13281.5	2.62313e+06	59.64	1	10
E1037	16112.8	8.30358e+07	76.17	79	11
E1038	5020.73	2.19198e+07	66.06	34	3
E1039	9416.91	5.68679e+06	60.71	3	4
E1040	11785.7	2.60778e+06	57.63	1	26
E1041	9361.06	1.27379e+07	62.38	9	9
E1042	16033.9	1.63676e+07	76.47	22	12
E1043	7386	7.15933e+06	56.64	10	6
E1044	9757.56	3.36962e+06	49.95	2	12
E1045	9700.41	2.52408e+06	59.59	1	11
E1046	5517.87	1.26416e+07	47.43	10	6
E1047	26037.5	2.52084e+06	56.06	1	26
E1048	6634.56	4.094e+06	59.62	2	8
E1049	7194.87	3.18093e+07	94.65	71	5
E1050	6734.18	3.57507e+06	44.07	4	14
E1051	19999	2.50309e+06	62.78	1	11
E1052	4604.63	1.70494e+07	29.29	235	7
E1054	17936.6	7.87676e+06	67.8	5	12
E1055	16467.8	4.80292e+06	60.47	2	5
E1056	8095.02	1.26751e+07	47.84	7	7
E1057	7471.06	2.44881e+06	57.23	1	9
E1058	12370.2	2.43911e+06	54.66	1	7
E1059	13942.5	1.43218e+07	52.39	10	9
E1060	5056.9	1.22693e+07	50.86	17	7
E1061	13945.7	4.61087e+06	47.37	2	11
E1062	8706.84	5.70744e+06	63.39	3	8
E1063	4112.45	1.39481e+07	48.37	28	7
E1064	8247.31	2.414e+06	54.93	1	8
E1065	16301	1.14558e+07	76.57	11	12
E1066	23086.9	2.40454e+06	64.64	1	16
E1067	9718.41	2.4033e+06	54.03	1	10
E1068	7673.31	5.00319e+06	51.36	4	7
E1069	7280.67	2.39771e+06	47.84	1	8
E1070	13566	2.392e+06	63.7	1	8
E1071	8631.85	7.49154e+06	64.63	5	7
E1072	5498.14	1.58862e+07	27.83	133	4
E1073	7222.92	3.46077e+07	100.07	248	5
E1074	6370.48	3.79987e+06	44.06	2	6
E1075	21278.7	4.45602e+06	69.86	3	10
E1076	4627.49	2.90768e+07	45.14	75	7
E1077	15107.2	4.25054e+06	59.84	2	15
E1078	8611.77	5.76632e+06	47.4	7	9
E1079	12556.8	2.05137e+07	72.27	24	13
E1080	5477.12	5.85006e+06	43.11	26	5
E1081	13614.2	8.26193e+06	65.21	8	8
E1082	7337.7	2.26292e+06	46.83	1	8
E1083	10084.4	2.25594e+06	59.59	1	6
E1084	4521.55	3.88818e+07	44.09	106	7
E1085	6473.55	1.1324e+07	44.65	21	6
E1086	7282.24	3.66166e+06	48.2	3	19
E1087	5544.11	2.03315e+07	26.38	92	5
E1088	4945.54	2.21577e+06	61.62	1	16
E1089	8350.71	2.21221e+06	50	1	8
E1090	5428.17	4.32127e+06	27.95	2	5
E1091	10440.9	1.06852e+07	50.68	11	12
E1092	13336.3	2.19314e+06	62.41	1	9
E1093	14104.4	2.17354e+06	85.91	1	10
E1094	9536.06	7.52294e+06	57.03	5	5
E1095	9660.45	2167021	48.8	1	16
E1096	10779.5	2.16615e+06	53.97	1	9
E1098	9687.57	2.15174e+06	47.93	1	14
E1099	14113.5	2.14743e+06	86.18	1	5
E1100	13848.7	3.78567e+06	47.42	3	13
E1101	13567.7	2.13731e+06	63.83	1	18
E1102	12607.4	1.17854e+07	50.87	16	12
E1103	10327.5	2.12299e+06	52.86	1	10
E1104	13878.5	7.54552e+06	51.2	6	9
E1105	9178.88	6.92812e+06	49.72	4	7
E1106	12322.2	2.10487e+06	56.3	1	7
E1107	4484.56	6.08329e+06	45.23	20	7
E1108	7202.92	2.09459e+06	91.91	1	5
E1109	9427.91	2.08774e+06	62.76	1	6
E1110	9362.18	7.52945e+06	62.35	5	9
E1111	7344.14	2.08151e+06	48.22	1	22
E1112	9376.19	6.55115e+06	62.65	4	9
E1113	7265.16	2.26085e+07	97.13	58	22
E1114	5686.26	1.47855e+07	26.2	99	5
E1115	6732.54	4.20303e+06	44.21	4	4
E1117	7489.09	1.30515e+07	92.01	12	5
E1118	9898.58	5.77045e+06	54.25	3	10
E1119	3552.95	6.93137e+06	32.26	10	4
E1120	12574.8	8.17374e+06	69.92	10	13
E1121	7378.75	2.0543e+06	56.56	1	7
E1122	22119.7	2.05258e+06	71.96	1	8
E1123	18024.6	2.04172e+06	66.22	1	12
E1124	7312.61	2.03372e+06	46.7	1	9
E1125	6502.71	5.63658e+06	49.14	3	5
E1126	11272.9	5.84493e+06	66.63	4	7
E1127	9644.45	7.23285e+06	49.34	5	14
E1128	6498.6	1.33068e+07	53.3	12	5
E1129	9345.08	6.9682e+06	63.14	9	9
E1131	6829.74	4.94115e+06	48.96	5	4
E1132	11765.6	5.3214e+06	70.01	3	25
E1133	17597.6	3.14075e+07	78.39	27	15
E1134	4479.52	6.41905e+06	32.32	89	7
E1135	15693.3	2.85143e+06	62.99	2	11
E1136	13064.4	1.97591e+06	58.89	1	11
E1137	28174.5	2.37904e+06	83.72	2	25
E1138	6612.78	5.13343e+06	28.27	9	8
E1140	13550.8	1.21331e+07	99.61	20	4
E1141	8980.56	2.44648e+06	63.03	2	9
E1142	5528.13	1.49526e+07	32.87	126	5
E1143	3654	2.11171e+06	32.61	7	4
E1144	8661.69	1.47891e+07	49.02	19	7
E1145	9304.79	8.4571e+06	64.66	8	5
E1146	13952.7	2.82155e+06	47.33	2	26
E1148	9815.58	4.85074e+06	51.73	4	13
E1149	7621.5	1.9205e+06	61.3	1	8
E1150	13157.4	1.92028e+06	57.75	1	11
E1152	7985.05	8.92854e+06	48.58	8	8
E1153	10444.7	3.09111e+07	67.24	39	8
E1154	12551.5	3.41151e+06	64.11	2	7
E1155	7178.88	1.92549e+07	94.53	68	5
E1156	9804.59	3.22349e+06	46.51	2	9
E1157	17904.5	1.86397e+06	66.69	1	13
E1159	12588.8	5.70452e+06	73.54	7	13
E1160	2887.66	9.49984e+06	44.63	39	5
E1161	17675.5	1.84782e+06	66.11	1	11
E1162	4562.58	1.67682e+07	43.78	92	7
E1163	13085.1	1.8391e+06	57.27	1	10
E1164	13324.9	1.83338e+06	62.65	1	10
E1165	11767.5	6.17475e+07	67.26	91	4
E1166	17069.1	6.53271e+06	70.14	6	8
E1167	6656.8	1.79362e+06	27.02	1	26
E1168	14965.2	1.78687e+06	61.41	1	14
E1169	8234.3	2.99124e+06	54.88	4	5
E1170	6612.76	7.05789e+06	43.89	16	8
E1171	5476.14	3.46372e+06	31.07	44	5
E1174	5772.15	6.13611e+06	27.85	9	5
E1176	6542.52	1.2187e+07	45.34	27	6
E1177	9869.35	3.31171e+06	60.13	2	11
E1178	12294.9	1.70984e+06	55.13	1	13
E1179	11394.1	1.70789e+06	61.96	1	10
E1181	8558.77	9.40748e+06	47.15	8	9
E1182	17613.6	1.82632e+07	77.12	26	15
E1183	5480.13	1.90785e+07	30.61	105	5
E1184	8973.86	7.10307e+06	64.59	6	5
E1185	4509.5	4.76844e+06	33.12	4	7
E1186	8049.03	3.8658e+06	47.75	5	8
E1187	9814.22	9.05594e+06	77.89	20	12
E1188	13560.2	1.66632e+06	65.25	1	8
E1189	13611.5	6.74435e+06	88.75	13	12
E1190	15765.2	3.06597e+06	62.87	2	12
E1191	17749.6	1.65022e+06	64.73	1	12
E1192	18681.9	9.71475e+06	91.82	27	11
E1193	6455.45	2.29695e+06	45	6	3
E1194	15846.7	9.05237e+07	93.09	154	11
E1195	7254.91	2.16023e+07	98.34	44	5
E1196	7430.87	2.11164e+06	56.31	2	7
E1197	7166.55	8.80707e+06	46.88	14	7
E1198	7322.82	5.1692e+06	56.15	7	7
E1199	4709.98	1.61155e+06	55.71	1	5
E1200	15141.9	7.72971e+06	68.8	11	11
E1201	8207.54	7.42377e+06	46.23	19	10
E1202	15556.1	2.71472e+06	60.98	2	13
E1203	10139.7	2.62237e+06	52.62	3	11
E1204	13072.4	3.82826e+06	59.11	4	10
E1205	4654.5	2.52165e+07	45.21	104	7
E1206	26666.8	1.56251e+06	87.5	1	26
E1207	9618.72	2.72071e+06	59.31	3	16
E1209	18666	1.57608e+07	91.61	35	11
E1210	19981.8	1.54524e+06	62.65	1	13
E1213	8200.35	1.32919e+07	52.11	16	5
E1214	16379	1.32521e+07	75.06	19	11
E1215	11376	5.40288e+06	62.12	5	10
E1217	7370.02	7.04538e+06	57.49	7	6
E1218	18277	1.46933e+06	64.83	1	17
E1219	16193.7	4.3028e+06	71	6	7
E1220	16566.2	6.99468e+06	76.46	9	12
E1221	10779.2	1.46359e+06	54.23	1	8
E1223	4479.58	4.30909e+06	28.94	4	7
E1224	3150.81	6.10521e+06	61.43	6	4
E1225	9209.99	6.31851e+06	47.57	11	11
E1227	4430.59	4.13744e+06	29.62	4	7
E1228	12793	1.42616e+06	74.35	1	13
E1229	24940.4	1.41701e+06	60.56	1	12
E1230	7217.96	1.84875e+07	96.48	35	5
E1231	8649.61	5.08217e+06	63.33	5	7
E1232	2971.64	5.55729e+06	50.07	5	3
E1233	5485.14	3.38545e+06	32.18	7	25
E1234	28183.5	2.64983e+06	84.57	3	25
E1235	23572	1.40576e+06	55.7	1	19
E1236	8032.04	4.11882e+06	47.55	4	8
E1237	5491.87	4.21611e+06	57.58	5	5
E1238	7210.87	2.36515e+07	94.61	75	5
E1239	21424.7	1.38958e+06	70.42	1	10
E1240	15090.6	1.60261e+06	59.85	2	6
E1241	8176.33	3.83622e+06	71.18	6	2
E1242	9756.65	1.37787e+06	50.3	1	9
E1243	7322.46	1.37412e+06	47.42	1	14
E1244	13113.3	1.36795e+06	58.24	1	14
E1245	4565.52	1.52266e+07	45.02	79	7
E1246	8657.79	1.36259e+06	33.39	1	9
E1247	6401.78	2.37012e+06	46.52	3	12
E1248	4582.59	2.79906e+06	44.2	6	26
E1249	5704.11	1.44827e+06	43.63	3	5
E1252	8001.05	4.04113e+06	48.17	6	8
E1253	16969	5.50559e+06	70.4	5	8
E1254	4531.59	3.56418e+06	43.85	3	7
E1255	4455.53	1.61608e+07	44.69	48	7
E1256	21258.8	1.32884e+06	68.7	1	8
E1257	9405.18	2.55906e+06	85.9	2	9
E1259	9886.59	1.32654e+06	47.78	1	9
E1260	15818.4	1.3173e+06	56.39	1	16
E1261	4363.35	1.47473e+06	43.76	8	3
E1262	15667.2	1.30993e+06	62.76	1	12
E1263	13993.8	1.3076e+06	47.03	1	25
E1265	22244.2	1.30101e+06	66.15	1	2
E1266	14501.7	1.2994e+06	55.83	1	10
E1267	7958.49	5.62871e+06	49.66	7	12
E1268	17086.1	2.51427e+06	70.05	4	7
E1269	28199.4	1.35752e+06	86.19	2	22
E1271	8507.85	1.27673e+06	33.26	1	9
E1272	10460.9	1.2737e+06	50.52	1	13
E1273	17864.5	2.37513e+06	66.44	2	12
E1274	7506.09	6.86859e+06	91.44	11	5
E1275	6451.8	3.05984e+06	60.65	4	10
E1276	12350.7	1.02249e+07	69.88	17	13
E1277	6461.69	1.94584e+07	55.96	40	5
E1278	7269.09	3.11656e+06	95.19	12	23
E1279	6997.84	1.26576e+06	47.2	1	7
E1280	9405.52	1.26562e+06	85.76	1	18
E1283	5780.17	1.25149e+06	48.93	1	14
E1284	8606.8	7.14938e+06	45.96	10	9
E1285	4985.82	2.38742e+06	42.8	6	7
E1286	6522.52	5.08425e+06	51.02	7	7
E1287	10768.5	1.24594e+06	54.12	1	9
E1288	16953	4.60528e+06	70.18	5	8
E1289	4605.5	1.98359e+07	45.18	50	4
E1290	8223.21	6.7965e+06	68.19	14	6
E1291	6005.47	1.23154e+06	52.47	1	11
E1292	9929.39	1.37109e+06	60.16	2	11
E1293	12210.1	4.02209e+06	65.8	6	10
E1295	14903.3	1.47289e+06	87.17	5	8
E1296	15989.7	2.11328e+06	55.49	2	14
E1298	11289.4	1.19577e+06	57.72	1	14
E1299	16955.3	2.34264e+06	61.09	2	11
E1300	26016.3	1.19067e+06	56.77	1	4
E1301	11358.8	1.18852e+06	66.32	1	6
E1302	9788.67	1.17495e+06	47.38	1	7
E1303	6815.65	2.84699e+06	54.04	4	6
E1304	10444.7	1.00053e+07	71.7	14	8
E1305	17645.5	1.16611e+06	56.13	1	26
E1306	5736.11	5.60344e+06	43.19	24	5
E1307	17455.9	1.15301e+06	89.57	1	4
E1309	17511.6	3.27429e+06	74.79	3	15
E1310	17722.6	2.27976e+07	72.5	32	12
E1311	7464.85	1.14076e+06	56.19	1	7
E1312	11074.7	1.40004e+06	99.14	2	7
E1313	13909.7	1.13952e+06	47.63	1	13
E1314	4581.53	1.117e+07	44.41	41	7
E1315	28216.5	1.13825e+06	83.77	1	25
E1316	21950.1	1.1373e+06	75.58	1	13
E1317	4446.52	3.00727e+06	33.07	35	7
E1318	8705.49	1.61045e+06	63.55	2	18
E1319	8564.78	2.88455e+06	46.2	10	9
E1321	17552.8	3.4636e+06	86.87	7	8
E1322	9985.36	1.11165e+06	48	1	14
E1323	6909.75	2.95378e+06	43.49	5	8
E1324	6551.46	6.54327e+06	44.41	11	6
E1325	5501.32	1.10806e+06	31.02	1	20
E1326	17433.6	3.95702e+06	77.55	6	15
E1328	9327.93	1.53369e+06	46.81	2	11
E1329	8282.33	2.91525e+06	53.54	3	5
E1330	13895.5	2.40621e+06	51.49	3	9
E1331	10001.8	1.08339e+06	51.67	1	18
E1332	12400.8	3.31595e+06	76.67	9	13
E1333	8747.82	1.3292e+06	65.12	3	7
E1334	6956.8	4.23716e+06	65.75	7	6
E1335	4545.57	8.02482e+06	43.9	39	7
E1336	8523.82	3.65754e+06	46.51	6	9
E1337	3418.86	5.82146e+06	51.76	13	6
E1338	7150.55	2.99587e+06	47.66	4	7
E1339	10426.4	1.65985e+06	54.11	3	6
E1340	7260.85	4.14306e+06	95.87	9	5
E1341	13963.7	1.74141e+06	47.37	2	13
E1342	9772.72	1.06864e+06	48.4	1	6
E1343	15050.6	2.21508e+06	71.47	3	5
E1344	7411.89	1.05466e+06	57.39	1	7
E1345	5432.15	2.78003e+07	33.05	179	5
E1347	7832.31	1.04615e+06	55.24	1	8
E1348	7401.99	5.22602e+06	55.86	6	6
E1349	18650	1.13065e+07	91.11	18	10
E1350	7237.97	3.64657e+06	96.93	29	26
E1353	13037.2	1.03302e+06	53.67	1	12
E1354	9213.86	1.79108e+06	53.79	2	6
E1355	9875.38	1.02777e+06	51.67	1	10
E1356	9396.59	1.02681e+06	83.63	1	25
E1357	7206.93	3.07874e+07	100.67	284	5
E1358	6612.46	1.0198e+06	45	1	6
E1359	4586.53	1.23454e+07	43.94	52	7
E1361	7259.81	1.01448e+06	73.91	1	18
E1362	12594.6	3.89518e+06	73.02	9	13
E1363	4533.65	1.6305e+06	31.84	3	9
E1364	18467.2	1.00636e+06	79.11	1	16
E1365	17879.7	5.80515e+06	76.73	13	15
E1366	5400.13	4.04327e+06	43.64	26	5
E1367	4555.57	1.068e+07	44.37	51	7
E1368	7473.09	4.34477e+06	92.32	6	5
E1369	10740.9	1.98243e+06	51.71	3	13
E1370	11425	1.29521e+06	98.67	2	3
E1371	6685.52	991605	55.13	1	7
E1373	9400.81	986125	83.5	1	9
E1374	13834.6	984400	47.58	1	13
E1375	7232.94	2970267	96.9	12	5
E1377	5484.85	1.18286e+06	48.5	2	6
E1378	15945.7	973970	61.73	1	10
E1379	13912.5	2.93663e+06	51.15	5	9
E1380	7275.84	2.75214e+06	95.74	9	5
E1381	17955.5	962333	66.62	1	11
E1382	7303.87	5.89053e+06	92.83	10	5
E1383	4500.39	1.58474e+06	45.07	4	3
E1384	22298.2	3.02685e+06	66.12	4	18
E1385	16579.3	946517	98.85	1	20
E1386	15427.2	941668	62.02	1	15
E1387	13469.9	4.70425e+06	70.87	12	13
E1388	14484.8	940895	56.1	1	6
E1389	10406.7	2.40426e+06	55.78	3	4
E1390	12386.8	8.96289e+06	76.37	19	13
E1391	5072.76	1.85413e+06	51.8	2	6
E1392	9406.83	1.74157e+06	85.83	3	10
E1393	8677.86	3.04854e+06	64.45	4	7
E1394	5089.46	923516	45.13	1	7
E1395	4500.56	1.57466e+06	44.58	4	7
E1396	15750.7	1.83148e+06	76.73	3	12
E1397	3945.12	5.60282e+06	45.22	31	6
E1398	6559.65	5.07539e+06	50.86	15	5
E1399	8645.7	2.01676e+06	48.96	6	7
E1400	18697.9	3.4197e+06	91.54	10	10
E1401	7512.07	2.63708e+06	49.58	4	7
E1402	11454	3.31096e+06	52.01	5	7
E1404	4569.61	1.94324e+07	45.11	70	7
E1405	13131.6	898671	52.63	1	7
E1407	8581.78	3.08432e+06	46.02	6	8
E1408	4501.61	1.6962e+06	45.05	6	5
E1409	13957.6	890741	46.94	1	13
E1410	4829.81	3.04116e+06	45.28	20	18
E1411	14101.4	882024	53.07	1	9
E1412	17919.4	876123	71.45	1	4
E1413	2922.58	1.13793e+06	28.43	2	2
E1414	11609.4	874747	49.59	1	11
E1415	4850.46	4.95377e+06	45.23	17	7
E1416	7556.87	1.2035e+07	95.37	58	5
E1417	21932.2	856152	75.42	1	6
E1418	2749.68	5.08629e+06	27.63	36	6
E1419	6511.53	847302	44.37	1	14
E1420	6479.05	845704	51.38	1	9
E1421	12371.7	5.6292e+06	73.78	14	13
E1422	4565.34	843980	32.99	1	2
E1423	4690.51	1.7254e+06	45.24	11	7
E1424	9544.12	1.44963e+06	62.83	2	9
E1425	9381.48	956525	85.23	2	8
E1426	7319.86	2.55987e+06	92.92	6	5
E1427	5670.25	1.10539e+07	26.71	130	5
E1428	10427.9	1.2732e+06	51.14	2	26
E1429	13987.4	3.82173e+06	52.8	6	10
E1430	4809.47	9.56538e+06	45.46	37	7
E1431	17831.6	2.05464e+06	66.72	3	12
E1432	6265.4	4.45062e+06	44.31	9	6
E1434	14540.8	814335	54.58	1	8
E1435	3921.22	2.36491e+06	28.36	11	3
E1436	7461.4	2.56425e+06	47.94	4	13
E1437	17709.6	798609	66.38	1	12
E1438	4861.48	6.88774e+06	45.53	29	7
E1439	5686.24	1.5313e+06	31.54	4	5
E1440	4563.65	1.95229e+06	29.47	3	7
E1441	4620.61	2.71406e+06	43.66	23	7
E1442	7826.86	7.90724e+06	96.28	24	5
E1443	10396.9	6.50801e+06	57.54	13	13
E1444	19014.5	786003	77.91	1	16
E1445	14090.2	781130	86.7	1	14
E1446	12602.8	3.19102e+06	73.11	8	13
E1447	17479.6	3.55805e+06	78.13	10	15
E1448	5892.35	2.97441e+06	27.27	11	5
E1449	6553.45	771724	45.56	1	2
E1450	12322.7	8.55195e+06	68.92	26	14
E1451	7488.41	2.04327e+06	48.18	3	14
E1452	4355.25	6.50308e+06	44.89	12	3
E1453	14659	1.94127e+06	98.59	4	22
E1454	5417.03	779245	46.94	2	3
E1455	15297.5	4.38872e+06	79.34	12	6
E1456	21757.3	759539	75.71	1	16
E1458	6361.49	1993572	45.65	7	20
E1459	7052.66	1.39306e+06	62.74	3	4
E1460	5156.85	2.10047e+06	43.73	18	6
E1461	5624.68	749494	84.43	1	6
E1462	19564.6	2.26988e+06	92.37	8	16
E1463	7222.1	2.22391e+06	97.19	9	23
E1464	5625.68	749494	84.43	1	16
E1465	10383.8	740991	51.8	1	13
E1466	6505.63	740781	50.05	1	9
E1467	6420.62	740515	27.15	1	7
E1468	7546.96	735607	58.4	1	10
E1470	8873.8	733614	65.22	1	13
E1471	5497.13	5.68586e+06	32.38	40	5
E1472	5140.8	3.74912e+06	51.6	6	5
E1473	4504.55	7.74153e+06	30.04	282	7
E1474	16049.9	3.01617e+06	76.48	7	13
E1475	16316	1.54388e+06	76.52	3	12
E1476	5325.97	1.2775e+06	45.98	5	5
E1477	21079.4	3.47894e+06	92.09	17	10
E1478	6403.48	3.10125e+06	45.09	9	6
E1479	12573.8	1.35749e+06	74.41	2	23
E1480	7636.11	707416	57.92	1	17
E1481	11783.5	7.90293e+06	67.95	21	5
E1484	18734.4	705766	78.84	1	14
E1485	22104.6	1.3676e+06	88.61	2	12
E1486	9357.05	701340	63.06	1	9
E1487	9544.84	694766	48.79	1	7
E1488	4661.33	1.02925e+06	44.49	2	2
E1489	13634.5	1.25674e+06	75.35	2	13
E1490	2864.52	2.45255e+06	45.23	15	2
E1491	10064.4	1.46864e+06	77.9	3	12
E1492	10412.9	3.17402e+06	56.8	11	13
E1493	10977.9	2.14172e+06	64.15	5	8
E1494	5140.85	2.70259e+06	29.9	13	6
E1495	9030.95	3.11645e+06	48.47	7	7
E1496	11767.5	6.95162e+07	80.48	256	5
E1497	21095.4	1.36481e+06	92.28	5	9
E1498	15018.6	674945	73.28	1	3
E1499	5875.9	671076	55.84	1	15
E1500	7489.17	670668	48.3	1	21
E1501	5928.86	667991	66.22	1	9
E1502	5619.68	665864	84.3	1	10
E1503	12840.9	1.24378e+06	69.24	2	13
E1504	14528.8	664940	55.18	1	9
E1505	3433.85	2.70744e+06	51.37	5	6
E1506	8094.07	1.31735e+06	47.46	2	26
E1507	19548.7	2.19386e+06	91.37	6	15
E1508	9292.84	662302	48.72	1	7
E1509	7371.69	661688	55.62	1	11
E1510	23068.9	657620	64.03	1	17
E1511	8208.29	1.25074e+06	55.15	2	5
E1512	17502.2	1.81523e+06	92.24	7	20
E1513	22120.6	1.74334e+06	88.67	3	12
E1514	19883.6	653496	90.98	1	8
E1516	21756.6	647861	75.71	1	9
E1517	17721.6	646679	68.35	1	9
E1518	4632.71	964142	32.4	2	4
E1519	16475.8	636314	71.38	1	8
E1520	4538.61	1.34746e+06	29.16	3	7
E1521	4877.48	3.73424e+06	45.19	20	7
E1522	7248.98	1.43967e+07	98.4	61	5
E1523	10444.7	4.06149e+07	81.88	122	8
E1525	8922.54	625997	53.39	1	6
E1526	4726.7	1.50393e+06	29.09	3	7
E1527	11559.5	1.44999e+06	51.42	3	16
E1528	9390.83	616726	83.23	1	9
E1529	14975.8	612237	60.97	1	8
E1531	8533.79	1.40207e+06	48.12	3	9
E1532	15445.7	3.72756e+06	68.64	9	16
E1534	7266.92	5.23835e+06	95.43	46	5
E1536	6907.71	1.07268e+06	52.11	6	3
E1537	4684.51	1.61564e+06	45.18	4	7
E1538	13129.3	1.20754e+06	53.79	2	11
E1539	6359.49	1.15256e+07	51.36	52	6
E1540	8235.09	1.74299e+06	48.31	4	8
E1541	6644.64	3.72484e+06	44.15	12	7
E1542	4620.66	1.14336e+06	28.69	2	7
E1543	5384.93	594235	53.72	1	9
E1546	4430.52	1.85541e+06	33.38	15	7
E1547	9729.43	587676	55.06	1	10
E1548	7974.47	1.96136e+06	48.2	5	12
E1549	11304.5	1.94271e+06	65.99	8	12
E1550	6746.53	1.83692e+06	44.87	4	6
E1551	7018.5	982756	48.45	2	7
E1554	7034.49	572566	48.26	1	7
E1555	15792.5	1.13948e+06	75.22	2	11
E1556	8165.09	1.62299e+06	47.5	3	8
E1557	4615.53	1.1995e+06	44.75	4	7
E1558	17516.9	567653	90.71	1	8
E1559	11352.8	2.38401e+06	65.83	11	7
E1560	17475.1	566355	91.83	1	20
E1561	9660.36	1.19884e+06	60.83	4	11
E1562	4109.28	2.35432e+06	45.19	31	4
E1563	12497.5	561242	72.28	1	13
E1564	17471.9	854324	89.3	5	5
E1565	9812.36	557853	50.67	1	5
E1566	3461.68	556065	47.8	1	4
E1568	9815.37	1.10406e+06	50.73	2	18
E1569	7318.88	1.05201e+06	97.12	2	5
E1571	6976.79	1.94704e+06	29.03	6	8
E1572	10036.3	549453	62.39	1	6
E1573	8547.78	1.62034e+06	46.24	5	9
E1574	12226.1	545490	64.36	1	9
E1575	6438.49	2.02175e+06	44.8	7	6
E1576	7470.88	542862	54.59	1	6
E1578	7050.49	916591	47.67	2	7
E1579	4536.54	5.53142e+06	43.96	42	7
E1582	5153.99	532918	51.6	1	7
E1583	5667.14	3.16548e+06	46.2	16	6
E1584	5959.2	775128	55.39	2	6
E1585	7995.74	527129	63.03	1	6
E1586	14673.7	1.42643e+06	98.11	10	5
E1587	6435.66	525622	53.79	1	5
E1588	4520.55	864709	32.44	23	7
E1589	10579.9	520458	53.42	1	13
E1590	11016.5	518414	65.69	1	4
E1591	8952.16	516555	62	1	7
E1592	7538.08	935442	96.77	2	22
E1593	12577.7	514174	56.66	1	13
E1594	21282.2	1.17087e+06	92.1	5	8
E1597	14089.9	511527	86.42	1	8
E1598	4463.52	1.8564e+06	32.51	27	7
E1601	17722.6	2.03356e+07	81.8	104	12
E1602	12852	505040	75.12	1	14
E1603	6718.18	627142	44.39	2	14
E1604	6456.39	2.18059e+06	45.3	7	6
E1605	11027.7	1.68312e+06	92.89	7	7
E1606	8026.48	502217	74.41	1	11
E1607	11306.5	911846	100.05	2	16
E1608	7521.08	2.03803e+06	90.79	6	5
E1609	13893.7	497715	47.56	1	26
E1610	7842.86	4.0283e+06	96.68	21	5
E1611	9381.95	497211	87	1	15
E1614	17863.7	493333	68.22	1	13
E1615	8520.03	937164	49.01	2	8
E1616	6704.8	886327	46.26	2	12
E1617	11336.8	5.23942e+06	66.2	18	7
E1618	5670.25	847151	32.72	4	5
E1619	4550.35	482485	33.13	1	2
E1620	9062.94	481453	50.07	1	26
E1621	9813.69	479569	50.53	1	8
E1622	21035.3	478570	90.61	1	6
E1623	10392.7	478288	56.03	1	17
E1624	5200.76	942253	44.58	2	4
E1625	8028.51	2.32018e+06	45.21	14	10
E1627	13367.6	474675	61.45	1	10
E1628	4539.55	740325	44.17	3	25
E1629	11558.4	703949	89.46	2	10
E1630	7550.07	1.66533e+06	95.75	5	5
E1631	5216.75	929789	44.44	2	4
E1632	6450.67	464706	49.73	1	9
E1633	22134.7	777589	71.53	2	8
E1634	4866.5	1.8475e+06	45.26	8	7
E1635	13469	461130	72.78	1	9
E1636	4747.7	460740	28.75	1	5
E1638	6669.7	454616	51.39	1	5
E1639	9414.21	776490	90.6	2	8
E1640	12667	997722	76.08	3	13
E1641	21266.2	766563	91.92	4	6
E1642	26052.4	445501	56.56	1	22
E1643	15862.7	3.67888e+07	80.75	212	11
E1644	6375.48	6.71741e+06	51.04	34	6
E1645	5088.76	438963	51.14	1	6
E1646	16082.6	438440	67.37	1	19
E1647	14491.8	438249	34.72	1	7
E1648	5538.15	1.88116e+06	31	25	5
E1649	14129.9	435313	61.98	1	15
E1652	13469.7	433151	68.91	1	17
E1653	7533.07	1.69174e+06	96.17	7	5
E1654	11319.5	813317	51.44	2	16
E1655	7237.13	975788	97.61	9	26
E1656	9388.7	425265	86.03	1	12
E1657	15461.7	3.20395e+06	69.34	10	17
E1658	4552.53	2.68551e+06	43.87	17	7
E1659	9416.79	1.6494e+06	56.53	5	5
E1660	4841.46	2.02377e+06	45.21	12	7
E1661	5514.27	1.03143e+06	27.66	3	5
E1662	7302.89	1.0283e+06	97.3	3	5
E1663	9175	416359	57.43	1	5
E1664	11597.1	416253	62.72	1	10
E1665	8703.76	1.45842e+06	45.82	4	9
E1666	8091.05	626339	47.5	2	8
E1667	6634.45	817800	45.6	2	6
E1670	21063.4	2.61312e+06	91.47	13	9
E1672	8260.13	403912	70.81	1	6
E1674	5156.85	2.84659e+06	31.87	32	6
E1675	6311.48	400902	43.97	1	6
E1676	7343.42	400645	48.76	1	14
E1677	7496.85	2.59013e+06	94.48	15	5
E1678	11611.7	395454	78.77	1	10
E1679	8198.07	394303	48.27	1	26
E1680	4763.64	700590	43.31	3	5
E1681	11783.5	2.13048e+07	81.24	143	5
E1682	5702.96	390885	51.39	1	2
E1684	13639.5	743071	90.37	2	12
E1686	4584.59	481862	30.02	6	7
E1687	15314.5	746893	78.64	3	8
E1689	7436.93	1.20267e+06	53.78	4	6
E1690	4985.83	2.34587e+06	28.8	39	7
E1692	7807.41	726545	62.59	2	6
E1693	17518.2	836312	90.6	4	18
E1694	11767.5	2.9019e+07	87.55	207	5
E1695	8564.7	732773	45.89	2	11
E1696	7209.1	999935	93.74	6	22
E1697	16062.2	383178	67.93	1	8
E1698	4579.62	1.27698e+06	30.12	11	7
E1699	12825	670159	69.99	2	13
E1700	9400.78	1.01474e+06	56.56	4	5
E1701	7253.11	1.00858e+06	96.98	7	26
E1702	8223.14	373684	74.23	1	9
E1703	19917.7	371700	93.28	1	26
E1705	6416.8	795075	45.89	4	10
E1706	7810.87	710447	95.88	2	5
E1707	3884.14	730509	51.77	3	4
E1708	19671.4	759413	77.88	3	10
E1709	18541.8	360884	82.97	1	14
E1710	5432.21	360341	27.63	1	5
E1711	6734.84	359439	44.39	1	23
E1712	3899.13	879423	51.42	3	4
E1713	3571.1	1.41513e+06	44.16	13	4
E1714	11506	759941	86.78	4	4
E1716	6896.87	1.62529e+06	44.24	7	8
E1718	11319.4	355963	57.56	1	2
E1719	11157.7	353699	65.92	1	3
E1720	7124.82	3.72278e+06	86.17	28	5
E1721	18977.4	827121	57.12	5	15
E1722	5631.28	348774	85.9	1	11
E1723	5506.16	4.68216e+06	31.13	39	5
E1724	4680.54	649370	44.06	2	7
E1725	12199.1	348434	67.43	1	9
E1726	4079.34	346770	54.12	1	5
E1727	9359.14	346197	84.17	1	8
E1728	6604.72	344627	53.66	1	5
E1729	6249.41	983041	46.23	6	6
E1730	6443.53	343470	44.51	1	6
E1731	5640.12	3.93585e+06	34.39	43	5
E1732	5501.06	5.54637e+06	29.4	76	5
E1733	7066.01	775287	46.31	4	8
E1734	21052.3	339253	88.57	1	12
E1735	15461.7	338312	74.36	1	16
E1736	15059.2	737728	67.78	3	16
E1737	6127.39	1.82671e+06	51.16	13	7
E1738	6653.77	475968	43.47	2	8
E1739	12244.6	332865	74.21	1	12
E1740	5072.9	3.23739e+06	44.92	23	9
E1741	11368.8	331280	65.48	1	7
E1743	26663.7	329327	89.69	1	8
E1744	7264.99	571547	98.92	4	26
E1745	2991.67	327321	44.72	1	4
E1746	5522.15	2.69305e+06	30.16	41	5
E1748	11682.3	433951	55.76	2	10
E1749	5175.08	634787	27.35	2	20
E1750	5648.08	320931	85.23	1	17
E1751	5529.06	1.18614e+06	43.29	10	5
E1753	12604.6	318127	76.06	1	13
E1754	5846.26	1.17535e+06	49.38	7	5
E1755	6410.46	624461	44.49	2	26
E1756	9773.32	315615	48.25	1	17
E1757	15862.7	8.08187e+06	71.48	42	11
E1758	17666.8	875894	79.27	3	15
E1759	4825.47	4.979e+06	45.34	36	7
E1760	13566.8	311738	98.86	1	4
E1761	17440.8	1.46938e+06	90.22	13	7
E1762	4397.55	3.70202e+06	44.24	27	7
E1763	7592.9	308587	57.73	1	9
E1765	6541.83	406318	46	2	11
E1767	16832.4	553498	76.09	2	12
E1768	7281.15	2.3201e+06	97.05	22	23
E1769	16184.8	300090	52.79	1	15
E1770	5455.48	1.55144e+06	27.49	9	13
E1773	5512.15	4.79347e+06	32.55	57	5
E1774	4545.6	1.41809e+06	30.43	15	7
E1776	3907.22	585334	46.27	8	3
E1779	15890.6	292853	61.21	1	11
E1780	16492.9	291902	71.59	1	7
E1781	13212.5	291862	53.07	1	8
E1782	5544.18	569700	26.12	2	5
E1783	15059.2	288698	99.93	1	15
E1784	6707.6	1.05385e+06	46.26	9	6
E1785	21083.3	288534	90.61	1	9
E1786	14888.3	718088	88.03	5	9
E1787	8996.92	1.04466e+06	55.92	8	6
E1789	11011.8	943482	92.25	5	7
E1791	16645.2	497663	76.01	2	11
E1792	26646.7	674099	88.2	3	4
E1794	5480.32	3.71585e+06	28.65	37	23
E1795	6817.72	703666	43.25	3	8
E1796	7563.11	438771	98.35	2	5
E1797	6346.78	2.96106e+06	59.03	28	12
E1799	7317.1	1.55794e+06	61.88	9	6
E1800	5635.69	279720	83.9	1	22
E1801	13469.9	1.63672e+06	79.48	16	14
E1802	17878.9	276922	77.4	1	11
E1803	10444.7	9.53589e+06	88.93	77	8
E1804	5032.45	3.48763e+06	45.53	30	7
E1805	4055.2	1.35945e+06	45.22	10	5
E1808	21067.3	270790	88.43	1	8
E1810	3953.19	889287	43.32	6	3
E1811	3587.09	1.92681e+06	44	38	4
E1812	10638.7	732404	68.2	4	4
E1813	6362.5	266443	44.91	1	26
E1814	21260.1	266235	69.49	1	15
E1815	4611.57	4.26088e+06	44.16	38	7
E1818	14081.5	264358	86.68	1	7
E1820	13990.6	261829	83.9	1	13
E1821	6198.38	4.38843e+06	98.48	36	3
E1822	8771.82	259825	55.33	1	9
E1823	27153.6	259322	90.45	1	26
E1824	7570.07	258888	95.43	1	23
E1825	17288	257869	70.42	1	6
E1826	19579.8	374507	92.92	2	10
E1827	23704.4	257365	77.78	1	2
E1828	16984	256833	69.94	1	8
E1829	7377.98	256812	71.96	1	26
E1831	8678.74	426199	45.89	2	9
E1834	5066.7	1.48933e+06	44.05	14	4
E1835	5635.17	467731	46.38	3	5
E1836	5651.16	880233	46.47	7	5
E1837	3992.24	744276	43.82	13	5
E1839	16081.3	246540	67.37	1	26
E1840	12330.7	559221	76.46	3	11
E1841	6182.44	351743	29.35	2	7
E1842	10333.7	244491	99.81	1	17
E1843	8537.9	551091	46.45	4	9
E1845	18631.9	243863	69.99	1	11
E1846	4595.58	243118	32.86	1	7
E1847	18033.7	242826	66.79	1	11
E1848	9341.37	534497	49.45	3	9
E1849	4339.25	885354	45.37	7	3
E1851	4706.5	1.72549e+06	45.25	22	7
E1852	12302.7	9.34428e+06	83.72	103	13
E1853	8017.04	239402	48.11	1	8
E1854	18713.9	601674	88.48	3	11
E1855	8709.79	238096	48.18	1	9
E1856	15445.7	237981	75.83	1	15
E1857	15863.7	7.79042e+06	86.89	81	12
E1858	6228.57	1.77042e+06	68.22	14	7
E1859	17786.5	236090	63.25	1	12
E1860	4515.65	2.48308e+06	45.59	20	9
E1862	4604.56	432906	29.38	2	7
E1863	20317.9	812124	89.75	5	6
E1864	17668.6	232169	79.22	1	20
E1865	28207.4	231836	89.15	1	3
E1867	5917.37	1.23824e+06	57.89	8	8
E1868	15066.6	229316	71.94	1	4
E1870	10332	228804	100.08	1	10
E1871	5228.8	392205	55.57	2	3
E1872	5644.07	1.93572e+06	31.02	68	5
E1873	28200.5	226229	85.23	1	26
E1874	7270.89	4.00053e+06	95.37	39	5
E1875	11384.8	697922	62.41	5	7
E1878	5913.2	223451	65.34	1	9
E1879	16487.1	223108	68.17	1	9
E1880	30998	222952	100.35	1	25
E1881	17835.5	221277	77.91	1	15
E1882	13470.7	220349	80.11	1	18
E1883	5682.29	219793	28.49	1	5
E1884	4229.28	666997	45.27	7	6
E1885	11783.5	6.99093e+06	88.42	77	4
E1886	4573.55	217930	44.24	1	26
E1887	17486.2	565199	91.77	4	18
E1888	3698.14	505437	46.26	7	6
E1890	5624.13	1.10908e+06	34.12	21	5
E1891	6333.37	215707	55.62	1	4
E1892	4562.58	359337	32.91	6	7
E1893	14491.6	214331	96.65	1	6
E1894	5501.04	471261	98.65	3	3
E1895	11458	402235	94.99	3	4
E1896	12466.5	211437	72.15	1	11
E1897	4207.25	583053	43.94	5	3
E1898	7133.55	329797	47.5	2	7
E1899	21344.4	336279	86.83	2	10
E1900	13469	344261	80.5	2	10
E1901	17863.7	388339	78	2	15
E1903	5760.16	743040	43.85	5	5
E1904	30995.4	207251	100.88	1	15
E1905	5576.3	245664	43.06	3	22
E1906	27118.6	206160	90.58	1	2
E1907	9412.53	205980	85.23	1	17
E1909	17384.6	492347	79.46	5	15
E1910	19107.6	436976	98.38	3	12
E1912	11319.5	485636	65.7	3	13
E1913	7226.86	2.46736e+06	93.1	29	5
E1914	2958.58	414226	29.16	5	26
E1915	4382.47	393033	52.86	2	4
E1916	5908.35	279311	25.32	3	5
E1917	5471.27	323320	51.43	3	20
E1918	7512.84	1.6703e+06	94.63	14	5
E1919	19794.8	197988	70.29	1	11
E1920	4516.39	196151	44.83	1	4
E1921	28000.2	261719	86.8	2	20
E1922	6551.47	645188	33.88	5	6
E1923	7140.81	1.95798e+06	86.28	25	5
E1924	2848.53	474930	45.39	3	2
E1925	6346.77	193446	100.06	1	12
E1926	7238.9	4.22453e+06	85.94	68	5
E1928	12610.6	744871	68.75	5	13
E1929	14952.3	395139	84.86	4	9
E1930	21345.3	190620	86.8	1	13
E1932	7480.85	938904	94.22	6	5
E1933	18993.3	189336	56.73	1	17
E1934	6632.56	189226	96.71	1	3
E1935	17722.6	4.46849e+06	88.56	50	12
E1936	21111.4	229679	92.74	2	9
E1937	10951.2	1.35881e+06	61.45	11	10
E1938	4877.79	350092	45.09	2	7
E1939	16742.1	184931	72.03	1	5
E1940	11304.4	354205	67.57	2	15
E1941	4277.5	868402	28.59	9	6
E1942	13901.5	182786	51.19	1	8
E1943	3693.07	710225	44.48	6	4
E1944	3369.93	355055	31.71	6	6
E1945	11264.8	180767	66.2	1	9
E1946	5140.86	446736	43.56	8	6
E1947	5444.12	180529	28.37	1	5
E1948	9884.9	179976	58.16	1	6
E1949	9224.04	735067	60.97	6	5
E1950	11131.6	414423	64.33	3	3
E1951	4763.63	1.09701e+06	33.51	13	5
E1955	5513.07	315094	32.78	2	5
E1956	31027.3	174410	99.81	1	14
E1957	7033.57	174046	85.36	1	15
E1958	9462.79	300919	56.58	2	5
E1959	9224.04	1.99571e+06	68.59	16	5
E1962	23690.4	168246	77.64	1	8
E1963	9357.38	299170	49.39	2	8
E1964	7383.9	902182	76.37	8	7
E1965	26679.7	167057	87.37	1	9
E1966	20300.9	283934	89.48	2	8
E1967	7225.92	579459	95.66	10	26
E1968	5513.07	616394	43.65	7	5
E1969	9382.95	164331	87	1	23
E1970	9445.79	163390	56.66	1	5
E1973	7286.96	299265	92.27	2	26
E1974	5772.58	878126	29.84	9	15
E1975	5484.14	1.02462e+06	26.25	16	26
E1976	2827.74	170990	29.77	2	6
E1977	13770.8	161614	64.06	1	14
E1978	10425.6	161034	69.94	1	3
E1980	30970.9	160094	100.48	1	10
E1981	6692.46	159869	45.47	1	6
E1982	11229.7	159510	92.41	1	6
E1983	11305.3	159335	68.57	1	20
E1984	5915.07	432319	44.24	3	4
E1985	6638.21	159015	99.78	1	5
E1986	17483.9	366964	92.94	4	7
E1987	9377.78	157456	86.57	1	11
E1988	6998.52	358500	45.39	3	6
E1989	4135.45	790838	44.89	7	8
E1990	4365.59	1.63069e+06	46.38	15	4
E1991	4472.56	599792	50.26	14	7
E1995	9224.05	1.02277e+07	79.9	125	5
E1996	4826.72	281565	31.25	2	7
E1997	4802.12	152600	59.59	1	7
E1998	9366.46	152291	84.83	1	19
E1999	11272.6	151839	59.07	1	9
E2000	11688	151393	99.81	1	14
E2001	11044.7	385793	93.09	3	7
E2002	4631.62	386874	45.14	3	9
E2003	5744.12	1.41488e+06	43.48	19	5
E2004	6759.18	589411	52.09	6	26
E2005	9677.38	148958	55.46	1	9
E2006	5532.12	1.25298e+06	44.93	10	9
E2007	5093.71	516253	45.44	5	3
E2008	6113.51	251476	46.28	2	6
E2010	11767.5	1.14172e+06	92.64	15	5
E2011	4424.6	145131	27.82	1	7
E2013	5400.08	381577	29.72	4	5
E2014	6022.3	393843	62.68	4	7
E2016	7325.82	142856	56.37	1	2
E2018	20333.9	336571	89.42	3	8
E2019	7858.86	1.38999e+06	94.94	18	5
E2020	12652.9	141275	76.17	1	13
E2021	4656.69	549817	45.54	6	7
E2022	4602.54	888175	43.71	9	7
E2023	3562.07	380159	44.42	5	4
E2024	28188.4	139204	88.75	1	26
E2026	7194.9	244167	89.45	2	5
E2028	17492.8	138525	92.69	1	8
E2029	5330.74	138407	89.69	1	11
E2030	21314.2	138196	91.65	1	9
E2031	7496.07	138093	49.73	1	7
E2033	7859.19	245904	96.84	2	5
E2034	8492.85	496706	51.65	4	9
E2035	17534.1	269717	89.91	3	20
E2036	13152.4	136792	57.6	1	11
E2037	5385.12	136623	44.2	1	5
E2039	6799.87	135314	48.1	1	9
E2040	14637.8	183790	98.48	3	4
E2041	5501.13	261101	42.93	4	26
E2042	9370.2	339100	46.99	6	10
E2043	14936.3	463534	85.6	6	8
E2045	4536.55	133591	32.86	1	7
E2046	10548.5	392326	54.07	4	6
E2047	17401.4	133380	78.28	1	19
E2048	4893.51	2.37944e+06	45.4	31	7
E2049	9944.38	208191	60.81	2	11
E2050	5773.62	302838	30.29	3	20
E2051	14690.1	132839	97.25	1	21
E2052	17548.9	131751	92.69	1	7
E2054	8236.84	320486	51.97	3	4
E2055	13976.5	247487	50.85	2	8
E2056	10756.6	129553	51.99	1	8
E2057	11304.4	718436	77.65	9	14
E2058	5644.28	228884	87.18	2	5
E2059	10329.3	128490	100.48	1	9
E2060	10556.5	343382	53.74	3	5
E2061	5610.24	251418	45.58	2	7
E2062	12275.7	347575	81.71	4	13
E2063	6416.33	182670	57.2	2	3
E2064	15098.6	126870	70.59	1	4
E2066	4547.67	223009	45.56	2	9
E2067	5932.4	230951	27.71	5	8
E2068	21520.1	126324	88.53	1	11
E2069	5373.14	125628	27.68	1	5
E2071	5896.27	328291	100.71	3	4
E2072	18145.8	124396	76.46	1	15
E2074	14095.2	124091	86.97	1	13
E2075	22135.6	123839	88.54	1	13
E2076	18678	123597	92.72	1	12
E2078	5547.31	122827	43.64	1	22
E2079	5924.36	884730	25.97	13	5
E2080	5647.69	122581	85.23	1	22
E2081	7097.98	122418	28.64	1	8
E2083	9593.1	119567	63	1	9
E2084	8764.94	119215	101.4	1	5
E2085	6477.68	465650	53.82	5	5
E2088	8451.39	210282	57.18	2	4
E2089	6347.78	3.90468e+06	68.66	102	12
E2091	8267.32	116046	87.1	1	9
E2092	5495.14	568441	43.7	8	5
E2093	3973.46	199265	29.61	2	9
E2094	10336	115574	100.09	1	8
E2095	5686.1	223823	99.13	2	3
E2096	5793.18	183433	26	2	5
E2097	19687.4	114990	77.4	1	10
E2098	4598.64	199728	45.08	2	7
E2099	16067.3	114858	75.6	1	16
E2100	9401.66	114717	88.29	1	13
E2101	18571.8	114658	81.09	1	10
E2102	17458.9	114266	91.85	1	26
E2103	3955.45	113949	29.53	1	9
E2104	4347.36	113701	33.88	1	3
E2105	4129.42	323661	28.95	10	5
E2106	11127.6	113006	63.77	1	2
E2107	6037.27	158771	63.27	2	7
E2108	9586.35	169238	60.9	2	11
E2109	3849.96	112705	45.54	1	4
E2110	7282.59	222743	46.42	2	7
E2111	4727.56	314256	44.97	4	7
E2112	9224.05	6.40943e+06	87.55	109	5
E2113	7287.14	300177	96.52	3	25
E2115	28206.5	109577	87.62	1	25
E2116	11046	108335	90.7	1	22
E2117	5020.84	314795	54.97	5	5
E2118	5509.01	325228	45.75	4	4
E2120	5927.29	645036	100.32	7	4
E2121	25703.7	105305	88.68	1	2
E2123	11165.5	104939	65.8	1	2
E2125	10100.2	203109	80.7	2	12
E2126	4743.59	103475	29.69	1	7
E2127	3938.45	102716	29.53	1	9
E2129	3707.94	444493	48.02	6	4
E2130	16620	170029	70.75	2	20
E2131	7579.44	101975	102.06	1	6
E2132	11273.4	101772	58.93	1	13
E2133	7579.09	101272	97.84	1	6
E2136	5497.08	297860	44	5	5
E2137	15830.7	98355.2	71.42	1	11
E2138	9340.08	97702.4	86.74	1	15
E2139	15862.7	353483	87.5	7	9
E2140	2895.72	282993	45.4	3	3
E2142	7037.85	97118.9	86.73	1	15
E2143	3367.88	533510	43.99	8	3
E2144	17564.9	96808.1	88.72	1	8
E2145	12302.7	2.75839e+06	90.6	54	13
E2147	3948.36	139860	44.78	2	23
E2149	4616.72	186045	30.67	2	4
E2150	4943.62	184422	31.25	2	7
E2151	6472.85	94981.1	46.23	1	12
E2152	6214.38	94556.4	95.82	1	3
E2155	5832.1	93654.1	42.95	1	5
E2156	9224.05	1.26024e+06	92.43	28	5
E2157	4575.43	181759	45.33	3	7
E2158	21535.1	92805.8	88.39	1	11
E2159	4616.72	179699	43.66	2	4
E2161	18680	92174.5	68.78	1	11
E2162	8893.91	91977.4	89.82	1	11
E2163	5035.93	472647	45.2	7	5
E2164	5050.7	91448.1	32	1	4
E2165	7291.15	91441.1	99.31	1	22
E2166	3925.38	398548	26.31	7	5
E2167	3953.19	252739	34.74	5	3
E2169	21050.3	90589	90.7	1	9
E2171	21298.2	185507	92.99	3	6
E2172	7339.68	236257	56.28	3	7
E2174	4064.24	298825	45.05	6	5
E2175	4129.42	88645.8	43.03	1	5
E2178	4445.53	88215.7	27.95	1	7
E2179	4670.53	286625	45.28	4	7
E2180	4724.45	263548	54.5	4	2
E2181	12331.7	87839.1	76.77	1	14
E2182	18694	87573	92.66	1	11
E2183	9708.31	139128	47.84	2	20
E2184	4542.5	230983	43.7	4	2
E2185	7209.91	87208.4	96.92	1	26
E2186	6974.89	330556	52.96	5	4
E2187	7372.01	222238	66.73	3	4
E2188	3923.46	86631.1	43.06	1	9
E2190	28141.5	86383.1	87.27	1	25
E2191	5596.05	273871	50.71	4	7
E2192	5384.14	143499	30.26	2	5
E2194	6346.78	7.12909e+06	77.9	191	12
E2195	14124.4	146966	56.72	2	9
E2196	5048.44	508143	45.32	8	7
E2197	7225.1	98924.4	92.24	2	22
E2198	5700.11	83462	43.93	1	5
E2199	5448.33	83372.9	44.05	1	23
E2202	6968.7	313382	79.35	4	5
E2203	5406.07	431479	44.49	7	6
E2205	8517.86	81018.9	46.5	1	9
E2206	5631.17	349242	43.56	5	5
E2207	4632.72	144970	26.54	2	4
E2208	11320.5	683034	80.7	13	14
E2209	7222.9	2.38339e+06	86.98	68	5
E2210	12291.7	195263	78.71	4	13
E2211	4493.52	826663	50.87	21	7
E2213	8182.48	78123	81.59	1	11
E2214	20034.8	77910.9	61.95	1	16
E2215	8098.13	77839.6	71.6	1	6
E2216	10178.6	77567.8	68.4	1	5
E2217	3925.38	829977	43.38	24	5
E2218	12261.7	77212.6	92.36	1	13
E2219	11060.1	76627.7	92.24	1	26
E2220	16168	76244.8	53.06	1	6
E2222	22086.5	75585.8	88.54	1	13
E2224	15011.3	225381	79.89	4	14
E2225	3341.91	123182	29.82	2	5
E2227	7282.94	204474	96.39	3	2
[truncated: 246 more rows]

## Sheet: T S-3
SI Table S-3	Catalog of Theoretical Proteoforms Built from the E. coli UniProt XML Database (5,657 Entries)
Gene Name	Fragment	Begin	End	Unmodified Mass	PTM Mass	PTM description	Accession	Modified mass	Lysine Count	Description
3MG1_ECOLI	full	1	187	21630.7	0	Unmodified	P05100_1full187_1G_P1_1T	21630.7	11	P05100_1full187_1G|3MG1_ECOLI|DNA-3-methyladenine glycosylase 1_P1
3MG2_ECOLI	full	1	282	31665.3	0	Unmodified	P04395_1full282_1G_P1_1T	31665.3	8	P04395_1full282_1G|3MG2_ECOLI|DNA-3-methyladenine glycosylase 2_P1
3PASE_ECOLI	full	1	433	48666.2	0	Unmodified	P30871_1full433_1G_P1_1T	48666.2	17	P30871_1full433_1G|3PASE_ECOLI|Inorganic triphosphatase_P1
5DNU_ECOLI	full	1	199	22903.8	0	Unmodified	P76491_1full199_1G_P1_1T	22903.8	12	P76491_1full199_1G|5DNU_ECOLI|5'-deoxynucleotidase YfbR_P1
5FCL_ECOLI	full	1	182	21197	0	Unmodified	P0AC28_1full182_1G_P1_1T	21197	6	P0AC28_1full182_1G|5FCL_ECOLI|5-formyltetrahydrofolate cyclo-ligase_P1
6PGD_ECOLI	full	1	468	51787.8	0	Unmodified	P00350_1full468_1G_P1_1T	51787.8	28	P00350_1full468_1G|6PGD_ECOLI|6-phosphogluconate dehydrogenase, decarboxylating_P1
6PGL_ECOLI	full	1	331	36634.1	0	Unmodified	P52697_1full331_1G_P1_1T	36634.1	8	P52697_1full331_1G|6PGL_ECOLI|6-phosphogluconolactonase_P1
AAEA_ECOLI	full	1	310	34873.4	0	Unmodified	P46482_1full310_1G_P1_1T	34873.4	15	P46482_1full310_1G|AAEA_ECOLI|p-hydroxybenzoic acid efflux pump subunit AaeA_P1
AAEB_ECOLI	full	1	655	74315.6	0	Unmodified	P46481_1full655_1G_P1_1T	74315.6	18	P46481_1full655_1G|AAEB_ECOLI|p-hydroxybenzoic acid efflux pump subunit AaeB_P1
AAER_ECOLI	full	1	309	34777.2	0	Unmodified	P67662_1full309_1G_P1_1T	34777.2	14	P67662_1full309_1G|AAER_ECOLI|HTH-type transcriptional activator AaeR_P1
AAEX_ECOLI	full	1	67	7955.32	0	Unmodified	P46478_1full67_1G_P1_1T	7955.32	0	P46478_1full67_1G|AAEX_ECOLI|Protein AaeX_P1
AAS_ECOLI	full	1	719	81181.2	0	Unmodified	P31119_1full719_1G_P1_1T	81181.2	38	P31119_1full719_1G|AAS_ECOLI|Bifunctional protein Aas_P1
AAT_ECOLI	full	1	396	43975.4	0	Unmodified	P00509_1full396_1G_P1_1T	43975.4	18	P00509_1full396_1G|AAT_ECOLI|Aspartate aminotransferase_P1
ABDH_ECOLI	full	1	474	51405.4	0	Unmodified	P77674_1full474_1G_P1_1T	51405.4	26	P77674_1full474_1G|ABDH_ECOLI|Gamma-aminobutyraldehyde dehydrogenase_P1
ABGA_ECOLI	full	1	436	46786.2	0	Unmodified	P77357_1full436_1G_P1_1T	46786.2	7	P77357_1full436_1G|ABGA_ECOLI|p-aminobenzoyl-glutamate hydrolase subunit A_P1
ABGB_ECOLI	full	1	481	52794.1	0	Unmodified	P76052_1full481_1G_P1_1T	52794.1	15	P76052_1full481_1G|ABGB_ECOLI|p-aminobenzoyl-glutamate hydrolase subunit B_P1
ABGR_ECOLI	full	1	302	34409.6	0	Unmodified	P77744_1full302_1G_P1_1T	34409.6	11	P77744_1full302_1G|ABGR_ECOLI|HTH-type transcriptional regulator AbgR_P1
ABGT_ECOLI	full	1	508	55067.9	0	Unmodified	P46133_1full508_1G_P1_1T	55067.9	13	P46133_1full508_1G|ABGT_ECOLI|p-aminobenzoyl-glutamate transport protein_P1
ABRB_ECOLI	full	1	348	37103.2	0	Unmodified	P75747_1full348_1G_P1_1T	37103.2	2	P75747_1full348_1G|ABRB_ECOLI|Protein AbrB_P1
ACCA_ECOLI	chain	2	319	35338.5	0	Unmodified	P0ABD5_2frag319_1G_P1_1T	35338.5	17	P0ABD5_2frag319_1G|ACCA_ECOLI|Acetyl-coenzyme A carboxylase carboxyl transferase subunit alpha_P1
ACCA_ECOLI	full	1	319	35469.6	0	Unmodified	P0ABD5_1full319_1G_P1_1T	35469.6	17	P0ABD5_1full319_1G|ACCA_ECOLI|Acetyl-coenzyme A carboxylase carboxyl transferase subunit alpha_P1
ACCC_ECOLI	full	1	449	49945.8	0	Unmodified	P24182_1full449_1G_P1_1T	49945.8	25	P24182_1full449_1G|ACCC_ECOLI|Biotin carboxylase_P1
ACCD_ECOLI	full	1	304	33794.5	0	Unmodified	P0A9Q5_1full304_1G_P1_1T	33794.5	19	P0A9Q5_1full304_1G|ACCD_ECOLI|Acetyl-coenzyme A carboxylase carboxyl transferase subunit beta_P1
ACDH_ECOLI	full	1	316	33639.4	0	Unmodified	P77580_1full316_1G_P1_1T	33639.4	13	P77580_1full316_1G|ACDH_ECOLI|Acetaldehyde dehydrogenase_P1
ACEA_ECOLI	chain	2	434	47814	0	Unmodified	P0A9G6_2frag434_1G_P1_1T	47814	21	P0A9G6_2frag434_1G|ACEA_ECOLI|Isocitrate lyase_P1
ACEA_ECOLI	full	1	434	47945	0	Unmodified	P0A9G6_1full434_1G_P1_1T	47945	21	P0A9G6_1full434_1G|ACEA_ECOLI|Isocitrate lyase_P1
ACEK_ECOLI	full	1	578	68239.8	0	Unmodified	P11071_1full578_1G_P1_1T	68239.8	16	P11071_1full578_1G|ACEK_ECOLI|Isocitrate dehydrogenase kinase/phosphatase_P1
ACFD_ECOLI	signal-peptide	1	23	2548.56	0	Unmodified	P0CK95_1frag23_1G_P1_1T	2548.56	5	P0CK95_1frag23_1G|ACFD_ECOLI|Putative lipoprotein AcfD homolog_P1
ACFD_ECOLI	chain	24	1520	166196	0	Unmodified	P0CK95_24frag1520_1G_P1_1T	166196	86	P0CK95_24frag1520_1G|ACFD_ECOLI|Putative lipoprotein AcfD homolog_P1
ACFD_ECOLI	full	1	1520	168726	0	Unmodified	P0CK95_1full1520_1G_P1_1T	168726	91	P0CK95_1full1520_1G|ACFD_ECOLI|Putative lipoprotein AcfD homolog_P1
ACKA_ECOLI	full	1	400	43789.5	0	Unmodified	P0A6A3_1full400_1G_P1_1T	43789.5	23	P0A6A3_1full400_1G|ACKA_ECOLI|Acetate kinase_P1
ACNA_ECOLI	chain	2	891	98228.5	0	Unmodified	P25516_2frag891_1G_P1_1T	98228.5	43	P25516_2frag891_1G|ACNA_ECOLI|Aconitate hydratase A_P1
ACNA_ECOLI	full	1	891	98359.5	0	Unmodified	P25516_1full891_1G_P1_1T	98359.5	43	P25516_1full891_1G|ACNA_ECOLI|Aconitate hydratase A_P1
ACNB_ECOLI	full	1	865	94401.9	0	Unmodified	P36683_1full865_1G_P1_1T	94401.9	49	P36683_1full865_1G|ACNB_ECOLI|Aconitate hydratase B_P1
ACOCT_ECOLI	full	1	381	42114.3	0	Unmodified	P76518_1full381_1G_P1_1T	42114.3	16	P76518_1full381_1G|ACOCT_ECOLI|Acetyl-CoA:oxalate CoA-transferase_P1
ACP_ECOLI	chain	2	78	8535.24	0	Unmodified	P0A6A8_2frag78_1G_P1_1T	8535.24	4	P0A6A8_2frag78_1G|ACP_ECOLI|Acyl carrier protein_P1
ACP_ECOLI	full	1	78	8666.28	0	Unmodified	P0A6A8_1full78_1G_P1_1T	8666.28	4	P0A6A8_1full78_1G|ACP_ECOLI|Acyl carrier protein_P1
ACPH_ECOLI	full	1	193	23011.4	0	Unmodified	P21515_1full193_1G_P1_1T	23011.4	1	P21515_1full193_1G|ACPH_ECOLI|Acyl carrier protein phosphodiesterase_P1
ACPS_ECOLI	chain	2	126	14025.6	0	Unmodified	P24224_2frag126_1G_P1_1T	14025.6	7	P24224_2frag126_1G|ACPS_ECOLI|Holo-[acyl-carrier-protein] synthase_P1
ACPS_ECOLI	full	1	126	14156.6	0	Unmodified	P24224_1full126_1G_P1_1T	14156.6	7	P24224_1full126_1G|ACPS_ECOLI|Holo-[acyl-carrier-protein] synthase_P1
ACPT_ECOLI	full	1	195	21957.2	0	Unmodified	P37623_1full195_1G_P1_1T	21957.2	4	P37623_1full195_1G|ACPT_ECOLI|4'-phosphopantetheinyl transferase AcpT_P1
ACRA_ECOLI	signal-peptide	1	24	2497.36	0	Unmodified	P0AE06_1frag24_1G_P1_1T	2497.36	1	P0AE06_1frag24_1G|ACRA_ECOLI|Multidrug efflux pump subunit AcrA_P1
ACRA_ECOLI	chain	25	397	39933.1	0	Unmodified	P0AE06_25frag397_1G_P1_1T	39933.1	22	P0AE06_25frag397_1G|ACRA_ECOLI|Multidrug efflux pump subunit AcrA_P1
ACRA_ECOLI	full	1	397	42412.4	0	Unmodified	P0AE06_1full397_1G_P1_1T	42412.4	23	P0AE06_1full397_1G|ACRA_ECOLI|Multidrug efflux pump subunit AcrA_P1
ACRB_ECOLI	full	1	1049	113960	0	Unmodified	P31224_1full1049_1G_P1_1T	113960	43	P31224_1full1049_1G|ACRB_ECOLI|Multidrug efflux pump subunit AcrB_P1
ACRD_ECOLI	full	1	1037	113484	0	Unmodified	P24177_1full1037_1G_P1_1T	113484	35	P24177_1full1037_1G|ACRD_ECOLI|Probable aminoglycoside efflux pump_P1
ACRE_ECOLI	signal-peptide	1	23	2524.45	0	Unmodified	P24180_1frag23_1G_P1_1T	2524.45	1	P24180_1frag23_1G|ACRE_ECOLI|Multidrug export protein AcrE_P1
ACRE_ECOLI	chain	24	385	39011.4	0	Unmodified	P24180_24frag385_1G_P1_1T	39011.4	20	P24180_24frag385_1G|ACRE_ECOLI|Multidrug export protein AcrE_P1
ACRE_ECOLI	full	1	385	41517.8	0	Unmodified	P24180_1full385_1G_P1_1T	41517.8	21	P24180_1full385_1G|ACRE_ECOLI|Multidrug export protein AcrE_P1
ACRF_ECOLI	full	1	1034	111883	0	Unmodified	P24181_1full1034_1G_P1_1T	111883	41	P24181_1full1034_1G|ACRF_ECOLI|Multidrug export protein AcrF_P1
ACRR_ECOLI	full	1	215	25067	0	Unmodified	P0ACS9_1full215_1G_P1_1T	25067	11	P0ACS9_1full215_1G|ACRR_ECOLI|HTH-type transcriptional regulator AcrR_P1
ACRZ_ECOLI	full	1	49	5320.96	0	Unmodified	P0AAW9_1full49_1G_P1_1T	5320.96	3	P0AAW9_1full49_1G|ACRZ_ECOLI|Multidrug efflux pump accessory protein AcrZ_P1
ACSA_ECOLI	full	1	652	72711.9	0	Unmodified	P27550_1full652_1G_P1_1T	72711.9	33	P27550_1full652_1G|ACSA_ECOLI|Acetyl-coenzyme A synthetase_P1
ACTP_ECOLI	full	1	549	59400.7	0	Unmodified	P32705_1full549_1G_P1_1T	59400.7	16	P32705_1full549_1G|ACTP_ECOLI|Cation/acetate symporter ActP_P1
ACUI_ECOLI	full	1	324	34977.1	0	Unmodified	P26646_1full324_1G_P1_1T	34977.1	13	P26646_1full324_1G|ACUI_ECOLI|Probable acrylyl-CoA reductase AcuI_P1
ACYP_ECOLI	full	1	92	10447.4	0	Unmodified	P0AB65_1full92_1G_P1_1T	10447.4	5	P0AB65_1full92_1G|ACYP_ECOLI|Acylphosphatase_P1
ADA_ECOLI	full	1	354	40095.4	0	Unmodified	P06134_1full354_1G_P1_1T	40095.4	14	P06134_1full354_1G|ADA_ECOLI|Bifunctional transcriptional activator/DNA repair enzyme Ada_P1
ADD_ECOLI	full	1	333	36666.9	0	Unmodified	P22333_1full333_1G_P1_1T	36666.9	8	P22333_1full333_1G|ADD_ECOLI|Adenosine deaminase_P1
ADEC_ECOLI	full	1	588	64422.6	0	Unmodified	P31441_1full588_1G_P1_1T	64422.6	12	P31441_1full588_1G|ADEC_ECOLI|Adenine deaminase_P1
ADEP_ECOLI	full	1	445	47070.1	0	Unmodified	P31466_1full445_1G_P1_1T	47070.1	8	P31466_1full445_1G|ADEP_ECOLI|Adenine permease AdeP_P1
ADEQ_ECOLI	full	1	444	47316.9	0	Unmodified	P31440_1full444_1G_P1_1T	47316.9	9	P31440_1full444_1G|ADEQ_ECOLI|Adenine permease AdeQ_P1
ADH2_ECOLI	full	1	383	40917.6	0	Unmodified	P37686_1full383_1G_P1_1T	40917.6	17	P37686_1full383_1G|ADH2_ECOLI|Probable alcohol dehydrogenase_P1
ADHE_ECOLI	chain	2	891	96969.7	0	Unmodified	P0A9Q7_2frag891_1G_P1_1T	96969.7	65	P0A9Q7_2frag891_1G|ADHE_ECOLI|Aldehyde-alcohol dehydrogenase_P1
ADHE_ECOLI	full	1	891	97100.8	0	Unmodified	P0A9Q7_1full891_1G_P1_1T	97100.8	65	P0A9Q7_1full891_1G|ADHE_ECOLI|Aldehyde-alcohol dehydrogenase_P1
ADHP_ECOLI	full	1	336	36046.6	0	Unmodified	P39451_1full336_1G_P1_1T	36046.6	22	P39451_1full336_1G|ADHP_ECOLI|Alcohol dehydrogenase, propanol-preferring_P1
ADIA_ECOLI	full	1	755	85173.8	0	Unmodified	P28629_1full755_1G_P1_1T	85173.8	29	P28629_1full755_1G|ADIA_ECOLI|Biodegradative arginine decarboxylase_P1
ADIC_ECOLI	full	1	445	47372.1	0	Unmodified	P60061_1full445_1G_P1_1T	47372.1	13	P60061_1full445_1G|ADIC_ECOLI|Arginine/agmatine antiporter_P1
ADIY_ECOLI	full	1	253	29621	0	Unmodified	P33234_1full253_1G_P1_1T	29621	15	P33234_1full253_1G|ADIY_ECOLI|HTH-type transcriptional regulator AdiY_P1
ADPP_ECOLI	full	1	209	23700.2	0	Unmodified	Q93K97_1full209_1G_P1_1T	23700.2	6	Q93K97_1full209_1G|ADPP_ECOLI|ADP-ribose pyrophosphatase_P1
ADRA_ECOLI	full	1	371	41769.9	0	Unmodified	P0AAP1_1full371_1G_P1_1T	41769.9	11	P0AAP1_1full371_1G|ADRA_ECOLI|Probable diguanylate cyclase AdrA_P1
ADRB_ECOLI	full	1	532	60128.1	0	Unmodified	P76261_1full532_1G_P1_1T	60128.1	14	P76261_1full532_1G|ADRB_ECOLI|Putative cyclic-di-GMP phosphodiesterase AdrB_P1
AEEP_ECOLI	full	1	321	35139.2	0	Unmodified	P51981_1full321_1G_P1_1T	35139.2	11	P51981_1full321_1G|AEEP_ECOLI|L-Ala-D/L-Glu epimerase_P1
AEGA_ECOLI	full	1	659	73610.6	0	Unmodified	P37127_1full659_1G_P1_1T	73610.6	27	P37127_1full659_1G|AEGA_ECOLI|Protein AegA_P1
AER_ECOLI	full	1	506	55378.7	0	Unmodified	P50466_1full506_1G_P1_1T	55378.7	22	P50466_1full506_1G|AER_ECOLI|Aerotaxis receptor_P1
AES_ECOLI	full	1	319	36531	0	Unmodified	P23872_1full319_1G_P1_1T	36531	8	P23872_1full319_1G|AES_ECOLI|Acetyl esterase_P1
AFUB_ECOLI	full	1	120	13109.3	0	Unmodified	P75681_1full120_1G_P1_1T	13109.3	3	P75681_1full120_1G|AFUB_ECOLI|Putative ferric transport system permease-like protein AfuB_P1
AG43_ECOLI	signal-peptide	1	52	5634.08	0	Unmodified	P39180_1frag52_1G_P1_1T	5634.08	2	P39180_1frag52_1G|AG43_ECOLI|Antigen 43_P1
AG43_ECOLI	chain	53	551	49870	0	Unmodified	P39180_53frag551_1G_P1_1T	49870	14	P39180_53frag551_1G|AG43_ECOLI|Antigen 43_P1
AG43_ECOLI	chain	552	1039	51558.4	0	Unmodified	P39180_552frag1039_1G_P1_1T	51558.4	10	P39180_552frag1039_1G|AG43_ECOLI|Antigen 43_P1
AG43_ECOLI	chain	53	1039	101410	0	Unmodified	P39180_53frag1039_1G_P1_1T	101410	24	P39180_53frag1039_1G|AG43_ECOLI|Antigen 43_P1
AG43_ECOLI	full	1	1039	107026	0	Unmodified	P39180_1full1039_1G_P1_1T	107026	26	P39180_1full1039_1G|AG43_ECOLI|Antigen 43_P1
AGAA_ECOLI	full	1	167	17881.9	0	Unmodified	P42906_1full167_1G_P1_1T	17881.9	4	P42906_1full167_1G|AGAA_ECOLI|Putative N-acetylgalactosamine-6-phosphate deacetylase_P1
AGAI_ECOLI	full	1	251	28128.7	0	Unmodified	P42912_1full251_1G_P1_1T	28128.7	10	P42912_1full251_1G|AGAI_ECOLI|Putative galactosamine-6-phosphate isomerase_P1
AGAL_ECOLI	full	1	451	51468.8	0	Unmodified	P06720_1full451_1G_P1_1T	51468.8	20	P06720_1full451_1G|AGAL_ECOLI|Alpha-galactosidase_P1
AGAR_ECOLI	full	1	269	29740.3	0	Unmodified	P0ACK2_1full269_1G_P1_1T	29740.3	9	P0ACK2_1full269_1G|AGAR_ECOLI|Putative aga operon transcriptional repressor_P1
AGAS_ECOLI	full	1	384	42089.2	0	Unmodified	P42907_1full384_1G_P1_1T	42089.2	6	P42907_1full384_1G|AGAS_ECOLI|Putative tagatose-6-phosphate ketose/aldose isomerase_P1
AGP_ECOLI	signal-peptide	1	22	2147.22	0	Unmodified	P19926_1frag22_1G_P1_1T	2147.22	1	P19926_1frag22_1G|AGP_ECOLI|Glucose-1-phosphatase_P1
AGP_ECOLI	chain	23	413	44083.2	0	Unmodified	P19926_23frag413_1G_P1_1T	44083.2	26	P19926_23frag413_1G|AGP_ECOLI|Glucose-1-phosphatase_P1
AGP_ECOLI	full	1	413	46212.4	0	Unmodified	P19926_1full413_1G_P1_1T	46212.4	27	P19926_1full413_1G|AGP_ECOLI|Glucose-1-phosphatase_P1
AHPC_ECOLI	chain	2	187	20843.6	0	Unmodified	P0AE08_2frag187_1G_P1_1T	20843.6	14	P0AE08_2frag187_1G|AHPC_ECOLI|Alkyl hydroperoxide reductase subunit C_P1
AHPC_ECOLI	full	1	187	20974.7	0	Unmodified	P0AE08_1full187_1G_P1_1T	20974.7	14	P0AE08_1full187_1G|AHPC_ECOLI|Alkyl hydroperoxide reductase subunit C_P1
AHPF_ECOLI	full	1	521	56764.7	0	Unmodified	P35340_1full521_1G_P1_1T	56764.7	35	P35340_1full521_1G|AHPF_ECOLI|Alkyl hydroperoxide reductase subunit F_P1
AHR_ECOLI	full	1	339	37046.8	0	Unmodified	P27250_1full339_1G_P1_1T	37046.8	14	P27250_1full339_1G|AHR_ECOLI|Aldehyde reductase Ahr_P1
AIDB_ECOLI	full	1	541	61339.2	0	Unmodified	P33224_1full541_1G_P1_1T	61339.2	13	P33224_1full541_1G|AIDB_ECOLI|Putative acyl-CoA dehydrogenase AidB_P1
AIS_ECOLI	signal-peptide	1	25	2817.68	0	Unmodified	P45565_1frag25_1G_P1_1T	2817.68	3	P45565_1frag25_1G|AIS_ECOLI|Lipopolysaccharide core heptose(II)-phosphate phosphatase_P1
AIS_ECOLI	chain	26	200	19864.2	0	Unmodified	P45565_26frag200_1G_P1_1T	19864.2	14	P45565_26frag200_1G|AIS_ECOLI|Lipopolysaccharide core heptose(II)-phosphate phosphatase_P1
AIS_ECOLI	full	1	200	22663.9	0	Unmodified	P45565_1full200_1G_P1_1T	22663.9	17	P45565_1full200_1G|AIS_ECOLI|Lipopolysaccharide core heptose(II)-phosphate phosphatase_P1
AK1H_ECOLI	full	1	820	90020.5	0	Unmodified	P00561_1full820_1G_P1_1T	90020.5	34	P00561_1full820_1G|AK1H_ECOLI|Bifunctional aspartokinase/homoserine dehydrogenase 1_P1
AK2H_ECOLI	chain	2	810	89375.1	0	Unmodified	P00562_2frag810_1G_P1_1T	89375.1	20	P00562_2frag810_1G|AK2H_ECOLI|Bifunctional aspartokinase/homoserine dehydrogenase 2_P1
AK2H_ECOLI	full	1	810	89506.1	0	Unmodified	P00562_1full810_1G_P1_1T	89506.1	20	P00562_1full810_1G|AK2H_ECOLI|Bifunctional aspartokinase/homoserine dehydrogenase 2_P1
AK3_ECOLI	chain	2	449	48743.7	0	Unmodified	P08660_2frag449_1G_P1_1T	48743.7	11	P08660_2frag449_1G|AK3_ECOLI|Lysine-sensitive aspartokinase 3_P1
AK3_ECOLI	full	1	449	48874.7	0	Unmodified	P08660_1full449_1G_P1_1T	48874.7	11	P08660_1full449_1G|AK3_ECOLI|Lysine-sensitive aspartokinase 3_P1
ALAA_ECOLI	full	1	405	45949.8	0	Unmodified	P0A959_1full405_1G_P1_1T	45949.8	22	P0A959_1full405_1G|ALAA_ECOLI|Glutamate-pyruvate aminotransferase AlaA_P1
ALAC_ECOLI	full	1	412	46575.1	0	Unmodified	P77434_1full412_1G_P1_1T	46575.1	20	P77434_1full412_1G|ALAC_ECOLI|Glutamate-pyruvate aminotransferase AlaC_P1
ALAE_ECOLI	full	1	149	17140.8	0	Unmodified	P64550_1full149_1G_P1_1T	17140.8	4	P64550_1full149_1G|ALAE_ECOLI|L-alanine exporter AlaE_P1
ALDA_ECOLI	chain	2	479	52456.1	0	Unmodified	P25553_2frag479_1G_P1_1T	52456.1	22	P25553_2frag479_1G|ALDA_ECOLI|Lactaldehyde dehydrogenase_P1
ALDA_ECOLI	full	1	479	52587.1	0	Unmodified	P25553_1full479_1G_P1_1T	52587.1	22	P25553_1full479_1G|ALDA_ECOLI|Lactaldehyde dehydrogenase_P1
ALDB_ECOLI	full	1	512	56870	0	Unmodified	P37685_1full512_1G_P1_1T	56870	25	P37685_1full512_1G|ALDB_ECOLI|Aldehyde dehydrogenase B_P1
ALF_ECOLI	chain	2	359	39420	0	Unmodified	P0AB71_2frag359_1G_P1_1T	39420	25	P0AB71_2frag359_1G|ALF_ECOLI|Fructose-bisphosphate aldolase class 2_P1
ALF_ECOLI	full	1	359	39551	0	Unmodified	P0AB71_1full359_1G_P1_1T	39551	25	P0AB71_1full359_1G|ALF_ECOLI|Fructose-bisphosphate aldolase class 2_P1
ALF1_ECOLI	chain	2	350	38302.4	0	Unmodified	P0A991_2frag350_1G_P1_1T	38302.4	15	P0A991_2frag350_1G|ALF1_ECOLI|Fructose-bisphosphate aldolase class 1_P1
ALF1_ECOLI	full	1	350	38433.5	0	Unmodified	P0A991_1full350_1G_P1_1T	38433.5	15	P0A991_1full350_1G|ALF1_ECOLI|Fructose-bisphosphate aldolase class 1_P1
ALKB_ECOLI	full	1	216	24352.4	0	Unmodified	P05050_1full216_1G_P1_1T	24352.4	8	P05050_1full216_1G|ALKB_ECOLI|Alpha-ketoglutarate-dependent dioxygenase AlkB_P1
ALKH_ECOLI	full	1	213	22545.1	0	Unmodified	P0A955_1full213_1G_P1_1T	22545.1	13	P0A955_1full213_1G|ALKH_ECOLI|KHG/KDPG aldolase_P1
ALLA_ECOLI	full	1	160	18353.2	0	Unmodified	P77731_1full160_1G_P1_1T	18353.2	3	P77731_1full160_1G|ALLA_ECOLI|Ureidoglycolate lyase_P1
ALLB_ECOLI	full	1	453	50462.4	0	Unmodified	P77671_1full453_1G_P1_1T	50462.4	26	P77671_1full453_1G|ALLB_ECOLI|Allantoinase_P1
ALLC_ECOLI	full	1	411	46241.1	0	Unmodified	P77425_1full411_1G_P1_1T	46241.1	15	P77425_1full411_1G|ALLC_ECOLI|Allantoate amidohydrolase_P1
ALLD_ECOLI	full	1	349	38210.2	0	Unmodified	P77555_1full349_1G_P1_1T	38210.2	12	P77555_1full349_1G|ALLD_ECOLI|Ureidoglycolate dehydrogenase (NAD(+))_P1
ALLE_ECOLI	full	1	261	28963.4	0	Unmodified	P75713_1full261_1G_P1_1T	28963.4	10	P75713_1full261_1G|ALLE_ECOLI|(S)-ureidoglycine aminohydrolase_P1
ALLP_ECOLI	full	1	484	52843.1	0	Unmodified	P75712_1full484_1G_P1_1T	52843.1	17	P75712_1full484_1G|ALLP_ECOLI|Putative allantoin permease_P1
ALLR_ECOLI	full	1	271	29486.5	0	Unmodified	P0ACN4_1full271_1G_P1_1T	29486.5	8	P0ACN4_1full271_1G|ALLR_ECOLI|HTH-type transcriptional repressor AllR_P1
ALLS_ECOLI	full	1	308	34676.1	0	Unmodified	P0ACR0_1full308_1G_P1_1T	34676.1	9	P0ACR0_1full308_1G|ALLS_ECOLI|HTH-type transcriptional activator AllS_P1
ALPA_ECOLI	full	1	70	8232.46	0	Unmodified	P33997_1full70_1G_P1_1T	8232.46	6	P33997_1full70_1G|ALPA_ECOLI|Prophage regulatory protein AlpA_P1
ALR1_ECOLI	full	1	359	39509.4	0	Unmodified	P0A6B4_1full359_1G_P1_1T	39509.4	12	P0A6B4_1full359_1G|ALR1_ECOLI|Alanine racemase, biosynthetic_P1
ALR2_ECOLI	full	1	356	39120.1	0	Unmodified	P29012_1full356_1G_P1_1T	39120.1	9	P29012_1full356_1G|ALR2_ECOLI|Alanine racemase, catabolic_P1
ALSA_ECOLI	full	1	510	57600	0	Unmodified	P32721_1full510_1G_P1_1T	57600	33	P32721_1full510_1G|ALSA_ECOLI|D-allose import ATP-binding protein AlsA_P1
ALSB_ECOLI	signal-peptide	1	23	2557.33	0	Unmodified	P39265_1frag23_1G_P1_1T	2557.33	2	P39265_1frag23_1G|ALSB_ECOLI|D-allose-binding periplasmic protein_P1
ALSB_ECOLI	chain	24	311	30639.3	0	Unmodified	P39265_24frag311_1G_P1_1T	30639.3	27	P39265_24frag311_1G|ALSB_ECOLI|D-allose-binding periplasmic protein_P1
ALSB_ECOLI	full	1	311	33178.6	0	Unmodified	P39265_1full311_1G_P1_1T	33178.6	29	P39265_1full311_1G|ALSB_ECOLI|D-allose-binding periplasmic protein_P1
ALSC_ECOLI	full	1	326	34479.7	0	Unmodified	P32720_1full326_1G_P1_1T	34479.7	9	P32720_1full326_1G|ALSC_ECOLI|D-allose transport system permease protein AlsC_P1
ALSE_ECOLI	full	1	231	26383.5	0	Unmodified	P32719_1full231_1G_P1_1T	26383.5	15	P32719_1full231_1G|ALSE_ECOLI|D-allulose-6-phosphate 3-epimerase_P1
ALSK_ECOLI	full	1	309	34376.3	0	Unmodified	P32718_1full309_1G_P1_1T	34376.3	8	P32718_1full309_1G|ALSK_ECOLI|D-allose kinase_P1
ALX_ECOLI	full	1	321	35949.5	0	Unmodified	P42601_1full321_1G_P1_1T	35949.5	8	P42601_1full321_1G|ALX_ECOLI|Inner membrane protein alx_P1
AMIA_ECOLI	signal-peptide	1	34	3613.06	0	Unmodified	P36548_1frag34_1G_P1_1T	3613.06	3	P36548_1frag34_1G|AMIA_ECOLI|N-acetylmuramoyl-L-alanine amidase AmiA_P1
AMIA_ECOLI	chain	35	289	28030.3	0	Unmodified	P36548_35frag289_1G_P1_1T	28030.3	26	P36548_35frag289_1G|AMIA_ECOLI|N-acetylmuramoyl-L-alanine amidase AmiA_P1
AMIA_ECOLI	full	1	289	31625.3	0	Unmodified	P36548_1full289_1G_P1_1T	31625.3	29	P36548_1full289_1G|AMIA_ECOLI|N-acetylmuramoyl-L-alanine amidase AmiA_P1
AMIB_ECOLI	signal-peptide	1	22	2590.39	0	Unmodified	P26365_1frag22_1G_P1_1T	2590.39	0	P26365_1frag22_1G|AMIB_ECOLI|N-acetylmuramoyl-L-alanine amidase AmiB_P1
AMIB_ECOLI	chain	23	445	45568.7	0	Unmodified	P26365_23frag445_1G_P1_1T	45568.7	16	P26365_23frag445_1G|AMIB_ECOLI|N-acetylmuramoyl-L-alanine amidase AmiB_P1
AMIB_ECOLI	full	1	445	48141.1	0	Unmodified	P26365_1full445_1G_P1_1T	48141.1	16	P26365_1full445_1G|AMIB_ECOLI|N-acetylmuramoyl-L-alanine amidase AmiB_P1
AMIC_ECOLI	signal-peptide	1	31	3259.73	0	Unmodified	P63883_1frag31_1G_P1_1T	3259.73	0	P63883_1frag31_1G|AMIC_ECOLI|N-acetylmuramoyl-L-alanine amidase AmiC_P1
AMIC_ECOLI	chain	32	417	42604.8	0	Unmodified	P63883_32frag417_1G_P1_1T	42604.8	30	P63883_32frag417_1G|AMIC_ECOLI|N-acetylmuramoyl-L-alanine amidase AmiC_P1
AMIC_ECOLI	full	1	417	45846.5	0	Unmodified	P63883_1full417_1G_P1_1T	45846.5	30	P63883_1full417_1G|AMIC_ECOLI|N-acetylmuramoyl-L-alanine amidase AmiC_P1
AMID_ECOLI	signal-peptide	1	16	1834.04	0	Unmodified	P75820_1frag16_1G_P1_1T	1834.04	0	P75820_1frag16_1G|AMID_ECOLI|N-acetylmuramoyl-L-alanine amidase AmiD_P1
AMID_ECOLI	chain	17	276	29390.2	0	Unmodified	P75820_17frag276_1G_P1_1T	29390.2	12	P75820_17frag276_1G|AMID_ECOLI|N-acetylmuramoyl-L-alanine amidase AmiD_P1
AMID_ECOLI	full	1	276	31206.3	0	Unmodified	P75820_1full276_1G_P1_1T	31206.3	12	P75820_1full276_1G|AMID_ECOLI|N-acetylmuramoyl-L-alanine amidase AmiD_P1
AMN_ECOLI	full	1	484	54342.7	0	Unmodified	P0AE12_1full484_1G_P1_1T	54342.7	12	P0AE12_1full484_1G|AMN_ECOLI|AMP nucleosidase_P1
AMO_ECOLI	signal-peptide	1	30	3161.68	0	Unmodified	P46883_1frag30_1G_P1_1T	3161.68	1	P46883_1frag30_1G|AMO_ECOLI|Primary amine oxidase_P1
AMO_ECOLI	chain	31	757	81582.6	0	Unmodified	P46883_31frag757_1G_P1_1T	81582.6	49	P46883_31frag757_1G|AMO_ECOLI|Primary amine oxidase_P1
AMO_ECOLI	full	1	757	84726.3	0	Unmodified	P46883_1full757_1G_P1_1T	84726.3	50	P46883_1full757_1G|AMO_ECOLI|Primary amine oxidase_P1
AMPA_ECOLI	full	1	503	55550.5	0	Unmodified	P68767_1full503_1G_P1_1T	55550.5	24	P68767_1full503_1G|AMPA_ECOLI|Cytosol aminopeptidase_P1
AMPC_ECOLI	signal-peptide	1	19	2143.06	0	Unmodified	P00811_1frag19_1G_P1_1T	2143.06	1	P00811_1frag19_1G|AMPC_ECOLI|Beta-lactamase_P1
AMPC_ECOLI	chain	20	377	39694.7	0	Unmodified	P00811_20frag377_1G_P1_1T	39694.7	21	P00811_20frag377_1G|AMPC_ECOLI|Beta-lactamase_P1
AMPC_ECOLI	full	1	377	41819.8	0	Unmodified	P00811_1full377_1G_P1_1T	41819.8	22	P00811_1full377_1G|AMPC_ECOLI|Beta-lactamase_P1
AMPD_ECOLI	full	1	183	20840.3	0	Unmodified	P13016_1full183_1G_P1_1T	20840.3	4	P13016_1full183_1G|AMPD_ECOLI|1,6-anhydro-N-acetylmuramyl-L-alanine amidase AmpD_P1
AMPE_ECOLI	full	1	284	32279.5	0	Unmodified	P0AE14_1full284_1G_P1_1T	32279.5	8	P0AE14_1full284_1G|AMPE_ECOLI|Protein AmpE_P1
AMPG_ECOLI	full	1	491	53575.7	0	Unmodified	P0AE16_1full491_1G_P1_1T	53575.7	10	P0AE16_1full491_1G|AMPG_ECOLI|Protein AmpG_P1
AMPH_ECOLI	signal-peptide	1	21	2269.22	0	Unmodified	P0AD70_1frag21_1G_P1_1T	2269.22	1	P0AD70_1frag21_1G|AMPH_ECOLI|D-alanyl-D-alanine-carboxypeptidase/endopeptidase AmpH_P1
AMPH_ECOLI	chain	22	385	39878.5	0	Unmodified	P0AD70_22frag385_1G_P1_1T	39878.5	16	P0AD70_22frag385_1G|AMPH_ECOLI|D-alanyl-D-alanine-carboxypeptidase/endopeptidase AmpH_P1
AMPH_ECOLI	full	1	385	42129.7	0	Unmodified	P0AD70_1full385_1G_P1_1T	42129.7	17	P0AD70_1full385_1G|AMPH_ECOLI|D-alanyl-D-alanine-carboxypeptidase/endopeptidase AmpH_P1
AMPN_ECOLI	chain	2	870	99462.4	0	Unmodified	P04825_2frag870_1G_P1_1T	99462.4	35	P04825_2frag870_1G|AMPN_ECOLI|Aminopeptidase N_P1
AMPN_ECOLI	full	1	870	99593.4	0	Unmodified	P04825_1full870_1G_P1_1T	99593.4	35	P04825_1full870_1G|AMPN_ECOLI|Aminopeptidase N_P1
AMPP_ECOLI	chain	2	441	49985.4	0	Unmodified	P15034_2frag441_1G_P1_1T	49985.4	13	P15034_2frag441_1G|AMPP_ECOLI|Xaa-Pro aminopeptidase_P1
AMPP_ECOLI	full	1	441	50116.4	0	Unmodified	P15034_1full441_1G_P1_1T	50116.4	13	P15034_1full441_1G|AMPP_ECOLI|Xaa-Pro aminopeptidase_P1
AMTB_ECOLI	signal-peptide	1	22	2245.29	0	Unmodified	P69681_1frag22_1G_P1_1T	2245.29	2	P69681_1frag22_1G|AMTB_ECOLI|Ammonia channel_P1
AMTB_ECOLI	chain	23	428	42802.5	0	Unmodified	P69681_23frag428_1G_P1_1T	42802.5	9	P69681_23frag428_1G|AMTB_ECOLI|Ammonia channel_P1
AMTB_ECOLI	full	1	428	45029.8	0	Unmodified	P69681_1full428_1G_P1_1T	45029.8	11	P69681_1full428_1G|AMTB_ECOLI|Ammonia channel_P1
AMY1_ECOLI	signal-peptide	1	17	1830	0	Unmodified	P25718_1frag17_1G_P1_1T	1830	1	P25718_1frag17_1G|AMY1_ECOLI|Periplasmic alpha-amylase_P1
AMY1_ECOLI	chain	18	676	74394.5	0	Unmodified	P25718_18frag676_1G_P1_1T	74394.5	31	P25718_18frag676_1G|AMY1_ECOLI|Periplasmic alpha-amylase_P1
AMY1_ECOLI	full	1	676	76206.5	0	Unmodified	P25718_1full676_1G_P1_1T	76206.5	32	P25718_1full676_1G|AMY1_ECOLI|Periplasmic alpha-amylase_P1
AMY2_ECOLI	full	1	495	57162.8	0	Unmodified	P26612_1full495_1G_P1_1T	57162.8	20	P26612_1full495_1G|AMY2_ECOLI|Cytoplasmic alpha-amylase_P1
ANMK_ECOLI	full	1	369	39755.5	0	Unmodified	P77570_1full369_1G_P1_1T	39755.5	7	P77570_1full369_1G|ANMK_ECOLI|Anhydro-N-acetylmuramic acid kinase_P1
ANSP_ECOLI	full	1	499	54561.8	0	Unmodified	P77610_1full499_1G_P1_1T	54561.8	17	P77610_1full499_1G|ANSP_ECOLI|L-asparagine permease_P1
APAG_ECOLI	full	1	125	13915	0	Unmodified	P62672_1full125_1G_P1_1T	13915	0	P62672_1full125_1G|APAG_ECOLI|Protein ApaG_P1
APAH_ECOLI	full	1	280	31723	0	Unmodified	P05637_1full280_1G_P1_1T	31723	13	P05637_1full280_1G|APAH_ECOLI|Bis(5'-nucleosyl)-tetraphosphatase [symmetrical]_P1
APBC_ECOLI	full	1	369	40235.9	0	Unmodified	P0AF08_1full369_1G_P1_1T	40235.9	19	P0AF08_1full369_1G|APBC_ECOLI|Iron-sulfur cluster carrier protein_P1
APBE_ECOLI	signal-peptide	1	19	2055.12	0	Unmodified	P0AB85_1frag19_1G_P1_1T	2055.12	0	P0AB85_1frag19_1G|APBE_ECOLI|FAD:protein FMN transferase_P1
APBE_ECOLI	chain	20	351	36712.8	0	Unmodified	P0AB85_20frag351_1G_P1_1T	36712.8	21	P0AB85_20frag351_1G|APBE_ECOLI|FAD:protein FMN transferase_P1
APBE_ECOLI	full	1	351	38750	0	Unmodified	P0AB85_1full351_1G_P1_1T	38750	21	P0AB85_1full351_1G|APBE_ECOLI|FAD:protein FMN transferase_P1
APHA_ECOLI	signal-peptide	1	25	2655.47	0	Unmodified	P0AE22_1frag25_1G_P1_1T	2655.47	1	P0AE22_1frag25_1G|APHA_ECOLI|Class B acid phosphatase_P1
APHA_ECOLI	chain	26	237	23603	0	Unmodified	P0AE22_26frag237_1G_P1_1T	23603	11	P0AE22_26frag237_1G|APHA_ECOLI|Class B acid phosphatase_P1
APHA_ECOLI	full	1	237	26240.4	0	Unmodified	P0AE22_1full237_1G_P1_1T	26240.4	12	P0AE22_1full237_1G|APHA_ECOLI|Class B acid phosphatase_P1
APPB_ECOLI	full	1	378	42728.7	0	Unmodified	P26458_1full378_1G_P1_1T	42728.7	6	P26458_1full378_1G|APPB_ECOLI|Cytochrome bd-II ubiquinol oxidase subunit 2_P1
APPC_ECOLI	full	1	514	58027	0	Unmodified	P26459_1full514_1G_P1_1T	58027	11	P26459_1full514_1G|APPC_ECOLI|Cytochrome bd-II ubiquinol oxidase subunit 1_P1
APPX_ECOLI	full	1	30	3659.99	0	Unmodified	P24244_1full30_1G_P1_1T	3659.99	1	P24244_1full30_1G|APPX_ECOLI|Putative cytochrome bd-II ubiquinol oxidase subunit AppX_P1
APPY_ECOLI	full	1	249	29377.5	0	Unmodified	P05052_1full249_1G_P1_1T	29377.5	22	P05052_1full249_1G|APPY_ECOLI|HTH-type transcriptional regulator AppY_P1
APT_ECOLI	full	1	183	19942.8	0	Unmodified	P69503_1full183_1G_P1_1T	19942.8	12	P69503_1full183_1G|APT_ECOLI|Adenine phosphoribosyltransferase_P1
AQPZ_ECOLI	full	1	231	23841.7	0	Unmodified	P60844_1full231_1G_P1_1T	23841.7	5	P60844_1full231_1G|AQPZ_ECOLI|Aquaporin Z_P1
ARAA_ECOLI	full	1	500	56621.6	0	Unmodified	P08202_1full500_1G_P1_1T	56621.6	23	P08202_1full500_1G|ARAA_ECOLI|L-arabinose isomerase_P1
ARAB_ECOLI	chain	2	566	61903.1	0	Unmodified	P08204_2frag566_1G_P1_1T	61903.1	16	P08204_2frag566_1G|ARAB_ECOLI|Ribulokinase_P1
ARAB_ECOLI	full	1	566	62034.2	0	Unmodified	P08204_1full566_1G_P1_1T	62034.2	16	P08204_1full566_1G|ARAB_ECOLI|Ribulokinase_P1
ARAC_ECOLI	full	1	292	33704	0	Unmodified	P0A9E0_1full292_1G_P1_1T	33704	7	P0A9E0_1full292_1G|ARAC_ECOLI|Arabinose operon regulatory protein_P1
ARAD_ECOLI	full	1	231	25705	0	Unmodified	P08203_1full231_1G_P1_1T	25705	11	P08203_1full231_1G|ARAD_ECOLI|L-ribulose-5-phosphate 4-epimerase AraD_P1
ARAE_ECOLI	full	1	472	52055.5	0	Unmodified	P0AE24_1full472_1G_P1_1T	52055.5	15	P0AE24_1full472_1G|ARAE_ECOLI|Arabinose-proton symporter_P1
ARAF_ECOLI	signal-peptide	1	23	2363.25	0	Unmodified	P02924_1frag23_1G_P1_1T	2363.25	2	P02924_1frag23_1G|ARAF_ECOLI|L-arabinose-binding periplasmic protein_P1
ARAF_ECOLI	chain	24	329	33486.5	0	Unmodified	P02924_24frag329_1G_P1_1T	33486.5	30	P02924_24frag329_1G|ARAF_ECOLI|L-arabinose-binding periplasmic protein_P1
ARAF_ECOLI	full	1	329	35831.7	0	Unmodified	P02924_1full329_1G_P1_1T	35831.7	32	P02924_1full329_1G|ARAF_ECOLI|L-arabinose-binding periplasmic protein_P1
ARAG_ECOLI	full	1	504	55330.9	0	Unmodified	P0AAF3_1full504_1G_P1_1T	55330.9	22	P0AAF3_1full504_1G|ARAG_ECOLI|Arabinose import ATP-binding protein AraG_P1
ARAH_ECOLI	full	1	328	34683.8	0	Unmodified	P0AE26_1full328_1G_P1_1T	34683.8	12	P0AE26_1full328_1G|ARAH_ECOLI|L-arabinose transport system permease protein AraH_P1
ARAJ_ECOLI	full	1	394	42279.4	0	Unmodified	P23910_1full394_1G_P1_1T	42279.4	12	P23910_1full394_1G|ARAJ_ECOLI|Protein AraJ_P1
ARCA_ECOLI	full	1	238	27477.1	0	Unmodified	P0A9Q1_1full238_1G_P1_1T	27477.1	11	P0A9Q1_1full238_1G|ARCA_ECOLI|Aerobic respiration control protein ArcA_P1
ARCB_ECOLI	full	1	778	88442.4	0	Unmodified	P0AEC3_1full778_1G_P1_1T	88442.4	50	P0AEC3_1full778_1G|ARCB_ECOLI|Aerobic respiration control sensor protein ArcB_P1
ARCC_ECOLI	full	1	297	31818.6	0	Unmodified	P37306_1full297_1G_P1_1T	31818.6	10	P37306_1full297_1G|ARCC_ECOLI|Carbamate kinase_P1
ARCD_ECOLI	full	1	460	49907.1	0	Unmodified	P0AAE5_1full460_1G_P1_1T	49907.1	12	P0AAE5_1full460_1G|ARCD_ECOLI|Putative arginine/ornithine antiporter_P1
ARCL_ECOLI	full	1	310	33324.6	0	Unmodified	Q46807_1full310_1G_P1_1T	33324.6	20	Q46807_1full310_1G|ARCL_ECOLI|Carbamate kinase-like protein YqeA_P1
ARCM_ECOLI	full	1	316	34274.1	0	Unmodified	P77624_1full316_1G_P1_1T	34274.1	17	P77624_1full316_1G|ARCM_ECOLI|Carbamate kinase-like protein YahI_P1
ARFA_ECOLI	full	1	72	8303.41	0	Unmodified	P36675_1full72_1G_P1_1T	8303.41	10	P36675_1full72_1G|ARFA_ECOLI|Alternative ribosome-rescue factor A_P1
ARFB_ECOLI	full	1	140	15701.7	0	Unmodified	P40711_1full140_1G_P1_1T	15701.7	11	P40711_1full140_1G|ARFB_ECOLI|Peptidyl-tRNA hydrolase ArfB_P1
ARGA_ECOLI	full	1	443	49658.9	0	Unmodified	P0A6C5_1full443_1G_P1_1T	49658.9	19	P0A6C5_1full443_1G|ARGA_ECOLI|Amino-acid acetyltransferase_P1
ARGB_ECOLI	chain	2	258	27172.7	0	Unmodified	P0A6C8_2frag258_1G_P1_1T	27172.7	13	P0A6C8_2frag258_1G|ARGB_ECOLI|Acetylglutamate kinase_P1
ARGB_ECOLI	full	1	258	27303.7	0	Unmodified	P0A6C8_1full258_1G_P1_1T	27303.7	13	P0A6C8_1full258_1G|ARGB_ECOLI|Acetylglutamate kinase_P1
ARGC_ECOLI	full	1	334	36424.7	0	Unmodified	P11446_1full334_1G_P1_1T	36424.7	12	P11446_1full334_1G|ARGC_ECOLI|N-acetyl-gamma-glutamyl-phosphate reductase_P1
ARGD_ECOLI	chain	2	406	44078.4	0	Unmodified	P18335_2frag406_1G_P1_1T	44078.4	16	P18335_2frag406_1G|ARGD_ECOLI|Acetylornithine/succinyldiaminopimelate aminotransferase_P1
ARGD_ECOLI	full	1	406	44209.5	0	Unmodified	P18335_1full406_1G_P1_1T	44209.5	16	P18335_1full406_1G|ARGD_ECOLI|Acetylornithine/succinyldiaminopimelate aminotransferase_P1
ARGE_ECOLI	full	1	383	42888.9	0	Unmodified	P23908_1full383_1G_P1_1T	42888.9	14	P23908_1full383_1G|ARGE_ECOLI|Acetylornithine deacetylase_P1
ARGK_ECOLI	full	1	331	36997.2	0	Unmodified	P27254_1full331_1G_P1_1T	36997.2	11	P27254_1full331_1G|ARGK_ECOLI|GTPase ArgK_P1
ARGO_ECOLI	full	1	211	23371.4	0	Unmodified	P11667_1full211_1G_P1_1T	23371.4	5	P11667_1full211_1G|ARGO_ECOLI|Arginine exporter protein ArgO_P1
ARGP_ECOLI	full	1	297	33823.8	0	Unmodified	P0A8S1_1full297_1G_P1_1T	33823.8	11	P0A8S1_1full297_1G|ARGP_ECOLI|HTH-type transcriptional regulator ArgP_P1
ARGR_ECOLI	full	1	156	17129	0	Unmodified	P0A6D0_1full156_1G_P1_1T	17129	11	P0A6D0_1full156_1G|ARGR_ECOLI|Arginine repressor_P1
ARGT_ECOLI	signal-peptide	1	22	2239.28	0	Unmodified	P09551_1frag22_1G_P1_1T	2239.28	2	P09551_1frag22_1G|ARGT_ECOLI|Lysine/arginine/ornithine-binding periplasmic protein_P1
ARGT_ECOLI	chain	23	260	26067.4	0	Unmodified	P09551_23frag260_1G_P1_1T	26067.4	23	P09551_23frag260_1G|ARGT_ECOLI|Lysine/arginine/ornithine-binding periplasmic protein_P1
ARGT_ECOLI	full	1	260	28288.6	0	Unmodified	P09551_1full260_1G_P1_1T	28288.6	25	P09551_1full260_1G|ARGT_ECOLI|Lysine/arginine/ornithine-binding periplasmic protein_P1
ARIR_ECOLI	full	1	88	9720.06	0	Unmodified	P75993_1full88_1G_P1_1T	9720.06	4	P75993_1full88_1G|ARIR_ECOLI|Probable two-component-system connector protein AriR_P1
ARLY_ECOLI	full	1	457	50854.1	0	Unmodified	P11447_1full457_1G_P1_1T	50854.1	21	P11447_1full457_1G|ARLY_ECOLI|Argininosuccinate lyase_P1
ARNA_ECOLI	full	1	660	75069.7	0	Unmodified	P77398_1full660_1G_P1_1T	75069.7	25	P77398_1full660_1G|ARNA_ECOLI|Bifunctional polymyxin resistance protein ArnA_P1
ARNB_ECOLI	full	1	385	42551.1	0	Unmodified	P77690_1full385_1G_P1_1T	42551.1	14	P77690_1full385_1G|ARNB_ECOLI|UDP-4-amino-4-deoxy-L-arabinose--oxoglutarate aminotransferase_P1
ARNC_ECOLI	full	1	322	36616	0	Unmodified	P77757_1full322_1G_P1_1T	36616	9	P77757_1full322_1G|ARNC_ECOLI|Undecaprenyl-phosphate 4-deoxy-4-formamido-L-arabinose transferase_P1
ARND_ECOLI	full	1	296	33464.2	0	Unmodified	P76472_1full296_1G_P1_1T	33464.2	11	P76472_1full296_1G|ARND_ECOLI|Probable 4-deoxy-4-formamido-L-arabinose-phosphoundecaprenol deformylase ArnD_P1
ARNE_ECOLI	full	1	111	12443.9	0	Unmodified	Q47377_1full111_1G_P1_1T	12443.9	4	Q47377_1full111_1G|ARNE_ECOLI|Probable 4-amino-4-deoxy-L-arabinose-phosphoundecaprenol flippase subunit ArnE_P1
ARNF_ECOLI	full	1	128	14229.7	0	Unmodified	P76474_1full128_1G_P1_1T	14229.7	5	P76474_1full128_1G|ARNF_ECOLI|Probable 4-amino-4-deoxy-L-arabinose-phosphoundecaprenol flippase subunit ArnF_P1
ARNT_ECOLI	full	1	550	63053.2	0	Unmodified	P76473_1full550_1G_P1_1T	63053.2	19	P76473_1full550_1G|ARNT_ECOLI|Undecaprenyl phosphate-alpha-4-amino-4-deoxy-L-arabinose arabinosyl transferase_P1
AROA_ECOLI	full	1	427	46544.8	0	Unmodified	P0A6D3_1full427_1G_P1_1T	46544.8	17	P0A6D3_1full427_1G|AROA_ECOLI|3-phosphoshikimate 1-carboxyvinyltransferase_P1
AROB_ECOLI	full	1	362	39245.6	0	Unmodified	P07639_1full362_1G_P1_1T	39245.6	13	P07639_1full362_1G|AROB_ECOLI|3-dehydroquinate synthase_P1
AROC_ECOLI	chain	2	361	39338.3	0	Unmodified	P12008_2frag361_1G_P1_1T	39338.3	16	P12008_2frag361_1G|AROC_ECOLI|Chorismate synthase_P1
AROC_ECOLI	full	1	361	39469.3	0	Unmodified	P12008_1full361_1G_P1_1T	39469.3	16	P12008_1full361_1G|AROC_ECOLI|Chorismate synthase_P1
AROD_ECOLI	full	1	252	27577.4	0	Unmodified	P05194_1full252_1G_P1_1T	27577.4	16	P05194_1full252_1G|AROD_ECOLI|3-dehydroquinate dehydratase_P1
AROE_ECOLI	full	1	272	29630.3	0	Unmodified	P15770_1full272_1G_P1_1T	29630.3	8	P15770_1full272_1G|AROE_ECOLI|Shikimate dehydrogenase (NADP(+))_P1
AROF_ECOLI	full	1	356	39168.7	0	Unmodified	P00888_1full356_1G_P1_1T	39168.7	13	P00888_1full356_1G|AROF_ECOLI|Phospho-2-dehydro-3-deoxyheptonate aldolase, Tyr-sensitive_P1
AROG_ECOLI	full	1	350	38577	0	Unmodified	P0AB91_1full350_1G_P1_1T	38577	24	P0AB91_1full350_1G|AROG_ECOLI|Phospho-2-dehydro-3-deoxyheptonate aldolase, Phe-sensitive_P1
AROH_ECOLI	full	1	348	39206	0	Unmodified	P00887_1full348_1G_P1_1T	39206	12	P00887_1full348_1G|AROH_ECOLI|Phospho-2-dehydro-3-deoxyheptonate aldolase, Trp-sensitive_P1
AROK_ECOLI	chain	2	173	19475.2	0	Unmodified	P0A6D7_2frag173_1G_P1_1T	19475.2	10	P0A6D7_2frag173_1G|AROK_ECOLI|Shikimate kinase 1_P1
AROK_ECOLI	full	1	173	19606.2	0	Unmodified	P0A6D7_1full173_1G_P1_1T	19606.2	10	P0A6D7_1full173_1G|AROK_ECOLI|Shikimate kinase 1_P1
AROL_ECOLI	chain	2	174	19194.8	0	Unmodified	P0A6E1_2frag174_1G_P1_1T	19194.8	2	P0A6E1_2frag174_1G|AROL_ECOLI|Shikimate kinase 2_P1
AROL_ECOLI	full	1	174	19325.9	0	Unmodified	P0A6E1_1full174_1G_P1_1T	19325.9	2	P0A6E1_1full174_1G|AROL_ECOLI|Shikimate kinase 2_P1
AROM_ECOLI	full	1	225	25022.4	0	Unmodified	P0AE28_1full225_1G_P1_1T	25022.4	8	P0AE28_1full225_1G|AROM_ECOLI|Protein AroM_P1
AROP_ECOLI	full	1	457	50005.6	0	Unmodified	P15993_1full457_1G_P1_1T	50005.6	15	P15993_1full457_1G|AROP_ECOLI|Aromatic amino acid transport protein AroP_P1
ARPA_ECOLI	full	1	728	83507.5	0	Unmodified	P23325_1full728_1G_P1_1T	83507.5	56	P23325_1full728_1G|ARPA_ECOLI|Ankyrin repeat protein A_P1
ARPB_ECOLI	full	1	632	71287.2	0	Unmodified	P76205_1full632_1G_P1_1T	71287.2	35	P76205_1full632_1G|ARPB_ECOLI|Putative ankyrin repeat protein B_P1
ARSB_ECOLI	full	1	429	45613.2	0	Unmodified	P0AB93_1full429_1G_P1_1T	45613.2	11	P0AB93_1full429_1G|ARSB_ECOLI|Arsenical pump membrane protein_P1
ARSC_ECOLI	full	1	141	16021.5	0	Unmodified	P0AB96_1full141_1G_P1_1T	16021.5	8	P0AB96_1full141_1G|ARSC_ECOLI|Arsenate reductase_P1
ARSR_ECOLI	full	1	117	13642.2	0	Unmodified	P37309_1full117_1G_P1_1T	13642.2	7	P37309_1full117_1G|ARSR_ECOLI|Arsenical resistance operon repressor_P1
ARTI_ECOLI	signal-peptide	1	19	1920.15	0	Unmodified	P30859_1frag19_1G_P1_1T	1920.15	2	P30859_1frag19_1G|ARTI_ECOLI|Putative ABC transporter arginine-binding protein 2_P1
ARTI_ECOLI	chain	20	243	25301	0	Unmodified	P30859_20frag243_1G_P1_1T	25301	20	P30859_20frag243_1G|ARTI_ECOLI|Putative ABC transporter arginine-binding protein 2_P1
ARTI_ECOLI	full	1	243	27203.1	0	Unmodified	P30859_1full243_1G_P1_1T	27203.1	22	P30859_1full243_1G|ARTI_ECOLI|Putative ABC transporter arginine-binding protein 2_P1
ARTJ_ECOLI	signal-peptide	1	19	1954.13	0	Unmodified	P30860_1frag19_1G_P1_1T	1954.13	2	P30860_1frag19_1G|ARTJ_ECOLI|ABC transporter arginine-binding protein 1_P1
ARTJ_ECOLI	chain	20	243	25166.9	0	Unmodified	P30860_20frag243_1G_P1_1T	25166.9	20	P30860_20frag243_1G|ARTJ_ECOLI|ABC transporter arginine-binding protein 1_P1
ARTJ_ECOLI	full	1	243	27103	0	Unmodified	P30860_1full243_1G_P1_1T	27103	22	P30860_1full243_1G|ARTJ_ECOLI|ABC transporter arginine-binding protein 1_P1
ARTM_ECOLI	full	1	222	25067.6	0	Unmodified	P0AE30_1full222_1G_P1_1T	25067.6	7	P0AE30_1full222_1G|ARTM_ECOLI|Arginine ABC transporter permease protein ArtM_P1
ARTP_ECOLI	full	1	242	27297.2	0	Unmodified	P0AAF6_1full242_1G_P1_1T	27297.2	8	P0AAF6_1full242_1G|ARTP_ECOLI|Arginine transport ATP-binding protein ArtP_P1
ARTQ_ECOLI	full	1	238	26362.3	0	Unmodified	P0AE34_1full238_1G_P1_1T	26362.3	6	P0AE34_1full238_1G|ARTQ_ECOLI|Arginine ABC transporter permease protein ArtQ_P1
ASCB_ECOLI	full	1	474	54491.9	0	Unmodified	P24240_1full474_1G_P1_1T	54491.9	24	P24240_1full474_1G|ASCB_ECOLI|6-phospho-beta-glucosidase AscB_P1
ASCG_ECOLI	full	1	336	37032.3	0	Unmodified	P24242_1full336_1G_P1_1T	37032.3	16	P24242_1full336_1G|ASCG_ECOLI|HTH-type transcriptional regulator AscG_P1
ASLA_ECOLI	signal-peptide	1	24	2513.36	0	Unmodified	P25549_1frag24_1G_P1_1T	2513.36	1	P25549_1frag24_1G|ASLA_ECOLI|Arylsulfatase_P1
ASLA_ECOLI	chain	25	551	58554.1	0	Unmodified	P25549_25frag551_1G_P1_1T	58554.1	31	P25549_25frag551_1G|ASLA_ECOLI|Arylsulfatase_P1
ASLA_ECOLI	full	1	551	61049.5	0	Unmodified	P25549_1full551_1G_P1_1T	61049.5	32	P25549_1full551_1G|ASLA_ECOLI|Arylsulfatase_P1
ASLB_ECOLI	full	1	411	47425.6	0	Unmodified	P25550_1full411_1G_P1_1T	47425.6	18	P25550_1full411_1G|ASLB_ECOLI|Anaerobic sulfatase-maturating enzyme homolog AslB_P1
ASMA_ECOLI	signal-peptide	1	22	2429.46	0	Unmodified	P28249_1frag22_1G_P1_1T	2429.46	0	P28249_1frag22_1G|ASMA_ECOLI|Protein AsmA_P1
ASMA_ECOLI	chain	23	617	66742	0	Unmodified	P28249_23frag617_1G_P1_1T	66742	22	P28249_23frag617_1G|ASMA_ECOLI|Protein AsmA_P1
ASMA_ECOLI	full	1	617	69153.4	0	Unmodified	P28249_1full617_1G_P1_1T	69153.4	22	P28249_1full617_1G|ASMA_ECOLI|Protein AsmA_P1
ASNA_ECOLI	full	1	330	36862	0	Unmodified	P00963_1full330_1G_P1_1T	36862	15	P00963_1full330_1G|ASNA_ECOLI|Aspartate--ammonia ligase_P1
ASNB_ECOLI	chain	2	554	63208.7	0	Unmodified	P22106_2frag554_1G_P1_1T	63208.7	33	P22106_2frag554_1G|ASNB_ECOLI|Asparagine synthetase B [glutamine-hydrolyzing]_P1
ASNB_ECOLI	full	1	554	63339.7	0	Unmodified	P22106_1full554_1G_P1_1T	63339.7	33	P22106_1full554_1G|ASNB_ECOLI|Asparagine synthetase B [glutamine-hydrolyzing]_P1
ASNC_ECOLI	full	1	152	17071.1	0	Unmodified	P0ACI6_1full152_1G_P1_1T	17071.1	10	P0ACI6_1full152_1G|ASNC_ECOLI|Regulatory protein AsnC_P1
ASPA_ECOLI	full	1	478	53166.2	0	Unmodified	P0AC38_1full478_1G_P1_1T	53166.2	27	P0AC38_1full478_1G|ASPA_ECOLI|Aspartate ammonia-lyase_P1
ASPG1_ECOLI	full	1	338	37240.9	0	Unmodified	P0A962_1full338_1G_P1_1T	37240.9	10	P0A962_1full338_1G|ASPG1_ECOLI|L-asparaginase 1_P1
ASPG2_ECOLI	signal-peptide	1	22	2289.22	0	Unmodified	P00805_1frag22_1G_P1_1T	2289.22	2	P00805_1frag22_1G|ASPG2_ECOLI|L-asparaginase 2_P1
ASPG2_ECOLI	chain	23	348	34862.9	0	Unmodified	P00805_23frag348_1G_P1_1T	34862.9	22	P00805_23frag348_1G|ASPG2_ECOLI|L-asparaginase 2_P1
ASPG2_ECOLI	full	1	348	37134.1	0	Unmodified	P00805_1full348_1G_P1_1T	37134.1	24	P00805_1full348_1G|ASPG2_ECOLI|L-asparaginase 2_P1
ASR_ECOLI	signal-peptide	1	21	2064.18	0	Unmodified	P36560_1frag21_1G_P1_1T	2064.18	2	P36560_1frag21_1G|ASR_ECOLI|Acid shock protein_P1
ASR_ECOLI	propeptide	22	58	3868.12	0	Unmodified	P36560_22frag58_1G_P1_1T	3868.12	6	P36560_22frag58_1G|ASR_ECOLI|Acid shock protein_P1
ASR_ECOLI	chain	59	102	4840.76	0	Unmodified	P36560_59frag102_1G_P1_1T	4840.76	11	P36560_59frag102_1G|ASR_ECOLI|Acid shock protein_P1
ASR_ECOLI	full	1	102	10737	0	Unmodified	P36560_1full102_1G_P1_1T	10737	19	P36560_1full102_1G|ASR_ECOLI|Acid shock protein_P1
ASSY_ECOLI	chain	2	447	50059.1	0	Unmodified	P0A6E4_2frag447_1G_P1_1T	50059.1	19	P0A6E4_2frag447_1G|ASSY_ECOLI|Argininosuccinate synthase_P1
ASSY_ECOLI	full	1	447	50190.2	0	Unmodified	P0A6E4_1full447_1G_P1_1T	50190.2	19	P0A6E4_1full447_1G|ASSY_ECOLI|Argininosuccinate synthase_P1
ASTA_ECOLI	full	1	344	38950.8	0	Unmodified	P0AE37_1full344_1G_P1_1T	38950.8	15	P0AE37_1full344_1G|ASTA_ECOLI|Arginine N-succinyltransferase_P1
ASTB_ECOLI	full	1	447	49511.1	0	Unmodified	P76216_1full447_1G_P1_1T	49511.1	9	P76216_1full447_1G|ASTB_ECOLI|N-succinylarginine dihydrolase_P1
ASTC_ECOLI	full	1	406	44084.3	0	Unmodified	P77581_1full406_1G_P1_1T	44084.3	13	P77581_1full406_1G|ASTC_ECOLI|Succinylornithine transaminase_P1
ASTD_ECOLI	full	1	492	53358.4	0	Unmodified	P76217_1full492_1G_P1_1T	53358.4	10	P76217_1full492_1G|ASTD_ECOLI|N-succinylglutamate 5-semialdehyde dehydrogenase_P1
ASTE_ECOLI	full	1	322	36077.6	0	Unmodified	P76215_1full322_1G_P1_1T	36077.6	9	P76215_1full322_1G|ASTE_ECOLI|Succinylglutamate desuccinylase_P1
ATDA_ECOLI	chain	2	186	21944.3	0	Unmodified	P0A951_2frag186_1G_P1_1T	21944.3	11	P0A951_2frag186_1G|ATDA_ECOLI|Spermidine N(1)-acetyltransferase_P1
ATDA_ECOLI	full	1	186	22075.3	0	Unmodified	P0A951_1full186_1G_P1_1T	22075.3	11	P0A951_1full186_1G|ATDA_ECOLI|Spermidine N(1)-acetyltransferase_P1
ATL_ECOLI	full	1	129	14537.5	0	Unmodified	P0AFP2_1full129_1G_P1_1T	14537.5	5	P0AFP2_1full129_1G|ATL_ECOLI|DNA base-flipping protein_P1
ATMA_ECOLI	full	1	898	100254	0	Unmodified	P0ABB8_1full898_1G_P1_1T	100254	35	P0ABB8_1full898_1G|ATMA_ECOLI|Magnesium-transporting ATPase, P-type 1_P1
ATOA_ECOLI	full	1	216	23285.9	0	Unmodified	P76459_1full216_1G_P1_1T	23285.9	7	P76459_1full216_1G|ATOA_ECOLI|Acetate CoA-transferase subunit beta_P1
ATOB_ECOLI	full	1	394	40756.3	0	Unmodified	P76461_1full394_1G_P1_1T	40756.3	18	P76461_1full394_1G|ATOB_ECOLI|Acetyl-CoA acetyltransferase_P1
ATOC_ECOLI	full	1	461	52588.6	0	Unmodified	Q06065_1full461_1G_P1_1T	52588.6	20	Q06065_1full461_1G|ATOC_ECOLI|Acetoacetate metabolism regulatory protein AtoC_P1
ATOD_ECOLI	full	1	220	23673.5	0	Unmodified	P76458_1full220_1G_P1_1T	23673.5	6	P76458_1full220_1G|ATOD_ECOLI|Acetate CoA-transferase subunit alpha_P1
ATOE_ECOLI	full	1	440	47747.1	0	Unmodified	P76460_1full440_1G_P1_1T	47747.1	10	P76460_1full440_1G|ATOE_ECOLI|Putative short-chain fatty acid transporter_P1
ATOS_ECOLI	full	1	608	67917	0	Unmodified	Q06067_1full608_1G_P1_1T	67917	14	Q06067_1full608_1G|ATOS_ECOLI|Signal transduction histidine-protein kinase AtoS_P1
ATP6_ECOLI	full	1	271	30363.5	0	Unmodified	P0AB98_1full271_1G_P1_1T	30363.5	10	P0AB98_1full271_1G|ATP6_ECOLI|ATP synthase subunit a_P1
ATPA_ECOLI	full	1	513	55608.2	0	Unmodified	P0ABB0_1full513_1G_P1_1T	55608.2	24	P0ABB0_1full513_1G|ATPA_ECOLI|ATP synthase subunit alpha_P1
ATPB_ECOLI	chain	2	460	50380.1	0	Unmodified	P0ABB4_2frag460_1G_P1_1T	50380.1	20	P0ABB4_2frag460_1G|ATPB_ECOLI|ATP synthase subunit beta_P1
ATPB_ECOLI	full	1	460	50511.1	0	Unmodified	P0ABB4_1full460_1G_P1_1T	50511.1	20	P0ABB4_1full460_1G|ATPB_ECOLI|ATP synthase subunit beta_P1
ATPD_ECOLI	full	1	177	19498.1	0	Unmodified	P0ABA4_1full177_1G_P1_1T	19498.1	8	P0ABA4_1full177_1G|ATPD_ECOLI|ATP synthase subunit delta_P1
ATPE_ECOLI	chain	2	139	14991.8	0	Unmodified	P0A6E6_2frag139_1G_P1_1T	14991.8	8	P0A6E6_2frag139_1G|ATPE_ECOLI|ATP synthase epsilon chain_P1
ATPE_ECOLI	full	1	139	15122.9	0	Unmodified	P0A6E6_1full139_1G_P1_1T	15122.9	8	P0A6E6_1full139_1G|ATPE_ECOLI|ATP synthase epsilon chain_P1
ATPF_ECOLI	full	1	156	17430.5	0	Unmodified	P0ABA0_1full156_1G_P1_1T	17430.5	15	P0ABA0_1full156_1G|ATPF_ECOLI|ATP synthase subunit b_P1
ATPG_ECOLI	full	1	287	31855.7	0	Unmodified	P0ABA6_1full287_1G_P1_1T	31855.7	23	P0ABA6_1full287_1G|ATPG_ECOLI|ATP synthase gamma chain_P1
ATPL_ECOLI	full	1	79	8258.41	0	Unmodified	P68699_1full79_1G_P1_1T	8258.41	1	P68699_1full79_1G|ATPL_ECOLI|ATP synthase subunit c_P1
ATPZ_ECOLI	chain	2	126	13539.9	0	Unmodified	P0ABC0_2frag126_1G_P1_1T	13539.9	6	P0ABC0_2frag126_1G|ATPZ_ECOLI|ATP synthase protein I_P1
ATPZ_ECOLI	full	1	126	13671	0	Unmodified	P0ABC0_1full126_1G_P1_1T	13671	6	P0ABC0_1full126_1G|ATPZ_ECOLI|ATP synthase protein I_P1
ATZN_ECOLI	full	1	732	77505.4	0	Unmodified	P37617_1full732_1G_P1_1T	77505.4	25	P37617_1full732_1G|ATZN_ECOLI|Lead, cadmium, zinc and mercury-transporting ATPase_P1
AVTA_ECOLI	full	1	417	47232.4	0	Unmodified	P09053_1full417_1G_P1_1T	47232.4	19	P09053_1full417_1G|AVTA_ECOLI|Valine--pyruvate aminotransferase_P1
AZOR_ECOLI	chain	2	201	21601.4	0	Unmodified	P41407_2frag201_1G_P1_1T	21601.4	11	P41407_2frag201_1G|AZOR_ECOLI|FMN-dependent NADH-azoreductase_P1
AZOR_ECOLI	full	1	201	21732.5	0	Unmodified	P41407_1full201_1G_P1_1T	21732.5	11	P41407_1full201_1G|AZOR_ECOLI|FMN-dependent NADH-azoreductase_P1
AZUC_ECOLI	full	1	28	3502.86	0	Unmodified	C1P605_1full28_1G_P1_1T	3502.86	5	C1P605_1full28_1G|AZUC_ECOLI|Uncharacterized protein AzuC_P1
BAER_ECOLI	full	1	240	27946.8	0	Unmodified	P69228_1full240_1G_P1_1T	27946.8	10	P69228_1full240_1G|BAER_ECOLI|Transcriptional regulatory protein BaeR_P1
BAES_ECOLI	full	1	467	52201.5	0	Unmodified	P30847_1full467_1G_P1_1T	52201.5	16	P30847_1full467_1G|BAES_ECOLI|Signal transduction histidine-protein kinase BaeS_P1
BAMA_ECOLI	signal-peptide	1	20	2159.21	0	Unmodified	P0A940_1frag20_1G_P1_1T	2159.21	2	P0A940_1frag20_1G|BAMA_ECOLI|Outer membrane protein assembly factor BamA_P1
BAMA_ECOLI	chain	21	810	88830	0	Unmodified	P0A940_21frag810_1G_P1_1T	88830	43	P0A940_21frag810_1G|BAMA_ECOLI|Outer membrane protein assembly factor BamA_P1
BAMA_ECOLI	full	1	810	90971.2	0	Unmodified	P0A940_1full810_1G_P1_1T	90971.2	45	P0A940_1full810_1G|BAMA_ECOLI|Outer membrane protein assembly factor BamA_P1
BAMB_ECOLI	signal-peptide	1	19	2059.27	0	Unmodified	P77774_1frag19_1G_P1_1T	2059.27	1	P77774_1frag19_1G|BAMB_ECOLI|Outer membrane protein assembly factor BamB_P1
BAMB_ECOLI	chain	20	392	39981.3	0	Unmodified	P77774_20frag392_1G_P1_1T	39981.3	12	P77774_20frag392_1G|BAMB_ECOLI|Outer membrane protein assembly factor BamB_P1
BAMB_ECOLI	full	1	392	42022.5	0	Unmodified	P77774_1full392_1G_P1_1T	42022.5	13	P77774_1full392_1G|BAMB_ECOLI|Outer membrane protein assembly factor BamB_P1
BAMC_ECOLI	signal-peptide	1	24	2503.49	0	Unmodified	P0A903_1frag24_1G_P1_1T	2503.49	2	P0A903_1frag24_1G|BAMC_ECOLI|Outer membrane protein assembly factor BamC_P1
BAMC_ECOLI	chain	25	344	34511.4	0	Unmodified	P0A903_25frag344_1G_P1_1T	34511.4	13	P0A903_25frag344_1G|BAMC_ECOLI|Outer membrane protein assembly factor BamC_P1
BAMC_ECOLI	full	1	344	36996.8	0	Unmodified	P0A903_1full344_1G_P1_1T	36996.8	15	P0A903_1full344_1G|BAMC_ECOLI|Outer membrane protein assembly factor BamC_P1
BAMD_ECOLI	signal-peptide	1	19	2064.14	0	Unmodified	P0AC02_1frag19_1G_P1_1T	2064.14	1	P0AC02_1frag19_1G|BAMD_ECOLI|Outer membrane protein assembly factor BamD_P1
BAMD_ECOLI	chain	20	245	25902.9	0	Unmodified	P0AC02_20frag245_1G_P1_1T	25902.9	9	P0AC02_20frag245_1G|BAMD_ECOLI|Outer membrane protein assembly factor BamD_P1
BAMD_ECOLI	full	1	245	27949	0	Unmodified	P0AC02_1full245_1G_P1_1T	27949	10	P0AC02_1full245_1G|BAMD_ECOLI|Outer membrane protein assembly factor BamD_P1
BAME_ECOLI	signal-peptide	1	19	1999.09	0	Unmodified	P0A937_1frag19_1G_P1_1T	1999.09	1	P0A937_1frag19_1G|BAME_ECOLI|Outer membrane protein assembly factor BamE_P1
BAME_ECOLI	chain	20	113	10451.2	0	Unmodified	P0A937_20frag113_1G_P1_1T	10451.2	2	P0A937_20frag113_1G|BAME_ECOLI|Outer membrane protein assembly factor BamE_P1
BAME_ECOLI	full	1	113	12432.3	0	Unmodified	P0A937_1full113_1G_P1_1T	12432.3	3	P0A937_1full113_1G|BAME_ECOLI|Outer membrane protein assembly factor BamE_P1
BARA_ECOLI	full	1	918	103239	0	Unmodified	P0AEC5_1full918_1G_P1_1T	103239	35	P0AEC5_1full918_1G|BARA_ECOLI|Signal transduction histidine-protein kinase BarA_P1
BASR_ECOLI	full	1	222	25144.3	0	Unmodified	P30843_1full222_1G_P1_1T	25144.3	9	P30843_1full222_1G|BASR_ECOLI|Transcriptional regulatory protein BasR_P1
BASS_ECOLI	full	1	363	41181.7	0	Unmodified	P30844_1full363_1G_P1_1T	41181.7	8	P30844_1full363_1G|BASS_ECOLI|Sensor protein BasS_P1
BAX_ECOLI	full	1	274	31178.5	0	Unmodified	P27297_1full274_1G_P1_1T	31178.5	27	P27297_1full274_1G|BAX_ECOLI|Protein bax_P1
BCCP_ECOLI	full	1	156	16797.6	0	Unmodified	P0ABD8_1full156_1G_P1_1T	16797.6	8	P0ABD8_1full156_1G|BCCP_ECOLI|Biotin carboxyl carrier protein of acetyl-CoA carboxylase_P1
BCP_ECOLI	full	1	156	17897.9	0	Unmodified	P0AE52_1full156_1G_P1_1T	17897.9	13	P0AE52_1full156_1G|BCP_ECOLI|Putative peroxiredoxin bcp_P1
BCR_ECOLI	full	1	396	43599.9	0	Unmodified	P28246_1full396_1G_P1_1T	43599.9	6	P28246_1full396_1G|BCR_ECOLI|Bicyclomycin resistance protein_P1
BCSA_ECOLI	full	1	872	100612	0	Unmodified	P37653_1full872_1G_P1_1T	100612	33	P37653_1full872_1G|BCSA_ECOLI|Cellulose synthase catalytic subunit [UDP-forming]_P1
BCSB_ECOLI	signal-peptide	1	25	2924.44	0	Unmodified	P37652_1frag25_1G_P1_1T	2924.44	2	P37652_1frag25_1G|BCSB_ECOLI|Cyclic di-GMP-binding protein_P1
BCSB_ECOLI	chain	26	779	83474.1	0	Unmodified	P37652_26frag779_1G_P1_1T	83474.1	28	P37652_26frag779_1G|BCSB_ECOLI|Cyclic di-GMP-binding protein_P1
BCSB_ECOLI	full	1	779	86380.6	0	Unmodified	P37652_1full779_1G_P1_1T	86380.6	30	P37652_1full779_1G|BCSB_ECOLI|Cyclic di-GMP-binding protein_P1
BCSC_ECOLI	signal-peptide	1	23	2589.4	0	Unmodified	P37650_1frag23_1G_P1_1T	2589.4	1	P37650_1frag23_1G|BCSC_ECOLI|Cellulose synthase operon protein C_P1
BCSC_ECOLI	chain	24	1157	125533	0	Unmodified	P37650_24frag1157_1G_P1_1T	125533	42	P37650_24frag1157_1G|BCSC_ECOLI|Cellulose synthase operon protein C_P1
BCSC_ECOLI	full	1	1157	128104	0	Unmodified	P37650_1full1157_1G_P1_1T	128104	43	P37650_1full1157_1G|BCSC_ECOLI|Cellulose synthase operon protein C_P1
BCSE_ECOLI	full	1	523	60023.7	0	Unmodified	P37657_1full523_1G_P1_1T	60023.7	15	P37657_1full523_1G|BCSE_ECOLI|Protein BcsE homolog_P1
BCSF_ECOLI	full	1	63	7456.28	0	Unmodified	P0ADJ5_1full63_1G_P1_1T	7456.28	5	P0ADJ5_1full63_1G|BCSF_ECOLI|Protein BcsF homolog_P1
BCSG_ECOLI	full	1	559	62323.8	0	Unmodified	P37659_1full559_1G_P1_1T	62323.8	20	P37659_1full559_1G|BCSG_ECOLI|Protein BcsG homolog_P1
BCSQ_ECOLI	full	1	250	28226.3	0	Unmodified	P37655_1full250_1G_P1_1T	28226.3	3	P37655_1full250_1G|BCSQ_ECOLI|Putative cellulose biosynthesis protein BcsQ_P1
BDCA_ECOLI	full	1	237	24638.7	0	Unmodified	P39333_1full237_1G_P1_1T	24638.7	7	P39333_1full237_1G|BDCA_ECOLI|Cyclic-di-GMP-binding biofilm dispersal mediator protein_P1
BDCR_ECOLI	full	1	197	21837.1	0	Unmodified	P39334_1full197_1G_P1_1T	21837.1	8	P39334_1full197_1G|BDCR_ECOLI|HTH-type transcriptional repressor BdcR_P1
BDM_ECOLI	full	1	71	7989.88	0	Unmodified	P76127_1full71_1G_P1_1T	7989.88	1	P76127_1full71_1G|BDM_ECOLI|Protein bdm_P1
BEEE_ECOLI	full	1	157	18045	0	Unmodified	P75980_1full157_1G_P1_1T	18045	6	P75980_1full157_1G|BEEE_ECOLI|Putative protein BeeE_P1
BEPA_ECOLI	signal-peptide	1	27	2918.66	0	Unmodified	P66948_1frag27_1G_P1_1T	2918.66	2	P66948_1frag27_1G|BEPA_ECOLI|Beta-barrel assembly-enhancing protease_P1
BEPA_ECOLI	chain	28	487	51085.9	0	Unmodified	P66948_28frag487_1G_P1_1T	51085.9	12	P66948_28frag487_1G|BEPA_ECOLI|Beta-barrel assembly-enhancing protease_P1
BEPA_ECOLI	full	1	487	53986.5	0	Unmodified	P66948_1full487_1G_P1_1T	53986.5	14	P66948_1full487_1G|BEPA_ECOLI|Beta-barrel assembly-enhancing protease_P1
BETA_ECOLI	full	1	556	62471.6	0	Unmodified	P17444_1full556_1G_P1_1T	62471.6	15	P17444_1full556_1G|BETA_ECOLI|Oxygen-dependent choline dehydrogenase_P1
BETB_ECOLI	chain	2	490	53200.1	0	Unmodified	P17445_2frag490_1G_P1_1T	53200.1	21	P17445_2frag490_1G|BETB_ECOLI|NAD/NADP-dependent betaine aldehyde dehydrogenase_P1
BETB_ECOLI	full	1	490	53331.2	0	Unmodified	P17445_1full490_1G_P1_1T	53331.2	21	P17445_1full490_1G|BETB_ECOLI|NAD/NADP-dependent betaine aldehyde dehydrogenase_P1
BETI_ECOLI	full	1	195	21841.5	0	Unmodified	P17446_1full195_1G_P1_1T	21841.5	5	P17446_1full195_1G|BETI_ECOLI|HTH-type transcriptional regulator BetI_P1
BETT_ECOLI	full	1	677	76100.4	0	Unmodified	P0ABC9_1full677_1G_P1_1T	76100.4	17	P0ABC9_1full677_1G|BETT_ECOLI|High-affinity choline transport protein_P1
BFD_ECOLI	full	1	64	7633.84	0	Unmodified	P0AE56_1full64_1G_P1_1T	7633.84	6	P0AE56_1full64_1G|BFD_ECOLI|Bacterioferritin-associated ferredoxin_P1
BFR_ECOLI	full	1	158	18555.5	0	Unmodified	P0ABD3_1full158_1G_P1_1T	18555.5	9	P0ABD3_1full158_1G|BFR_ECOLI|Bacterioferritin_P1
BGA2_ECOLI	full	1	1030	118802	0	Unmodified	P06864_1full1030_1G_P1_1T	118802	32	P06864_1full1030_1G|BGA2_ECOLI|Evolved beta-galactosidase subunit alpha_P1
BGAL_ECOLI	chain	2	1024	117351	0	Unmodified	P00722_2frag1024_1G_P1_1T	117351	20	P00722_2frag1024_1G|BGAL_ECOLI|Beta-galactosidase_P1
BGAL_ECOLI	full	1	1024	117482	0	Unmodified	P00722_1full1024_1G_P1_1T	117482	20	P00722_1full1024_1G|BGAL_ECOLI|Beta-galactosidase_P1
BGLA_ECOLI	full	1	479	56143.5	0	Unmodified	Q46829_1full479_1G_P1_1T	56143.5	31	Q46829_1full479_1G|BGLA_ECOLI|6-phospho-beta-glucosidase BglA_P1
BGLB_ECOLI	full	1	470	53531.7	0	Unmodified	P11988_1full470_1G_P1_1T	53531.7	22	P11988_1full470_1G|BGLB_ECOLI|6-phospho-beta-glucosidase BglB_P1
BGLG_ECOLI	full	1	278	32360	0	Unmodified	P11989_1full278_1G_P1_1T	32360	14	P11989_1full278_1G|BGLG_ECOLI|Cryptic beta-glucoside bgl operon antiterminator_P1
BGLH_ECOLI	signal-peptide	1	25	2734.5	0	Unmodified	P26218_1frag25_1G_P1_1T	2734.5	0	P26218_1frag25_1G|BGLH_ECOLI|Cryptic outer membrane porin BglH_P1
BGLH_ECOLI	chain	26	538	58183.5	0	Unmodified	P26218_26frag538_1G_P1_1T	58183.5	35	P26218_26frag538_1G|BGLH_ECOLI|Cryptic outer membrane porin BglH_P1
BGLH_ECOLI	full	1	538	60900	0	Unmodified	P26218_1full538_1G_P1_1T	60900	35	P26218_1full538_1G|BGLH_ECOLI|Cryptic outer membrane porin BglH_P1
BGLJ_ECOLI	full	1	225	25921.5	0	Unmodified	P39404_1full225_1G_P1_1T	25921.5	11	P39404_1full225_1G|BGLJ_ECOLI|Transcriptional activator protein BglJ_P1
BGLR_ECOLI	full	1	603	69133.3	0	Unmodified	P05804_1full603_1G_P1_1T	69133.3	27	P05804_1full603_1G|BGLR_ECOLI|Beta-glucuronidase_P1
BGLX_ECOLI	signal-peptide	1	20	2135.17	0	Unmodified	P33363_1frag20_1G_P1_1T	2135.17	1	P33363_1frag20_1G|BGLX_ECOLI|Periplasmic beta-glucosidase_P1
BGLX_ECOLI	chain	21	765	81772.1	0	Unmodified	P33363_21frag765_1G_P1_1T	81772.1	52	P33363_21frag765_1G|BGLX_ECOLI|Periplasmic beta-glucosidase_P1
BGLX_ECOLI	full	1	765	83889.2	0	Unmodified	P33363_1full765_1G_P1_1T	83889.2	53	P33363_1full765_1G|BGLX_ECOLI|Periplasmic beta-glucosidase_P1
BHSA_ECOLI	signal-peptide	1	22	2316.26	0	Unmodified	P0AB40_1frag22_1G_P1_1T	2316.26	2	P0AB40_1frag22_1G|BHSA_ECOLI|Multiple stress resistance protein BhsA_P1
BHSA_ECOLI	chain	23	85	6559.38	0	Unmodified	P0AB40_23frag85_1G_P1_1T	6559.38	4	P0AB40_23frag85_1G|BHSA_ECOLI|Multiple stress resistance protein BhsA_P1
BHSA_ECOLI	full	1	85	8857.63	0	Unmodified	P0AB40_1full85_1G_P1_1T	8857.63	6	P0AB40_1full85_1G|BHSA_ECOLI|Multiple stress resistance protein BhsA_P1
BIOA_ECOLI	full	1	429	47962.8	0	Unmodified	P12995_1full429_1G_P1_1T	47962.8	11	P12995_1full429_1G|BIOA_ECOLI|Adenosylmethionine-8-amino-7-oxononanoate aminotransferase_P1
BIOB_ECOLI	full	1	346	39207.6	0	Unmodified	P12996_1full346_1G_P1_1T	39207.6	16	P12996_1full346_1G|BIOB_ECOLI|Biotin synthase_P1
BIOC_ECOLI	full	1	251	28412.6	0	Unmodified	P12999_1full251_1G_P1_1T	28412.6	5	P12999_1full251_1G|BIOC_ECOLI|Malonyl-[acyl-carrier protein] O-methyltransferase_P1
BIOD1_ECOLI	chain	2	225	24171.5	0	Unmodified	P13000_2frag225_1G_P1_1T	24171.5	8	P13000_2frag225_1G|BIOD1_ECOLI|ATP-dependent dethiobiotin synthetase BioD 1_P1
BIOD1_ECOLI	full	1	225	24302.5	0	Unmodified	P13000_1full225_1G_P1_1T	24302.5	8	P13000_1full225_1G|BIOD1_ECOLI|ATP-dependent dethiobiotin synthetase BioD 1_P1
BIOD2_ECOLI	full	1	231	25159.6	0	Unmodified	P0A6E9_1full231_1G_P1_1T	25159.6	10	P0A6E9_1full231_1G|BIOD2_ECOLI|ATP-dependent dethiobiotin synthetase BioD 2_P1
BIOF_ECOLI	chain	2	384	41778.4	0	Unmodified	P12998_2frag384_1G_P1_1T	41778.4	7	P12998_2frag384_1G|BIOF_ECOLI|8-amino-7-oxononanoate synthase_P1
BIOF_ECOLI	full	1	384	41909.5	0	Unmodified	P12998_1full384_1G_P1_1T	41909.5	7	P12998_1full384_1G|BIOF_ECOLI|8-amino-7-oxononanoate synthase_P1
BIOH_ECOLI	full	1	256	28738.1	0	Unmodified	P13001_1full256_1G_P1_1T	28738.1	10	P13001_1full256_1G|BIOH_ECOLI|Pimeloyl-[acyl-carrier protein] methyl ester esterase_P1
BIRA_ECOLI	full	1	321	35491.1	0	Unmodified	P06709_1full321_1G_P1_1T	35491.1	18	P06709_1full321_1G|BIRA_ECOLI|Bifunctional ligase/repressor BirA_P1
BISC_ECOLI	full	1	777	86542.8	0	Unmodified	P20099_1full777_1G_P1_1T	86542.8	22	P20099_1full777_1G|BISC_ECOLI|Biotin sulfoxide reductase_P1
BLC_ECOLI	signal-peptide	1	18	1826.09	0	Unmodified	P0A901_1frag18_1G_P1_1T	1826.09	0	P0A901_1frag18_1G|BLC_ECOLI|Outer membrane lipoprotein Blc_P1
BLC_ECOLI	chain	19	177	18201.1	0	Unmodified	P0A901_19frag177_1G_P1_1T	18201.1	7	P0A901_19frag177_1G|BLC_ECOLI|Outer membrane lipoprotein Blc_P1
BLC_ECOLI	full	1	177	20009.2	0	Unmodified	P0A901_1full177_1G_P1_1T	20009.2	7	P0A901_1full177_1G|BLC_ECOLI|Outer membrane lipoprotein Blc_P1
BLR_ECOLI	full	1	41	4561.46	0	Unmodified	P56976_1full41_1G_P1_1T	4561.46	1	P56976_1full41_1G|BLR_ECOLI|Divisome-associated membrane protein Blr_P1
BLUF_ECOLI	full	1	403	45727.6	0	Unmodified	P75990_1full403_1G_P1_1T	45727.6	22	P75990_1full403_1G|BLUF_ECOLI|Blue light- and temperature-regulated antirepressor BluF_P1
BLUR_ECOLI	full	1	243	28367.7	0	Unmodified	P75989_1full243_1G_P1_1T	28367.7	8	P75989_1full243_1G|BLUR_ECOLI|HTH-type transcriptional repressor BluR_P1
BOLA_ECOLI	full	1	105	12067.2	0	Unmodified	P0ABE2_1full105_1G_P1_1T	12067.2	3	P0ABE2_1full105_1G|BOLA_ECOLI|DNA-binding transcriptional regulator BolA_P1
BORD_ECOLI	signal-peptide	1	16	1703.04	0	Unmodified	P77330_1frag16_1G_P1_1T	1703.04	2	P77330_1frag16_1G|BORD_ECOLI|Prophage lipoprotein Bor homolog_P1
BORD_ECOLI	chain	17	97	8998.7	0	Unmodified	P77330_17frag97_1G_P1_1T	8998.7	7	P77330_17frag97_1G|BORD_ECOLI|Prophage lipoprotein Bor homolog_P1
BORD_ECOLI	full	1	97	10683.7	0	Unmodified	P77330_1full97_1G_P1_1T	10683.7	9	P77330_1full97_1G|BORD_ECOLI|Prophage lipoprotein Bor homolog_P1
BRNQ_ECOLI	full	1	439	46504	0	Unmodified	P0AD99_1full439_1G_P1_1T	46504	5	P0AD99_1full439_1G|BRNQ_ECOLI|Branched-chain amino acid transport system 2 carrier protein_P1
BSMA_ECOLI	signal-peptide	1	24	2774.59	0	Unmodified	P39297_1frag24_1G_P1_1T	2774.59	1	P39297_1frag24_1G|BSMA_ECOLI|Lipoprotein BsmA_P1
BSMA_ECOLI	chain	25	109	9370.83	0	Unmodified	P39297_25frag109_1G_P1_1T	9370.83	4	P39297_25frag109_1G|BSMA_ECOLI|Lipoprotein BsmA_P1
BSMA_ECOLI	full	1	109	12127.4	0	Unmodified	P39297_1full109_1G_P1_1T	12127.4	5	P39297_1full109_1G|BSMA_ECOLI|Lipoprotein BsmA_P1
BSSR_ECOLI	full	1	127	14753.6	0	Unmodified	P0AAY1_1full127_1G_P1_1T	14753.6	7	P0AAY1_1full127_1G|BSSR_ECOLI|Biofilm regulator BssR_P1
BSSS_ECOLI	full	1	84	9681.84	0	Unmodified	P0AB33_1full84_1G_P1_1T	9681.84	3	P0AB33_1full84_1G|BSSS_ECOLI|Biofilm regulator BssS_P1
BTUB_ECOLI	signal-peptide	1	20	2171.15	0	Unmodified	P06129_1frag20_1G_P1_1T	2171.15	2	P06129_1frag20_1G|BTUB_ECOLI|Vitamin B12 transporter BtuB_P1
BTUB_ECOLI	chain	21	614	66437.5	0	Unmodified	P06129_21frag614_1G_P1_1T	66437.5	19	P06129_21frag614_1G|BTUB_ECOLI|Vitamin B12 transporter BtuB_P1
BTUB_ECOLI	full	1	614	68590.7	0	Unmodified	P06129_1full614_1G_P1_1T	68590.7	21	P06129_1full614_1G|BTUB_ECOLI|Vitamin B12 transporter BtuB_P1
BTUC_ECOLI	full	1	326	35390.4	0	Unmodified	P06609_1full326_1G_P1_1T	35390.4	1	P06609_1full326_1G|BTUC_ECOLI|Vitamin B12 import system permease protein BtuC_P1
BTUD_ECOLI	full	1	249	27185.3	0	Unmodified	P06611_1full249_1G_P1_1T	27185.3	8	P06611_1full249_1G|BTUD_ECOLI|Vitamin B12 import ATP-binding protein BtuD_P1
BTUE_ECOLI	full	1	183	20723.6	0	Unmodified	P06610_1full183_1G_P1_1T	20723.6	12	P06610_1full183_1G|BTUE_ECOLI|Thioredoxin/glutathione peroxidase BtuE_P1
BTUF_ECOLI	signal-peptide	1	22	2439.4	0	Unmodified	P37028_1frag22_1G_P1_1T	2439.4	1	P37028_1frag22_1G|BTUF_ECOLI|Vitamin B12-binding protein_P1
BTUF_ECOLI	chain	23	266	27153.4	0	Unmodified	P37028_23frag266_1G_P1_1T	27153.4	13	P37028_23frag266_1G|BTUF_ECOLI|Vitamin B12-binding protein_P1
BTUF_ECOLI	full	1	266	29574.8	0	Unmodified	P37028_1full266_1G_P1_1T	29574.8	14	P37028_1full266_1G|BTUF_ECOLI|Vitamin B12-binding protein_P1
BTUR_ECOLI	full	1	196	22179.3	0	Unmodified	P0A9H5_1full196_1G_P1_1T	22179.3	10	P0A9H5_1full196_1G|BTUR_ECOLI|Cob(I)yrinic acid a,c-diamide adenosyltransferase_P1
C561_ECOLI	full	1	176	20442.9	0	Unmodified	P0ABE5_1full176_1G_P1_1T	20442.9	7	P0ABE5_1full176_1G|C561_ECOLI|Cytochrome b561_P1
C56H_ECOLI	full	1	176	20395.8	0	Unmodified	P76345_1full176_1G_P1_1T	20395.8	9	P76345_1full176_1G|C56H_ECOLI|Cytochrome b561 homolog 1_P1
C56I_ECOLI	full	1	188	20778.9	0	Unmodified	P75925_1full188_1G_P1_1T	20778.9	7	P75925_1full188_1G|C56I_ECOLI|Cytochrome b561 homolog 2_P1
CADB_ECOLI	full	1	444	47186.4	0	Unmodified	P0AAE8_1full444_1G_P1_1T	47186.4	12	P0AAE8_1full444_1G|CADB_ECOLI|Probable cadaverine/lysine antiporter_P1
CADC_ECOLI	full	1	512	58140	0	Unmodified	P23890_1full512_1G_P1_1T	58140	24	P23890_1full512_1G|CADC_ECOLI|Transcriptional activator CadC_P1
CAIA_ECOLI	full	1	380	43082.2	0	Unmodified	P60584_1full380_1G_P1_1T	43082.2	19	P60584_1full380_1G|CAIA_ECOLI|Crotonobetainyl-CoA dehydrogenase_P1
CAIB_ECOLI	full	1	405	45656.8	0	Unmodified	P31572_1full405_1G_P1_1T	45656.8	20	P31572_1full405_1G|CAIB_ECOLI|L-carnitine CoA-transferase_P1
CAIC_ECOLI	full	1	517	59739.9	0	Unmodified	P31552_1full517_1G_P1_1T	59739.9	24	P31552_1full517_1G|CAIC_ECOLI|Probable crotonobetaine/carnitine-CoA ligase_P1
CAID_ECOLI	chain	2	261	28186.6	0	Unmodified	P31551_2frag261_1G_P1_1T	28186.6	11	P31551_2frag261_1G|CAID_ECOLI|Carnitinyl-CoA dehydratase_P1
CAID_ECOLI	full	1	261	28317.7	0	Unmodified	P31551_1full261_1G_P1_1T	28317.7	11	P31551_1full261_1G|CAID_ECOLI|Carnitinyl-CoA dehydratase_P1
CAIE_ECOLI	full	1	196	21498.9	0	Unmodified	P39206_1full196_1G_P1_1T	21498.9	5	P39206_1full196_1G|CAIE_ECOLI|Carnitine operon protein CaiE_P1
CAIF_ECOLI	full	1	131	15726.2	0	Unmodified	P0AE58_1full131_1G_P1_1T	15726.2	9	P0AE58_1full131_1G|CAIF_ECOLI|Transcriptional activatory protein CaiF_P1
CAIT_ECOLI	full	1	504	57313	0	Unmodified	P31553_1full504_1G_P1_1T	57313	17	P31553_1full504_1G|CAIT_ECOLI|L-carnitine/gamma-butyrobetaine antiporter_P1
CAN_ECOLI	full	1	220	25446.1	0	Unmodified	P61517_1full220_1G_P1_1T	25446.1	10	P61517_1full220_1G|CAN_ECOLI|Carbonic anhydrase 2_P1
CAPP_ECOLI	full	1	883	99793	0	Unmodified	P00864_1full883_1G_P1_1T	99793	42	P00864_1full883_1G|CAPP_ECOLI|Phosphoenolpyruvate carboxylase_P1
CARA_ECOLI	full	1	382	41793.5	0	Unmodified	P0A6F1_1full382_1G_P1_1T	41793.5	20	P0A6F1_1full382_1G|CARA_ECOLI|Carbamoyl-phosphate synthase small chain_P1
CARB_ECOLI	chain	2	1073	118883	0	Unmodified	P00968_2frag1073_1G_P1_1T	118883	56	P00968_2frag1073_1G|CARB_ECOLI|Carbamoyl-phosphate synthase large chain_P1
CARB_ECOLI	full	1	1073	119014	0	Unmodified	P00968_1full1073_1G_P1_1T	119014	56	P00968_1full1073_1G|CARB_ECOLI|Carbamoyl-phosphate synthase large chain_P1
CAS1_ECOLI	full	1	305	33513.9	0	Unmodified	Q46896_1full305_1G_P1_1T	33513.9	14	Q46896_1full305_1G|CAS1_ECOLI|CRISPR-associated endonuclease Cas1_P1
CAS2_ECOLI	full	1	94	10519.6	0	Unmodified	P45956_1full94_1G_P1_1T	10519.6	1	P45956_1full94_1G|CAS2_ECOLI|CRISPR-associated endoribonuclease Cas2_P1
CAS3_ECOLI	full	1	888	101739	0	Unmodified	P38036_1full888_1G_P1_1T	101739	36	P38036_1full888_1G|CAS3_ECOLI|CRISPR-associated endonuclease/helicase Cas3_P1
CAS5_ECOLI	full	1	224	25526	0	Unmodified	Q46898_1full224_1G_P1_1T	25526	6	Q46898_1full224_1G|CAS5_ECOLI|CRISPR system Cascade subunit CasD_P1
CAS6_ECOLI	chain	2	199	22480.1	0	Unmodified	Q46897_2frag199_1G_P1_1T	22480.1	13	Q46897_2frag199_1G|CAS6_ECOLI|CRISPR system Cascade subunit CasE_P1
CAS6_ECOLI	full	1	199	22611.2	0	Unmodified	Q46897_1full199_1G_P1_1T	22611.2	13	Q46897_1full199_1G|CAS6_ECOLI|CRISPR system Cascade subunit CasE_P1
CASC_ECOLI	chain	2	363	40151.5	0	Unmodified	Q46899_2frag363_1G_P1_1T	40151.5	21	Q46899_2frag363_1G|CASC_ECOLI|CRISPR system Cascade subunit CasC_P1
CASC_ECOLI	full	1	363	40282.6	0	Unmodified	Q46899_1full363_1G_P1_1T	40282.6	21	Q46899_1full363_1G|CASC_ECOLI|CRISPR system Cascade subunit CasC_P1
CATE_ECOLI	full	1	753	84521	0	Unmodified	P21179_1full753_1G_P1_1T	84521	37	P21179_1full753_1G|CATE_ECOLI|Catalase HPII_P1
CBEA_ECOLI	full	1	122	13934.8	0	Unmodified	P76364_1full122_1G_P1_1T	13934.8	4	P76364_1full122_1G|CBEA_ECOLI|Cytoskeleton bundling-enhancing protein CbeA_P1
CBL_ECOLI	full	1	316	35963	0	Unmodified	Q47083_1full316_1G_P1_1T	35963	9	Q47083_1full316_1G|CBL_ECOLI|HTH-type transcriptional regulator cbl_P1
CBPA_ECOLI	full	1	306	34602	0	Unmodified	P36659_1full306_1G_P1_1T	34602	21	P36659_1full306_1G|CBPA_ECOLI|Curved DNA-binding protein_P1
CBPM_ECOLI	full	1	101	11570.1	0	Unmodified	P63264_1full101_1G_P1_1T	11570.1	1	P63264_1full101_1G|CBPM_ECOLI|Chaperone modulatory protein CbpM_P1
CBRA_ECOLI	full	1	354	40789.3	0	Unmodified	P31456_1full354_1G_P1_1T	40789.3	27	P31456_1full354_1G|CBRA_ECOLI|Protein CbrA_P1
CBRB_ECOLI	full	1	155	16932.4	0	Unmodified	P31468_1full155_1G_P1_1T	16932.4	4	P31468_1full155_1G|CBRB_ECOLI|Inner membrane protein CbrB_P1
CBRC_ECOLI	full	1	195	23291.6	0	Unmodified	P31469_1full195_1G_P1_1T	23291.6	10	P31469_1full195_1G|CBRC_ECOLI|UPF0167 protein CbrC_P1
CBTA_ECOLI	full	1	124	14036.4	0	Unmodified	P64524_1full124_1G_P1_1T	14036.4	4	P64524_1full124_1G|CBTA_ECOLI|Cytoskeleton-binding toxin CbtA_P1
CCA_ECOLI	full	1	412	46843.3	0	Unmodified	P06961_1full412_1G_P1_1T	46843.3	15	P06961_1full412_1G|CCA_ECOLI|Multifunctional CCA protein_P1
CCMA_ECOLI	full	1	207	23177.1	0	Unmodified	P33931_1full207_1G_P1_1T	23177.1	3	P33931_1full207_1G|CCMA_ECOLI|Cytochrome c biogenesis ATP-binding export protein CcmA_P1
CCMB_ECOLI	full	1	220	23619.3	0	Unmodified	P0ABL8_1full220_1G_P1_1T	23619.3	2	P0ABL8_1full220_1G|CCMB_ECOLI|Heme exporter protein B_P1
CCMC_ECOLI	full	1	245	27972	0	Unmodified	P0ABM1_1full245_1G_P1_1T	27972	6	P0ABM1_1full245_1G|CCMC_ECOLI|Heme exporter protein C_P1
CCMD_ECOLI	full	1	69	7740.07	0	Unmodified	P0ABM5_1full69_1G_P1_1T	7740.07	0	P0ABM5_1full69_1G|CCMD_ECOLI|Heme exporter protein D_P1
CCME_ECOLI	full	1	159	17808.3	0	Unmodified	P69490_1full159_1G_P1_1T	17808.3	8	P69490_1full159_1G|CCME_ECOLI|Cytochrome c-type biogenesis protein CcmE_P1
CCMF_ECOLI	full	1	647	71675.2	0	Unmodified	P33927_1full647_1G_P1_1T	71675.2	13	P33927_1full647_1G|CCMF_ECOLI|Cytochrome c-type biogenesis protein CcmF_P1
CCMH_ECOLI	signal-peptide	1	18	1922.06	0	Unmodified	P0ABM9_1frag18_1G_P1_1T	1922.06	0	P0ABM9_1frag18_1G|CCMH_ECOLI|Cytochrome c-type biogenesis protein CcmH_P1
CCMH_ECOLI	chain	19	350	37378.3	0	Unmodified	P0ABM9_19frag350_1G_P1_1T	37378.3	13	P0ABM9_19frag350_1G|CCMH_ECOLI|Cytochrome c-type biogenesis protein CcmH_P1
CCMH_ECOLI	full	1	350	39282.4	0	Unmodified	P0ABM9_1full350_1G_P1_1T	39282.4	13	P0ABM9_1full350_1G|CCMH_ECOLI|Cytochrome c-type biogenesis protein CcmH_P1
CDAR_ECOLI	full	1	385	43845.9	0	Unmodified	P37047_1full385_1G_P1_1T	43845.9	9	P37047_1full385_1G|CDAR_ECOLI|Carbohydrate diacid regulator_P1
CDD_ECOLI	full	1	294	31885.2	0	Unmodified	P0ABF6_1full294_1G_P1_1T	31885.2	10	P0ABF6_1full294_1G|CDD_ECOLI|Cytidine deaminase_P1
CDH_ECOLI	full	1	251	28732.9	0	Unmodified	P06282_1full251_1G_P1_1T	28732.9	9	P06282_1full251_1G|CDH_ECOLI|CDP-diacylglycerol pyrophosphatase_P1
CDSA_ECOLI	full	1	285	31733.3	0	Unmodified	P0ABG1_1full285_1G_P1_1T	31733.3	9	P0ABG1_1full285_1G|CDSA_ECOLI|Phosphatidate cytidylyltransferase_P1
CEDA_ECOLI	full	1	80	9402.87	0	Unmodified	P0AE60_1full80_1G_P1_1T	9402.87	4	P0AE60_1full80_1G|CEDA_ECOLI|Cell division activator CedA_P1
CFA_ECOLI	chain	2	382	44358.1	0	Unmodified	P0A9H7_2frag382_1G_P1_1T	44358.1	19	P0A9H7_2frag382_1G|CFA_ECOLI|Cyclopropane-fatty-acyl-phospholipid synthase_P1
CFA_ECOLI	full	1	382	44489.1	0	Unmodified	P0A9H7_1full382_1G_P1_1T	44489.1	19	P0A9H7_1full382_1G|CFA_ECOLI|Cyclopropane-fatty-acyl-phospholipid synthase_P1
CH10_ECOLI	full	1	97	10444.7	0	Unmodified	P0A6F9_1full97_1G_P1_1T	10444.7	8	P0A6F9_1full97_1G|CH10_ECOLI|10 kDa chaperonin_P1
CH60_ECOLI	chain	2	548	57653.3	0	Unmodified	P0A6F5_2frag548_1G_P1_1T	57653.3	40	P0A6F5_2frag548_1G|CH60_ECOLI|60 kDa chaperonin_P1
CH60_ECOLI	full	1	548	57784.3	0	Unmodified	P0A6F5_1full548_1G_P1_1T	57784.3	40	P0A6F5_1full548_1G|CH60_ECOLI|60 kDa chaperonin_P1
CHAA_ECOLI	full	1	366	39264.2	0	Unmodified	P31801_1full366_1G_P1_1T	39264.2	8	P31801_1full366_1G|CHAA_ECOLI|Sodium-potassium/proton antiporter ChaA_P1
CHAB_ECOLI	full	1	76	9035.53	0	Unmodified	P0AE63_1full76_1G_P1_1T	9035.53	12	P0AE63_1full76_1G|CHAB_ECOLI|Putative cation transport regulator ChaB_P1
CHAC_ECOLI	full	1	231	25886	0	Unmodified	P39163_1full231_1G_P1_1T	25886	6	P39163_1full231_1G|CHAC_ECOLI|Glutathione-specific gamma-glutamylcyclotransferase_P1
CHBF_ECOLI	chain	2	450	51012.7	0	Unmodified	P17411_2frag450_1G_P1_1T	51012.7	33	P17411_2frag450_1G|CHBF_ECOLI|6-phospho-beta-glucosidase_P1
CHBF_ECOLI	full	1	450	51143.8	0	Unmodified	P17411_1full450_1G_P1_1T	51143.8	33	P17411_1full450_1G|CHBF_ECOLI|6-phospho-beta-glucosidase_P1
CHBG_ECOLI	full	1	249	27967.3	0	Unmodified	P37794_1full249_1G_P1_1T	27967.3	5	P37794_1full249_1G|CHBG_ECOLI|Chitooligosaccharide deacetylase ChbG_P1
CHBR_ECOLI	full	1	280	33140	0	Unmodified	P17410_1full280_1G_P1_1T	33140	17	P17410_1full280_1G|CHBR_ECOLI|HTH-type transcriptional regulator ChbR_P1
CHEA_ECOLI	full	1	654	71701.4	0	Unmodified	P07363_1full654_1G_P1_1T	71701.4	24	P07363_1full654_1G|CHEA_ECOLI|Chemotaxis protein CheA_P1
CHEB_ECOLI	full	1	349	37742.8	0	Unmodified	P07330_1full349_1G_P1_1T	37742.8	16	P07330_1full349_1G|CHEB_ECOLI|Chemotaxis response regulator protein-glutamate methylesterase_P1
CHER_ECOLI	full	1	286	32999	0	Unmodified	P07364_1full286_1G_P1_1T	32999	7	P07364_1full286_1G|CHER_ECOLI|Chemotaxis protein methyltransferase_P1
CHEW_ECOLI	full	1	167	18112.6	0	Unmodified	P0A964_1full167_1G_P1_1T	18112.6	5	P0A964_1full167_1G|CHEW_ECOLI|Chemotaxis protein CheW_P1
CHEY_ECOLI	chain	2	129	14045.4	0	Unmodified	P0AE67_2frag129_1G_P1_1T	14045.4	11	P0AE67_2frag129_1G|CHEY_ECOLI|Chemotaxis protein CheY_P1
CHEY_ECOLI	full	1	129	14176.4	0	Unmodified	P0AE67_1full129_1G_P1_1T	14176.4	11	P0AE67_1full129_1G|CHEY_ECOLI|Chemotaxis protein CheY_P1
CHEZ_ECOLI	full	1	214	24009.1	0	Unmodified	P0A9H9_1full214_1G_P1_1T	24009.1	6	P0A9H9_1full214_1G|CHEZ_ECOLI|Protein phosphatase CheZ_P1
CHIA_ECOLI	signal-peptide	1	24	2581.38	0	Unmodified	P13656_1frag24_1G_P1_1T	2581.38	2	P13656_1frag24_1G|CHIA_ECOLI|Probable bifunctional chitinase/lysozyme_P1
CHIA_ECOLI	chain	25	897	95607.7	0	Unmodified	P13656_25frag897_1G_P1_1T	95607.7	52	P13656_25frag897_1G|CHIA_ECOLI|Probable bifunctional chitinase/lysozyme_P1
CHIA_ECOLI	full	1	897	98171	0	Unmodified	P13656_1full897_1G_P1_1T	98171	54	P13656_1full897_1G|CHIA_ECOLI|Probable bifunctional chitinase/lysozyme_P1
CHIP_ECOLI	signal-peptide	1	32	3337.7	0	Unmodified	P75733_1frag32_1G_P1_1T	3337.7	1	P75733_1frag32_1G|CHIP_ECOLI|Chitoporin_P1
CHIP_ECOLI	chain	33	468	49635.7	0	Unmodified	P75733_33frag468_1G_P1_1T	49635.7	25	P75733_33frag468_1G|CHIP_ECOLI|Chitoporin_P1
CHIP_ECOLI	full	1	468	52955.4	0	Unmodified	P75733_1full468_1G_P1_1T	52955.4	26	P75733_1full468_1G|CHIP_ECOLI|Chitoporin_P1
CHIQ_ECOLI	signal-peptide	1	16	1687.05	0	Unmodified	P75734_1frag16_1G_P1_1T	1687.05	2	P75734_1frag16_1G|CHIQ_ECOLI|Uncharacterized lipoprotein ChiQ_P1
CHIQ_ECOLI	chain	17	108	10687.2	0	Unmodified	P75734_17frag108_1G_P1_1T	10687.2	8	P75734_17frag108_1G|CHIQ_ECOLI|Uncharacterized lipoprotein ChiQ_P1
CHIQ_ECOLI	full	1	108	12356.3	0	Unmodified	P75734_1full108_1G_P1_1T	12356.3	10	P75734_1full108_1G|CHIQ_ECOLI|Uncharacterized lipoprotein ChiQ_P1
CHO_ECOLI	full	1	295	34318.9	0	Unmodified	P76213_1full295_1G_P1_1T	34318.9	11	P76213_1full295_1G|CHO_ECOLI|Excinuclease cho_P1
CHPB_ECOLI	full	1	116	12565.6	0	Unmodified	P33647_1full116_1G_P1_1T	12565.6	3	P33647_1full116_1G|CHPB_ECOLI|Endoribonuclease ChpB_P1
CHPS_ECOLI	full	1	83	9346.72	0	Unmodified	P08365_1full83_1G_P1_1T	9346.72	3	P08365_1full83_1G|CHPS_ECOLI|Antitoxin ChpS_P1
CHRR_ECOLI	full	1	188	20483.7	0	Unmodified	P0AGE6_1full188_1G_P1_1T	20483.7	8	P0AGE6_1full188_1G|CHRR_ECOLI|Chromate reductase_P1
CILA_ECOLI	full	1	510	55730.8	0	Unmodified	P75726_1full510_1G_P1_1T	55730.8	17	P75726_1full510_1G|CILA_ECOLI|Citrate lyase alpha chain_P1
CINAL_ECOLI	full	1	400	44546.8	0	Unmodified	P77808_1full400_1G_P1_1T	44546.8	8	P77808_1full400_1G|CINAL_ECOLI|NMN amidohydrolase-like protein YfaY_P1
CIRA_ECOLI	signal-peptide	1	25	2876.5	0	Unmodified	P17315_1frag25_1G_P1_1T	2876.5	0	P17315_1frag25_1G|CIRA_ECOLI|Colicin I receptor_P1
CIRA_ECOLI	chain	26	663	71492.4	0	Unmodified	P17315_26frag663_1G_P1_1T	71492.4	34	P17315_26frag663_1G|CIRA_ECOLI|Colicin I receptor_P1
CIRA_ECOLI	full	1	663	74350.9	0	Unmodified	P17315_1full663_1G_P1_1T	74350.9	34	P17315_1full663_1G|CIRA_ECOLI|Colicin I receptor_P1
CISY_ECOLI	full	1	427	48567.4	0	Unmodified	P0ABH7_1full427_1G_P1_1T	48567.4	23	P0ABH7_1full427_1G|CISY_ECOLI|Citrate synthase_P1
CITC_ECOLI	full	1	352	40636.1	0	Unmodified	P77390_1full352_1G_P1_1T	40636.1	16	P77390_1full352_1G|CITC_ECOLI|[Citrate [pro-3S]-lyase] ligase_P1
CITD_ECOLI	full	1	98	10820.7	0	Unmodified	P69330_1full98_1G_P1_1T	10820.7	3	P69330_1full98_1G|CITD_ECOLI|Citrate lyase acyl carrier protein_P1
CITE_ECOLI	full	1	302	33275.4	0	Unmodified	P0A9I1_1full302_1G_P1_1T	33275.4	9	P0A9I1_1full302_1G|CITE_ECOLI|Citrate lyase subunit beta_P1
CITG_ECOLI	full	1	292	32071.5	0	Unmodified	P77231_1full292_1G_P1_1T	32071.5	6	P77231_1full292_1G|CITG_ECOLI|2-(5''-triphosphoribosyl)-3'-dephosphocoenzyme-A synthase_P1
CITT_ECOLI	full	1	487	53470.7	0	Unmodified	P0AE74_1full487_1G_P1_1T	53470.7	16	P0AE74_1full487_1G|CITT_ECOLI|Citrate carrier_P1
CITX_ECOLI	full	1	183	20525.8	0	Unmodified	P0A6G5_1full183_1G_P1_1T	20525.8	5	P0A6G5_1full183_1G|CITX_ECOLI|Apo-citrate lyase phosphoribosyl-dephospho-CoA transferase_P1
CLCA_ECOLI	full	1	473	50591.3	0	Unmodified	P37019_1full473_1G_P1_1T	50591.3	13	P37019_1full473_1G|CLCA_ECOLI|H(+)/Cl(-) exchange transporter ClcA_P1
CLCB_ECOLI	full	1	418	44620.7	0	Unmodified	P76175_1full418_1G_P1_1T	44620.7	5	P76175_1full418_1G|CLCB_ECOLI|Voltage-gated ClC-type chloride channel ClcB_P1
CLPA_ECOLI	full	1	758	84678.6	0	Unmodified	P0ABH9_1full758_1G_P1_1T	84678.6	44	P0ABH9_1full758_1G|CLPA_ECOLI|ATP-dependent Clp protease ATP-binding subunit ClpA_P1
CLPB_ECOLI	full	1	857	96049.6	0	Unmodified	P63284_1full857_1G_P1_1T	96049.6	44	P63284_1full857_1G|CLPB_ECOLI|Chaperone protein ClpB_P1
CLPP_ECOLI	propeptide	1	14	1640.67	0	Unmodified	P0A6G7_1frag14_1G_P1_1T	1640.67	0	P0A6G7_1frag14_1G|CLPP_ECOLI|ATP-dependent Clp protease proteolytic subunit_P1
CLPP_ECOLI	chain	15	207	21719.1	0	Unmodified	P0A6G7_15frag207_1G_P1_1T	21719.1	7	P0A6G7_15frag207_1G|CLPP_ECOLI|ATP-dependent Clp protease proteolytic subunit_P1
CLPP_ECOLI	full	1	207	23341.8	0	Unmodified	P0A6G7_1full207_1G_P1_1T	23341.8	7	P0A6G7_1full207_1G|CLPP_ECOLI|ATP-dependent Clp protease proteolytic subunit_P1
CLPS_ECOLI	full	1	106	12357.3	0	Unmodified	P0A8Q6_1full106_1G_P1_1T	12357.3	9	P0A8Q6_1full106_1G|CLPS_ECOLI|ATP-dependent Clp protease adapter protein ClpS_P1
CLPX_ECOLI	chain	2	424	46859.8	0	Unmodified	P0A6H1_2frag424_1G_P1_1T	46859.8	33	P0A6H1_2frag424_1G|CLPX_ECOLI|ATP-dependent Clp protease ATP-binding subunit ClpX_P1
CLPX_ECOLI	full	1	424	46990.8	0	Unmodified	P0A6H1_1full424_1G_P1_1T	46990.8	33	P0A6H1_1full424_1G|CLPX_ECOLI|ATP-dependent Clp protease ATP-binding subunit ClpX_P1
CLSA_ECOLI	full	1	486	55199.9	0	Unmodified	P0A6H8_1full486_1G_P1_1T	55199.9	16	P0A6H8_1full486_1G|CLSA_ECOLI|Cardiolipin synthase A_P1
CLSB_ECOLI	full	1	413	47846	0	Unmodified	P0AA84_1full413_1G_P1_1T	47846	16	P0AA84_1full413_1G|CLSB_ECOLI|Cardiolipin synthase B_P1
CLSC_ECOLI	full	1	473	53979.5	0	Unmodified	P75919_1full473_1G_P1_1T	53979.5	22	P75919_1full473_1G|CLSC_ECOLI|Cardiolipin synthase C_P1
CMOA_ECOLI	full	1	247	28059.1	0	Unmodified	P76290_1full247_1G_P1_1T	28059.1	9	P76290_1full247_1G|CMOA_ECOLI|Carboxy-S-adenosyl-L-methionine synthase_P1
CMOB_ECOLI	full	1	323	37274.4	0	Unmodified	P76291_1full323_1G_P1_1T	37274.4	15	P76291_1full323_1G|CMOB_ECOLI|tRNA U34 carboxymethyltransferase_P1
CMOM_ECOLI	full	1	261	30143.4	0	Unmodified	P36566_1full261_1G_P1_1T	30143.4	15	P36566_1full261_1G|CMOM_ECOLI|tRNA 5-carboxymethoxyuridine methyltransferase_P1
CNU_ECOLI	full	1	71	8443.36	0	Unmodified	P64467_1full71_1G_P1_1T	8443.36	4	P64467_1full71_1G|CNU_ECOLI|OriC-binding nucleoid-associated protein_P1
COAA_ECOLI	full	1	316	36481.3	0	Unmodified	P0A6I3_1full316_1G_P1_1T	36481.3	18	P0A6I3_1full316_1G|COAA_ECOLI|Pantothenate kinase_P1
COABC_ECOLI	chain	2	406	43660	0	Unmodified	P0ABQ0_2frag406_1G_P1_1T	43660	19	P0ABQ0_2frag406_1G|COABC_ECOLI|Coenzyme A biosynthesis bifunctional protein CoaBC_P1
COABC_ECOLI	full	1	406	43791	0	Unmodified	P0ABQ0_1full406_1G_P1_1T	43791	19	P0ABQ0_1full406_1G|COABC_ECOLI|Coenzyme A biosynthesis bifunctional protein CoaBC_P1
COAD_ECOLI	full	1	159	17873.2	0	Unmodified	P0A6I6_1full159_1G_P1_1T	17873.2	6	P0A6I6_1full159_1G|COAD_ECOLI|Phosphopantetheine adenylyltransferase_P1
COAE_ECOLI	full	1	206	22656	0	Unmodified	P0A6I9_1full206_1G_P1_1T	22656	6	P0A6I9_1full206_1G|COAE_ECOLI|Dephospho-CoA kinase_P1
COBC_ECOLI	full	1	203	23472.8	0	Unmodified	P52086_1full203_1G_P1_1T	23472.8	1	P52086_1full203_1G|COBC_ECOLI|Adenosylcobalamin/alpha-ribazole phosphatase_P1
COBS_ECOLI	full	1	247	26628.5	0	Unmodified	P36561_1full247_1G_P1_1T	26628.5	4	P36561_1full247_1G|COBS_ECOLI|Adenosylcobinamide-GDP ribazoletransferase_P1
COBT_ECOLI	full	1	359	37401.5	0	Unmodified	P36562_1full359_1G_P1_1T	37401.5	12	P36562_1full359_1G|COBT_ECOLI|Nicotinate-nucleotide--dimethylbenzimidazole phosphoribosyltransferase_P1
COBU_ECOLI	full	1	181	20362.4	0	Unmodified	P0AE76_1full181_1G_P1_1T	20362.4	5	P0AE76_1full181_1G|COBU_ECOLI|Bifunctional adenosylcobalamin biosynthesis protein CobU_P1
CODA_ECOLI	chain	2	427	47705.4	0	Unmodified	P25524_2frag427_1G_P1_1T	47705.4	13	P25524_2frag427_1G|CODA_ECOLI|Cytosine deaminase_P1
CODA_ECOLI	full	1	427	47836.4	0	Unmodified	P25524_1full427_1G_P1_1T	47836.4	13	P25524_1full427_1G|CODA_ECOLI|Cytosine deaminase_P1
CODB_ECOLI	full	1	419	43799.4	0	Unmodified	P0AA82_1full419_1G_P1_1T	43799.4	8	P0AA82_1full419_1G|CODB_ECOLI|Cytosine permease_P1
COF_ECOLI	full	1	272	30798.4	0	Unmodified	P46891_1full272_1G_P1_1T	30798.4	6	P46891_1full272_1G|COF_ECOLI|HMP-PP phosphatase_P1
COHE_ECOLI	full	1	224	25475.8	0	Unmodified	P75974_1full224_1G_P1_1T	25475.8	14	P75974_1full224_1G|COHE_ECOLI|Prophage repressor CohE_P1
COMR_ECOLI	full	1	210	23907	0	Unmodified	P75952_1full210_1G_P1_1T	23907	13	P75952_1full210_1G|COMR_ECOLI|HTH-type transcriptional repressor ComR_P1
COPA_ECOLI	chain	2	834	88253.3	0	Unmodified	Q59385_2frag834_1G_P1_1T	88253.3	28	Q59385_2frag834_1G|COPA_ECOLI|Copper-exporting P-type ATPase A_P1
COPA_ECOLI	full	1	834	88384.3	0	Unmodified	Q59385_1full834_1G_P1_1T	88384.3	28	Q59385_1full834_1G|COPA_ECOLI|Copper-exporting P-type ATPase A_P1
CORA_ECOLI	full	1	316	36687.7	0	Unmodified	P0ABI4_1full316_1G_P1_1T	36687.7	8	P0ABI4_1full316_1G|CORA_ECOLI|Magnesium transport protein CorA_P1
CORC_ECOLI	full	1	292	33430.7	0	Unmodified	P0AE78_1full292_1G_P1_1T	33430.7	12	P0AE78_1full292_1G|CORC_ECOLI|Magnesium and cobalt efflux protein CorC_P1
CPDA_ECOLI	full	1	275	31251.8	0	Unmodified	P0AEW4_1full275_1G_P1_1T	31251.8	6	P0AEW4_1full275_1G|CPDA_ECOLI|3',5'-cyclic adenosine monophosphate phosphodiesterase CpdA_P1
CPDB_ECOLI	signal-peptide	1	19	1942.11	0	Unmodified	P08331_1frag19_1G_P1_1T	1942.11	1	P08331_1frag19_1G|CPDB_ECOLI|2',3'-cyclic-nucleotide 2'-phosphodiesterase/3'-nucleotidase_P1
CPDB_ECOLI	chain	20	647	69378.5	0	Unmodified	P08331_20frag647_1G_P1_1T	69378.5	49	P08331_20frag647_1G|CPDB_ECOLI|2',3'-cyclic-nucleotide 2'-phosphodiesterase/3'-nucleotidase_P1
CPDB_ECOLI	full	1	647	71302.6	0	Unmodified	P08331_1full647_1G_P1_1T	71302.6	50	P08331_1full647_1G|CPDB_ECOLI|2',3'-cyclic-nucleotide 2'-phosphodiesterase/3'-nucleotidase_P1
CPOB_ECOLI	signal-peptide	1	26	2799.49	0	Unmodified	P45955_1frag26_1G_P1_1T	2799.49	0	P45955_1frag26_1G|CPOB_ECOLI|Cell division coordinator CpoB_P1
CPOB_ECOLI	chain	27	263	25568.9	0	Unmodified	P45955_27frag263_1G_P1_1T	25568.9	17	P45955_27frag263_1G|CPOB_ECOLI|Cell division coordinator CpoB_P1
CPOB_ECOLI	full	1	263	28350.4	0	Unmodified	P45955_1full263_1G_P1_1T	28350.4	17	P45955_1full263_1G|CPOB_ECOLI|Cell division coordinator CpoB_P1
CPXA_ECOLI	full	1	457	51720.2	0	Unmodified	P0AE82_1full457_1G_P1_1T	51720.2	16	P0AE82_1full457_1G|CPXA_ECOLI|Sensor histidine kinase CpxA_P1
CPXP_ECOLI	signal-peptide	1	21	2115.12	0	Unmodified	P0AE85_1frag21_1G_P1_1T	2115.12	0	P0AE85_1frag21_1G|CPXP_ECOLI|Periplasmic protein CpxP_P1
CPXP_ECOLI	chain	22	166	16896.3	0	Unmodified	P0AE85_22frag166_1G_P1_1T	16896.3	5	P0AE85_22frag166_1G|CPXP_ECOLI|Periplasmic protein CpxP_P1
CPXP_ECOLI	full	1	166	18993.4	0	Unmodified	P0AE85_1full166_1G_P1_1T	18993.4	5	P0AE85_1full166_1G|CPXP_ECOLI|Periplasmic protein CpxP_P1
CPXR_ECOLI	full	1	232	26375.9	0	Unmodified	P0AE88_1full232_1G_P1_1T	26375.9	10	P0AE88_1full232_1G|CPXR_ECOLI|Transcriptional regulatory protein CpxR_P1
CRA_ECOLI	full	1	334	38243	0	Unmodified	P0ACP1_1full334_1G_P1_1T	38243	12	P0ACP1_1full334_1G|CRA_ECOLI|Catabolite repressor/activator_P1
CRCB_ECOLI	full	1	127	13833.3	0	Unmodified	P37002_1full127_1G_P1_1T	13833.3	1	P37002_1full127_1G|CRCB_ECOLI|Putative fluoride ion transporter CrcB_P1
CREA_ECOLI	signal-peptide	1	21	2364.38	0	Unmodified	P0AE91_1frag21_1G_P1_1T	2364.38	2	P0AE91_1frag21_1G|CREA_ECOLI|Protein CreA_P1
CREA_ECOLI	chain	22	157	14984.9	0	Unmodified	P0AE91_22frag157_1G_P1_1T	14984.9	13	P0AE91_22frag157_1G|CREA_ECOLI|Protein CreA_P1
CREA_ECOLI	full	1	157	17331.3	0	Unmodified	P0AE91_1full157_1G_P1_1T	17331.3	15	P0AE91_1full157_1G|CREA_ECOLI|Protein CreA_P1
CREB_ECOLI	full	1	229	26295	0	Unmodified	P08368_1full229_1G_P1_1T	26295	9	P08368_1full229_1G|CREB_ECOLI|Transcriptional regulatory protein CreB_P1
CREC_ECOLI	full	1	474	52329	0	Unmodified	P08401_1full474_1G_P1_1T	52329	16	P08401_1full474_1G|CREC_ECOLI|Sensor protein CreC_P1
CRED_ECOLI	full	1	450	49999.2	0	Unmodified	P08369_1full450_1G_P1_1T	49999.2	18	P08369_1full450_1G|CRED_ECOLI|Inner membrane protein CreD_P1
CRFC_ECOLI	full	1	742	84999.7	0	Unmodified	P0DM85_1full742_1G_P1_1T	84999.7	21	P0DM85_1full742_1G|CRFC_ECOLI|Clamp-binding protein CrfC_P1
CRL_ECOLI	chain	2	133	15781.2	0	Unmodified	P24251_2frag133_1G_P1_1T	15781.2	12	P24251_2frag133_1G|CRL_ECOLI|Sigma factor-binding protein Crl_P1
CRL_ECOLI	full	1	133	15912.2	0	Unmodified	P24251_1full133_1G_P1_1T	15912.2	12	P24251_1full133_1G|CRL_ECOLI|Sigma factor-binding protein Crl_P1
CROE_ECOLI	full	1	66	7470.01	0	Unmodified	P75975_1full66_1G_P1_1T	7470.01	9	P75975_1full66_1G|CROE_ECOLI|Prophage transcriptional regulatory protein_P1
CRP_ECOLI	chain	2	210	23785.6	0	Unmodified	P0ACJ8_2frag210_1G_P1_1T	23785.6	15	P0ACJ8_2frag210_1G|CRP_ECOLI|cAMP-activated global transcriptional regulator CRP_P1
CRP_ECOLI	full	1	210	23916.7	0	Unmodified	P0ACJ8_1full210_1G_P1_1T	23916.7	15	P0ACJ8_1full210_1G|CRP_ECOLI|cAMP-activated global transcriptional regulator CRP_P1
CSDA_ECOLI	full	1	401	43523.2	0	Unmodified	Q46925_1full401_1G_P1_1T	43523.2	11	Q46925_1full401_1G|CSDA_ECOLI|Cysteine desulfurase CsdA_P1
CSDE_ECOLI	full	1	147	16043.4	0	Unmodified	P0AGF2_1full147_1G_P1_1T	16043.4	7	P0AGF2_1full147_1G|CSDE_ECOLI|Sulfur acceptor protein CsdE_P1
CSE1_ECOLI	full	1	502	56693.3	0	Unmodified	Q46901_1full502_1G_P1_1T	56693.3	25	Q46901_1full502_1G|CSE1_ECOLI|CRISPR system Cascade subunit CasA_P1
CSE2_ECOLI	full	1	160	18843.8	0	Unmodified	P76632_1full160_1G_P1_1T	18843.8	5	P76632_1full160_1G|CSE2_ECOLI|CRISPR system Cascade subunit CasB_P1
CSGA_ECOLI	signal-peptide	1	20	1989.2	0	Unmodified	P28307_1frag20_1G_P1_1T	1989.2	2	P28307_1frag20_1G|CSGA_ECOLI|Major curlin subunit_P1
CSGA_ECOLI	chain	21	151	13101	0	Unmodified	P28307_21frag151_1G_P1_1T	13101	2	P28307_21frag151_1G|CSGA_ECOLI|Major curlin subunit_P1
CSGA_ECOLI	full	1	151	15072.2	0	Unmodified	P28307_1full151_1G_P1_1T	15072.2	4	P28307_1full151_1G|CSGA_ECOLI|Major curlin subunit_P1
CSGB_ECOLI	signal-peptide	1	21	2219.26	0	Unmodified	P0ABK7_1frag21_1G_P1_1T	2219.26	2	P0ABK7_1frag21_1G|CSGB_ECOLI|Minor curlin subunit_P1
CSGB_ECOLI	chain	22	151	13734.9	0	Unmodified	P0ABK7_22frag151_1G_P1_1T	13734.9	6	P0ABK7_22frag151_1G|CSGB_ECOLI|Minor curlin subunit_P1
CSGB_ECOLI	full	1	151	15936.2	0	Unmodified	P0ABK7_1full151_1G_P1_1T	15936.2	8	P0ABK7_1full151_1G|CSGB_ECOLI|Minor curlin subunit_P1
CSGC_ECOLI	signal-peptide	1	8	887.515	0	Unmodified	P52107_1frag8_1G_P1_1T	887.515	0	P52107_1frag8_1G|CSGC_ECOLI|Curli assembly protein CsgC_P1
CSGC_ECOLI	chain	9	110	11243.9	0	Unmodified	P52107_9frag110_1G_P1_1T	11243.9	5	P52107_9frag110_1G|CSGC_ECOLI|Curli assembly protein CsgC_P1
CSGC_ECOLI	full	1	110	12113.4	0	Unmodified	P52107_1full110_1G_P1_1T	12113.4	5	P52107_1full110_1G|CSGC_ECOLI|Curli assembly protein CsgC_P1
CSGD_ECOLI	full	1	216	25089.2	0	Unmodified	P52106_1full216_1G_P1_1T	25089.2	14	P52106_1full216_1G|CSGD_ECOLI|CsgBAC operon transcriptional regulatory protein_P1
CSGE_ECOLI	signal-peptide	1	22	2584.4	0	Unmodified	P0AE95_1frag22_1G_P1_1T	2584.4	1	P0AE95_1frag22_1G|CSGE_ECOLI|Curli production assembly/transport component CsgE_P1
CSGE_ECOLI	chain	23	129	12335.3	0	Unmodified	P0AE95_23frag129_1G_P1_1T	12335.3	3	P0AE95_23frag129_1G|CSGE_ECOLI|Curli production assembly/transport component CsgE_P1
CSGE_ECOLI	full	1	129	14901.7	0	Unmodified	P0AE95_1full129_1G_P1_1T	14901.7	4	P0AE95_1full129_1G|CSGE_ECOLI|Curli production assembly/transport component CsgE_P1
CSGF_ECOLI	signal-peptide	1	19	2171.26	0	Unmodified	P0AE98_1frag19_1G_P1_1T	2171.26	1	P0AE98_1frag19_1G|CSGF_ECOLI|Curli production assembly/transport component CsgF_P1
CSGF_ECOLI	chain	20	138	12925.3	0	Unmodified	P0AE98_20frag138_1G_P1_1T	12925.3	3	P0AE98_20frag138_1G|CSGF_ECOLI|Curli production assembly/transport component CsgF_P1
CSGF_ECOLI	full	1	138	15078.5	0	Unmodified	P0AE98_1full138_1G_P1_1T	15078.5	4	P0AE98_1full138_1G|CSGF_ECOLI|Curli production assembly/transport component CsgF_P1
CSGG_ECOLI	signal-peptide	1	15	1689.97	0	Unmodified	P0AEA2_1frag15_1G_P1_1T	1689.97	0	P0AEA2_1frag15_1G|CSGG_ECOLI|Curli production assembly/transport component CsgG_P1
CSGG_ECOLI	chain	16	277	29060.1	0	Unmodified	P0AEA2_16frag277_1G_P1_1T	29060.1	10	P0AEA2_16frag277_1G|CSGG_ECOLI|Curli production assembly/transport component CsgG_P1
CSGG_ECOLI	full	1	277	30732.1	0	Unmodified	P0AEA2_1full277_1G_P1_1T	30732.1	10	P0AEA2_1full277_1G|CSGG_ECOLI|Curli production assembly/transport component CsgG_P1
CSID_ECOLI	full	1	325	37498.1	0	Unmodified	P76621_1full325_1G_P1_1T	37498.1	13	P76621_1full325_1G|CSID_ECOLI|Protein CsiD_P1
CSIE_ECOLI	full	1	426	49529.7	0	Unmodified	P54901_1full426_1G_P1_1T	49529.7	8	P54901_1full426_1G|CSIE_ECOLI|Stationary phase-inducible protein CsiE_P1
CSIR_ECOLI	full	1	220	25145	0	Unmodified	P37338_1full220_1G_P1_1T	25145	7	P37338_1full220_1G|CSIR_ECOLI|HTH-type transcriptional repressor CsiR_P1
CSPA_ECOLI	chain	2	70	7323.69	0	Unmodified	P0A9X9_2frag70_1G_P1_1T	7323.69	7	P0A9X9_2frag70_1G|CSPA_ECOLI|Cold shock protein CspA_P1
CSPA_ECOLI	full	1	70	7454.73	0	Unmodified	P0A9X9_1full70_1G_P1_1T	7454.73	7	P0A9X9_1full70_1G|CSPA_ECOLI|Cold shock protein CspA_P1
CSPB_ECOLI	full	1	71	7759.94	0	Unmodified	P36995_1full71_1G_P1_1T	7759.94	6	P36995_1full71_1G|CSPB_ECOLI|Cold shock-like protein CspB_P1
CSPC_ECOLI	chain	2	69	7322.82	0	Unmodified	P0A9Y6_2frag69_1G_P1_1T	7322.82	7	P0A9Y6_2frag69_1G|CSPC_ECOLI|Cold shock-like protein CspC_P1
CSPC_ECOLI	full	1	69	7453.86	0	Unmodified	P0A9Y6_1full69_1G_P1_1T	7453.86	7	P0A9Y6_1full69_1G|CSPC_ECOLI|Cold shock-like protein CspC_P1
CSPD_ECOLI	full	1	74	8060.99	0	Unmodified	P0A968_1full74_1G_P1_1T	8060.99	5	P0A968_1full74_1G|CSPD_ECOLI|Cold shock-like protein CspD_P1
CSPE_ECOLI	chain	2	69	7383.87	0	Unmodified	P0A972_2frag69_1G_P1_1T	7383.87	7	P0A972_2frag69_1G|CSPE_ECOLI|Cold shock-like protein CspE_P1
CSPE_ECOLI	full	1	69	7514.91	0	Unmodified	P0A972_1full69_1G_P1_1T	7514.91	7	P0A972_1full69_1G|CSPE_ECOLI|Cold shock-like protein CspE_P1
CSPF_ECOLI	full	1	70	7647.05	0	Unmodified	P0A976_1full70_1G_P1_1T	7647.05	4	P0A976_1full70_1G|CSPF_ECOLI|Cold shock-like protein CspF_P1
CSPG_ECOLI	full	1	70	7815.93	0	Unmodified	P0A978_1full70_1G_P1_1T	7815.93	5	P0A978_1full70_1G|CSPG_ECOLI|Cold shock-like protein CspG_P1
CSPH_ECOLI	full	1	70	7812.22	0	Unmodified	P0A982_1full70_1G_P1_1T	7812.22	5	P0A982_1full70_1G|CSPH_ECOLI|Cold shock-like protein CspH_P1
CSPI_ECOLI	full	1	70	7734.97	0	Unmodified	P0A986_1full70_1G_P1_1T	7734.97	7	P0A986_1full70_1G|CSPI_ECOLI|Cold shock-like protein CspI_P1
CSRA_ECOLI	full	1	61	6875.7	0	Unmodified	P69913_1full61_1G_P1_1T	6875.7	3	P69913_1full61_1G|CSRA_ECOLI|Carbon storage regulator_P1
CSRD_ECOLI	full	1	646	73722.4	0	Unmodified	P13518_1full646_1G_P1_1T	73722.4	18	P13518_1full646_1G|CSRD_ECOLI|RNase E specificity factor CsrD_P1
CSTA_ECOLI	full	1	701	75680	0	Unmodified	P15078_1full701_1G_P1_1T	75680	21	P15078_1full701_1G|CSTA_ECOLI|Carbon starvation protein A_P1
CUEO_ECOLI	signal-peptide	1	28	3159.73	0	Unmodified	P36649_1frag28_1G_P1_1T	3159.73	1	P36649_1frag28_1G|CUEO_ECOLI|Blue copper oxidase CueO_P1
CUEO_ECOLI	chain	29	516	53741.1	0	Unmodified	P36649_29frag516_1G_P1_1T	53741.1	23	P36649_29frag516_1G|CUEO_ECOLI|Blue copper oxidase CueO_P1
CUEO_ECOLI	full	1	516	56882.8	0	Unmodified	P36649_1full516_1G_P1_1T	56882.8	24	P36649_1full516_1G|CUEO_ECOLI|Blue copper oxidase CueO_P1
CUER_ECOLI	full	1	135	15493.8	0	Unmodified	P0A9G4_1full135_1G_P1_1T	15493.8	5	P0A9G4_1full135_1G|CUER_ECOLI|HTH-type transcriptional regulator CueR_P1
CURA_ECOLI	full	1	345	37999.3	0	Unmodified	P76113_1full345_1G_P1_1T	37999.3	16	P76113_1full345_1G|CURA_ECOLI|NADPH-dependent curcumin reductase_P1
CUSA_ECOLI	full	1	1047	115093	0	Unmodified	P38054_1full1047_1G_P1_1T	115093	43	P38054_1full1047_1G|CUSA_ECOLI|Cation efflux system protein CusA_P1
CUSB_ECOLI	signal-peptide	1	28	2841.64	0	Unmodified	P77239_1frag28_1G_P1_1T	2841.64	3	P77239_1frag28_1G|CUSB_ECOLI|Cation efflux system protein CusB_P1
CUSB_ECOLI	chain	29	407	41629.9	0	Unmodified	P77239_29frag407_1G_P1_1T	41629.9	19	P77239_29frag407_1G|CUSB_ECOLI|Cation efflux system protein CusB_P1
CUSB_ECOLI	full	1	407	44453.5	0	Unmodified	P77239_1full407_1G_P1_1T	44453.5	22	P77239_1full407_1G|CUSB_ECOLI|Cation efflux system protein CusB_P1
CUSC_ECOLI	signal-peptide	1	17	1884.98	0	Unmodified	P77211_1frag17_1G_P1_1T	1884.98	1	P77211_1frag17_1G|CUSC_ECOLI|Cation efflux system protein CusC_P1
CUSC_ECOLI	chain	18	457	48638.9	0	Unmodified	P77211_18frag457_1G_P1_1T	48638.9	11	P77211_18frag457_1G|CUSC_ECOLI|Cation efflux system protein CusC_P1
CUSC_ECOLI	full	1	457	50505.9	0	Unmodified	P77211_1full457_1G_P1_1T	50505.9	12	P77211_1full457_1G|CUSC_ECOLI|Cation efflux system protein CusC_P1
CUSF_ECOLI	signal-peptide	1	21	2359.28	0	Unmodified	P77214_1frag21_1G_P1_1T	2359.28	2	P77214_1frag21_1G|CUSF_ECOLI|Cation efflux system protein CusF_P1
CUSF_ECOLI	chain	22	110	9974.14	0	Unmodified	P77214_22frag110_1G_P1_1T	9974.14	7	P77214_22frag110_1G|CUSF_ECOLI|Cation efflux system protein CusF_P1
CUSF_ECOLI	full	1	110	12315.4	0	Unmodified	P77214_1full110_1G_P1_1T	12315.4	9	P77214_1full110_1G|CUSF_ECOLI|Cation efflux system protein CusF_P1
CUSR_ECOLI	full	1	227	25474.6	0	Unmodified	P0ACZ8_1full227_1G_P1_1T	25474.6	12	P0ACZ8_1full227_1G|CUSR_ECOLI|Transcriptional regulatory protein CusR_P1
CUSS_ECOLI	full	1	480	53962.3	0	Unmodified	P77485_1full480_1G_P1_1T	53962.3	18	P77485_1full480_1G|CUSS_ECOLI|Sensor kinase CusS_P1
CUTA_ECOLI	full	1	112	12542.4	0	Unmodified	P69488_1full112_1G_P1_1T	12542.4	6	P69488_1full112_1G|CUTA_ECOLI|Divalent-cation tolerance protein CutA_P1
CUTC_ECOLI	full	1	248	27142.6	0	Unmodified	P67826_1full248_1G_P1_1T	27142.6	7	P67826_1full248_1G|CUTC_ECOLI|Copper homeostasis protein CutC_P1
CVPA_ECOLI	full	1	162	18090.6	0	Unmodified	P08550_1full162_1G_P1_1T	18090.6	3	P08550_1full162_1G|CVPA_ECOLI|Colicin V production protein_P1
CYAA_ECOLI	full	1	848	98611.9	0	Unmodified	P00936_1full848_1G_P1_1T	98611.9	29	P00936_1full848_1G|CYAA_ECOLI|Adenylate cyclase_P1
CYAY_ECOLI	full	1	106	12361.9	0	Unmodified	P27838_1full106_1G_P1_1T	12361.9	3	P27838_1full106_1G|CYAY_ECOLI|Protein CyaY_P1
CYBH_ECOLI	full	1	235	27692	0	Unmodified	P0AAM1_1full235_1G_P1_1T	27692	7	P0AAM1_1full235_1G|CYBH_ECOLI|Probable Ni/Fe-hydrogenase 1 B-type cytochrome subunit_P1
CYCA_ECOLI	full	1	470	52127.7	0	Unmodified	P0AAE0_1full470_1G_P1_1T	52127.7	20	P0AAE0_1full470_1G|CYCA_ECOLI|D-serine/D-alanine/glycine transporter_P1
CYDA_ECOLI	full	1	522	58506.4	0	Unmodified	P0ABJ9_1full522_1G_P1_1T	58506.4	21	P0ABJ9_1full522_1G|CYDA_ECOLI|Cytochrome bd-I ubiquinol oxidase subunit 1_P1
CYDB_ECOLI	full	1	379	42644.1	0	Unmodified	P0ABK2_1full379_1G_P1_1T	42644.1	6	P0ABK2_1full379_1G|CYDB_ECOLI|Cytochrome bd-I ubiquinol oxidase subunit 2_P1
CYDC_ECOLI	full	1	573	63074.9	0	Unmodified	P23886_1full573_1G_P1_1T	63074.9	10	P23886_1full573_1G|CYDC_ECOLI|ATP-binding/permease protein CydC_P1
CYDD_ECOLI	full	1	588	65144.4	0	Unmodified	P29018_1full588_1G_P1_1T	65144.4	9	P29018_1full588_1G|CYDD_ECOLI|ATP-binding/permease protein CydD_P1
CYDX_ECOLI	full	1	37	4104.06	0	Unmodified	P56100_1full37_1G_P1_1T	4104.06	1	P56100_1full37_1G|CYDX_ECOLI|Cytochrome bd-I ubiquinol oxidase subunit X_P1
CYNR_ECOLI	full	1	299	33175.5	0	Unmodified	P27111_1full299_1G_P1_1T	33175.5	8	P27111_1full299_1G|CYNR_ECOLI|HTH-type transcriptional regulator CynR_P1
CYNS_ECOLI	full	1	156	17183.3	0	Unmodified	P00816_1full156_1G_P1_1T	17183.3	11	P00816_1full156_1G|CYNS_ECOLI|Cyanate hydratase_P1
CYNT_ECOLI	full	1	219	24131.3	0	Unmodified	P0ABE9_1full219_1G_P1_1T	24131.3	5	P0ABE9_1full219_1G|CYNT_ECOLI|Carbonic anhydrase 1_P1
CYNX_ECOLI	full	1	384	41601.5	0	Unmodified	P17583_1full384_1G_P1_1T	41601.5	5	P17583_1full384_1G|CYNX_ECOLI|Cyanate transport protein CynX_P1
CYOA_ECOLI	signal-peptide	1	24	2725.54	0	Unmodified	P0ABJ1_1frag24_1G_P1_1T	2725.54	2	P0ABJ1_1frag24_1G|CYOA_ECOLI|Cytochrome bo(3) ubiquinol oxidase subunit 2_P1
CYOA_ECOLI	chain	25	315	32398.3	0	Unmodified	P0ABJ1_25frag315_1G_P1_1T	32398.3	18	P0ABJ1_25frag315_1G|CYOA_ECOLI|Cytochrome bo(3) ubiquinol oxidase subunit 2_P1
CYOA_ECOLI	full	1	315	35105.9	0	Unmodified	P0ABJ1_1full315_1G_P1_1T	35105.9	20	P0ABJ1_1full315_1G|CYOA_ECOLI|Cytochrome bo(3) ubiquinol oxidase subunit 2_P1
CYOB_ECOLI	full	1	663	74706.7	0	Unmodified	P0ABI8_1full663_1G_P1_1T	74706.7	20	P0ABI8_1full663_1G|CYOB_ECOLI|Cytochrome bo(3) ubiquinol oxidase subunit 1_P1
CYOC_ECOLI	full	1	204	22810.6	0	Unmodified	P0ABJ3_1full204_1G_P1_1T	22810.6	4	P0ABJ3_1full204_1G|CYOC_ECOLI|Cytochrome bo(3) ubiquinol oxidase subunit 3_P1
CYOD_ECOLI	full	1	109	12094.1	0	Unmodified	P0ABJ6_1full109_1G_P1_1T	12094.1	2	P0ABJ6_1full109_1G|CYOD_ECOLI|Cytochrome bo(3) ubiquinol oxidase subunit 4_P1
CYOE_ECOLI	full	1	296	32502.4	0	Unmodified	P0AEA5_1full296_1G_P1_1T	32502.4	13	P0AEA5_1full296_1G|CYOE_ECOLI|Protoheme IX farnesyltransferase_P1
CYSA_ECOLI	full	1	365	41121.7	0	Unmodified	P16676_1full365_1G_P1_1T	41121.7	11	P16676_1full365_1G|CYSA_ECOLI|Sulfate/thiosulfate import ATP-binding protein CysA_P1
CYSB_ECOLI	full	1	324	36305.1	0	Unmodified	P0A9F3_1full324_1G_P1_1T	36305.1	15	P0A9F3_1full324_1G|CYSB_ECOLI|HTH-type transcriptional regulator CysB_P1
CYSC_ECOLI	chain	2	201	22338.6	0	Unmodified	P0A6J1_2frag201_1G_P1_1T	22338.6	6	P0A6J1_2frag201_1G|CYSC_ECOLI|Adenylyl-sulfate kinase_P1
CYSC_ECOLI	full	1	201	22469.7	0	Unmodified	P0A6J1_1full201_1G_P1_1T	22469.7	6	P0A6J1_1full201_1G|CYSC_ECOLI|Adenylyl-sulfate kinase_P1
CYSD_ECOLI	full	1	302	35416.2	0	Unmodified	P21156_1full302_1G_P1_1T	35416.2	17	P21156_1full302_1G|CYSD_ECOLI|Sulfate adenylyltransferase subunit 2_P1
CYSE_ECOLI	full	1	273	29565.2	0	Unmodified	P0A9D4_1full273_1G_P1_1T	29565.2	12	P0A9D4_1full273_1G|CYSE_ECOLI|Serine acetyltransferase_P1
CYSG_ECOLI	full	1	457	50447.4	0	Unmodified	P0AEA8_1full457_1G_P1_1T	50447.4	16	P0AEA8_1full457_1G|CYSG_ECOLI|Siroheme synthase_P1
CYSH_ECOLI	chain	2	244	28004.7	0	Unmodified	P17854_2frag244_1G_P1_1T	28004.7	15	P17854_2frag244_1G|CYSH_ECOLI|Phosphoadenosine phosphosulfate reductase_P1
CYSH_ECOLI	full	1	244	28135.7	0	Unmodified	P17854_1full244_1G_P1_1T	28135.7	15	P17854_1full244_1G|CYSH_ECOLI|Phosphoadenosine phosphosulfate reductase_P1
CYSI_ECOLI	chain	2	570	64449.5	0	Unmodified	P17846_2frag570_1G_P1_1T	64449.5	35	P17846_2frag570_1G|CYSI_ECOLI|Sulfite reductase [NADPH] hemoprotein beta-component_P1
CYSI_ECOLI	full	1	570	64580.6	0	Unmodified	P17846_1full570_1G_P1_1T	64580.6	35	P17846_1full570_1G|CYSI_ECOLI|Sulfite reductase [NADPH] hemoprotein beta-component_P1
CYSJ_ECOLI	chain	2	599	66420.2	0	Unmodified	P38038_2frag599_1G_P1_1T	66420.2	26	P38038_2frag599_1G|CYSJ_ECOLI|Sulfite reductase [NADPH] flavoprotein alpha-component_P1
CYSJ_ECOLI	full	1	599	66551.3	0	Unmodified	P38038_1full599_1G_P1_1T	66551.3	26	P38038_1full599_1G|CYSJ_ECOLI|Sulfite reductase [NADPH] flavoprotein alpha-component_P1
CYSK_ECOLI	chain	2	323	34578.6	0	Unmodified	P0ABK5_2frag323_1G_P1_1T	34578.6	23	P0ABK5_2frag323_1G|CYSK_ECOLI|Cysteine synthase A_P1
CYSK_ECOLI	full	1	323	34709.6	0	Unmodified	P0ABK5_1full323_1G_P1_1T	34709.6	23	P0ABK5_1full323_1G|CYSK_ECOLI|Cysteine synthase A_P1
CYSM_ECOLI	full	1	303	32845.7	0	Unmodified	P16703_1full303_1G_P1_1T	32845.7	11	P16703_1full303_1G|CYSM_ECOLI|Cysteine synthase B_P1
CYSN_ECOLI	full	1	475	52752.3	0	Unmodified	P23845_1full475_1G_P1_1T	52752.3	14	P23845_1full475_1G|CYSN_ECOLI|Sulfate adenylyltransferase subunit 1_P1
CYSP_ECOLI	signal-peptide	1	25	2589.54	0	Unmodified	P16700_1frag25_1G_P1_1T	2589.54	2	P16700_1frag25_1G|CYSP_ECOLI|Thiosulfate-binding protein_P1
CYSP_ECOLI	chain	26	338	35244.2	0	Unmodified	P16700_26frag338_1G_P1_1T	35244.2	26	P16700_26frag338_1G|CYSP_ECOLI|Thiosulfate-binding protein_P1
CYSP_ECOLI	full	1	338	37815.7	0	Unmodified	P16700_1full338_1G_P1_1T	37815.7	28	P16700_1full338_1G|CYSP_ECOLI|Thiosulfate-binding protein_P1
CYSQ_ECOLI	full	1	246	27417.9	0	Unmodified	P22255_1full246_1G_P1_1T	27417.9	11	P22255_1full246_1G|CYSQ_ECOLI|3'(2'),5'-bisphosphate nucleotidase CysQ_P1
CYST_ECOLI	full	1	277	30426.4	0	Unmodified	P16701_1full277_1G_P1_1T	30426.4	5	P16701_1full277_1G|CYST_ECOLI|Sulfate transport system permease protein CysT_P1
CYSW_ECOLI	full	1	291	32613.5	0	Unmodified	P0AEB0_1full291_1G_P1_1T	32613.5	5	P0AEB0_1full291_1G|CYSW_ECOLI|Sulfate transport system permease protein CysW_P1
CYSZ_ECOLI	full	1	253	29520.5	0	Unmodified	P0A6J3_1full253_1G_P1_1T	29520.5	8	P0A6J3_1full253_1G|CYSZ_ECOLI|Sulfate transporter CysZ_P1
CYTR_ECOLI	full	1	341	38371.7	0	Unmodified	P0ACN7_1full341_1G_P1_1T	38371.7	15	P0ACN7_1full341_1G|CYTR_ECOLI|HTH-type transcriptional repressor CytR_P1
DACA_ECOLI	signal-peptide	1	29	3187.69	0	Unmodified	P0AEB2_1frag29_1G_P1_1T	3187.69	1	P0AEB2_1frag29_1G|DACA_ECOLI|D-alanyl-D-alanine carboxypeptidase DacA_P1
DACA_ECOLI	chain	30	403	41568.4	0	Unmodified	P0AEB2_30frag403_1G_P1_1T	41568.4	25	P0AEB2_30frag403_1G|DACA_ECOLI|D-alanyl-D-alanine carboxypeptidase DacA_P1
DACA_ECOLI	full	1	403	44738.1	0	Unmodified	P0AEB2_1full403_1G_P1_1T	44738.1	26	P0AEB2_1full403_1G|DACA_ECOLI|D-alanyl-D-alanine carboxypeptidase DacA_P1
DACB_ECOLI	signal-peptide	1	20	2303.19	0	Unmodified	P24228_1frag20_1G_P1_1T	2303.19	0	P24228_1frag20_1G|DACB_ECOLI|D-alanyl-D-alanine carboxypeptidase DacB_P1
DACB_ECOLI	chain	21	477	49909.7	0	Unmodified	P24228_21frag477_1G_P1_1T	49909.7	18	P24228_21frag477_1G|DACB_ECOLI|D-alanyl-D-alanine carboxypeptidase DacB_P1
DACB_ECOLI	full	1	477	52194.9	0	Unmodified	P24228_1full477_1G_P1_1T	52194.9	18	P24228_1full477_1G|DACB_ECOLI|D-alanyl-D-alanine carboxypeptidase DacB_P1
DACC_ECOLI	signal-peptide	1	27	2850.48	0	Unmodified	P08506_1frag27_1G_P1_1T	2850.48	0	P08506_1frag27_1G|DACC_ECOLI|D-alanyl-D-alanine carboxypeptidase DacC_P1
DACC_ECOLI	chain	28	400	41014.3	0	Unmodified	P08506_28frag400_1G_P1_1T	41014.3	26	P08506_28frag400_1G|DACC_ECOLI|D-alanyl-D-alanine carboxypeptidase DacC_P1
DACC_ECOLI	full	1	400	43846.7	0	Unmodified	P08506_1full400_1G_P1_1T	43846.7	26	P08506_1full400_1G|DACC_ECOLI|D-alanyl-D-alanine carboxypeptidase DacC_P1
DACD_ECOLI	signal-peptide	1	21	2348.33	0	Unmodified	P33013_1frag21_1G_P1_1T	2348.33	1	P33013_1frag21_1G|DACD_ECOLI|D-alanyl-D-alanine carboxypeptidase DacD_P1
DACD_ECOLI	chain	22	388	41205.9	0	Unmodified	P33013_22frag388_1G_P1_1T	41205.9	19	P33013_22frag388_1G|DACD_ECOLI|D-alanyl-D-alanine carboxypeptidase DacD_P1
DACD_ECOLI	full	1	388	43536.2	0	Unmodified	P33013_1full388_1G_P1_1T	43536.2	20	P33013_1full388_1G|DACD_ECOLI|D-alanyl-D-alanine carboxypeptidase DacD_P1
DADA_ECOLI	full	1	432	48023.4	0	Unmodified	P0A6J5_1full432_1G_P1_1T	48023.4	13	P0A6J5_1full432_1G|DADA_ECOLI|D-amino acid dehydrogenase_P1
DAMX_ECOLI	full	1	428	46358.8	0	Unmodified	P11557_1full428_1G_P1_1T	46358.8	28	P11557_1full428_1G|DAMX_ECOLI|Cell division protein DamX_P1
DAPA_ECOLI	full	1	292	31639.4	0	Unmodified	P0A6L2_1full292_1G_P1_1T	31639.4	13	P0A6L2_1full292_1G|DAPA_ECOLI|4-hydroxy-tetrahydrodipicolinate synthase_P1
DAPB_ECOLI	full	1	273	28948.8	0	Unmodified	P04036_1full273_1G_P1_1T	28948.8	12	P04036_1full273_1G|DAPB_ECOLI|4-hydroxy-tetrahydrodipicolinate reductase_P1
DAPD_ECOLI	full	1	274	30148.7	0	Unmodified	P0A9D8_1full274_1G_P1_1T	30148.7	13	P0A9D8_1full274_1G|DAPD_ECOLI|2,3,4,5-tetrahydropyridine-2,6-dicarboxylate N-succinyltransferase_P1
DAPE_ECOLI	full	1	375	41592.1	0	Unmodified	P0AED7_1full375_1G_P1_1T	41592.1	8	P0AED7_1full375_1G|DAPE_ECOLI|Succinyl-diaminopimelate desuccinylase_P1
DAPF_ECOLI	full	1	274	30587.4	0	Unmodified	P0A6K1_1full274_1G_P1_1T	30587.4	7	P0A6K1_1full274_1G|DAPF_ECOLI|Diaminopimelate epimerase_P1
DAUA_ECOLI	full	1	559	59828.6	0	Unmodified	P0AFR2_1full559_1G_P1_1T	59828.6	12	P0AFR2_1full559_1G|DAUA_ECOLI|C4-dicarboxylic acid transporter DauA_P1
DBHA_ECOLI	full	1	90	9617.34	0	Unmodified	P0ACF0_1full90_1G_P1_1T	9617.34	11	P0ACF0_1full90_1G|DBHA_ECOLI|DNA-binding protein HU-alpha_P1
DBHB_ECOLI	full	1	90	9292.12	0	Unmodified	P0ACF4_1full90_1G_P1_1T	9292.12	9	P0ACF4_1full90_1G|DBHB_ECOLI|DNA-binding protein HU-beta_P1
DBPA_ECOLI	full	1	457	49838.3	0	Unmodified	P21693_1full457_1G_P1_1T	49838.3	21	P21693_1full457_1G|DBPA_ECOLI|ATP-dependent RNA helicase DbpA_P1
DCD_ECOLI	full	1	193	21390.1	0	Unmodified	P28248_1full193_1G_P1_1T	21390.1	5	P28248_1full193_1G|DCD_ECOLI|dCTP deaminase_P1
DCDA_ECOLI	full	1	420	46440.6	0	Unmodified	P00861_1full420_1G_P1_1T	46440.6	8	P00861_1full420_1G|DCDA_ECOLI|Diaminopimelate decarboxylase_P1
DCEA_ECOLI	full	1	466	53413.7	0	Unmodified	P69908_1full466_1G_P1_1T	53413.7	24	P69908_1full466_1G|DCEA_ECOLI|Glutamate decarboxylase alpha_P1
DCEB_ECOLI	full	1	466	53404.7	0	Unmodified	P69910_1full466_1G_P1_1T	53404.7	25	P69910_1full466_1G|DCEB_ECOLI|Glutamate decarboxylase beta_P1
DCLZ_ECOLI	full	1	713	81194	0	Unmodified	P52095_1full713_1G_P1_1T	81194	32	P52095_1full713_1G|DCLZ_ECOLI|Constitutive lysine decarboxylase_P1
DCM_ECOLI	full	1	472	53981.8	0	Unmodified	P0AED9_1full472_1G_P1_1T	53981.8	26	P0AED9_1full472_1G|DCM_ECOLI|DNA-cytosine methyltransferase_P1
DCOR_ECOLI	full	1	711	80282.6	0	Unmodified	P21169_1full711_1G_P1_1T	80282.6	29	P21169_1full711_1G|DCOR_ECOLI|Constitutive ornithine decarboxylase_P1
DCOS_ECOLI	full	1	732	83622	0	Unmodified	P24169_1full732_1G_P1_1T	83622	29	P24169_1full732_1G|DCOS_ECOLI|Inducible ornithine decarboxylase_P1
DCP_ECOLI	chain	2	681	77634.3	0	Unmodified	P24171_2frag681_1G_P1_1T	77634.3	23	P24171_2frag681_1G|DCP_ECOLI|Dipeptidyl carboxypeptidase_P1
DCP_ECOLI	full	1	681	77765.3	0	Unmodified	P24171_1full681_1G_P1_1T	77765.3	23	P24171_1full681_1G|DCP_ECOLI|Dipeptidyl carboxypeptidase_P1
DCRB_ECOLI	signal-peptide	1	19	2025.17	0	Unmodified	P0AEE1_1frag19_1G_P1_1T	2025.17	1	P0AEE1_1frag19_1G|DCRB_ECOLI|Protein DcrB_P1
DCRB_ECOLI	chain	20	185	17921.2	0	Unmodified	P0AEE1_20frag185_1G_P1_1T	17921.2	11	P0AEE1_20frag185_1G|DCRB_ECOLI|Protein DcrB_P1
DCRB_ECOLI	full	1	185	19928.3	0	Unmodified	P0AEE1_1full185_1G_P1_1T	19928.3	12	P0AEE1_1full185_1G|DCRB_ECOLI|Protein DcrB_P1
DCTA_ECOLI	full	1	428	45803.1	0	Unmodified	P0A830_1full428_1G_P1_1T	45803.1	21	P0A830_1full428_1G|DCTA_ECOLI|Aerobic C4-dicarboxylate transport protein_P1
DCTR_ECOLI	full	1	176	20711	0	Unmodified	P37195_1full176_1G_P1_1T	20711	11	P37195_1full176_1G|DCTR_ECOLI|HTH-type transcriptional regulator DctR_P1
DCUA_ECOLI	full	1	433	46134.2	0	Unmodified	P0ABN5_1full433_1G_P1_1T	46134.2	16	P0ABN5_1full433_1G|DCUA_ECOLI|Anaerobic C4-dicarboxylate transporter DcuA_P1
DCUB_ECOLI	full	1	446	48317.2	0	Unmodified	P0ABN9_1full446_1G_P1_1T	48317.2	16	P0ABN9_1full446_1G|DCUB_ECOLI|Anaerobic C4-dicarboxylate transporter DcuB_P1
DCUC_ECOLI	full	1	461	48720.3	0	Unmodified	P0ABP3_1full461_1G_P1_1T	48720.3	14	P0ABP3_1full461_1G|DCUC_ECOLI|Anaerobic C4-dicarboxylate transporter DcuC_P1
DCUD_ECOLI	full	1	455	49065.3	0	Unmodified	P45428_1full455_1G_P1_1T	49065.3	12	P45428_1full455_1G|DCUD_ECOLI|Putative cryptic C4-dicarboxylate transporter DcuD_P1
DCUP_ECOLI	full	1	354	39571.2	0	Unmodified	P29680_1full354_1G_P1_1T	39571.2	15	P29680_1full354_1G|DCUP_ECOLI|Uroporphyrinogen decarboxylase_P1
DCUR_ECOLI	full	1	239	27966.2	0	Unmodified	P0AD01_1full239_1G_P1_1T	27966.2	12	P0AD01_1full239_1G|DCUR_ECOLI|Transcriptional regulatory protein DcuR_P1
DCUS_ECOLI	full	1	543	60859.6	0	Unmodified	P0AEC8_1full543_1G_P1_1T	60859.6	29	P0AEC8_1full543_1G|DCUS_ECOLI|Sensor histidine kinase DcuS_P1
DCYD_ECOLI	chain	2	328	35251.4	0	Unmodified	P76316_2frag328_1G_P1_1T	35251.4	10	P76316_2frag328_1G|DCYD_ECOLI|D-cysteine desulfhydrase_P1
DCYD_ECOLI	full	1	328	35382.4	0	Unmodified	P76316_1full328_1G_P1_1T	35382.4	10	P76316_1full328_1G|DCYD_ECOLI|D-cysteine desulfhydrase_P1
DDLA_ECOLI	full	1	364	39663.6	0	Unmodified	P0A6J8_1full364_1G_P1_1T	39663.6	18	P0A6J8_1full364_1G|DDLA_ECOLI|D-alanine--D-alanine ligase A_P1
DDLB_ECOLI	chain	2	306	32914	0	Unmodified	P07862_2frag306_1G_P1_1T	32914	14	P07862_2frag306_1G|DDLB_ECOLI|D-alanine--D-alanine ligase B_P1
DDLB_ECOLI	full	1	306	33045	0	Unmodified	P07862_1full306_1G_P1_1T	33045	14	P07862_1full306_1G|DDLB_ECOLI|D-alanine--D-alanine ligase B_P1
DDPA_ECOLI	signal-peptide	1	25	2760.57	0	Unmodified	P76128_1frag25_1G_P1_1T	2760.57	1	P76128_1frag25_1G|DDPA_ECOLI|Probable D,D-dipeptide-binding periplasmic protein DdpA_P1
DDPA_ECOLI	chain	26	516	55183.2	0	Unmodified	P76128_26frag516_1G_P1_1T	55183.2	39	P76128_26frag516_1G|DDPA_ECOLI|Probable D,D-dipeptide-binding periplasmic protein DdpA_P1
DDPA_ECOLI	full	1	516	57925.8	0	Unmodified	P76128_1full516_1G_P1_1T	57925.8	40	P76128_1full516_1G|DDPA_ECOLI|Probable D,D-dipeptide-binding periplasmic protein DdpA_P1
DDPB_ECOLI	full	1	340	37492.2	0	Unmodified	P77308_1full340_1G_P1_1T	37492.2	0	P77308_1full340_1G|DDPB_ECOLI|Probable D,D-dipeptide transport system permease protein DdpB_P1
DDPC_ECOLI	full	1	298	32112.2	0	Unmodified	P77463_1full298_1G_P1_1T	32112.2	6	P77463_1full298_1G|DDPC_ECOLI|Probable D,D-dipeptide transport system permease protein DdpC_P1
DDPD_ECOLI	full	1	328	36686.7	0	Unmodified	P77268_1full328_1G_P1_1T	36686.7	5	P77268_1full328_1G|DDPD_ECOLI|Probable D,D-dipeptide transport ATP-binding protein DdpD_P1
DDPF_ECOLI	full	1	308	34932.4	0	Unmodified	P77622_1full308_1G_P1_1T	34932.4	6	P77622_1full308_1G|DDPF_ECOLI|Probable D,D-dipeptide transport ATP-binding protein DdpF_P1
DDPX_ECOLI	full	1	193	21459.6	0	Unmodified	P77790_1full193_1G_P1_1T	21459.6	4	P77790_1full193_1G|DDPX_ECOLI|D-alanyl-D-alanine dipeptidase_P1
DEAD_ECOLI	chain	2	629	70596.9	0	Unmodified	P0A9P6_2frag629_1G_P1_1T	70596.9	21	P0A9P6_2frag629_1G|DEAD_ECOLI|ATP-dependent RNA helicase DeaD_P1
DEAD_ECOLI	full	1	629	70728	0	Unmodified	P0A9P6_1full629_1G_P1_1T	70728	21	P0A9P6_1full629_1G|DEAD_ECOLI|ATP-dependent RNA helicase DeaD_P1
DECR_ECOLI	full	1	152	17677.2	0	Unmodified	P0ACJ5_1full152_1G_P1_1T	17677.2	10	P0ACJ5_1full152_1G|DECR_ECOLI|DNA-binding transcriptional activator DecR_P1
DEDA_ECOLI	full	1	219	24615.4	0	Unmodified	P0ABP6_1full219_1G_P1_1T	24615.4	8	P0ABP6_1full219_1G|DEDA_ECOLI|Protein DedA_P1
DEDD_ECOLI	full	1	220	23084.5	0	Unmodified	P09549_1full220_1G_P1_1T	23084.5	20	P09549_1full220_1G|DEDD_ECOLI|Cell division protein DedD_P1
DEF_ECOLI	chain	2	169	19387.4	0	Unmodified	P0A6K3_2frag169_1G_P1_1T	19387.4	11	P0A6K3_2frag169_1G|DEF_ECOLI|Peptide deformylase_P1
DEF_ECOLI	full	1	169	19518.5	0	Unmodified	P0A6K3_1full169_1G_P1_1T	19518.5	11	P0A6K3_1full169_1G|DEF_ECOLI|Peptide deformylase_P1
DEGP_ECOLI	signal-peptide	1	26	2557.51	0	Unmodified	P0C0V0_1frag26_1G_P1_1T	2557.51	2	P0C0V0_1frag26_1G|DEGP_ECOLI|Periplasmic serine endoprotease DegP_P1
DEGP_ECOLI	chain	27	474	47122.4	0	Unmodified	P0C0V0_27frag474_1G_P1_1T	47122.4	26	P0C0V0_27frag474_1G|DEGP_ECOLI|Periplasmic serine endoprotease DegP_P1
DEGP_ECOLI	full	1	474	49661.9	0	Unmodified	P0C0V0_1full474_1G_P1_1T	49661.9	28	P0C0V0_1full474_1G|DEGP_ECOLI|Periplasmic serine endoprotease DegP_P1
DEGQ_ECOLI	signal-peptide	1	27	2791.59	0	Unmodified	P39099_1frag27_1G_P1_1T	2791.59	2	P39099_1frag27_1G|DEGQ_ECOLI|Periplasmic pH-dependent serine endoprotease DegQ_P1
DEGQ_ECOLI	chain	28	455	44619	0	Unmodified	P39099_28frag455_1G_P1_1T	44619	25	P39099_28frag455_1G|DEGQ_ECOLI|Periplasmic pH-dependent serine endoprotease DegQ_P1
DEGQ_ECOLI	full	1	455	47392.5	0	Unmodified	P39099_1full455_1G_P1_1T	47392.5	27	P39099_1full455_1G|DEGQ_ECOLI|Periplasmic pH-dependent serine endoprotease DegQ_P1
DEGS_ECOLI	full	1	355	37622	0	Unmodified	P0AEE3_1full355_1G_P1_1T	37622	8	P0AEE3_1full355_1G|DEGS_ECOLI|Serine endoprotease DegS_P1
DEOB_ECOLI	full	1	407	44860.4	0	Unmodified	P0A6K6_1full407_1G_P1_1T	44860.4	22	P0A6K6_1full407_1G|DEOB_ECOLI|Phosphopentomutase_P1
DEOC_ECOLI	full	1	259	28096.7	0	Unmodified	P0A6L0_1full259_1G_P1_1T	28096.7	19	P0A6L0_1full259_1G|DEOC_ECOLI|Deoxyribose-phosphate aldolase_P1
DEOD_ECOLI	chain	2	239	26142.3	0	Unmodified	P0ABP8_2frag239_1G_P1_1T	26142.3	14	P0ABP8_2frag239_1G|DEOD_ECOLI|Purine nucleoside phosphorylase DeoD-type_P1
DEOD_ECOLI	full	1	239	26273.3	0	Unmodified	P0ABP8_1full239_1G_P1_1T	26273.3	14	P0ABP8_1full239_1G|DEOD_ECOLI|Purine nucleoside phosphorylase DeoD-type_P1
DEOR_ECOLI	full	1	252	29122	0	Unmodified	P0ACK5_1full252_1G_P1_1T	29122	17	P0ACK5_1full252_1G|DEOR_ECOLI|Deoxyribose operon repressor_P1
DER_ECOLI	full	1	490	55274.9	0	Unmodified	P0A6P5_1full490_1G_P1_1T	55274.9	27	P0A6P5_1full490_1G|DER_ECOLI|GTPase Der_P1
DGAL_ECOLI	signal-peptide	1	23	2377.27	0	Unmodified	P0AEE5_1frag23_1G_P1_1T	2377.27	2	P0AEE5_1frag23_1G|DGAL_ECOLI|D-galactose-binding periplasmic protein_P1
DGAL_ECOLI	chain	24	332	33595.6	0	Unmodified	P0AEE5_24frag332_1G_P1_1T	33595.6	31	P0AEE5_24frag332_1G|DGAL_ECOLI|D-galactose-binding periplasmic protein_P1
DGAL_ECOLI	full	1	332	35954.8	0	Unmodified	P0AEE5_1full332_1G_P1_1T	35954.8	33	P0AEE5_1full332_1G|DGAL_ECOLI|D-galactose-binding periplasmic protein_P1
DGOA_ECOLI	full	1	205	21661.2	0	Unmodified	Q6BF16_1full205_1G_P1_1T	21661.2	7	Q6BF16_1full205_1G|DGOA_ECOLI|2-dehydro-3-deoxy-6-phosphogalactonate aldolase_P1
DGOD_ECOLI	full	1	382	42892.2	0	Unmodified	Q6BF17_1full382_1G_P1_1T	42892.2	21	Q6BF17_1full382_1G|DGOD_ECOLI|D-galactonate dehydratase_P1
DGOK_ECOLI	full	1	292	31670.9	0	Unmodified	P31459_1full292_1G_P1_1T	31670.9	4	P31459_1full292_1G|DGOK_ECOLI|2-dehydro-3-deoxygalactonokinase_P1
DGOR_ECOLI	full	1	229	26176.4	0	Unmodified	P31460_1full229_1G_P1_1T	26176.4	7	P31460_1full229_1G|DGOR_ECOLI|Galactonate operon transcriptional repressor_P1
DGOT_ECOLI	full	1	430	47451.2	0	Unmodified	P0AA76_1full430_1G_P1_1T	47451.2	15	P0AA76_1full430_1G|DGOT_ECOLI|D-galactonate transporter_P1
DGTP_ECOLI	chain	2	505	59740.9	0	Unmodified	P15723_2frag505_1G_P1_1T	59740.9	23	P15723_2frag505_1G|DGTP_ECOLI|Deoxyguanosinetriphosphate triphosphohydrolase_P1
DGTP_ECOLI	full	1	505	59871.9	0	Unmodified	P15723_1full505_1G_P1_1T	59871.9	23	P15723_1full505_1G|DGTP_ECOLI|Deoxyguanosinetriphosphate triphosphohydrolase_P1
DHAK_ECOLI	full	1	356	38702.5	0	Unmodified	P76015_1full356_1G_P1_1T	38702.5	14	P76015_1full356_1G|DHAK_ECOLI|PEP-dependent dihydroxyacetone kinase, dihydroxyacetone-binding subunit DhaK_P1
DHAL_ECOLI	full	1	210	22795.5	0	Unmodified	P76014_1full210_1G_P1_1T	22795.5	8	P76014_1full210_1G|DHAL_ECOLI|PEP-dependent dihydroxyacetone kinase, ADP-binding subunit DhaL_P1
DHAM_ECOLI	full	1	472	52008.7	0	Unmodified	P37349_1full472_1G_P1_1T	52008.7	17	P37349_1full472_1G|DHAM_ECOLI|Protein-lysine deacetylase_P1
DHAR_ECOLI	full	1	639	71264.1	0	Unmodified	P76016_1full639_1G_P1_1T	71264.1	22	P76016_1full639_1G|DHAR_ECOLI|PTS-dependent dihydroxyacetone kinase operon regulatory protein_P1
DHAS_ECOLI	full	1	367	40324.8	0	Unmodified	P0A9Q9_1full367_1G_P1_1T	40324.8	13	P0A9Q9_1full367_1G|DHAS_ECOLI|Aspartate-semialdehyde dehydrogenase_P1
DHE4_ECOLI	full	1	447	48954.8	0	Unmodified	P00370_1full447_1G_P1_1T	48954.8	22	P00370_1full447_1G|DHE4_ECOLI|NADP-specific glutamate dehydrogenase_P1
DHG_ECOLI	full	1	796	87347.4	0	Unmodified	P15877_1full796_1G_P1_1T	87347.4	32	P15877_1full796_1G|DHG_ECOLI|Quinoprotein glucose dehydrogenase_P1
DHNA_ECOLI	chain	2	434	47626	0	Unmodified	P00393_2frag434_1G_P1_1T	47626	25	P00393_2frag434_1G|DHNA_ECOLI|NADH dehydrogenase_P1
DHNA_ECOLI	full	1	434	47757.1	0	Unmodified	P00393_1full434_1G_P1_1T	47757.1	25	P00393_1full434_1G|DHNA_ECOLI|NADH dehydrogenase_P1
DHPS_ECOLI	full	1	282	30870.9	0	Unmodified	P0AC13_1full282_1G_P1_1T	30870.9	13	P0AC13_1full282_1G|DHPS_ECOLI|Dihydropteroate synthase_P1
DHSC_ECOLI	full	1	129	14329.9	0	Unmodified	P69054_1full129_1G_P1_1T	14329.9	5	P69054_1full129_1G|DHSC_ECOLI|Succinate dehydrogenase cytochrome b556 subunit_P1
DHSD_ECOLI	full	1	115	12875.1	0	Unmodified	P0AC44_1full115_1G_P1_1T	12875.1	2	P0AC44_1full115_1G|DHSD_ECOLI|Succinate dehydrogenase hydrophobic membrane anchor subunit_P1
DIAA_ECOLI	full	1	196	21409.8	0	Unmodified	P66817_1full196_1G_P1_1T	21409.8	4	P66817_1full196_1G|DIAA_ECOLI|DnaA initiator-associating protein DiaA_P1
DICA_ECOLI	full	1	135	15815.6	0	Unmodified	P06966_1full135_1G_P1_1T	15815.6	14	P06966_1full135_1G|DICA_ECOLI|HTH-type transcriptional regulator DicA_P1
DICB_ECOLI	full	1	62	7170.79	0	Unmodified	P09557_1full62_1G_P1_1T	7170.79	5	P09557_1full62_1G|DICB_ECOLI|Division inhibition protein DicB_P1
DICC_ECOLI	full	1	76	8628.53	0	Unmodified	P06965_1full76_1G_P1_1T	8628.53	7	P06965_1full76_1G|DICC_ECOLI|Repressor protein of division inhibition gene dicB_P1
DIND_ECOLI	full	1	274	31365.4	0	Unmodified	P23840_1full274_1G_P1_1T	31365.4	24	P23840_1full274_1G|DIND_ECOLI|DNA damage-inducible protein D_P1
DINF_ECOLI	full	1	459	49939.4	0	Unmodified	P28303_1full459_1G_P1_1T	49939.4	5	P28303_1full459_1G|DINF_ECOLI|DNA damage-inducible protein F_P1
DING_ECOLI	full	1	716	82328.5	0	Unmodified	P27296_1full716_1G_P1_1T	82328.5	39	P27296_1full716_1G|DING_ECOLI|Probable ATP-dependent helicase DinG_P1
DINI_ECOLI	full	1	81	8967.56	0	Unmodified	P0ABR1_1full81_1G_P1_1T	8967.56	3	P0ABR1_1full81_1G|DINI_ECOLI|DNA damage-inducible protein I_P1
DINJ_ECOLI	full	1	86	9456.11	0	Unmodified	Q47150_1full86_1G_P1_1T	9456.11	7	Q47150_1full86_1G|DINJ_ECOLI|Antitoxin DinJ_P1
DINQ_ECOLI	full	1	27	3026.88	0	Unmodified	A5A624_1full27_1G_P1_1T	3026.88	1	A5A624_1full27_1G|DINQ_ECOLI|Uncharacterized protein DinQ_P1
DJLA_ECOLI	full	1	271	30809.8	0	Unmodified	P31680_1full271_1G_P1_1T	30809.8	17	P31680_1full271_1G|DJLA_ECOLI|Co-chaperone protein DjlA_P1
DJLB_ECOLI	full	1	475	55903.4	0	Unmodified	P77381_1full475_1G_P1_1T	55903.4	14	P77381_1full475_1G|DJLB_ECOLI|Uncharacterized J domain-containing protein DjlB_P1
DJLC_ECOLI	full	1	483	56426.2	0	Unmodified	P77359_1full483_1G_P1_1T	56426.2	19	P77359_1full483_1G|DJLC_ECOLI|Uncharacterized J domain-containing protein DjlC_P1
DKGA_ECOLI	full	1	275	31315.6	0	Unmodified	Q46857_1full275_1G_P1_1T	31315.6	21	Q46857_1full275_1G|DKGA_ECOLI|2,5-diketo-D-gluconic acid reductase A_P1
DKGB_ECOLI	full	1	267	29627.7	0	Unmodified	P30863_1full267_1G_P1_1T	29627.7	19	P30863_1full267_1G|DKGB_ECOLI|2,5-diketo-D-gluconic acid reductase B_P1
DKSA_ECOLI	full	1	151	17825	0	Unmodified	P0ABS1_1full151_1G_P1_1T	17825	10	P0ABS1_1full151_1G|DKSA_ECOLI|RNA polymerase-binding transcription factor DksA_P1
DLD_ECOLI	chain	2	571	65079.2	0	Unmodified	P06149_2frag571_1G_P1_1T	65079.2	37	P06149_2frag571_1G|DLD_ECOLI|D-lactate dehydrogenase_P1
DLD_ECOLI	full	1	571	65210.3	0	Unmodified	P06149_1full571_1G_P1_1T	65210.3	37	P06149_1full571_1G|DLD_ECOLI|D-lactate dehydrogenase_P1
DLDH_ECOLI	chain	2	474	51123.2	0	Unmodified	P0A9P0_2frag474_1G_P1_1T	51123.2	39	P0A9P0_2frag474_1G|DLDH_ECOLI|Dihydrolipoyl dehydrogenase_P1
DLDH_ECOLI	full	1	474	51254.3	0	Unmodified	P0A9P0_1full474_1G_P1_1T	51254.3	39	P0A9P0_1full474_1G|DLDH_ECOLI|Dihydrolipoyl dehydrogenase_P1
DLGD_ECOLI	full	1	332	36824.6	0	Unmodified	P37672_1full332_1G_P1_1T	36824.6	13	P37672_1full332_1G|DLGD_ECOLI|2,3-diketo-L-gulonate reductase_P1
DLHH_ECOLI	full	1	271	29601	0	Unmodified	P56262_1full271_1G_P1_1T	29601	10	P56262_1full271_1G|DLHH_ECOLI|Putative carboxymethylenebutenolidase_P1
DLST_ECOLI	full	1	443	48704.1	0	Unmodified	P42628_1full443_1G_P1_1T	48704.1	17	P42628_1full443_1G|DLST_ECOLI|Probable serine transporter_P1
DMA_ECOLI	full	1	278	32508.6	0	Unmodified	P0AEE8_1full278_1G_P1_1T	32508.6	18	P0AEE8_1full278_1G|DMA_ECOLI|DNA adenine methylase_P1
DMLA_ECOLI	full	1	361	40670.4	0	Unmodified	P76251_1full361_1G_P1_1T	40670.4	12	P76251_1full361_1G|DMLA_ECOLI|D-malate dehydrogenase [decarboxylating]_P1
DMLR_ECOLI	full	1	307	34844.4	0	Unmodified	P76250_1full307_1G_P1_1T	34844.4	8	P76250_1full307_1G|DMLR_ECOLI|HTH-type transcriptional regulator DmlR_P1
DMSA_ECOLI	signal-peptide	1	45	4643.62	0	Unmodified	P18775_1frag45_1G_P1_1T	4643.62	3	P18775_1frag45_1G|DMSA_ECOLI|Dimethyl sulfoxide reductase DmsA_P1
DMSA_ECOLI	chain	46	814	86923.4	0	Unmodified	P18775_46frag814_1G_P1_1T	86923.4	41	P18775_46frag814_1G|DMSA_ECOLI|Dimethyl sulfoxide reductase DmsA_P1
DMSA_ECOLI	full	1	814	91549.1	0	Unmodified	P18775_1full814_1G_P1_1T	91549.1	44	P18775_1full814_1G|DMSA_ECOLI|Dimethyl sulfoxide reductase DmsA_P1
DMSB_ECOLI	chain	2	205	23747.2	0	Unmodified	P18776_2frag205_1G_P1_1T	23747.2	14	P18776_2frag205_1G|DMSB_ECOLI|Anaerobic dimethyl sulfoxide reductase chain B_P1
DMSB_ECOLI	full	1	205	23878.2	0	Unmodified	P18776_1full205_1G_P1_1T	23878.2	14	P18776_1full205_1G|DMSB_ECOLI|Anaerobic dimethyl sulfoxide reductase chain B_P1
DMSC_ECOLI	full	1	287	31008.5	0	Unmodified	P18777_1full287_1G_P1_1T	31008.5	4	P18777_1full287_1G|DMSC_ECOLI|Anaerobic dimethyl sulfoxide reductase chain C_P1
DMSD_ECOLI	chain	2	204	23344.8	0	Unmodified	P69853_2frag204_1G_P1_1T	23344.8	4	P69853_2frag204_1G|DMSD_ECOLI|Tat proofreading chaperone DmsD_P1
DMSD_ECOLI	full	1	204	23475.8	0	Unmodified	P69853_1full204_1G_P1_1T	23475.8	4	P69853_1full204_1G|DMSD_ECOLI|Tat proofreading chaperone DmsD_P1
DNAA_ECOLI	full	1	467	52873.6	0	Unmodified	P03004_1full467_1G_P1_1T	52873.6	23	P03004_1full467_1G|DNAA_ECOLI|Chromosomal replication initiator protein DnaA_P1
DNAB_ECOLI	full	1	471	52502	0	Unmodified	P0ACB0_1full471_1G_P1_1T	52502	18	P0ACB0_1full471_1G|DNAB_ECOLI|Replicative DNA helicase_P1
DNAC_ECOLI	full	1	245	28216.4	0	Unmodified	P0AEF0_1full245_1G_P1_1T	28216.4	16	P0AEF0_1full245_1G|DNAC_ECOLI|DNA replication protein DnaC_P1
DNAG_ECOLI	full	1	581	66098.8	0	Unmodified	P0ABS5_1full581_1G_P1_1T	66098.8	22	P0ABS5_1full581_1G|DNAG_ECOLI|DNA primase_P1
DNAJ_ECOLI	chain	2	376	41722	0	Unmodified	P08622_2frag376_1G_P1_1T	41722	26	P08622_2frag376_1G|DNAJ_ECOLI|Chaperone protein DnaJ_P1
DNAJ_ECOLI	full	1	376	41853.1	0	Unmodified	P08622_1full376_1G_P1_1T	41853.1	26	P08622_1full376_1G|DNAJ_ECOLI|Chaperone protein DnaJ_P1
DNAK_ECOLI	chain	2	638	69399.2	0	Unmodified	P0A6Y8_2frag638_1G_P1_1T	69399.2	50	P0A6Y8_2frag638_1G|DNAK_ECOLI|Chaperone protein DnaK_P1
DNAK_ECOLI	full	1	638	69530.2	0	Unmodified	P0A6Y8_1full638_1G_P1_1T	69530.2	50	P0A6Y8_1full638_1G|DNAK_ECOLI|Chaperone protein DnaK_P1
DNAT_ECOLI	chain	2	179	19360.1	0	Unmodified	P0A8J2_2frag179_1G_P1_1T	19360.1	6	P0A8J2_2frag179_1G|DNAT_ECOLI|Primosomal protein 1_P1
DNAT_ECOLI	full	1	179	19491.1	0	Unmodified	P0A8J2_1full179_1G_P1_1T	19491.1	6	P0A8J2_1full179_1G|DNAT_ECOLI|Primosomal protein 1_P1
DNLJ_ECOLI	full	1	671	74272.9	0	Unmodified	P15042_1full671_1G_P1_1T	74272.9	32	P15042_1full671_1G|DNLJ_ECOLI|DNA ligase_P1
DOSC_ECOLI	full	1	460	53321	0	Unmodified	P0AA89_1full460_1G_P1_1T	53321	22	P0AA89_1full460_1G|DOSC_ECOLI|Diguanylate cyclase DosC_P1
DOSP_ECOLI	full	1	799	90915.8	0	Unmodified	P76129_1full799_1G_P1_1T	90915.8	32	P76129_1full799_1G|DOSP_ECOLI|Oxygen sensor protein DosP_P1
DPAL_ECOLI	full	1	398	43859.2	0	Unmodified	P66899_1full398_1G_P1_1T	43859.2	20	P66899_1full398_1G|DPAL_ECOLI|Diaminopropionate ammonia-lyase_P1
DPIA_ECOLI	full	1	226	25615.4	0	Unmodified	P0AEF4_1full226_1G_P1_1T	25615.4	8	P0AEF4_1full226_1G|DPIA_ECOLI|Transcriptional regulatory protein DpiA_P1
DPIB_ECOLI	full	1	552	62016.5	0	Unmodified	P77510_1full552_1G_P1_1T	62016.5	25	P77510_1full552_1G|DPIB_ECOLI|Sensor histidine kinase DpiB_P1
DPO1_ECOLI	full	1	928	103640	0	Unmodified	P00582_1full928_1G_P1_1T	103640	59	P00582_1full928_1G|DPO1_ECOLI|DNA polymerase I_P1
DPO2_ECOLI	chain	2	783	90504.3	0	Unmodified	P21189_2frag783_1G_P1_1T	90504.3	30	P21189_2frag783_1G|DPO2_ECOLI|DNA polymerase II_P1
DPO2_ECOLI	full	1	783	90635.4	0	Unmodified	P21189_1full783_1G_P1_1T	90635.4	30	P21189_1full783_1G|DPO2_ECOLI|DNA polymerase II_P1
DPO3A_ECOLI	full	1	1160	130971	0	Unmodified	P10443_1full1160_1G_P1_1T	130971	58	P10443_1full1160_1G|DPO3A_ECOLI|DNA polymerase III subunit alpha_P1
DPO3B_ECOLI	full	1	366	40885	0	Unmodified	P0A988_1full366_1G_P1_1T	40885	12	P0A988_1full366_1G|DPO3B_ECOLI|DNA polymerase III subunit beta_P1
DPO3E_ECOLI	full	1	243	27349	0	Unmodified	P03007_1full243_1G_P1_1T	27349	12	P03007_1full243_1G|DPO3E_ECOLI|DNA polymerase III subunit epsilon_P1
DPO3X_ECOLI	chain	2	643	71528.9	0	Unmodified	P06710_2frag643_1G_P1_1T	71528.9	28	P06710_2frag643_1G|DPO3X_ECOLI|DNA polymerase III subunit tau_P1
DPO3X_ECOLI	full	1	643	71659.9	0	Unmodified	P06710_1full643_1G_P1_1T	71659.9	28	P06710_1full643_1G|DPO3X_ECOLI|DNA polymerase III subunit tau_P1
DPO4_ECOLI	full	1	351	39993.2	0	Unmodified	Q47155_1full351_1G_P1_1T	39993.2	20	Q47155_1full351_1G|DPO4_ECOLI|DNA polymerase IV_P1
DPPA_ECOLI	signal-peptide	1	28	2926.7	0	Unmodified	P23847_1frag28_1G_P1_1T	2926.7	3	P23847_1frag28_1G|DPPA_ECOLI|Periplasmic dipeptide transport protein_P1
DPPA_ECOLI	chain	29	535	57943.3	0	Unmodified	P23847_29frag535_1G_P1_1T	57943.3	43	P23847_29frag535_1G|DPPA_ECOLI|Periplasmic dipeptide transport protein_P1
DPPA_ECOLI	full	1	535	60852	0	Unmodified	P23847_1full535_1G_P1_1T	60852	46	P23847_1full535_1G|DPPA_ECOLI|Periplasmic dipeptide transport protein_P1
DPPB_ECOLI	full	1	339	37577.3	0	Unmodified	P0AEF8_1full339_1G_P1_1T	37577.3	6	P0AEF8_1full339_1G|DPPB_ECOLI|Dipeptide transport system permease protein DppB_P1
DPPC_ECOLI	full	1	300	32441.4	0	Unmodified	P0AEG1_1full300_1G_P1_1T	32441.4	5	P0AEG1_1full300_1G|DPPC_ECOLI|Dipeptide transport system permease protein DppC_P1
DPPD_ECOLI	full	1	327	36267.8	0	Unmodified	P0AAG0_1full327_1G_P1_1T	36267.8	13	P0AAG0_1full327_1G|DPPD_ECOLI|Dipeptide transport ATP-binding protein DppD_P1
DPPF_ECOLI	full	1	334	38038.9	0	Unmodified	P37313_1full334_1G_P1_1T	38038.9	20	P37313_1full334_1G|DPPF_ECOLI|Dipeptide transport ATP-binding protein DppF_P1
DPS_ECOLI	chain	2	167	18648.9	0	Unmodified	P0ABT2_2frag167_1G_P1_1T	18648.9	12	P0ABT2_2frag167_1G|DPS_ECOLI|DNA protection during starvation protein_P1
DPS_ECOLI	full	1	167	18779.9	0	Unmodified	P0ABT2_1full167_1G_P1_1T	18779.9	12	P0ABT2_1full167_1G|DPS_ECOLI|DNA protection during starvation protein_P1
DSBA_ECOLI	signal-peptide	1	19	2005.18	0	Unmodified	P0AEG4_1frag19_1G_P1_1T	2005.18	2	P0AEG4_1frag19_1G|DSBA_ECOLI|Thiol:disulfide interchange protein DsbA_P1
DSBA_ECOLI	chain	20	208	21368.9	0	Unmodified	P0AEG4_20frag208_1G_P1_1T	21368.9	17	P0AEG4_20frag208_1G|DSBA_ECOLI|Thiol:disulfide interchange protein DsbA_P1
DSBA_ECOLI	full	1	208	23356	0	Unmodified	P0AEG4_1full208_1G_P1_1T	23356	19	P0AEG4_1full208_1G|DSBA_ECOLI|Thiol:disulfide interchange protein DsbA_P1
DSBB_ECOLI	full	1	176	20518.8	0	Unmodified	P0A6M2_1full176_1G_P1_1T	20518.8	6	P0A6M2_1full176_1G|DSBB_ECOLI|Disulfide bond formation protein B_P1
DSBC_ECOLI	signal-peptide	1	20	2194.17	0	Unmodified	P0AEG6_1frag20_1G_P1_1T	2194.17	2	P0AEG6_1frag20_1G|DSBC_ECOLI|Thiol:disulfide interchange protein DsbC_P1
DSBC_ECOLI	chain	21	236	23833.2	0	Unmodified	P0AEG6_21frag236_1G_P1_1T	23833.2	20	P0AEG6_21frag236_1G|DSBC_ECOLI|Thiol:disulfide interchange protein DsbC_P1
DSBC_ECOLI	full	1	236	26009.3	0	Unmodified	P0AEG6_1full236_1G_P1_1T	26009.3	22	P0AEG6_1full236_1G|DSBC_ECOLI|Thiol:disulfide interchange protein DsbC_P1
DSBD_ECOLI	signal-peptide	1	19	2183.18	0	Unmodified	P36655_1frag19_1G_P1_1T	2183.18	0	P36655_1frag19_1G|DSBD_ECOLI|Thiol:disulfide interchange protein DsbD_P1
DSBD_ECOLI	chain	20	565	60174.5	0	Unmodified	P36655_20frag565_1G_P1_1T	60174.5	16	P36655_20frag565_1G|DSBD_ECOLI|Thiol:disulfide interchange protein DsbD_P1
DSBD_ECOLI	full	1	565	62339.7	0	Unmodified	P36655_1full565_1G_P1_1T	62339.7	16	P36655_1full565_1G|DSBD_ECOLI|Thiol:disulfide interchange protein DsbD_P1
DSBE_ECOLI	full	1	185	20998.1	0	Unmodified	P0AA86_1full185_1G_P1_1T	20998.1	11	P0AA86_1full185_1G|DSBE_ECOLI|Thiol:disulfide interchange protein DsbE_P1
DSBG_ECOLI	signal-peptide	1	17	1854.21	0	Unmodified	P77202_1frag17_1G_P1_1T	1854.21	2	P77202_1frag17_1G|DSBG_ECOLI|Thiol:disulfide interchange protein DsbG_P1
DSBG_ECOLI	chain	18	248	25947.4	0	Unmodified	P77202_18frag248_1G_P1_1T	25947.4	22	P77202_18frag248_1G|DSBG_ECOLI|Thiol:disulfide interchange protein DsbG_P1
DSBG_ECOLI	full	1	248	27783.6	0	Unmodified	P77202_1full248_1G_P1_1T	27783.6	24	P77202_1full248_1G|DSBG_ECOLI|Thiol:disulfide interchange protein DsbG_P1
DSDC_ECOLI	full	1	311	35675.3	0	Unmodified	P46068_1full311_1G_P1_1T	35675.3	10	P46068_1full311_1G|DSDC_ECOLI|HTH-type transcriptional regulator DsdC_P1
DSDX_ECOLI	full	1	445	47594.1	0	Unmodified	P08555_1full445_1G_P1_1T	47594.1	15	P08555_1full445_1G|DSDX_ECOLI|DsdX permease_P1
DSRB_ECOLI	full	1	62	6965.49	0	Unmodified	P0AEG8_1full62_1G_P1_1T	6965.49	3	P0AEG8_1full62_1G|DSRB_ECOLI|Protein DsrB_P1
DTD_ECOLI	full	1	145	16086.1	0	Unmodified	P0A6M4_1full145_1G_P1_1T	16086.1	4	P0A6M4_1full145_1G|DTD_ECOLI|D-aminoacyl-tRNA deacylase_P1
DTPA_ECOLI	full	1	500	54286.7	0	Unmodified	P77304_1full500_1G_P1_1T	54286.7	20	P77304_1full500_1G|DTPA_ECOLI|Dipeptide and tripeptide permease A_P1
DTPB_ECOLI	full	1	489	53952.6	0	Unmodified	P36837_1full489_1G_P1_1T	53952.6	16	P36837_1full489_1G|DTPB_ECOLI|Dipeptide and tripeptide permease B_P1
DTPC_ECOLI	full	1	485	53482.9	0	Unmodified	P39276_1full485_1G_P1_1T	53482.9	8	P39276_1full485_1G|DTPC_ECOLI|Dipeptide and tripeptide permease C_P1
DTPD_ECOLI	full	1	493	54691.6	0	Unmodified	P75742_1full493_1G_P1_1T	54691.6	14	P75742_1full493_1G|DTPD_ECOLI|Dipeptide permease D_P1
DUSA_ECOLI	full	1	345	38962.5	0	Unmodified	P32695_1full345_1G_P1_1T	38962.5	15	P32695_1full345_1G|DUSA_ECOLI|tRNA-dihydrouridine(20/20a) synthase_P1
DUSB_ECOLI	full	1	321	36289.7	0	Unmodified	P0ABT5_1full321_1G_P1_1T	36289.7	13	P0ABT5_1full321_1G|DUSB_ECOLI|tRNA-dihydrouridine synthase B_P1
DUSC_ECOLI	full	1	315	35631.6	0	Unmodified	P33371_1full315_1G_P1_1T	35631.6	14	P33371_1full315_1G|DUSC_ECOLI|tRNA-dihydrouridine(16) synthase_P1
DUT_ECOLI	full	1	151	16242.3	0	Unmodified	P06968_1full151_1G_P1_1T	16242.3	5	P06968_1full151_1G|DUT_ECOLI|Deoxyuridine 5'-triphosphate nucleotidohydrolase_P1
DXR_ECOLI	full	1	398	43936.3	0	Unmodified	P45568_1full398_1G_P1_1T	43936.3	15	P45568_1full398_1G|DXR_ECOLI|1-deoxy-D-xylulose 5-phosphate reductoisomerase_P1
DXS_ECOLI	chain	2	620	68073.4	0	Unmodified	P77488_2frag620_1G_P1_1T	68073.4	36	P77488_2frag620_1G|DXS_ECOLI|1-deoxy-D-xylulose-5-phosphate synthase_P1
DXS_ECOLI	full	1	620	68204.4	0	Unmodified	P77488_1full620_1G_P1_1T	68204.4	36	P77488_1full620_1G|DXS_ECOLI|1-deoxy-D-xylulose-5-phosphate synthase_P1
DYR_ECOLI	full	1	159	18150	0	Unmodified	P0ABQ4_1full159_1G_P1_1T	18150	6	P0ABQ4_1full159_1G|DYR_ECOLI|Dihydrofolate reductase_P1
E4PD_ECOLI	chain	2	339	37453.4	0	Unmodified	P0A9B6_2frag339_1G_P1_1T	37453.4	10	P0A9B6_2frag339_1G|E4PD_ECOLI|D-erythrose-4-phosphate dehydrogenase_P1
E4PD_ECOLI	full	1	339	37584.4	0	Unmodified	P0A9B6_1full339_1G_P1_1T	37584.4	10	P0A9B6_1full339_1G|E4PD_ECOLI|D-erythrose-4-phosphate dehydrogenase_P1
EAEH_ECOLI	signal-peptide	1	25	3064.57	0	Unmodified	P36943_1frag25_1G_P1_1T	3064.57	2	P36943_1frag25_1G|EAEH_ECOLI|Putative attaching and effacing protein homolog_P1
EAEH_ECOLI	chain	26	295	30277	0	Unmodified	P36943_26frag295_1G_P1_1T	30277	12	P36943_26frag295_1G|EAEH_ECOLI|Putative attaching and effacing protein homolog_P1
EAEH_ECOLI	full	1	295	33323.6	0	Unmodified	P36943_1full295_1G_P1_1T	33323.6	14	P36943_1full295_1G|EAEH_ECOLI|Putative attaching and effacing protein homolog_P1
EAMA_ECOLI	full	1	299	32480.9	0	Unmodified	P31125_1full299_1G_P1_1T	32480.9	8	P31125_1full299_1G|EAMA_ECOLI|Probable amino-acid metabolite efflux pump_P1
EAMB_ECOLI	full	1	195	21437.5	0	Unmodified	P38101_1full195_1G_P1_1T	21437.5	4	P38101_1full195_1G|EAMB_ECOLI|Cysteine/O-acetylserine efflux protein_P1
EBGC_ECOLI	full	1	149	17745.9	0	Unmodified	P0AC73_1full149_1G_P1_1T	17745.9	9	P0AC73_1full149_1G|EBGC_ECOLI|Evolved beta-galactosidase subunit beta_P1
EBGR_ECOLI	full	1	327	36495.2	0	Unmodified	P06846_1full327_1G_P1_1T	36495.2	17	P06846_1full327_1G|EBGR_ECOLI|HTH-type transcriptional regulator EbgR_P1
ECNA_ECOLI	signal-peptide	1	18	1979.21	0	Unmodified	P0ADB4_1frag18_1G_P1_1T	1979.21	1	P0ADB4_1frag18_1G|ECNA_ECOLI|Entericidin A_P1
ECNA_ECOLI	peptide	19	41	2468.21	0	Unmodified	P0ADB4_19frag41_1G_P1_1T	2468.21	1	P0ADB4_19frag41_1G|ECNA_ECOLI|Entericidin A_P1
ECNA_ECOLI	full	1	41	4429.41	0	Unmodified	P0ADB4_1full41_1G_P1_1T	4429.41	2	P0ADB4_1full41_1G|ECNA_ECOLI|Entericidin A_P1
ECNB_ECOLI	signal-peptide	1	21	2220.35	0	Unmodified	P0ADB7_1frag21_1G_P1_1T	2220.35	2	P0ADB7_1frag21_1G|ECNB_ECOLI|Entericidin B_P1
ECNB_ECOLI	peptide	22	48	2685.25	0	Unmodified	P0ADB7_22frag48_1G_P1_1T	2685.25	1	P0ADB7_22frag48_1G|ECNB_ECOLI|Entericidin B_P1
ECNB_ECOLI	full	1	48	4887.59	0	Unmodified	P0ADB7_1full48_1G_P1_1T	4887.59	3	P0ADB7_1full48_1G|ECNB_ECOLI|Entericidin B_P1
ECOT_ECOLI	signal-peptide	1	20	2117.15	0	Unmodified	P23827_1frag20_1G_P1_1T	2117.15	1	P23827_1frag20_1G|ECOT_ECOLI|Ecotin_P1
ECOT_ECOLI	chain	21	162	16323.5	0	Unmodified	P23827_21frag162_1G_P1_1T	16323.5	15	P23827_21frag162_1G|ECOT_ECOLI|Ecotin_P1
ECOT_ECOLI	full	1	162	18422.7	0	Unmodified	P23827_1full162_1G_P1_1T	18422.7	16	P23827_1full162_1G|ECOT_ECOLI|Ecotin_P1
ECPA_ECOLI	signal-peptide	1	22	2299.36	0	Unmodified	P0AAA3_1frag22_1G_P1_1T	2299.36	3	P0AAA3_1frag22_1G|ECPA_ECOLI|Common pilus major fimbrillin subunit EcpA_P1
ECPA_ECOLI	chain	23	195	17897.9	0	Unmodified	P0AAA3_23frag195_1G_P1_1T	17897.9	7	P0AAA3_23frag195_1G|ECPA_ECOLI|Common pilus major fimbrillin subunit EcpA_P1
ECPA_ECOLI	full	1	195	20179.3	0	Unmodified	P0AAA3_1full195_1G_P1_1T	20179.3	10	P0AAA3_1full195_1G|ECPA_ECOLI|Common pilus major fimbrillin subunit EcpA_P1
ECPB_ECOLI	signal-peptide	1	20	2150.26	0	Unmodified	P77188_1frag20_1G_P1_1T	2150.26	2	P77188_1frag20_1G|ECPB_ECOLI|Probable fimbrial chaperone EcpB_P1
ECPB_ECOLI	chain	21	222	22595.7	0	Unmodified	P77188_21frag222_1G_P1_1T	22595.7	12	P77188_21frag222_1G|ECPB_ECOLI|Probable fimbrial chaperone EcpB_P1
ECPB_ECOLI	full	1	222	24728	0	Unmodified	P77188_1full222_1G_P1_1T	24728	14	P77188_1full222_1G|ECPB_ECOLI|Probable fimbrial chaperone EcpB_P1
ECPC_ECOLI	signal-peptide	1	29	3235.69	0	Unmodified	P77802_1frag29_1G_P1_1T	3235.69	1	P77802_1frag29_1G|ECPC_ECOLI|Probable outer membrane usher protein EcpC_P1
ECPC_ECOLI	chain	30	841	88261.3	0	Unmodified	P77802_30frag841_1G_P1_1T	88261.3	23	P77802_30frag841_1G|ECPC_ECOLI|Probable outer membrane usher protein EcpC_P1
ECPC_ECOLI	full	1	841	91479	0	Unmodified	P77802_1full841_1G_P1_1T	91479	24	P77802_1full841_1G|ECPC_ECOLI|Probable outer membrane usher protein EcpC_P1
ECPD_ECOLI	signal-peptide	1	23	2654.55	0	Unmodified	P77694_1frag23_1G_P1_1T	2654.55	0	P77694_1frag23_1G|ECPD_ECOLI|Fimbria adhesin EcpD_P1
ECPD_ECOLI	chain	24	547	57930.8	0	Unmodified	P77694_24frag547_1G_P1_1T	57930.8	19	P77694_24frag547_1G|ECPD_ECOLI|Fimbria adhesin EcpD_P1
ECPD_ECOLI	full	1	547	60567.4	0	Unmodified	P77694_1full547_1G_P1_1T	60567.4	19	P77694_1full547_1G|ECPD_ECOLI|Fimbria adhesin EcpD_P1
ECPE_ECOLI	signal-peptide	1	27	2996.67	0	Unmodified	P77263_1frag27_1G_P1_1T	2996.67	1	P77263_1frag27_1G|ECPE_ECOLI|Probable fimbrial chaperone EcpE_P1
ECPE_ECOLI	chain	28	236	23892.3	0	Unmodified	P77263_28frag236_1G_P1_1T	23892.3	10	P77263_28frag236_1G|ECPE_ECOLI|Probable fimbrial chaperone EcpE_P1
ECPE_ECOLI	full	1	236	26870.9	0	Unmodified	P77263_1full236_1G_P1_1T	26870.9	11	P77263_1full236_1G|ECPE_ECOLI|Probable fimbrial chaperone EcpE_P1
ECPR_ECOLI	full	1	196	23517.4	0	Unmodified	P71301_1full196_1G_P1_1T	23517.4	18	P71301_1full196_1G|ECPR_ECOLI|HTH-type transcriptional regulator EcpR_P1
EDD_ECOLI	full	1	603	65214.3	0	Unmodified	P0ADF6_1full603_1G_P1_1T	65214.3	20	P0ADF6_1full603_1G|EDD_ECOLI|Phosphogluconate dehydratase_P1
EFEB_ECOLI	signal-peptide	1	35	3836.03	0	Unmodified	P31545_1frag35_1G_P1_1T	3836.03	2	P31545_1frag35_1G|EFEB_ECOLI|Deferrochelatase/peroxidase EfeB_P1
EFEB_ECOLI	chain	36	423	43311.3	0	Unmodified	P31545_36frag423_1G_P1_1T	43311.3	20	P31545_36frag423_1G|EFEB_ECOLI|Deferrochelatase/peroxidase EfeB_P1
EFEB_ECOLI	full	1	423	47129.3	0	Unmodified	P31545_1full423_1G_P1_1T	47129.3	22	P31545_1full423_1G|EFEB_ECOLI|Deferrochelatase/peroxidase EfeB_P1
EFEO_ECOLI	signal-peptide	1	26	2843.46	0	Unmodified	P0AB24_1frag26_1G_P1_1T	2843.46	0	P0AB24_1frag26_1G|EFEO_ECOLI|Iron uptake system component EfeO_P1
EFEO_ECOLI	chain	27	375	38641.1	0	Unmodified	P0AB24_27frag375_1G_P1_1T	38641.1	30	P0AB24_27frag375_1G|EFEO_ECOLI|Iron uptake system component EfeO_P1
EFEO_ECOLI	full	1	375	41466.5	0	Unmodified	P0AB24_1full375_1G_P1_1T	41466.5	30	P0AB24_1full375_1G|EFEO_ECOLI|Iron uptake system component EfeO_P1
EFEU_ECOLI	full	1	276	30315	0	Unmodified	P75901_1full276_1G_P1_1T	30315	5	P75901_1full276_1G|EFEU_ECOLI|Putative inactive ferrous iron permease EfeU_P1
EFG_ECOLI	chain	2	704	77925.1	0	Unmodified	P0A6M8_2frag704_1G_P1_1T	77925.1	44	P0A6M8_2frag704_1G|EFG_ECOLI|Elongation factor G_P1
EFG_ECOLI	full	1	704	78056.2	0	Unmodified	P0A6M8_1full704_1G_P1_1T	78056.2	44	P0A6M8_1full704_1G|EFG_ECOLI|Elongation factor G_P1
EFP_ECOLI	chain	2	188	20608.6	0	Unmodified	P0A6N4_2frag188_1G_P1_1T	20608.6	13	P0A6N4_2frag188_1G|EFP_ECOLI|Elongation factor P_P1
EFP_ECOLI	full	1	188	20739.6	0	Unmodified	P0A6N4_1full188_1G_P1_1T	20739.6	13	P0A6N4_1full188_1G|EFP_ECOLI|Elongation factor P_P1
EFPL_ECOLI	full	1	190	21615.2	0	Unmodified	P0A6N8_1full190_1G_P1_1T	21615.2	12	P0A6N8_1full190_1G|EFPL_ECOLI|Elongation factor P-like protein_P1
EFTS_ECOLI	chain	2	283	30611.2	0	Unmodified	P0A6P1_2frag283_1G_P1_1T	30611.2	28	P0A6P1_2frag283_1G|EFTS_ECOLI|Elongation factor Ts_P1
EFTS_ECOLI	full	1	283	30742.2	0	Unmodified	P0A6P1_1full283_1G_P1_1T	30742.2	28	P0A6P1_1full283_1G|EFTS_ECOLI|Elongation factor Ts_P1
EFTU1_ECOLI	chain	2	394	43480.7	0	Unmodified	P0CE47_2frag394_1G_P1_1T	43480.7	23	P0CE47_2frag394_1G|EFTU1_ECOLI|Elongation factor Tu 1_P1
EFTU1_ECOLI	full	1	394	43611.7	0	Unmodified	P0CE47_1full394_1G_P1_1T	43611.7	23	P0CE47_1full394_1G|EFTU1_ECOLI|Elongation factor Tu 1_P1
EFTU2_ECOLI	chain	2	394	43510.7	0	Unmodified	P0CE48_2frag394_1G_P1_1T	43510.7	23	P0CE48_2frag394_1G|EFTU2_ECOLI|Elongation factor Tu 2_P1
EFTU2_ECOLI	full	1	394	43641.7	0	Unmodified	P0CE48_1full394_1G_P1_1T	43641.7	23	P0CE48_1full394_1G|EFTU2_ECOLI|Elongation factor Tu 2_P1
ELAA_ECOLI	full	1	153	17619.8	0	Unmodified	P0AEH3_1full153_1G_P1_1T	17619.8	5	P0AEH3_1full153_1G|ELAA_ECOLI|Protein ElaA_P1
ELAB_ECOLI	full	1	101	11354.9	0	Unmodified	P0AEH5_1full101_1G_P1_1T	11354.9	7	P0AEH5_1full101_1G|ELAB_ECOLI|Protein ElaB_P1
ELAD_ECOLI	full	1	403	46705	0	Unmodified	Q47013_1full403_1G_P1_1T	46705	32	Q47013_1full403_1G|ELAD_ECOLI|Protease ElaD_P1
ELBB_ECOLI	full	1	217	23324	0	Unmodified	P0ABU5_1full217_1G_P1_1T	23324	9	P0ABU5_1full217_1G|ELBB_ECOLI|Glyoxalase ElbB_P1
ELFA_ECOLI	signal-peptide	1	21	2259.2	0	Unmodified	P75855_1frag21_1G_P1_1T	2259.2	2	P75855_1frag21_1G|ELFA_ECOLI|Fimbrial subunit ElfA_P1
ELFA_ECOLI	chain	22	179	16670.2	0	Unmodified	P75855_22frag179_1G_P1_1T	16670.2	7	P75855_22frag179_1G|ELFA_ECOLI|Fimbrial subunit ElfA_P1
ELFA_ECOLI	full	1	179	18911.4	0	Unmodified	P75855_1full179_1G_P1_1T	18911.4	9	P75855_1full179_1G|ELFA_ECOLI|Fimbrial subunit ElfA_P1
ELFC_ECOLI	signal-peptide	1	35	3703.9	0	Unmodified	P75857_1frag35_1G_P1_1T	3703.9	0	P75857_1frag35_1G|ELFC_ECOLI|Probable outer membrane usher protein ElfC_P1
ELFC_ECOLI	chain	36	866	92005.7	0	Unmodified	P75857_36frag866_1G_P1_1T	92005.7	35	P75857_36frag866_1G|ELFC_ECOLI|Probable outer membrane usher protein ElfC_P1
ELFC_ECOLI	full	1	866	95691.6	0	Unmodified	P75857_1full866_1G_P1_1T	95691.6	35	P75857_1full866_1G|ELFC_ECOLI|Probable outer membrane usher protein ElfC_P1
ELFD_ECOLI	signal-peptide	1	26	2826.5	0	Unmodified	P75856_1frag26_1G_P1_1T	2826.5	2	P75856_1frag26_1G|ELFD_ECOLI|Probable fimbrial chaperone protein ElfD_P1
ELFD_ECOLI	chain	27	233	22944.2	0	Unmodified	P75856_27frag233_1G_P1_1T	22944.2	17	P75856_27frag233_1G|ELFD_ECOLI|Probable fimbrial chaperone protein ElfD_P1
ELFD_ECOLI	full	1	233	25752.7	0	Unmodified	P75856_1full233_1G_P1_1T	25752.7	19	P75856_1full233_1G|ELFD_ECOLI|Probable fimbrial chaperone protein ElfD_P1
ELFG_ECOLI	signal-peptide	1	28	3352.75	0	Unmodified	P75858_1frag28_1G_P1_1T	3352.75	1	P75858_1frag28_1G|ELFG_ECOLI|Uncharacterized fimbrial-like protein ElfG_P1
ELFG_ECOLI	chain	29	356	35150.4	0	Unmodified	P75858_29frag356_1G_P1_1T	35150.4	10	P75858_29frag356_1G|ELFG_ECOLI|Uncharacterized fimbrial-like protein ElfG_P1
ELFG_ECOLI	full	1	356	38485.1	0	Unmodified	P75858_1full356_1G_P1_1T	38485.1	11	P75858_1full356_1G|ELFG_ECOLI|Uncharacterized fimbrial-like protein ElfG_P1
ELYC_ECOLI	full	1	259	28728.5	0	Unmodified	P0AB01_1full259_1G_P1_1T	28728.5	10	P0AB01_1full259_1G|ELYC_ECOLI|Envelope biogenesis factor ElyC_P1
EMRA_ECOLI	full	1	390	42869.9	0	Unmodified	P27303_1full390_1G_P1_1T	42869.9	20	P27303_1full390_1G|EMRA_ECOLI|Multidrug export protein EmrA_P1
EMRB_ECOLI	full	1	512	56051.4	0	Unmodified	P0AEJ0_1full512_1G_P1_1T	56051.4	8	P0AEJ0_1full512_1G|EMRB_ECOLI|Multidrug export protein EmrB_P1
EMRD_ECOLI	full	1	394	42610.4	0	Unmodified	P31442_1full394_1G_P1_1T	42610.4	3	P31442_1full394_1G|EMRD_ECOLI|Multidrug resistance protein D_P1
EMRE_ECOLI	full	1	110	12129.4	0	Unmodified	P23895_1full110_1G_P1_1T	12129.4	1	P23895_1full110_1G|EMRE_ECOLI|Multidrug transporter EmrE_P1
EMRK_ECOLI	full	1	387	42751.3	0	Unmodified	P52599_1full387_1G_P1_1T	42751.3	24	P52599_1full387_1G|EMRK_ECOLI|Probable multidrug resistance protein EmrK_P1
EMRY_ECOLI	full	1	512	56508.7	0	Unmodified	P52600_1full512_1G_P1_1T	56508.7	11	P52600_1full512_1G|EMRY_ECOLI|Probable multidrug resistance protein EmrY_P1
EMTA_ECOLI	signal-peptide	1	15	1785.06	0	Unmodified	P0C960_1frag15_1G_P1_1T	1785.06	1	P0C960_1frag15_1G|EMTA_ECOLI|Endo-type membrane-bound lytic murein transglycosylase A_P1
EMTA_ECOLI	chain	16	203	20598.6	0	Unmodified	P0C960_16frag203_1G_P1_1T	20598.6	11	P0C960_16frag203_1G|EMTA_ECOLI|Endo-type membrane-bound lytic murein transglycosylase A_P1
EMTA_ECOLI	full	1	203	22365.6	0	Unmodified	P0C960_1full203_1G_P1_1T	22365.6	12	P0C960_1full203_1G|EMTA_ECOLI|Endo-type membrane-bound lytic murein transglycosylase A_P1
END1_ECOLI	signal-peptide	1	22	2270.21	0	Unmodified	P25736_1frag22_1G_P1_1T	2270.21	0	P25736_1frag22_1G|END1_ECOLI|Endonuclease-1_P1
END1_ECOLI	chain	23	235	25016.1	0	Unmodified	P25736_23frag235_1G_P1_1T	25016.1	15	P25736_23frag235_1G|END1_ECOLI|Endonuclease-1_P1
END1_ECOLI	full	1	235	27268.3	0	Unmodified	P25736_1full235_1G_P1_1T	27268.3	15	P25736_1full235_1G|END1_ECOLI|Endonuclease-1_P1
END3_ECOLI	full	1	211	24074.8	0	Unmodified	P0AB83_1full211_1G_P1_1T	24074.8	16	P0AB83_1full211_1G|END3_ECOLI|Endonuclease III_P1
END4_ECOLI	full	1	285	31906	0	Unmodified	P0A6C1_1full285_1G_P1_1T	31906	13	P0A6C1_1full285_1G|END4_ECOLI|Endonuclease 4_P1
END8_ECOLI	chain	2	263	30019.7	0	Unmodified	P50465_2frag263_1G_P1_1T	30019.7	12	P50465_2frag263_1G|END8_ECOLI|Endonuclease 8_P1
END8_ECOLI	full	1	263	30150.8	0	Unmodified	P50465_1full263_1G_P1_1T	30150.8	12	P50465_1full263_1G|END8_ECOLI|Endonuclease 8_P1
ENGB_ECOLI	full	1	210	23666.4	0	Unmodified	P0A6P7_1full210_1G_P1_1T	23666.4	15	P0A6P7_1full210_1G|ENGB_ECOLI|Probable GTP-binding protein EngB_P1
ENO_ECOLI	chain	2	432	45848.9	0	Unmodified	P0A6P9_2frag432_1G_P1_1T	45848.9	37	P0A6P9_2frag432_1G|ENO_ECOLI|Enolase_P1
ENO_ECOLI	full	1	432	45980	0	Unmodified	P0A6P9_1full432_1G_P1_1T	45980	37	P0A6P9_1full432_1G|ENO_ECOLI|Enolase_P1
ENTA_ECOLI	full	1	248	26411.4	0	Unmodified	P15047_1full248_1G_P1_1T	26411.4	8	P15047_1full248_1G|ENTA_ECOLI|2,3-dihydro-2,3-dihydroxybenzoate dehydrogenase_P1
ENTB_ECOLI	chain	2	285	32685.5	0	Unmodified	P0ADI4_2frag285_1G_P1_1T	32685.5	14	P0ADI4_2frag285_1G|ENTB_ECOLI|Enterobactin synthase component B_P1
ENTB_ECOLI	full	1	285	32816.5	0	Unmodified	P0ADI4_1full285_1G_P1_1T	32816.5	14	P0ADI4_1full285_1G|ENTB_ECOLI|Enterobactin synthase component B_P1
ENTC_ECOLI	full	1	391	43221.1	0	Unmodified	P0AEJ2_1full391_1G_P1_1T	43221.1	11	P0AEJ2_1full391_1G|ENTC_ECOLI|Isochorismate synthase EntC_P1
ENTD_ECOLI	full	1	206	23601.1	0	Unmodified	P19925_1full206_1G_P1_1T	23601.1	9	P19925_1full206_1G|ENTD_ECOLI|Enterobactin synthase component D_P1
ENTE_ECOLI	full	1	536	59716.6	0	Unmodified	P10378_1full536_1G_P1_1T	59716.6	16	P10378_1full536_1G|ENTE_ECOLI|Enterobactin synthase component E_P1
ENTF_ECOLI	full	1	1293	142843	0	Unmodified	P11454_1full1293_1G_P1_1T	142843	25	P11454_1full1293_1G|ENTF_ECOLI|Enterobactin synthase component F_P1
ENTH_ECOLI	full	1	137	15261.5	0	Unmodified	P0A8Y8_1full137_1G_P1_1T	15261.5	2	P0A8Y8_1full137_1G|ENTH_ECOLI|Proofreading thioesterase EntH_P1
ENTS_ECOLI	full	1	416	43472.8	0	Unmodified	P24077_1full416_1G_P1_1T	43472.8	6	P24077_1full416_1G|ENTS_ECOLI|Enterobactin exporter EntS_P1
ENVC_ECOLI	signal-peptide	1	34	3750.09	0	Unmodified	P37690_1frag34_1G_P1_1T	3750.09	1	P37690_1frag34_1G|ENVC_ECOLI|Murein hydrolase activator EnvC_P1
ENVC_ECOLI	chain	35	419	43075.7	0	Unmodified	P37690_35frag419_1G_P1_1T	43075.7	22	P37690_35frag419_1G|ENVC_ECOLI|Murein hydrolase activator EnvC_P1
ENVC_ECOLI	full	1	419	46807.8	0	Unmodified	P37690_1full419_1G_P1_1T	46807.8	23	P37690_1full419_1G|ENVC_ECOLI|Murein hydrolase activator EnvC_P1
ENVR_ECOLI	full	1	220	25449.1	0	Unmodified	P0ACT2_1full220_1G_P1_1T	25449.1	12	P0ACT2_1full220_1G|ENVR_ECOLI|Probable acrEF/envCD operon repressor_P1
ENVY_ECOLI	full	1	253	29617.5	0	Unmodified	P10805_1full253_1G_P1_1T	29617.5	13	P10805_1full253_1G|ENVY_ECOLI|Porin thermoregulatory protein EnvY_P1
ENVZ_ECOLI	full	1	450	50455.5	0	Unmodified	P0AEJ4_1full450_1G_P1_1T	50455.5	12	P0AEJ4_1full450_1G|ENVZ_ECOLI|Osmolarity sensor protein EnvZ_P1
EPMA_ECOLI	full	1	325	37309.6	0	Unmodified	P0A8N7_1full325_1G_P1_1T	37309.6	9	P0A8N7_1full325_1G|EPMA_ECOLI|Elongation factor P--(R)-beta-lysine ligase_P1
EPMB_ECOLI	full	1	342	39057.5	0	Unmodified	P39280_1full342_1G_P1_1T	39057.5	13	P39280_1full342_1G|EPMB_ECOLI|L-lysine 2,3-aminomutase_P1
EPMC_ECOLI	full	1	182	21449.3	0	Unmodified	P76938_1full182_1G_P1_1T	21449.3	4	P76938_1full182_1G|EPMC_ECOLI|Elongation factor P hydroxylase_P1
EPTA_ECOLI	full	1	547	62545.3	0	Unmodified	P30845_1full547_1G_P1_1T	62545.3	22	P30845_1full547_1G|EPTA_ECOLI|Phosphoethanolamine transferase EptA_P1
EPTB_ECOLI	full	1	563	64363	0	Unmodified	P37661_1full563_1G_P1_1T	64363	25	P37661_1full563_1G|EPTB_ECOLI|Kdo(2)-lipid A phosphoethanolamine 7''-transferase_P1
EPTC_ECOLI	full	1	577	66865.3	0	Unmodified	P0CB39_1full577_1G_P1_1T	66865.3	30	P0CB39_1full577_1G|EPTC_ECOLI|Phosphoethanolamine transferase EptC_P1
ERA_ECOLI	chain	2	301	33883.1	0	Unmodified	P06616_2frag301_1G_P1_1T	33883.1	21	P06616_2frag301_1G|ERA_ECOLI|GTPase Era_P1
ERA_ECOLI	full	1	301	34014.1	0	Unmodified	P06616_1full301_1G_P1_1T	34014.1	21	P06616_1full301_1G|ERA_ECOLI|GTPase Era_P1
ERFK_ECOLI	signal-peptide	1	21	2406.27	0	Unmodified	P39176_1frag21_1G_P1_1T	2406.27	0	P39176_1frag21_1G|ERFK_ECOLI|Probable L,D-transpeptidase ErfK/SrfK_P1
ERFK_ECOLI	chain	22	310	32171.5	0	Unmodified	P39176_22frag310_1G_P1_1T	32171.5	7	P39176_22frag310_1G|ERFK_ECOLI|Probable L,D-transpeptidase ErfK/SrfK_P1
ERFK_ECOLI	full	1	310	34559.8	0	Unmodified	P39176_1full310_1G_P1_1T	34559.8	7	P39176_1full310_1G|ERFK_ECOLI|Probable L,D-transpeptidase ErfK/SrfK_P1
ERPA_ECOLI	full	1	114	12303.9	0	Unmodified	P0ACC3_1full114_1G_P1_1T	12303.9	5	P0ACC3_1full114_1G|ERPA_ECOLI|Iron-sulfur cluster insertion protein ErpA_P1
ESSD_ECOLI	full	1	71	7829.21	0	Unmodified	P0A9R2_1full71_1G_P1_1T	7829.21	7	P0A9R2_1full71_1G|ESSD_ECOLI|Prophage lysis protein S homolog EssD_P1
ESSQ_ECOLI	full	1	71	7784.19	0	Unmodified	P77237_1full71_1G_P1_1T	7784.19	6	P77237_1full71_1G|ESSQ_ECOLI|Prophage lysis protein S homolog EssQ_P1
ETK_ECOLI	full	1	726	81471.9	0	Unmodified	P38134_1full726_1G_P1_1T	81471.9	35	P38134_1full726_1G|ETK_ECOLI|Tyrosine-protein kinase etk_P1
ETP_ECOLI	full	1	148	16569.7	0	Unmodified	P0ACZ2_1full148_1G_P1_1T	16569.7	10	P0ACZ2_1full148_1G|ETP_ECOLI|Low molecular weight protein-tyrosine-phosphatase Etp_P1
ETTA_ECOLI	chain	2	555	62667.8	0	Unmodified	P0A9W3_2frag555_1G_P1_1T	62667.8	35	P0A9W3_2frag555_1G|ETTA_ECOLI|Energy-dependent translational throttle protein EttA_P1
ETTA_ECOLI	full	1	555	62798.8	0	Unmodified	P0A9W3_1full555_1G_P1_1T	62798.8	35	P0A9W3_1full555_1G|ETTA_ECOLI|Energy-dependent translational throttle protein EttA_P1
EUTA_ECOLI	full	1	467	49933.4	0	Unmodified	P76551_1full467_1G_P1_1T	49933.4	10	P76551_1full467_1G|EUTA_ECOLI|Ethanolamine utilization protein EutA_P1
EUTB_ECOLI	full	1	453	50029.1	0	Unmodified	P0AEJ6_1full453_1G_P1_1T	50029.1	18	P0AEJ6_1full453_1G|EUTB_ECOLI|Ethanolamine ammonia-lyase heavy chain_P1
EUTC_ECOLI	full	1	295	32329.8	0	Unmodified	P19636_1full295_1G_P1_1T	32329.8	14	P19636_1full295_1G|EUTC_ECOLI|Ethanolamine ammonia-lyase light chain_P1
EUTD_ECOLI	full	1	338	36458.1	0	Unmodified	P77218_1full338_1G_P1_1T	36458.1	9	P77218_1full338_1G|EUTD_ECOLI|Ethanolamine utilization protein EutD_P1
EUTE_ECOLI	full	1	467	49444.2	0	Unmodified	P77445_1full467_1G_P1_1T	49444.2	21	P77445_1full467_1G|EUTE_ECOLI|Ethanolamine utilization protein EutE_P1
EUTG_ECOLI	full	1	395	41655.2	0	Unmodified	P76553_1full395_1G_P1_1T	41655.2	10	P76553_1full395_1G|EUTG_ECOLI|Ethanolamine utilization protein EutG_P1
EUTH_ECOLI	full	1	408	43125.8	0	Unmodified	P76552_1full408_1G_P1_1T	43125.8	15	P76552_1full408_1G|EUTH_ECOLI|Ethanolamine utilization protein EutH_P1
EUTJ_ECOLI	full	1	278	30363.5	0	Unmodified	P77277_1full278_1G_P1_1T	30363.5	9	P77277_1full278_1G|EUTJ_ECOLI|Ethanolamine utilization protein EutJ_P1
EUTK_ECOLI	signal-peptide	1	16	1615.83	0	Unmodified	P76540_1frag16_1G_P1_1T	1615.83	0	P76540_1frag16_1G|EUTK_ECOLI|Ethanolamine utilization protein EutK_P1
EUTK_ECOLI	chain	17	166	16445.7	0	Unmodified	P76540_17frag166_1G_P1_1T	16445.7	6	P76540_17frag166_1G|EUTK_ECOLI|Ethanolamine utilization protein EutK_P1
EUTK_ECOLI	full	1	166	18043.5	0	Unmodified	P76540_1full166_1G_P1_1T	18043.5	6	P76540_1full166_1G|EUTK_ECOLI|Ethanolamine utilization protein EutK_P1
EUTL_ECOLI	full	1	219	22919.6	0	Unmodified	P76541_1full219_1G_P1_1T	22919.6	4	P76541_1full219_1G|EUTL_ECOLI|Ethanolamine utilization protein EutL_P1
EUTM_ECOLI	signal-peptide	1	25	2626.36	0	Unmodified	P0ABF4_1frag25_1G_P1_1T	2626.36	1	P0ABF4_1frag25_1G|EUTM_ECOLI|Ethanolamine utilization protein EutM_P1
EUTM_ECOLI	chain	26	97	7404.96	0	Unmodified	P0ABF4_26frag97_1G_P1_1T	7404.96	4	P0ABF4_26frag97_1G|EUTM_ECOLI|Ethanolamine utilization protein EutM_P1
EUTM_ECOLI	full	1	97	10013.3	0	Unmodified	P0ABF4_1full97_1G_P1_1T	10013.3	5	P0ABF4_1full97_1G|EUTM_ECOLI|Ethanolamine utilization protein EutM_P1
EUTN_ECOLI	full	1	95	10153.2	0	Unmodified	P0AEJ8_1full95_1G_P1_1T	10153.2	4	P0AEJ8_1full95_1G|EUTN_ECOLI|Ethanolamine utilization protein EutN_P1
EUTP_ECOLI	full	1	159	17720	0	Unmodified	P76556_1full159_1G_P1_1T	17720	9	P76556_1full159_1G|EUTP_ECOLI|Ethanolamine utilization protein EutP_P1
EUTQ_ECOLI	full	1	233	25619.9	0	Unmodified	P76555_1full233_1G_P1_1T	25619.9	13	P76555_1full233_1G|EUTQ_ECOLI|Ethanolamine utilization protein EutQ_P1
EUTR_ECOLI	full	1	350	40450.6	0	Unmodified	P36547_1full350_1G_P1_1T	40450.6	11	P36547_1full350_1G|EUTR_ECOLI|HTH-type transcriptional regulator eutR_P1
EUTS_ECOLI	full	1	111	11747.2	0	Unmodified	P63746_1full111_1G_P1_1T	11747.2	6	P63746_1full111_1G|EUTS_ECOLI|Ethanolamine utilization protein EutS_P1
EUTT_ECOLI	full	1	267	30452.9	0	Unmodified	P65643_1full267_1G_P1_1T	30452.9	9	P65643_1full267_1G|EUTT_ECOLI|Ethanolamine utilization cobalamin adenosyltransferase_P1
EVGA_ECOLI	full	1	204	22983.1	0	Unmodified	P0ACZ4_1full204_1G_P1_1T	22983.1	17	P0ACZ4_1full204_1G|EVGA_ECOLI|DNA-binding transcriptional activator EvgA_P1
EVGS_ECOLI	signal-peptide	1	21	2574.3	0	Unmodified	P30855_1frag21_1G_P1_1T	2574.3	1	P30855_1frag21_1G|EVGS_ECOLI|Sensor protein EvgS_P1
EVGS_ECOLI	chain	22	1197	133291	0	Unmodified	P30855_22frag1197_1G_P1_1T	133291	62	P30855_22frag1197_1G|EVGS_ECOLI|Sensor protein EvgS_P1
EVGS_ECOLI	full	1	1197	135847	0	Unmodified	P30855_1full1197_1G_P1_1T	135847	63	P30855_1full1197_1G|EVGS_ECOLI|Sensor protein EvgS_P1
EX1_ECOLI	full	1	475	54919.8	0	Unmodified	P04995_1full475_1G_P1_1T	54919.8	21	P04995_1full475_1G|EX1_ECOLI|Exodeoxyribonuclease I_P1
EX3_ECOLI	full	1	268	31224.8	0	Unmodified	P09030_1full268_1G_P1_1T	31224.8	13	P09030_1full268_1G|EX3_ECOLI|Exodeoxyribonuclease III_P1
EX7L_ECOLI	full	1	456	52131.6	0	Unmodified	P04994_1full456_1G_P1_1T	52131.6	20	P04994_1full456_1G|EX7L_ECOLI|Exodeoxyribonuclease 7 large subunit_P1
EX7S_ECOLI	chain	2	80	8847.54	0	Unmodified	P0A8G9_2frag80_1G_P1_1T	8847.54	4	P0A8G9_2frag80_1G|EX7S_ECOLI|Exodeoxyribonuclease 7 small subunit_P1
EX7S_ECOLI	full	1	80	8978.58	0	Unmodified	P0A8G9_1full80_1G_P1_1T	8978.58	4	P0A8G9_1full80_1G|EX7S_ECOLI|Exodeoxyribonuclease 7 small subunit_P1
EXBB_ECOLI	full	1	244	26392	0	Unmodified	P0ABU7_1full244_1G_P1_1T	26392	8	P0ABU7_1full244_1G|EXBB_ECOLI|Biopolymer transport protein ExbB_P1
EXBD_ECOLI	full	1	141	15597	0	Unmodified	P0ABV2_1full141_1G_P1_1T	15597	10	P0ABV2_1full141_1G|EXBD_ECOLI|Biopolymer transport protein ExbD_P1
EXOD_ECOLI	full	1	87	10550.2	0	Unmodified	P75717_1full87_1G_P1_1T	10550.2	6	P75717_1full87_1G|EXOD_ECOLI|Putative uncharacterized protein ExoD_P1
EXOX_ECOLI	full	1	220	25359.9	0	Unmodified	P0AEK0_1full220_1G_P1_1T	25359.9	9	P0AEK0_1full220_1G|EXOX_ECOLI|Exodeoxyribonuclease 10_P1
EXUR_ECOLI	full	1	258	30043.2	0	Unmodified	P0ACL2_1full258_1G_P1_1T	30043.2	14	P0ACL2_1full258_1G|EXUR_ECOLI|Exu regulon transcriptional regulator_P1
EXUT_ECOLI	signal-peptide	1	31	3524.02	0	Unmodified	P0AA78_1frag31_1G_P1_1T	3524.02	2	P0AA78_1frag31_1G|EXUT_ECOLI|Hexuronate transporter_P1
EXUT_ECOLI	chain	32	432	43630.7	0	Unmodified	P0AA78_32frag432_1G_P1_1T	43630.7	11	P0AA78_32frag432_1G|EXUT_ECOLI|Hexuronate transporter_P1
EXUT_ECOLI	full	1	432	47136.7	0	Unmodified	P0AA78_1full432_1G_P1_1T	47136.7	13	P0AA78_1full432_1G|EXUT_ECOLI|Hexuronate transporter_P1
F16PA_ECOLI	full	1	332	37329.1	0	Unmodified	P0A993_1full332_1G_P1_1T	37329.1	22	P0A993_1full332_1G|F16PA_ECOLI|Fructose-1,6-bisphosphatase class 1_P1
FABA_ECOLI	chain	2	172	19027.8	0	Unmodified	P0A6Q3_2frag172_1G_P1_1T	19027.8	11	P0A6Q3_2frag172_1G|FABA_ECOLI|3-hydroxydecanoyl-[acyl-carrier-protein] dehydratase_P1
FABA_ECOLI	full	1	172	19158.9	0	Unmodified	P0A6Q3_1full172_1G_P1_1T	19158.9	11	P0A6Q3_1full172_1G|FABA_ECOLI|3-hydroxydecanoyl-[acyl-carrier-protein] dehydratase_P1
FABB_ECOLI	full	1	406	43056.4	0	Unmodified	P0A953_1full406_1G_P1_1T	43056.4	16	P0A953_1full406_1G|FABB_ECOLI|3-oxoacyl-[acyl-carrier-protein] synthase 1_P1
FABD_ECOLI	chain	2	309	32662.7	0	Unmodified	P0AAI9_2frag309_1G_P1_1T	32662.7	14	P0AAI9_2frag309_1G|FABD_ECOLI|Malonyl CoA-acyl carrier protein transacylase_P1
FABD_ECOLI	full	1	309	32793.7	0	Unmodified	P0AAI9_1full309_1G_P1_1T	32793.7	14	P0AAI9_1full309_1G|FABD_ECOLI|Malonyl CoA-acyl carrier protein transacylase_P1
FABF_ECOLI	chain	2	413	43251.9	0	Unmodified	P0AAI5_2frag413_1G_P1_1T	43251.9	17	P0AAI5_2frag413_1G|FABF_ECOLI|3-oxoacyl-[acyl-carrier-protein] synthase 2_P1
FABF_ECOLI	full	1	413	43382.9	0	Unmodified	P0AAI5_1full413_1G_P1_1T	43382.9	17	P0AAI5_1full413_1G|FABF_ECOLI|3-oxoacyl-[acyl-carrier-protein] synthase 2_P1
FABG_ECOLI	full	1	244	25624.3	0	Unmodified	P0AEK2_1full244_1G_P1_1T	25624.3	10	P0AEK2_1full244_1G|FABG_ECOLI|3-oxoacyl-[acyl-carrier-protein] reductase FabG_P1
FABH_ECOLI	full	1	317	33859.2	0	Unmodified	P0A6R0_1full317_1G_P1_1T	33859.2	10	P0A6R0_1full317_1G|FABH_ECOLI|3-oxoacyl-[acyl-carrier-protein] synthase 3_P1
FABI_ECOLI	chain	2	262	28039.3	0	Unmodified	P0AEK4_2frag262_1G_P1_1T	28039.3	12	P0AEK4_2frag262_1G|FABI_ECOLI|Enoyl-[acyl-carrier-protein] reductase [NADH] FabI_P1
FABI_ECOLI	full	1	262	28170.3	0	Unmodified	P0AEK4_1full262_1G_P1_1T	28170.3	12	P0AEK4_1full262_1G|FABI_ECOLI|Enoyl-[acyl-carrier-protein] reductase [NADH] FabI_P1
FABR_ECOLI	full	1	234	26592.8	0	Unmodified	P0ACU5_1full234_1G_P1_1T	26592.8	7	P0ACU5_1full234_1G|FABR_ECOLI|HTH-type transcriptional repressor FabR_P1
FABZ_ECOLI	full	1	151	17200.1	0	Unmodified	P0A6Q6_1full151_1G_P1_1T	17200.1	8	P0A6Q6_1full151_1G|FABZ_ECOLI|3-hydroxyacyl-[acyl-carrier-protein] dehydratase FabZ_P1
FADA_ECOLI	full	1	387	41336.9	0	Unmodified	P21151_1full387_1G_P1_1T	41336.9	11	P21151_1full387_1G|FADA_ECOLI|3-ketoacyl-CoA thiolase_P1
FADB_ECOLI	full	1	729	80261.3	0	Unmodified	P21177_1full729_1G_P1_1T	80261.3	54	P21177_1full729_1G|FADB_ECOLI|Fatty acid oxidation complex subunit alpha_P1
FADE_ECOLI	full	1	814	89952.5	0	Unmodified	Q47146_1full814_1G_P1_1T	89952.5	41	Q47146_1full814_1G|FADE_ECOLI|Acyl-coenzyme A dehydrogenase_P1
FADH_ECOLI	chain	2	672	73239.8	0	Unmodified	P42593_2frag672_1G_P1_1T	73239.8	21	P42593_2frag672_1G|FADH_ECOLI|2,4-dienoyl-CoA reductase [NADPH]_P1
FADH_ECOLI	full	1	672	73370.8	0	Unmodified	P42593_1full672_1G_P1_1T	73370.8	21	P42593_1full672_1G|FADH_ECOLI|2,4-dienoyl-CoA reductase [NADPH]_P1
FADI_ECOLI	full	1	436	46719.4	0	Unmodified	P76503_1full436_1G_P1_1T	46719.4	13	P76503_1full436_1G|FADI_ECOLI|3-ketoacyl-CoA thiolase_P1
FADJ_ECOLI	full	1	714	77857.5	0	Unmodified	P77399_1full714_1G_P1_1T	77857.5	40	P77399_1full714_1G|FADJ_ECOLI|Fatty acid oxidation complex subunit alpha_P1
FADK_ECOLI	full	1	566	63790.7	0	Unmodified	P38135_1full566_1G_P1_1T	63790.7	27	P38135_1full566_1G|FADK_ECOLI|Short-chain-fatty-acid--CoA ligase_P1
FADL_ECOLI	signal-peptide	1	25	2667.46	0	Unmodified	P10384_1frag25_1G_P1_1T	2667.46	2	P10384_1frag25_1G|FADL_ECOLI|Long-chain fatty acid transport protein_P1
FADL_ECOLI	chain	26	446	45974.3	0	Unmodified	P10384_26frag446_1G_P1_1T	45974.3	12	P10384_26frag446_1G|FADL_ECOLI|Long-chain fatty acid transport protein_P1
FADL_ECOLI	full	1	446	48623.7	0	Unmodified	P10384_1full446_1G_P1_1T	48623.7	14	P10384_1full446_1G|FADL_ECOLI|Long-chain fatty acid transport protein_P1
FADM_ECOLI	full	1	132	15184	0	Unmodified	P77712_1full132_1G_P1_1T	15184	6	P77712_1full132_1G|FADM_ECOLI|Long-chain acyl-CoA thioesterase FadM_P1
FADR_ECOLI	chain	2	239	26934	0	Unmodified	P0A8V6_2frag239_1G_P1_1T	26934	7	P0A8V6_2frag239_1G|FADR_ECOLI|Fatty acid metabolism regulator protein_P1
FADR_ECOLI	full	1	239	27065	0	Unmodified	P0A8V6_1full239_1G_P1_1T	27065	7	P0A8V6_1full239_1G|FADR_ECOLI|Fatty acid metabolism regulator protein_P1
FBPC_ECOLI	full	1	348	39301.1	0	Unmodified	P37009_1full348_1G_P1_1T	39301.1	12	P37009_1full348_1G|FBPC_ECOLI|Fe(3+) ions import ATP-binding protein FbpC_P1
FCL_ECOLI	full	1	321	36377.5	0	Unmodified	P32055_1full321_1G_P1_1T	36377.5	11	P32055_1full321_1G|FCL_ECOLI|GDP-L-fucose synthase_P1
FCTA_ECOLI	full	1	416	46374.5	0	Unmodified	P69902_1full416_1G_P1_1T	46374.5	22	P69902_1full416_1G|FCTA_ECOLI|Formyl-CoA:oxalate CoA-transferase_P1
FDHD_ECOLI	full	1	277	31019.8	0	Unmodified	P32177_1full277_1G_P1_1T	31019.8	10	P32177_1full277_1G|FDHD_ECOLI|Sulfurtransferase FdhD_P1
FDHE_ECOLI	full	1	309	35308.7	0	Unmodified	P13024_1full309_1G_P1_1T	35308.7	16	P13024_1full309_1G|FDHE_ECOLI|Protein FdhE_P1
FDHF_ECOLI	full	1	715	80341.3	0	Unmodified	P07658_1full715_1G_P1_1T	80341.3	39	P07658_1full715_1G|FDHF_ECOLI|Formate dehydrogenase H_P1
FDNG_ECOLI	signal-peptide	1	33	3485.81	0	Unmodified	P24183_1frag33_1G_P1_1T	3485.81	2	P24183_1frag33_1G|FDNG_ECOLI|Formate dehydrogenase, nitrate-inducible, major subunit_P1
FDNG_ECOLI	chain	34	1015	110440	0	Unmodified	P24183_34frag1015_1G_P1_1T	110440	51	P24183_34frag1015_1G|FDNG_ECOLI|Formate dehydrogenase, nitrate-inducible, major subunit_P1
FDNG_ECOLI	full	1	1015	113908	0	Unmodified	P24183_1full1015_1G_P1_1T	113908	53	P24183_1full1015_1G|FDNG_ECOLI|Formate dehydrogenase, nitrate-inducible, major subunit_P1
FDNH_ECOLI	full	1	294	33347.2	0	Unmodified	P0AAJ3_1full294_1G_P1_1T	33347.2	20	P0AAJ3_1full294_1G|FDNH_ECOLI|Formate dehydrogenase, nitrate-inducible, iron-sulfur subunit_P1
FDNI_ECOLI	full	1	217	25601.7	0	Unmodified	P0AEK7_1full217_1G_P1_1T	25601.7	17	P0AEK7_1full217_1G|FDNI_ECOLI|Formate dehydrogenase, nitrate-inducible, cytochrome b556(Fdn) subunit_P1
FDOG_ECOLI	signal-peptide	1	33	3392.74	0	Unmodified	P32176_1frag33_1G_P1_1T	3392.74	1	P32176_1frag33_1G|FDOG_ECOLI|Formate dehydrogenase-O major subunit_P1
FDOG_ECOLI	chain	34	1016	110232	0	Unmodified	P32176_34frag1016_1G_P1_1T	110232	59	P32176_34frag1016_1G|FDOG_ECOLI|Formate dehydrogenase-O major subunit_P1
FDOG_ECOLI	full	1	1016	113607	0	Unmodified	P32176_1full1016_1G_P1_1T	113607	60	P32176_1full1016_1G|FDOG_ECOLI|Formate dehydrogenase-O major subunit_P1
FDOH_ECOLI	full	1	300	34127.5	0	Unmodified	P0AAJ5_1full300_1G_P1_1T	34127.5	17	P0AAJ5_1full300_1G|FDOH_ECOLI|Formate dehydrogenase-O iron-sulfur subunit_P1
FDOI_ECOLI	full	1	211	24784.3	0	Unmodified	P0AEL0_1full211_1G_P1_1T	24784.3	10	P0AEL0_1full211_1G|FDOI_ECOLI|Formate dehydrogenase, cytochrome b556(fdo) subunit_P1
FDRA_ECOLI	full	1	555	59216.5	0	Unmodified	Q47208_1full555_1G_P1_1T	59216.5	18	Q47208_1full555_1G|FDRA_ECOLI|Protein FdrA_P1
FEAB_ECOLI	full	1	499	54249.7	0	Unmodified	P80668_1full499_1G_P1_1T	54249.7	16	P80668_1full499_1G|FEAB_ECOLI|Phenylacetaldehyde dehydrogenase_P1
FEAR_ECOLI	full	1	301	34963.7	0	Unmodified	Q47129_1full301_1G_P1_1T	34963.7	10	Q47129_1full301_1G|FEAR_ECOLI|Transcriptional activator FeaR_P1
FECA_ECOLI	signal-peptide	1	33	3638.1	0	Unmodified	P13036_1frag33_1G_P1_1T	3638.1	1	P13036_1frag33_1G|FECA_ECOLI|Fe(3+) dicitrate transport protein FecA_P1
FECA_ECOLI	chain	34	774	81841.2	0	Unmodified	P13036_34frag774_1G_P1_1T	81841.2	23	P13036_34frag774_1G|FECA_ECOLI|Fe(3+) dicitrate transport protein FecA_P1
FECA_ECOLI	full	1	774	85461.3	0	Unmodified	P13036_1full774_1G_P1_1T	85461.3	24	P13036_1full774_1G|FECA_ECOLI|Fe(3+) dicitrate transport protein FecA_P1
FECB_ECOLI	signal-peptide	1	21	2349.34	0	Unmodified	P15028_1frag21_1G_P1_1T	2349.34	0	P15028_1frag21_1G|FECB_ECOLI|Fe(3+) dicitrate-binding periplasmic protein_P1
FECB_ECOLI	chain	22	300	30898.4	0	Unmodified	P15028_22frag300_1G_P1_1T	30898.4	13	P15028_22frag300_1G|FECB_ECOLI|Fe(3+) dicitrate-binding periplasmic protein_P1
FECB_ECOLI	full	1	300	33229.8	0	Unmodified	P15028_1full300_1G_P1_1T	33229.8	13	P15028_1full300_1G|FECB_ECOLI|Fe(3+) dicitrate-binding periplasmic protein_P1
FECC_ECOLI	full	1	332	35171.3	0	Unmodified	P15030_1full332_1G_P1_1T	35171.3	2	P15030_1full332_1G|FECC_ECOLI|Fe(3+) dicitrate transport system permease protein FecC_P1
FECD_ECOLI	full	1	318	34377.1	0	Unmodified	P15029_1full318_1G_P1_1T	34377.1	5	P15029_1full318_1G|FECD_ECOLI|Fe(3+) dicitrate transport system permease protein FecD_P1
FECE_ECOLI	full	1	255	28432.7	0	Unmodified	P15031_1full255_1G_P1_1T	28432.7	4	P15031_1full255_1G|FECE_ECOLI|Fe(3+) dicitrate transport ATP-binding protein FecE_P1
FECI_ECOLI	chain	2	173	19523.1	0	Unmodified	P23484_2frag173_1G_P1_1T	19523.1	9	P23484_2frag173_1G|FECI_ECOLI|Probable RNA polymerase sigma factor FecI_P1
FECI_ECOLI	full	1	173	19654.2	0	Unmodified	P23484_1full173_1G_P1_1T	19654.2	9	P23484_1full173_1G|FECI_ECOLI|Probable RNA polymerase sigma factor FecI_P1
FECR_ECOLI	full	1	317	35639.6	0	Unmodified	P23485_1full317_1G_P1_1T	35639.6	9	P23485_1full317_1G|FECR_ECOLI|Protein FecR_P1
FENR_ECOLI	chain	2	248	27812.5	0	Unmodified	P28861_2frag248_1G_P1_1T	27812.5	12	P28861_2frag248_1G|FENR_ECOLI|Ferredoxin--NADP reductase_P1
FENR_ECOLI	full	1	248	27943.5	0	Unmodified	P28861_1full248_1G_P1_1T	27943.5	12	P28861_1full248_1G|FENR_ECOLI|Ferredoxin--NADP reductase_P1
FEOA_ECOLI	full	1	75	8454.58	0	Unmodified	P0AEL3_1full75_1G_P1_1T	8454.58	4	P0AEL3_1full75_1G|FEOA_ECOLI|Fe(2+) transport protein A_P1
FEOB_ECOLI	full	1	773	85279.4	0	Unmodified	P33650_1full773_1G_P1_1T	85279.4	22	P33650_1full773_1G|FEOB_ECOLI|Fe(2+) transporter FeoB_P1
FEOC_ECOLI	full	1	78	8906.45	0	Unmodified	P64638_1full78_1G_P1_1T	8906.45	3	P64638_1full78_1G|FEOC_ECOLI|Probable [Fe-S]-dependent transcriptional repressor FeoC_P1
FEPA_ECOLI	signal-peptide	1	22	2368.36	0	Unmodified	P05825_1frag22_1G_P1_1T	2368.36	2	P05825_1frag22_1G|FEPA_ECOLI|Ferrienterobactin receptor_P1
FEPA_ECOLI	chain	23	746	80084.6	0	Unmodified	P05825_23frag746_1G_P1_1T	80084.6	31	P05825_23frag746_1G|FEPA_ECOLI|Ferrienterobactin receptor_P1
FEPA_ECOLI	full	1	746	82435	0	Unmodified	P05825_1full746_1G_P1_1T	82435	33	P05825_1full746_1G|FEPA_ECOLI|Ferrienterobactin receptor_P1
FEPB_ECOLI	signal-peptide	1	26	2737.6	0	Unmodified	P0AEL6_1frag26_1G_P1_1T	2737.6	0	P0AEL6_1frag26_1G|FEPB_ECOLI|Ferrienterobactin-binding periplasmic protein_P1
FEPB_ECOLI	chain	27	318	31646.6	0	Unmodified	P0AEL6_27frag318_1G_P1_1T	31646.6	13	P0AEL6_27frag318_1G|FEPB_ECOLI|Ferrienterobactin-binding periplasmic protein_P1
FEPB_ECOLI	full	1	318	34366.2	0	Unmodified	P0AEL6_1full318_1G_P1_1T	34366.2	13	P0AEL6_1full318_1G|FEPB_ECOLI|Ferrienterobactin-binding periplasmic protein_P1
FEPC_ECOLI	full	1	271	30000.7	0	Unmodified	P23878_1full271_1G_P1_1T	30000.7	8	P23878_1full271_1G|FEPC_ECOLI|Ferric enterobactin transport ATP-binding protein FepC_P1
FEPD_ECOLI	full	1	334	34045	0	Unmodified	P23876_1full334_1G_P1_1T	34045	3	P23876_1full334_1G|FEPD_ECOLI|Ferric enterobactin transport system permease protein FepD_P1
FEPE_ECOLI	full	1	377	42459.7	0	Unmodified	P26266_1full377_1G_P1_1T	42459.7	34	P26266_1full377_1G|FEPE_ECOLI|Ferric enterobactin transport protein FepE_P1
FEPG_ECOLI	full	1	330	35204.3	0	Unmodified	P23877_1full330_1G_P1_1T	35204.3	4	P23877_1full330_1G|FEPG_ECOLI|Ferric enterobactin transport system permease protein FepG_P1
FER_ECOLI	chain	2	111	12615	0	Unmodified	P0A9R4_2frag111_1G_P1_1T	12615	3	P0A9R4_2frag111_1G|FER_ECOLI|2Fe-2S ferredoxin_P1
FER_ECOLI	full	1	111	12746	0	Unmodified	P0A9R4_1full111_1G_P1_1T	12746	3	P0A9R4_1full111_1G|FER_ECOLI|2Fe-2S ferredoxin_P1
FES_ECOLI	full	1	400	46012.3	0	Unmodified	P13039_1full400_1G_P1_1T	46012.3	13	P13039_1full400_1G|FES_ECOLI|Enterochelin esterase_P1
FETA_ECOLI	full	1	225	25568.3	0	Unmodified	P77279_1full225_1G_P1_1T	25568.3	11	P77279_1full225_1G|FETA_ECOLI|Probable iron export ATP-binding protein FetA_P1
FETB_ECOLI	full	1	259	28445.8	0	Unmodified	P77307_1full259_1G_P1_1T	28445.8	16	P77307_1full259_1G|FETB_ECOLI|Probable iron export permease protein FetB_P1
FETP_ECOLI	chain	2	91	10943.5	0	Unmodified	P0A8P3_2frag91_1G_P1_1T	10943.5	9	P0A8P3_2frag91_1G|FETP_ECOLI|Probable Fe(2+)-trafficking protein_P1
FETP_ECOLI	full	1	91	11074.6	0	Unmodified	P0A8P3_1full91_1G_P1_1T	11074.6	9	P0A8P3_1full91_1G|FETP_ECOLI|Probable Fe(2+)-trafficking protein_P1
FHLA_ECOLI	full	1	692	79164.2	0	Unmodified	P19323_1full692_1G_P1_1T	79164.2	29	P19323_1full692_1G|FHLA_ECOLI|Formate hydrogenlyase transcriptional activator FhlA_P1
FHUA_ECOLI	signal-peptide	1	33	3479.93	0	Unmodified	P06971_1frag33_1G_P1_1T	3479.93	3	P06971_1frag33_1G|FHUA_ECOLI|Ferrichrome-iron receptor_P1
FHUA_ECOLI	chain	34	747	79218	0	Unmodified	P06971_34frag747_1G_P1_1T	79218	37	P06971_34frag747_1G|FHUA_ECOLI|Ferrichrome-iron receptor_P1
FHUA_ECOLI	full	1	747	82680	0	Unmodified	P06971_1full747_1G_P1_1T	82680	40	P06971_1full747_1G|FHUA_ECOLI|Ferrichrome-iron receptor_P1
FHUB_ECOLI	full	1	660	70758.7	0	Unmodified	P06972_1full660_1G_P1_1T	70758.7	5	P06972_1full660_1G|FHUB_ECOLI|Iron(3+)-hydroxamate import system permease protein FhuB_P1
FHUC_ECOLI	full	1	265	29038.2	0	Unmodified	P07821_1full265_1G_P1_1T	29038.2	7	P07821_1full265_1G|FHUC_ECOLI|Iron(3+)-hydroxamate import ATP-binding protein FhuC_P1
FHUD_ECOLI	signal-peptide	1	30	3347.81	0	Unmodified	P07822_1frag30_1G_P1_1T	3347.81	0	P07822_1frag30_1G|FHUD_ECOLI|Iron(3+)-hydroxamate-binding protein FhuD_P1
FHUD_ECOLI	chain	31	296	29768.3	0	Unmodified	P07822_31frag296_1G_P1_1T	29768.3	8	P07822_31frag296_1G|FHUD_ECOLI|Iron(3+)-hydroxamate-binding protein FhuD_P1
FHUD_ECOLI	full	1	296	33098.1	0	Unmodified	P07822_1full296_1G_P1_1T	33098.1	8	P07822_1full296_1G|FHUD_ECOLI|Iron(3+)-hydroxamate-binding protein FhuD_P1
FHUE_ECOLI	signal-peptide	1	36	3902.03	0	Unmodified	P16869_1frag36_1G_P1_1T	3902.03	1	P16869_1frag36_1G|FHUE_ECOLI|FhuE receptor_P1
FHUE_ECOLI	chain	37	729	77555.4	0	Unmodified	P16869_37frag729_1G_P1_1T	77555.4	24	P16869_37frag729_1G|FHUE_ECOLI|FhuE receptor_P1
FHUE_ECOLI	full	1	729	81439.5	0	Unmodified	P16869_1full729_1G_P1_1T	81439.5	25	P16869_1full729_1G|FHUE_ECOLI|FhuE receptor_P1
FHUF_ECOLI	full	1	262	30499.6	0	Unmodified	P39405_1full262_1G_P1_1T	30499.6	8	P39405_1full262_1G|FHUF_ECOLI|Ferric iron reductase protein FhuF_P1
FIC_ECOLI	full	1	200	23107.6	0	Unmodified	P20605_1full200_1G_P1_1T	23107.6	6	P20605_1full200_1G|FIC_ECOLI|Probable adenosine monophosphate-protein transferase fic_P1
FIEF_ECOLI	full	1	300	33044.3	0	Unmodified	P69380_1full300_1G_P1_1T	33044.3	3	P69380_1full300_1G|FIEF_ECOLI|Ferrous-iron efflux pump FieF_P1
FIMA1_ECOLI	signal-peptide	1	23	2316.4	0	Unmodified	P04128_1frag23_1G_P1_1T	2316.4	2	P04128_1frag23_1G|FIMA1_ECOLI|Type-1 fimbrial protein, A chain_P1
FIMA1_ECOLI	chain	24	182	15955.9	0	Unmodified	P04128_24frag182_1G_P1_1T	15955.9	3	P04128_24frag182_1G|FIMA1_ECOLI|Type-1 fimbrial protein, A chain_P1
FIMA1_ECOLI	full	1	182	18254.3	0	Unmodified	P04128_1full182_1G_P1_1T	18254.3	5	P04128_1full182_1G|FIMA1_ECOLI|Type-1 fimbrial protein, A chain_P1
FIMB_ECOLI	full	1	200	23360.2	0	Unmodified	P0ADH5_1full200_1G_P1_1T	23360.2	12	P0ADH5_1full200_1G|FIMB_ECOLI|Type 1 fimbriae regulatory protein FimB_P1
FIMC_ECOLI	signal-peptide	1	36	4047.04	0	Unmodified	P31697_1frag36_1G_P1_1T	4047.04	2	P31697_1frag36_1G|FIMC_ECOLI|Chaperone protein FimC_P1
FIMC_ECOLI	chain	37	241	22820.1	0	Unmodified	P31697_37frag241_1G_P1_1T	22820.1	13	P31697_37frag241_1G|FIMC_ECOLI|Chaperone protein FimC_P1
FIMC_ECOLI	full	1	241	26849.1	0	Unmodified	P31697_1full241_1G_P1_1T	26849.1	15	P31697_1full241_1G|FIMC_ECOLI|Chaperone protein FimC_P1
FIMD_ECOLI	signal-peptide	1	45	5254.79	0	Unmodified	P30130_1frag45_1G_P1_1T	5254.79	1	P30130_1frag45_1G|FIMD_ECOLI|Outer membrane usher protein FimD_P1
FIMD_ECOLI	chain	46	878	91720.3	0	Unmodified	P30130_46frag878_1G_P1_1T	91720.3	23	P30130_46frag878_1G|FIMD_ECOLI|Outer membrane usher protein FimD_P1
FIMD_ECOLI	full	1	878	96957.1	0	Unmodified	P30130_1full878_1G_P1_1T	96957.1	24	P30130_1full878_1G|FIMD_ECOLI|Outer membrane usher protein FimD_P1
FIME_ECOLI	full	1	198	23321	0	Unmodified	P0ADH7_1full198_1G_P1_1T	23321	6	P0ADH7_1full198_1G|FIME_ECOLI|Type 1 fimbriae regulatory protein FimE_P1
FIMF_ECOLI	signal-peptide	1	20	2444.27	0	Unmodified	P08189_1frag20_1G_P1_1T	2444.27	1	P08189_1frag20_1G|FIMF_ECOLI|Protein FimF_P1
FIMF_ECOLI	chain	21	176	16480.4	0	Unmodified	P08189_21frag176_1G_P1_1T	16480.4	3	P08189_21frag176_1G|FIMF_ECOLI|Protein FimF_P1
FIMF_ECOLI	full	1	176	18906.7	0	Unmodified	P08189_1full176_1G_P1_1T	18906.7	4	P08189_1full176_1G|FIMF_ECOLI|Protein FimF_P1
FIMG_ECOLI	signal-peptide	1	23	2550.41	0	Unmodified	P08190_1frag23_1G_P1_1T	2550.41	2	P08190_1frag23_1G|FIMG_ECOLI|Protein FimG_P1
FIMG_ECOLI	chain	24	167	14993.4	0	Unmodified	P08190_24frag167_1G_P1_1T	14993.4	4	P08190_24frag167_1G|FIMG_ECOLI|Protein FimG_P1
FIMG_ECOLI	full	1	167	17525.8	0	Unmodified	P08190_1full167_1G_P1_1T	17525.8	6	P08190_1full167_1G|FIMG_ECOLI|Protein FimG_P1
FIMH_ECOLI	signal-peptide	1	21	2429.32	0	Unmodified	P08191_1frag21_1G_P1_1T	2429.32	1	P08191_1frag21_1G|FIMH_ECOLI|Protein FimH_P1
FIMH_ECOLI	chain	22	300	29318.8	0	Unmodified	P08191_22frag300_1G_P1_1T	29318.8	5	P08191_22frag300_1G|FIMH_ECOLI|Protein FimH_P1
FIMH_ECOLI	full	1	300	31730.1	0	Unmodified	P08191_1full300_1G_P1_1T	31730.1	6	P08191_1full300_1G|FIMH_ECOLI|Protein FimH_P1
FIMI_ECOLI	signal-peptide	1	19	2234.35	0	Unmodified	P39264_1frag19_1G_P1_1T	2234.35	2	P39264_1frag19_1G|FIMI_ECOLI|Fimbrin-like protein FimI_P1
FIMI_ECOLI	chain	20	179	17314.8	0	Unmodified	P39264_20frag179_1G_P1_1T	17314.8	5	P39264_20frag179_1G|FIMI_ECOLI|Fimbrin-like protein FimI_P1
FIMI_ECOLI	full	1	179	19531.1	0	Unmodified	P39264_1full179_1G_P1_1T	19531.1	7	P39264_1full179_1G|FIMI_ECOLI|Fimbrin-like protein FimI_P1
FIMZ_ECOLI	full	1	210	23947.8	0	Unmodified	P0AEL8_1full210_1G_P1_1T	23947.8	16	P0AEL8_1full210_1G|FIMZ_ECOLI|Fimbriae Z protein_P1
FIS_ECOLI	full	1	98	11288.9	0	Unmodified	P0A6R3_1full98_1G_P1_1T	11288.9	7	P0A6R3_1full98_1G|FIS_ECOLI|DNA-binding protein Fis_P1
FIU_ECOLI	signal-peptide	1	31	3506.73	0	Unmodified	P75780_1frag31_1G_P1_1T	3506.73	0	P75780_1frag31_1G|FIU_ECOLI|Catecholate siderophore receptor Fiu_P1
FIU_ECOLI	chain	32	760	78808.6	0	Unmodified	P75780_32frag760_1G_P1_1T	78808.6	27	P75780_32frag760_1G|FIU_ECOLI|Catecholate siderophore receptor Fiu_P1
FIU_ECOLI	full	1	760	82297.4	0	Unmodified	P75780_1full760_1G_P1_1T	82297.4	27	P75780_1full760_1G|FIU_ECOLI|Catecholate siderophore receptor Fiu_P1
FIXA_ECOLI	full	1	256	27475.3	0	Unmodified	P60566_1full256_1G_P1_1T	27475.3	15	P60566_1full256_1G|FIXA_ECOLI|Protein FixA_P1
FIXB_ECOLI	full	1	313	33726.5	0	Unmodified	P31574_1full313_1G_P1_1T	33726.5	15	P31574_1full313_1G|FIXB_ECOLI|Protein FixB_P1
FIXC_ECOLI	full	1	428	46110	0	Unmodified	P68644_1full428_1G_P1_1T	46110	26	P68644_1full428_1G|FIXC_ECOLI|Protein FixC_P1
FIXX_ECOLI	full	1	95	10756.4	0	Unmodified	P68646_1full95_1G_P1_1T	10756.4	7	P68646_1full95_1G|FIXX_ECOLI|Ferredoxin-like protein FixX_P1
FKBA_ECOLI	signal-peptide	1	25	2690.52	0	Unmodified	P45523_1frag25_1G_P1_1T	2690.52	2	P45523_1frag25_1G|FKBA_ECOLI|FKBP-type peptidyl-prolyl cis-trans isomerase FkpA_P1
FKBA_ECOLI	chain	26	270	26488.2	0	Unmodified	P45523_26frag270_1G_P1_1T	26488.2	35	P45523_26frag270_1G|FKBA_ECOLI|FKBP-type peptidyl-prolyl cis-trans isomerase FkpA_P1
FKBA_ECOLI	full	1	270	29160.7	0	Unmodified	P45523_1full270_1G_P1_1T	29160.7	37	P45523_1full270_1G|FKBA_ECOLI|FKBP-type peptidyl-prolyl cis-trans isomerase FkpA_P1
FKBB_ECOLI	chain	2	206	22119.6	0	Unmodified	P0A9L3_2frag206_1G_P1_1T	22119.6	6	P0A9L3_2frag206_1G|FKBB_ECOLI|FKBP-type 22 kDa peptidyl-prolyl cis-trans isomerase_P1
FKBB_ECOLI	full	1	206	22250.6	0	Unmodified	P0A9L3_1full206_1G_P1_1T	22250.6	6	P0A9L3_1full206_1G|FKBB_ECOLI|FKBP-type 22 kDa peptidyl-prolyl cis-trans isomerase_P1
FKBX_ECOLI	chain	2	149	15971.9	0	Unmodified	P0AEM0_2frag149_1G_P1_1T	15971.9	4	P0AEM0_2frag149_1G|FKBX_ECOLI|FKBP-type 16 kDa peptidyl-prolyl cis-trans isomerase_P1
FKBX_ECOLI	full	1	149	16103	0	Unmodified	P0AEM0_1full149_1G_P1_1T	16103	4	P0AEM0_1full149_1G|FKBX_ECOLI|FKBP-type 16 kDa peptidyl-prolyl cis-trans isomerase_P1
FLAV_ECOLI	chain	2	176	19836.7	0	Unmodified	P61949_2frag176_1G_P1_1T	19836.7	9	P61949_2frag176_1G|FLAV_ECOLI|Flavodoxin 1_P1
FLAV_ECOLI	full	1	176	19967.7	0	Unmodified	P61949_1full176_1G_P1_1T	19967.7	9	P61949_1full176_1G|FLAV_ECOLI|Flavodoxin 1_P1
FLAW_ECOLI	full	1	173	19865.7	0	Unmodified	P0ABY4_1full173_1G_P1_1T	19865.7	8	P0ABY4_1full173_1G|FLAW_ECOLI|Flavodoxin 2_P1
FLGA_ECOLI	signal-peptide	1	21	2264.38	0	Unmodified	P75933_1frag21_1G_P1_1T	2264.38	1	P75933_1frag21_1G|FLGA_ECOLI|Flagella basal body P-ring formation protein FlgA_P1
FLGA_ECOLI	chain	22	219	21420.3	0	Unmodified	P75933_22frag219_1G_P1_1T	21420.3	5	P75933_22frag219_1G|FLGA_ECOLI|Flagella basal body P-ring formation protein FlgA_P1
FLGA_ECOLI	full	1	219	23666.7	0	Unmodified	P75933_1full219_1G_P1_1T	23666.7	6	P75933_1full219_1G|FLGA_ECOLI|Flagella basal body P-ring formation protein FlgA_P1
FLGB_ECOLI	full	1	138	15262.7	0	Unmodified	P0ABW9_1full138_1G_P1_1T	15262.7	4	P0ABW9_1full138_1G|FLGB_ECOLI|Flagellar basal body rod protein FlgB_P1
FLGC_ECOLI	full	1	134	14015.2	0	Unmodified	P0ABX2_1full134_1G_P1_1T	14015.2	7	P0ABX2_1full134_1G|FLGC_ECOLI|Flagellar basal-body rod protein FlgC_P1
FLGD_ECOLI	full	1	231	23592.9	0	Unmodified	P75936_1full231_1G_P1_1T	23592.9	4	P75936_1full231_1G|FLGD_ECOLI|Basal-body rod modification protein FlgD_P1
FLGE_ECOLI	chain	2	402	41984.6	0	Unmodified	P75937_2frag402_1G_P1_1T	41984.6	12	P75937_2frag402_1G|FLGE_ECOLI|Flagellar hook protein FlgE_P1
FLGE_ECOLI	full	1	402	42115.6	0	Unmodified	P75937_1full402_1G_P1_1T	42115.6	12	P75937_1full402_1G|FLGE_ECOLI|Flagellar hook protein FlgE_P1
FLGF_ECOLI	full	1	251	25928.1	0	Unmodified	P75938_1full251_1G_P1_1T	25928.1	4	P75938_1full251_1G|FLGF_ECOLI|Flagellar basal-body rod protein FlgF_P1
FLGG_ECOLI	full	1	260	27775	0	Unmodified	P0ABX5_1full260_1G_P1_1T	27775	6	P0ABX5_1full260_1G|FLGG_ECOLI|Flagellar basal-body rod protein FlgG_P1
FLGH_ECOLI	signal-peptide	1	21	2225.2	0	Unmodified	P0A6S0_1frag21_1G_P1_1T	2225.2	1	P0A6S0_1frag21_1G|FLGH_ECOLI|Flagellar L-ring protein_P1
FLGH_ECOLI	chain	22	232	22490.3	0	Unmodified	P0A6S0_22frag232_1G_P1_1T	22490.3	4	P0A6S0_22frag232_1G|FLGH_ECOLI|Flagellar L-ring protein_P1
FLGH_ECOLI	full	1	232	24697.5	0	Unmodified	P0A6S0_1full232_1G_P1_1T	24697.5	5	P0A6S0_1full232_1G|FLGH_ECOLI|Flagellar L-ring protein_P1
FLGI_ECOLI	signal-peptide	1	19	2024.22	0	Unmodified	P0A6S3_1frag19_1G_P1_1T	2024.22	1	P0A6S3_1frag19_1G|FLGI_ECOLI|Flagellar P-ring protein_P1
FLGI_ECOLI	chain	20	365	36301.7	0	Unmodified	P0A6S3_20frag365_1G_P1_1T	36301.7	5	P0A6S3_20frag365_1G|FLGI_ECOLI|Flagellar P-ring protein_P1
FLGI_ECOLI	full	1	365	38307.9	0	Unmodified	P0A6S3_1full365_1G_P1_1T	38307.9	6	P0A6S3_1full365_1G|FLGI_ECOLI|Flagellar P-ring protein_P1
FLGJ_ECOLI	full	1	313	34613.6	0	Unmodified	P75942_1full313_1G_P1_1T	34613.6	20	P75942_1full313_1G|FLGJ_ECOLI|Peptidoglycan hydrolase FlgJ_P1
FLGK_ECOLI	chain	2	547	57907.9	0	Unmodified	P33235_2frag547_1G_P1_1T	57907.9	18	P33235_2frag547_1G|FLGK_ECOLI|Flagellar hook-associated protein 1_P1
FLGK_ECOLI	full	1	547	58039	0	Unmodified	P33235_1full547_1G_P1_1T	58039	18	P33235_1full547_1G|FLGK_ECOLI|Flagellar hook-associated protein 1_P1
FLGL_ECOLI	full	1	317	34380.1	0	Unmodified	P29744_1full317_1G_P1_1T	34380.1	15	P29744_1full317_1G|FLGL_ECOLI|Flagellar hook-associated protein 3_P1
FLGM_ECOLI	full	1	97	10382.4	0	Unmodified	P0AEM4_1full97_1G_P1_1T	10382.4	6	P0AEM4_1full97_1G|FLGM_ECOLI|Negative regulator of flagellin synthesis_P1
FLGN_ECOLI	full	1	138	15913.1	0	Unmodified	P43533_1full138_1G_P1_1T	15913.1	7	P43533_1full138_1G|FLGN_ECOLI|Flagella synthesis protein FlgN_P1
FLHA_ECOLI	full	1	692	74947.4	0	Unmodified	P76298_1full692_1G_P1_1T	74947.4	19	P76298_1full692_1G|FLHA_ECOLI|Flagellar biosynthesis protein FlhA_P1
FLHB_ECOLI	full	1	382	42412	0	Unmodified	P76299_1full382_1G_P1_1T	42412	18	P76299_1full382_1G|FLHB_ECOLI|Flagellar biosynthetic protein FlhB_P1
FLHC_ECOLI	full	1	192	22072.3	0	Unmodified	P0ABY7_1full192_1G_P1_1T	22072.3	8	P0ABY7_1full192_1G|FLHC_ECOLI|Flagellar transcriptional regulator FlhC_P1
FLHD_ECOLI	full	1	116	13405	0	Unmodified	P0A8S9_1full116_1G_P1_1T	13405	5	P0A8S9_1full116_1G|FLHD_ECOLI|Flagellar transcriptional regulator FlhD_P1
FLHE_ECOLI	signal-peptide	1	16	1811.11	0	Unmodified	P76297_1frag16_1G_P1_1T	1811.11	0	P76297_1frag16_1G|FLHE_ECOLI|Flagellar protein FlhE_P1
FLHE_ECOLI	chain	17	130	12379.4	0	Unmodified	P76297_17frag130_1G_P1_1T	12379.4	1	P76297_17frag130_1G|FLHE_ECOLI|Flagellar protein FlhE_P1
FLHE_ECOLI	full	1	130	14172.5	0	Unmodified	P76297_1full130_1G_P1_1T	14172.5	1	P76297_1full130_1G|FLHE_ECOLI|Flagellar protein FlhE_P1
FLIA_ECOLI	full	1	239	27552.4	0	Unmodified	P0AEM6_1full239_1G_P1_1T	27552.4	6	P0AEM6_1full239_1G|FLIA_ECOLI|RNA polymerase sigma factor FliA_P1
FLIC_ECOLI	chain	2	498	51333.9	0	Unmodified	P04949_2frag498_1G_P1_1T	51333.9	25	P04949_2frag498_1G|FLIC_ECOLI|Flagellin_P1
FLIC_ECOLI	full	1	498	51464.9	0	Unmodified	P04949_1full498_1G_P1_1T	51464.9	25	P04949_1full498_1G|FLIC_ECOLI|Flagellin_P1
FLID_ECOLI	chain	2	468	48504.7	0	Unmodified	P24216_2frag468_1G_P1_1T	48504.7	26	P24216_2frag468_1G|FLID_ECOLI|Flagellar hook-associated protein 2_P1
FLID_ECOLI	full	1	468	48635.7	0	Unmodified	P24216_1full468_1G_P1_1T	48635.7	26	P24216_1full468_1G|FLID_ECOLI|Flagellar hook-associated protein 2_P1
FLIE_ECOLI	chain	2	104	11012.6	0	Unmodified	P0A8T5_2frag104_1G_P1_1T	11012.6	3	P0A8T5_2frag104_1G|FLIE_ECOLI|Flagellar hook-basal body complex protein FliE_P1
FLIE_ECOLI	full	1	104	11143.6	0	Unmodified	P0A8T5_1full104_1G_P1_1T	11143.6	3	P0A8T5_1full104_1G|FLIE_ECOLI|Flagellar hook-basal body complex protein FliE_P1
FLIF_ECOLI	full	1	552	60704.5	0	Unmodified	P25798_1full552_1G_P1_1T	60704.5	19	P25798_1full552_1G|FLIF_ECOLI|Flagellar M-ring protein_P1
FLIG_ECOLI	full	1	331	36849.4	0	Unmodified	P0ABZ1_1full331_1G_P1_1T	36849.4	12	P0ABZ1_1full331_1G|FLIG_ECOLI|Flagellar motor switch protein FliG_P1
FLIH_ECOLI	full	1	228	25196.7	0	Unmodified	P31068_1full228_1G_P1_1T	25196.7	6	P31068_1full228_1G|FLIH_ECOLI|Flagellar assembly protein FliH_P1
FLII_ECOLI	full	1	457	49430.1	0	Unmodified	P52612_1full457_1G_P1_1T	49430.1	11	P52612_1full457_1G|FLII_ECOLI|Flagellum-specific ATP synthase_P1
FLIJ_ECOLI	full	1	147	17432.9	0	Unmodified	P52613_1full147_1G_P1_1T	17432.9	10	P52613_1full147_1G|FLIJ_ECOLI|Flagellar FliJ protein_P1
FLIK_ECOLI	full	1	375	39384.2	0	Unmodified	P52614_1full375_1G_P1_1T	39384.2	12	P52614_1full375_1G|FLIK_ECOLI|Flagellar hook-length control protein_P1
FLIL_ECOLI	full	1	154	17339.4	0	Unmodified	P0ABX8_1full154_1G_P1_1T	17339.4	9	P0ABX8_1full154_1G|FLIL_ECOLI|Flagellar protein FliL_P1
FLIM_ECOLI	full	1	334	37954.9	0	Unmodified	P06974_1full334_1G_P1_1T	37954.9	9	P06974_1full334_1G|FLIM_ECOLI|Flagellar motor switch protein FliM_P1
FLIN_ECOLI	full	1	137	14885.7	0	Unmodified	P15070_1full137_1G_P1_1T	14885.7	5	P15070_1full137_1G|FLIN_ECOLI|Flagellar motor switch protein FliN_P1
FLIO_ECOLI	full	1	121	12710.1	0	Unmodified	P22586_1full121_1G_P1_1T	12710.1	6	P22586_1full121_1G|FLIO_ECOLI|Flagellar protein FliO_P1
FLIP_ECOLI	signal-peptide	1	21	2379.42	0	Unmodified	P0AC05_1frag21_1G_P1_1T	2379.42	0	P0AC05_1frag21_1G|FLIP_ECOLI|Flagellar biosynthetic protein FliP_P1
FLIP_ECOLI	chain	22	245	24589.3	0	Unmodified	P0AC05_22frag245_1G_P1_1T	24589.3	5	P0AC05_22frag245_1G|FLIP_ECOLI|Flagellar biosynthetic protein FliP_P1
FLIP_ECOLI	full	1	245	26950.8	0	Unmodified	P0AC05_1full245_1G_P1_1T	26950.8	5	P0AC05_1full245_1G|FLIP_ECOLI|Flagellar biosynthetic protein FliP_P1
FLIQ_ECOLI	full	1	89	9641.38	0	Unmodified	P0AC07_1full89_1G_P1_1T	9641.38	2	P0AC07_1full89_1G|FLIQ_ECOLI|Flagellar biosynthetic protein FliQ_P1
FLIR_ECOLI	full	1	261	28604.7	0	Unmodified	P33135_1full261_1G_P1_1T	28604.7	3	P33135_1full261_1G|FLIR_ECOLI|Flagellar biosynthetic protein FliR_P1
FLIS_ECOLI	full	1	136	14980.7	0	Unmodified	P26608_1full136_1G_P1_1T	14980.7	5	P26608_1full136_1G|FLIS_ECOLI|Flagellar protein FliS_P1
FLIT_ECOLI	full	1	121	13860.1	0	Unmodified	P0ABY2_1full121_1G_P1_1T	13860.1	5	P0ABY2_1full121_1G|FLIT_ECOLI|Flagellar protein FliT_P1
FLIY_ECOLI	signal-peptide	1	29	3002.64	0	Unmodified	P0AEM9_1frag29_1G_P1_1T	3002.64	2	P0AEM9_1frag29_1G|FLIY_ECOLI|L-cystine-binding protein FliY_P1
FLIY_ECOLI	chain	30	266	26245	0	Unmodified	P0AEM9_30frag266_1G_P1_1T	26245	24	P0AEM9_30frag266_1G|FLIY_ECOLI|L-cystine-binding protein FliY_P1
FLIY_ECOLI	full	1	266	29229.6	0	Unmodified	P0AEM9_1full266_1G_P1_1T	29229.6	26	P0AEM9_1full266_1G|FLIY_ECOLI|L-cystine-binding protein FliY_P1
FLIZ_ECOLI	full	1	183	22074.4	0	Unmodified	P52627_1full183_1G_P1_1T	22074.4	11	P52627_1full183_1G|FLIZ_ECOLI|Regulator of sigma S factor FliZ_P1
FLK_ECOLI	full	1	331	36741.6	0	Unmodified	P15286_1full331_1G_P1_1T	36741.6	12	P15286_1full331_1G|FLK_ECOLI|Flagellar regulator flk_P1
FLXA_ECOLI	full	1	110	12296.4	0	Unmodified	P77609_1full110_1G_P1_1T	12296.4	12	P77609_1full110_1G|FLXA_ECOLI|Protein FlxA_P1
FMT_ECOLI	chain	2	315	34315.1	0	Unmodified	P23882_2frag315_1G_P1_1T	34315.1	16	P23882_2frag315_1G|FMT_ECOLI|Methionyl-tRNA formyltransferase_P1
FMT_ECOLI	full	1	315	34446.1	0	Unmodified	P23882_1full315_1G_P1_1T	34446.1	16	P23882_1full315_1G|FMT_ECOLI|Methionyl-tRNA formyltransferase_P1
FNR_ECOLI	full	1	250	28346.7	0	Unmodified	P0A9E5_1full250_1G_P1_1T	28346.7	14	P0A9E5_1full250_1G|FNR_ECOLI|Fumarate and nitrate reduction regulatory protein_P1
FOCA_ECOLI	full	1	285	31335.2	0	Unmodified	P0AC23_1full285_1G_P1_1T	31335.2	10	P0AC23_1full285_1G|FOCA_ECOLI|Probable formate transporter 1_P1
FOCB_ECOLI	full	1	282	31227.1	0	Unmodified	P77733_1full282_1G_P1_1T	31227.1	7	P77733_1full282_1G|FOCB_ECOLI|Probable formate transporter 2_P1
FOLB_ECOLI	full	1	122	13716.2	0	Unmodified	P0AC16_1full122_1G_P1_1T	13716.2	6	P0AC16_1full122_1G|FOLB_ECOLI|Dihydroneopterin aldolase_P1
FOLC_ECOLI	full	1	422	45676.7	0	Unmodified	P08192_1full422_1G_P1_1T	45676.7	16	P08192_1full422_1G|FOLC_ECOLI|Dihydrofolate synthase/folylpolyglutamate synthase_P1
FOLD_ECOLI	chain	2	288	31274.6	0	Unmodified	P24186_2frag288_1G_P1_1T	31274.6	12	P24186_2frag288_1G|FOLD_ECOLI|Bifunctional protein FolD_P1
FOLD_ECOLI	full	1	288	31405.6	0	Unmodified	P24186_1full288_1G_P1_1T	31405.6	12	P24186_1full288_1G|FOLD_ECOLI|Bifunctional protein FolD_P1
FOLM_ECOLI	full	1	240	26590.8	0	Unmodified	P0AFS3_1full240_1G_P1_1T	26590.8	11	P0AFS3_1full240_1G|FOLM_ECOLI|Dihydromonapterin reductase_P1
FOLX_ECOLI	chain	2	120	13990.4	0	Unmodified	P0AC19_2frag120_1G_P1_1T	13990.4	6	P0AC19_2frag120_1G|FOLX_ECOLI|Dihydroneopterin triphosphate 2'-epimerase_P1
FOLX_ECOLI	full	1	120	14121.5	0	Unmodified	P0AC19_1full120_1G_P1_1T	14121.5	6	P0AC19_1full120_1G|FOLX_ECOLI|Dihydroneopterin triphosphate 2'-epimerase_P1
FPG_ECOLI	chain	2	269	30610.2	0	Unmodified	P05523_2frag269_1G_P1_1T	30610.2	16	P05523_2frag269_1G|FPG_ECOLI|Formamidopyrimidine-DNA glycosylase_P1
FPG_ECOLI	full	1	269	30741.3	0	Unmodified	P05523_1full269_1G_P1_1T	30741.3	16	P05523_1full269_1G|FPG_ECOLI|Formamidopyrimidine-DNA glycosylase_P1
FRDA_ECOLI	chain	2	602	66585.2	0	Unmodified	P00363_2frag602_1G_P1_1T	66585.2	27	P00363_2frag602_1G|FRDA_ECOLI|Fumarate reductase flavoprotein subunit_P1
FRDA_ECOLI	full	1	602	66716.3	0	Unmodified	P00363_1full602_1G_P1_1T	66716.3	27	P00363_1full602_1G|FRDA_ECOLI|Fumarate reductase flavoprotein subunit_P1
FRDB_ECOLI	chain	2	244	27713.6	0	Unmodified	P0AC47_2frag244_1G_P1_1T	27713.6	14	P0AC47_2frag244_1G|FRDB_ECOLI|Fumarate reductase iron-sulfur subunit_P1
FRDB_ECOLI	full	1	244	27844.6	0	Unmodified	P0AC47_1full244_1G_P1_1T	27844.6	14	P0AC47_1full244_1G|FRDB_ECOLI|Fumarate reductase iron-sulfur subunit_P1
FRDC_ECOLI	full	1	131	15085.4	0	Unmodified	P0A8Q0_1full131_1G_P1_1T	15085.4	10	P0A8Q0_1full131_1G|FRDC_ECOLI|Fumarate reductase subunit C_P1
FRDD_ECOLI	full	1	119	13179.2	0	Unmodified	P0A8Q3_1full119_1G_P1_1T	13179.2	3	P0A8Q3_1full119_1G|FRDD_ECOLI|Fumarate reductase subunit D_P1
FRE_ECOLI	chain	2	233	26321.5	0	Unmodified	P0AEN1_2frag233_1G_P1_1T	26321.5	7	P0AEN1_2frag233_1G|FRE_ECOLI|NAD(P)H-flavin reductase_P1
FRE_ECOLI	full	1	233	26452.5	0	Unmodified	P0AEN1_1full233_1G_P1_1T	26452.5	7	P0AEN1_1full233_1G|FRE_ECOLI|NAD(P)H-flavin reductase_P1
FRLA_ECOLI	full	1	445	48129.6	0	Unmodified	P45539_1full445_1G_P1_1T	48129.6	16	P45539_1full445_1G|FRLA_ECOLI|Putative fructoselysine transporter FrlA_P1
FRLB_ECOLI	full	1	340	39112.8	0	Unmodified	P0AC00_1full340_1G_P1_1T	39112.8	14	P0AC00_1full340_1G|FRLB_ECOLI|Fructoselysine 6-phosphate deglycase_P1
FRLC_ECOLI	full	1	276	31505.5	0	Unmodified	P45541_1full276_1G_P1_1T	31505.5	9	P45541_1full276_1G|FRLC_ECOLI|Protein FrlC_P1
FRLD_ECOLI	full	1	261	28679	0	Unmodified	P45543_1full261_1G_P1_1T	28679	10	P45543_1full261_1G|FRLD_ECOLI|Fructoselysine 6-kinase_P1
FRLR_ECOLI	full	1	243	28208.6	0	Unmodified	P45544_1full243_1G_P1_1T	28208.6	15	P45544_1full243_1G|FRLR_ECOLI|HTH-type transcriptional regulator FrlR_P1
FRMA_ECOLI	full	1	369	40064.4	0	Unmodified	P25437_1full369_1G_P1_1T	40064.4	20	P25437_1full369_1G|FRMA_ECOLI|S-(hydroxymethyl)glutathione dehydrogenase_P1
FRMR_ECOLI	full	1	91	10457.4	0	Unmodified	P0AAP3_1full91_1G_P1_1T	10457.4	4	P0AAP3_1full91_1G|FRMR_ECOLI|Transcriptional repressor FrmR_P1
FRSA_ECOLI	full	1	414	47448.9	0	Unmodified	P04335_1full414_1G_P1_1T	47448.9	16	P04335_1full414_1G|FRSA_ECOLI|Esterase FrsA_P1
FRVR_ECOLI	full	1	582	66633	0	Unmodified	P32152_1full582_1G_P1_1T	66633	13	P32152_1full582_1G|FRVR_ECOLI|Putative frv operon regulatory protein_P1
FRVX_ECOLI	full	1	356	39203.1	0	Unmodified	P32153_1full356_1G_P1_1T	39203.1	19	P32153_1full356_1G|FRVX_ECOLI|Putative aminopeptidase FrvX_P1
FSAA_ECOLI	full	1	220	23184.4	0	Unmodified	P78055_1full220_1G_P1_1T	23184.4	11	P78055_1full220_1G|FSAA_ECOLI|Fructose-6-phosphate aldolase 1_P1
FSAB_ECOLI	full	1	220	23734.5	0	Unmodified	P32669_1full220_1G_P1_1T	23734.5	10	P32669_1full220_1G|FSAB_ECOLI|Fructose-6-phosphate aldolase 2_P1
FSR_ECOLI	full	1	406	43495.5	0	Unmodified	P52067_1full406_1G_P1_1T	43495.5	13	P52067_1full406_1G|FSR_ECOLI|Fosmidomycin resistance protein_P1
FTNA_ECOLI	full	1	165	19540.5	0	Unmodified	P0A998_1full165_1G_P1_1T	19540.5	9	P0A998_1full165_1G|FTNA_ECOLI|Bacterial non-heme ferritin_P1
FTNB_ECOLI	full	1	167	19060.5	0	Unmodified	P0A9A2_1full167_1G_P1_1T	19060.5	8	P0A9A2_1full167_1G|FTNB_ECOLI|Bacterial non-heme ferritin-like protein_P1
FTSA_ECOLI	full	1	420	45983	0	Unmodified	P0ABH0_1full420_1G_P1_1T	45983	21	P0ABH0_1full420_1G|FTSA_ECOLI|Cell division protein FtsA_P1
FTSB_ECOLI	full	1	103	11655	0	Unmodified	P0A6S5_1full103_1G_P1_1T	11655	5	P0A6S5_1full103_1G|FTSB_ECOLI|Cell division protein FtsB_P1
FTSE_ECOLI	full	1	222	24553	0	Unmodified	P0A9R7_1full222_1G_P1_1T	24553	9	P0A9R7_1full222_1G|FTSE_ECOLI|Cell division ATP-binding protein FtsE_P1
FTSH_ECOLI	full	1	644	71074	0	Unmodified	P0AAI3_1full644_1G_P1_1T	71074	37	P0AAI3_1full644_1G|FTSH_ECOLI|ATP-dependent zinc metalloprotease FtsH_P1
FTSI_ECOLI	propeptide	578	588	1074.51	0	Unmodified	P0AD68_578frag588_1G_P1_1T	1074.51	0	P0AD68_578frag588_1G|FTSI_ECOLI|Peptidoglycan D,D-transpeptidase FtsI_P1
FTSI_ECOLI	chain	1	577	63151.5	0	Unmodified	P0AD68_1frag577_1G_P1_1T	63151.5	32	P0AD68_1frag577_1G|FTSI_ECOLI|Peptidoglycan D,D-transpeptidase FtsI_P1
FTSI_ECOLI	full	1	588	64208	0	Unmodified	P0AD68_1full588_1G_P1_1T	64208	32	P0AD68_1full588_1G|FTSI_ECOLI|Peptidoglycan D,D-transpeptidase FtsI_P1
FTSK_ECOLI	full	1	1329	147160	0	Unmodified	P46889_1full1329_1G_P1_1T	147160	45	P46889_1full1329_1G|FTSK_ECOLI|DNA translocase FtsK_P1
FTSL_ECOLI	full	1	121	13772.4	0	Unmodified	P0AEN4_1full121_1G_P1_1T	13772.4	5	P0AEN4_1full121_1G|FTSL_ECOLI|Cell division protein FtsL_P1
FTSN_ECOLI	full	1	319	36037.7	0	Unmodified	P29131_1full319_1G_P1_1T	36037.7	19	P29131_1full319_1G|FTSN_ECOLI|Cell division protein FtsN_P1
FTSP_ECOLI	signal-peptide	1	27	2810.51	0	Unmodified	P26648_1frag27_1G_P1_1T	2810.51	1	P26648_1frag27_1G|FTSP_ECOLI|Cell division protein FtsP_P1
FTSP_ECOLI	chain	28	470	49203.1	0	Unmodified	P26648_28frag470_1G_P1_1T	49203.1	6	P26648_28frag470_1G|FTSP_ECOLI|Cell division protein FtsP_P1
FTSP_ECOLI	full	1	470	51995.6	0	Unmodified	P26648_1full470_1G_P1_1T	51995.6	7	P26648_1full470_1G|FTSP_ECOLI|Cell division protein FtsP_P1
FTSQ_ECOLI	full	1	276	31494.3	0	Unmodified	P06136_1full276_1G_P1_1T	31494.3	10	P06136_1full276_1G|FTSQ_ECOLI|Cell division protein FtsQ_P1
FTSW_ECOLI	full	1	414	46175.1	0	Unmodified	P0ABG4_1full414_1G_P1_1T	46175.1	13	P0ABG4_1full414_1G|FTSW_ECOLI|Probable peptidoglycan glycosyltransferase FtsW_P1
FTSX_ECOLI	full	1	352	38802.6	0	Unmodified	P0AC30_1full352_1G_P1_1T	38802.6	14	P0AC30_1full352_1G|FTSX_ECOLI|Cell division protein FtsX_P1
FTSY_ECOLI	chain	2	497	54613.3	0	Unmodified	P10121_2frag497_1G_P1_1T	54613.3	33	P10121_2frag497_1G|FTSY_ECOLI|Signal recognition particle receptor FtsY_P1
FTSY_ECOLI	full	1	497	54744.4	0	Unmodified	P10121_1full497_1G_P1_1T	54744.4	33	P10121_1full497_1G|FTSY_ECOLI|Signal recognition particle receptor FtsY_P1
FTSZ_ECOLI	full	1	383	40434.8	0	Unmodified	P0A9A6_1full383_1G_P1_1T	40434.8	17	P0A9A6_1full383_1G|FTSZ_ECOLI|Cell division protein FtsZ_P1
FUCA_ECOLI	full	1	215	24060.5	0	Unmodified	P0AB87_1full215_1G_P1_1T	24060.5	9	P0AB87_1full215_1G|FUCA_ECOLI|L-fuculose phosphate aldolase_P1
FUCI_ECOLI	full	1	591	65819.5	0	Unmodified	P69922_1full591_1G_P1_1T	65819.5	25	P69922_1full591_1G|FUCI_ECOLI|L-fucose isomerase_P1
FUCK_ECOLI	full	1	482	53754.3	0	Unmodified	P11553_1full482_1G_P1_1T	53754.3	12	P11553_1full482_1G|FUCK_ECOLI|L-fuculokinase_P1
FUCM_ECOLI	full	1	140	15568.3	0	Unmodified	P0AEN8_1full140_1G_P1_1T	15568.3	6	P0AEN8_1full140_1G|FUCM_ECOLI|L-fucose mutarotase_P1
FUCO_ECOLI	full	1	382	40844	0	Unmodified	P0A9S1_1full382_1G_P1_1T	40844	16	P0A9S1_1full382_1G|FUCO_ECOLI|Lactaldehyde reductase_P1
FUCP_ECOLI	chain	2	438	47927.1	0	Unmodified	P11551_2frag438_1G_P1_1T	47927.1	11	P11551_2frag438_1G|FUCP_ECOLI|L-fucose-proton symporter_P1
FUCP_ECOLI	full	1	438	48058.2	0	Unmodified	P11551_1full438_1G_P1_1T	48058.2	11	P11551_1full438_1G|FUCP_ECOLI|L-fucose-proton symporter_P1
FUCR_ECOLI	full	1	243	27685.5	0	Unmodified	P0ACK8_1full243_1G_P1_1T	27685.5	14	P0ACK8_1full243_1G|FUCR_ECOLI|L-fucose operon activator_P1
FUMA_ECOLI	chain	2	548	60947.3	0	Unmodified	P0AC33_2frag548_1G_P1_1T	60947.3	38	P0AC33_2frag548_1G|FUMA_ECOLI|Fumarate hydratase class I, aerobic_P1
FUMA_ECOLI	full	1	548	61078.3	0	Unmodified	P0AC33_1full548_1G_P1_1T	61078.3	38	P0AC33_1full548_1G|FUMA_ECOLI|Fumarate hydratase class I, aerobic_P1
FUMB_ECOLI	full	1	548	60885.1	0	Unmodified	P14407_1full548_1G_P1_1T	60885.1	38	P14407_1full548_1G|FUMB_ECOLI|Fumarate hydratase class I, anaerobic_P1
FUMC_ECOLI	full	1	467	51048.2	0	Unmodified	P05042_1full467_1G_P1_1T	51048.2	24	P05042_1full467_1G|FUMC_ECOLI|Fumarate hydratase class II_P1
FUR_ECOLI	chain	2	148	16953.5	0	Unmodified	P0A9A9_2frag148_1G_P1_1T	16953.5	9	P0A9A9_2frag148_1G|FUR_ECOLI|Ferric uptake regulation protein_P1
FUR_ECOLI	full	1	148	17084.6	0	Unmodified	P0A9A9_1full148_1G_P1_1T	17084.6	9	P0A9A9_1full148_1G|FUR_ECOLI|Ferric uptake regulation protein_P1
FXSA_ECOLI	full	1	158	17736.6	0	Unmodified	P37147_1full158_1G_P1_1T	17736.6	7	P37147_1full158_1G|FXSA_ECOLI|UPF0716 protein FxsA_P1
G3P1_ECOLI	chain	2	331	35766.6	0	Unmodified	P0A9B2_2frag331_1G_P1_1T	35766.6	27	P0A9B2_2frag331_1G|G3P1_ECOLI|Glyceraldehyde-3-phosphate dehydrogenase A_P1
G3P1_ECOLI	full	1	331	35897.7	0	Unmodified	P0A9B2_1full331_1G_P1_1T	35897.7	27	P0A9B2_1full331_1G|G3P1_ECOLI|Glyceraldehyde-3-phosphate dehydrogenase A_P1
G3P2_ECOLI	full	1	333	35998.9	0	Unmodified	P33898_1full333_1G_P1_1T	35998.9	25	P33898_1full333_1G|G3P2_ECOLI|Putative glyceraldehyde-3-phosphate dehydrogenase C_P1
G6PD_ECOLI	full	1	491	56251.9	0	Unmodified	P0AC53_1full491_1G_P1_1T	56251.9	30	P0AC53_1full491_1G|G6PD_ECOLI|Glucose-6-phosphate 1-dehydrogenase_P1
G6PI_ECOLI	full	1	549	61893.6	0	Unmodified	P0A6T1_1full549_1G_P1_1T	61893.6	36	P0A6T1_1full549_1G|G6PI_ECOLI|Glucose-6-phosphate isomerase_P1
GABD_ECOLI	full	1	482	52262.2	0	Unmodified	P25526_1full482_1G_P1_1T	52262.2	29	P25526_1full482_1G|GABD_ECOLI|Succinate-semialdehyde dehydrogenase [NADP(+)] GabD_P1
GABP_ECOLI	full	1	466	51451.7	0	Unmodified	P25527_1full466_1G_P1_1T	51451.7	15	P25527_1full466_1G|GABP_ECOLI|GABA permease_P1
GABT_ECOLI	full	1	426	46370	0	Unmodified	P22256_1full426_1G_P1_1T	46370	21	P22256_1full426_1G|GABT_ECOLI|4-aminobutyrate aminotransferase GabT_P1
GADC_ECOLI	full	1	511	55371.9	0	Unmodified	P63235_1full511_1G_P1_1T	55371.9	20	P63235_1full511_1G|GADC_ECOLI|Probable glutamate/gamma-aminobutyrate antiporter_P1
GADE_ECOLI	full	1	175	20827.5	0	Unmodified	P63204_1full175_1G_P1_1T	20827.5	23	P63204_1full175_1G|GADE_ECOLI|Transcriptional regulator GadE_P1
GADW_ECOLI	full	1	242	28448.7	0	Unmodified	P63201_1full242_1G_P1_1T	28448.7	12	P63201_1full242_1G|GADW_ECOLI|HTH-type transcriptional regulator GadW_P1
GADX_ECOLI	full	1	274	31972.6	0	Unmodified	P37639_1full274_1G_P1_1T	31972.6	11	P37639_1full274_1G|GADX_ECOLI|HTH-type transcriptional regulator GadX_P1
GAL1_ECOLI	chain	2	382	41926.2	0	Unmodified	P0A6T3_2frag382_1G_P1_1T	41926.2	16	P0A6T3_2frag382_1G|GAL1_ECOLI|Galactokinase_P1
GAL1_ECOLI	full	1	382	42057.3	0	Unmodified	P0A6T3_1full382_1G_P1_1T	42057.3	16	P0A6T3_1full382_1G|GAL1_ECOLI|Galactokinase_P1
GAL7_ECOLI	full	1	348	40066.8	0	Unmodified	P09148_1full348_1G_P1_1T	40066.8	13	P09148_1full348_1G|GAL7_ECOLI|Galactose-1-phosphate uridylyltransferase_P1
GALE_ECOLI	full	1	338	37524.9	0	Unmodified	P09147_1full338_1G_P1_1T	37524.9	14	P09147_1full338_1G|GALE_ECOLI|UDP-glucose 4-epimerase_P1
GALF_ECOLI	full	1	297	33139.5	0	Unmodified	P0AAB6_1full297_1G_P1_1T	33139.5	20	P0AAB6_1full297_1G|GALF_ECOLI|UTP--glucose-1-phosphate uridylyltransferase_P1
GALM_ECOLI	full	1	346	38491	0	Unmodified	P0A9C3_1full346_1G_P1_1T	38491	12	P0A9C3_1full346_1G|GALM_ECOLI|Aldose 1-epimerase_P1
GALP_ECOLI	full	1	464	51256.3	0	Unmodified	P0AEP1_1full464_1G_P1_1T	51256.3	17	P0AEP1_1full464_1G|GALP_ECOLI|Galactose-proton symporter_P1
GALR_ECOLI	full	1	343	37346.9	0	Unmodified	P03024_1full343_1G_P1_1T	37346.9	6	P03024_1full343_1G|GALR_ECOLI|HTH-type transcriptional regulator GalR_P1
GALS_ECOLI	full	1	346	37633.2	0	Unmodified	P25748_1full346_1G_P1_1T	37633.2	9	P25748_1full346_1G|GALS_ECOLI|HTH-type transcriptional regulator GalS_P1
GALU_ECOLI	chain	2	302	33243.4	0	Unmodified	P0AEP3_2frag302_1G_P1_1T	33243.4	21	P0AEP3_2frag302_1G|GALU_ECOLI|UTP--glucose-1-phosphate uridylyltransferase_P1
GALU_ECOLI	full	1	302	33374.4	0	Unmodified	P0AEP3_1full302_1G_P1_1T	33374.4	21	P0AEP3_1full302_1G|GALU_ECOLI|UTP--glucose-1-phosphate uridylyltransferase_P1
GARD_ECOLI	full	1	523	56949.6	0	Unmodified	P39829_1full523_1G_P1_1T	56949.6	23	P39829_1full523_1G|GARD_ECOLI|Galactarate dehydratase (L-threo-forming)_P1
GARL_ECOLI	full	1	256	27520.4	0	Unmodified	P23522_1full256_1G_P1_1T	27520.4	12	P23522_1full256_1G|GARL_ECOLI|5-keto-4-deoxy-D-glucarate aldolase_P1
GARP_ECOLI	full	1	444	49438.1	0	Unmodified	P0AA80_1full444_1G_P1_1T	49438.1	22	P0AA80_1full444_1G|GARP_ECOLI|Probable galactarate transporter_P1
GARR_ECOLI	full	1	294	30682.2	0	Unmodified	P0ABQ2_1full294_1G_P1_1T	30682.2	20	P0ABQ2_1full294_1G|GARR_ECOLI|2-hydroxy-3-oxopropionate reductase_P1
GATD_ECOLI	full	1	346	37950.7	0	Unmodified	P0A9S3_1full346_1G_P1_1T	37950.7	16	P0A9S3_1full346_1G|GATD_ECOLI|Galactitol-1-phosphate 5-dehydrogenase_P1
GATR_ECOLI	full	1	259	28118.8	0	Unmodified	P36930_1full259_1G_P1_1T	28118.8	15	P36930_1full259_1G|GATR_ECOLI|Galactitol utilization operon repressor_P1
GATY_ECOLI	full	1	284	31116.8	0	Unmodified	P0C8J6_1full284_1G_P1_1T	31116.8	12	P0C8J6_1full284_1G|GATY_ECOLI|D-tagatose-1,6-bisphosphate aldolase subunit GatY_P1
GATZ_ECOLI	full	1	420	47647.2	0	Unmodified	P0C8J8_1full420_1G_P1_1T	47647.2	14	P0C8J8_1full420_1G|GATZ_ECOLI|D-tagatose-1,6-bisphosphate aldolase subunit GatZ_P1
GCH1_ECOLI	chain	2	222	24886.1	0	Unmodified	P0A6T5_2frag222_1G_P1_1T	24886.1	11	P0A6T5_2frag222_1G|GCH1_ECOLI|GTP cyclohydrolase 1_P1
GCH1_ECOLI	full	1	222	25017.1	0	Unmodified	P0A6T5_1full222_1G_P1_1T	25017.1	11	P0A6T5_1full222_1G|GCH1_ECOLI|GTP cyclohydrolase 1_P1
GCH1L_ECOLI	full	1	247	27053.9	0	Unmodified	P0AFP6_1full247_1G_P1_1T	27053.9	8	P0AFP6_1full247_1G|GCH1L_ECOLI|GTP cyclohydrolase 1 type 2 homolog_P1
GCL_ECOLI	chain	2	593	65427.4	0	Unmodified	P0AEP7_2frag593_1G_P1_1T	65427.4	23	P0AEP7_2frag593_1G|GCL_ECOLI|Glyoxylate carboligase_P1
GCL_ECOLI	full	1	593	65558.5	0	Unmodified	P0AEP7_1full593_1G_P1_1T	65558.5	23	P0AEP7_1full593_1G|GCL_ECOLI|Glyoxylate carboligase_P1
GCS2_ECOLI	full	1	372	42165	0	Unmodified	P77213_1full372_1G_P1_1T	42165	13	P77213_1full372_1G|GCS2_ECOLI|Putative glutamate--cysteine ligase 2_P1
GCSH_ECOLI	chain	2	129	13776.7	0	Unmodified	P0A6T9_2frag129_1G_P1_1T	13776.7	6	P0A6T9_2frag129_1G|GCSH_ECOLI|Glycine cleavage system H protein_P1
GCSH_ECOLI	full	1	129	13907.8	0	Unmodified	P0A6T9_1full129_1G_P1_1T	13907.8	6	P0A6T9_1full129_1G|GCSH_ECOLI|Glycine cleavage system H protein_P1
GCSP_ECOLI	chain	2	957	105192	0	Unmodified	P33195_2frag957_1G_P1_1T	105192	34	P33195_2frag957_1G|GCSP_ECOLI|Glycine dehydrogenase (decarboxylating)_P1
GCSP_ECOLI	full	1	957	105324	0	Unmodified	P33195_1full957_1G_P1_1T	105324	34	P33195_1full957_1G|GCSP_ECOLI|Glycine dehydrogenase (decarboxylating)_P1
GCST_ECOLI	chain	2	364	40208.4	0	Unmodified	P27248_2frag364_1G_P1_1T	40208.4	13	P27248_2frag364_1G|GCST_ECOLI|Aminomethyltransferase_P1
GCST_ECOLI	full	1	364	40339.4	0	Unmodified	P27248_1full364_1G_P1_1T	40339.4	13	P27248_1full364_1G|GCST_ECOLI|Aminomethyltransferase_P1
GCVA_ECOLI	full	1	305	34671.4	0	Unmodified	P0A9F6_1full305_1G_P1_1T	34671.4	15	P0A9F6_1full305_1G|GCVA_ECOLI|Glycine cleavage system transcriptional activator_P1
GCVR_ECOLI	chain	2	190	20827.6	0	Unmodified	P0A9I3_2frag190_1G_P1_1T	20827.6	4	P0A9I3_2frag190_1G|GCVR_ECOLI|Glycine cleavage system transcriptional repressor_P1
GCVR_ECOLI	full	1	190	20958.6	0	Unmodified	P0A9I3_1full190_1G_P1_1T	20958.6	4	P0A9I3_1full190_1G|GCVR_ECOLI|Glycine cleavage system transcriptional repressor_P1
GFCA_ECOLI	signal-peptide	1	21	2308.25	0	Unmodified	P75885_1frag21_1G_P1_1T	2308.25	2	P75885_1frag21_1G|GFCA_ECOLI|Threonine-rich inner membrane protein GfcA_P1
GFCA_ECOLI	chain	22	101	7227.49	0	Unmodified	P75885_22frag101_1G_P1_1T	7227.49	0	P75885_22frag101_1G|GFCA_ECOLI|Threonine-rich inner membrane protein GfcA_P1
GFCA_ECOLI	full	1	101	9517.73	0	Unmodified	P75885_1full101_1G_P1_1T	9517.73	2	P75885_1full101_1G|GFCA_ECOLI|Threonine-rich inner membrane protein GfcA_P1
GFCB_ECOLI	signal-peptide	1	15	1660.97	0	Unmodified	P75884_1frag15_1G_P1_1T	1660.97	0	P75884_1frag15_1G|GFCB_ECOLI|Uncharacterized lipoprotein GfcB_P1
GFCB_ECOLI	chain	16	214	22771.5	0	Unmodified	P75884_16frag214_1G_P1_1T	22771.5	6	P75884_16frag214_1G|GFCB_ECOLI|Uncharacterized lipoprotein GfcB_P1
GFCB_ECOLI	full	1	214	24414.4	0	Unmodified	P75884_1full214_1G_P1_1T	24414.4	6	P75884_1full214_1G|GFCB_ECOLI|Uncharacterized lipoprotein GfcB_P1
GFCC_ECOLI	signal-peptide	1	22	2538.29	0	Unmodified	P75883_1frag22_1G_P1_1T	2538.29	1	P75883_1frag22_1G|GFCC_ECOLI|Uncharacterized protein GfcC_P1
GFCC_ECOLI	chain	23	248	24831.1	0	Unmodified	P75883_23frag248_1G_P1_1T	24831.1	8	P75883_23frag248_1G|GFCC_ECOLI|Uncharacterized protein GfcC_P1
GFCC_ECOLI	full	1	248	27351.3	0	Unmodified	P75883_1full248_1G_P1_1T	27351.3	9	P75883_1full248_1G|GFCC_ECOLI|Uncharacterized protein GfcC_P1
GFCD_ECOLI	signal-peptide	1	18	1971.05	0	Unmodified	P75882_1frag18_1G_P1_1T	1971.05	2	P75882_1frag18_1G|GFCD_ECOLI|Uncharacterized lipoprotein GfcD_P1
GFCD_ECOLI	chain	19	698	77194.1	0	Unmodified	P75882_19frag698_1G_P1_1T	77194.1	26	P75882_19frag698_1G|GFCD_ECOLI|Uncharacterized lipoprotein GfcD_P1
GFCD_ECOLI	full	1	698	79147.1	0	Unmodified	P75882_1full698_1G_P1_1T	79147.1	28	P75882_1full698_1G|GFCD_ECOLI|Uncharacterized lipoprotein GfcD_P1
GFCE_ECOLI	signal-peptide	1	20	2247.35	0	Unmodified	P0A932_1frag20_1G_P1_1T	2247.35	3	P0A932_1frag20_1G|GFCE_ECOLI|Putative polysaccharide export protein GfcE_P1
GFCE_ECOLI	chain	21	379	39694.6	0	Unmodified	P0A932_21frag379_1G_P1_1T	39694.6	16	P0A932_21frag379_1G|GFCE_ECOLI|Putative polysaccharide export protein GfcE_P1
GFCE_ECOLI	full	1	379	41923.9	0	Unmodified	P0A932_1full379_1G_P1_1T	41923.9	19	P0A932_1full379_1G|GFCE_ECOLI|Putative polysaccharide export protein GfcE_P1
GGT_ECOLI	signal-peptide	1	25	2658.46	0	Unmodified	P18956_1frag25_1G_P1_1T	2658.46	1	P18956_1frag25_1G|GGT_ECOLI|Gamma-glutamyltranspeptidase_P1
GGT_ECOLI	chain	391	580	20078.3	0	Unmodified	P18956_391frag580_1G_P1_1T	20078.3	10	P18956_391frag580_1G|GGT_ECOLI|Gamma-glutamyltranspeptidase_P1
GGT_ECOLI	chain	26	390	39398.1	0	Unmodified	P18956_26frag390_1G_P1_1T	39398.1	28	P18956_26frag390_1G|GGT_ECOLI|Gamma-glutamyltranspeptidase_P1
GGT_ECOLI	full	1	580	62098.8	0	Unmodified	P18956_1full580_1G_P1_1T	62098.8	39	P18956_1full580_1G|GGT_ECOLI|Gamma-glutamyltranspeptidase_P1
GHOS_ECOLI	full	1	98	11549.7	0	Unmodified	P0AF61_1full98_1G_P1_1T	11549.7	4	P0AF61_1full98_1G|GHOS_ECOLI|Endoribonuclease GhoS_P1
GHOT_ECOLI	full	1	57	6566.72	0	Unmodified	P64646_1full57_1G_P1_1T	6566.72	2	P64646_1full57_1G|GHOT_ECOLI|Toxin GhoT_P1
GHRA_ECOLI	full	1	312	35572.4	0	Unmodified	P75913_1full312_1G_P1_1T	35572.4	10	P75913_1full312_1G|GHRA_ECOLI|Glyoxylate/hydroxypyruvate reductase A_P1
GHRB_ECOLI	full	1	324	35705.3	0	Unmodified	P37666_1full324_1G_P1_1T	35705.3	13	P37666_1full324_1G|GHRB_ECOLI|Glyoxylate/hydroxypyruvate reductase B_P1
GHXP_ECOLI	full	1	449	45933.1	0	Unmodified	P0AF52_1full449_1G_P1_1T	45933.1	10	P0AF52_1full449_1G|GHXP_ECOLI|Guanine/hypoxanthine permease GhxP_P1
GHXQ_ECOLI	full	1	455	47108.6	0	Unmodified	Q46817_1full455_1G_P1_1T	47108.6	12	Q46817_1full455_1G|GHXQ_ECOLI|Guanine/hypoxanthine permease GhxQ_P1
GLCA_ECOLI	full	1	560	59140	0	Unmodified	Q46839_1full560_1G_P1_1T	59140	18	Q46839_1full560_1G|GLCA_ECOLI|Glycolate permease GlcA_P1
GLCC_ECOLI	full	1	254	29108.5	0	Unmodified	P0ACL5_1full254_1G_P1_1T	29108.5	9	P0ACL5_1full254_1G|GLCC_ECOLI|Glc operon transcriptional activator_P1
GLCD_ECOLI	full	1	499	54460	0	Unmodified	P0AEP9_1full499_1G_P1_1T	54460	14	P0AEP9_1full499_1G|GLCD_ECOLI|Glycolate oxidase subunit GlcD_P1
GLCE_ECOLI	full	1	350	38799.7	0	Unmodified	P52073_1full350_1G_P1_1T	38799.7	8	P52073_1full350_1G|GLCE_ECOLI|Glycolate oxidase subunit GlcE_P1
GLCF_ECOLI	full	1	407	46211	0	Unmodified	P52074_1full407_1G_P1_1T	46211	20	P52074_1full407_1G|GLCF_ECOLI|Glycolate oxidase iron-sulfur subunit_P1
GLCG_ECOLI	full	1	134	13841.3	0	Unmodified	P0AEQ1_1full134_1G_P1_1T	13841.3	7	P0AEQ1_1full134_1G|GLCG_ECOLI|Protein GlcG_P1
GLDA_ECOLI	full	1	367	39191	0	Unmodified	P0A9S5_1full367_1G_P1_1T	39191	13	P0A9S5_1full367_1G|GLDA_ECOLI|Glycerol dehydrogenase_P1
GLF_ECOLI	full	1	367	43333.3	0	Unmodified	P37747_1full367_1G_P1_1T	43333.3	35	P37747_1full367_1G|GLF_ECOLI|UDP-galactopyranose mutase_P1
GLGA_ECOLI	full	1	477	53056.3	0	Unmodified	P0A6U8_1full477_1G_P1_1T	53056.3	12	P0A6U8_1full477_1G|GLGA_ECOLI|Glycogen synthase_P1
GLGB_ECOLI	full	1	728	84598.2	0	Unmodified	P07762_1full728_1G_P1_1T	84598.2	25	P07762_1full728_1G|GLGB_ECOLI|1,4-alpha-glucan branching enzyme GlgB_P1
GLGC_ECOLI	chain	2	431	49200.9	0	Unmodified	P0A6V1_2frag431_1G_P1_1T	49200.9	19	P0A6V1_2frag431_1G|GLGC_ECOLI|Glucose-1-phosphate adenylyltransferase_P1
GLGC_ECOLI	full	1	431	49332	0	Unmodified	P0A6V1_1full431_1G_P1_1T	49332	19	P0A6V1_1full431_1G|GLGC_ECOLI|Glucose-1-phosphate adenylyltransferase_P1
GLGS_ECOLI	full	1	66	8000.66	0	Unmodified	P26649_1full66_1G_P1_1T	8000.66	0	P26649_1full66_1G|GLGS_ECOLI|Surface composition regulator_P1
GLGX_ECOLI	full	1	657	74334.9	0	Unmodified	P15067_1full657_1G_P1_1T	74334.9	15	P15067_1full657_1G|GLGX_ECOLI|Glycogen debranching enzyme_P1
GLK_ECOLI	full	1	321	35171.3	0	Unmodified	P0A6V8_1full321_1G_P1_1T	35171.3	16	P0A6V8_1full321_1G|GLK_ECOLI|Glucokinase_P1
GLMM_ECOLI	chain	2	445	47843.9	0	Unmodified	P31120_2frag445_1G_P1_1T	47843.9	22	P31120_2frag445_1G|GLMM_ECOLI|Phosphoglucosamine mutase_P1
GLMM_ECOLI	full	1	445	47975	0	Unmodified	P31120_1full445_1G_P1_1T	47975	22	P31120_1full445_1G|GLMM_ECOLI|Phosphoglucosamine mutase_P1
GLMS_ECOLI	chain	2	609	67134	0	Unmodified	P17169_2frag609_1G_P1_1T	67134	23	P17169_2frag609_1G|GLMS_ECOLI|Glutamine--fructose-6-phosphate aminotransferase [isomerizing]_P1
GLMS_ECOLI	full	1	609	67265	0	Unmodified	P17169_1full609_1G_P1_1T	67265	23	P17169_1full609_1G|GLMS_ECOLI|Glutamine--fructose-6-phosphate aminotransferase [isomerizing]_P1
GLMU_ECOLI	full	1	456	49588	0	Unmodified	P0ACC7_1full456_1G_P1_1T	49588	25	P0ACC7_1full456_1G|GLMU_ECOLI|Bifunctional protein GlmU_P1
GLNA_ECOLI	chain	2	469	52160.1	0	Unmodified	P0A9C5_2frag469_1G_P1_1T	52160.1	24	P0A9C5_2frag469_1G|GLNA_ECOLI|Glutamine synthetase_P1
GLNA_ECOLI	full	1	469	52291.2	0	Unmodified	P0A9C5_1full469_1G_P1_1T	52291.2	24	P0A9C5_1full469_1G|GLNA_ECOLI|Glutamine synthetase_P1
GLNB_ECOLI	full	1	112	12554.8	0	Unmodified	P0A9Z1_1full112_1G_P1_1T	12554.8	10	P0A9Z1_1full112_1G|GLNB_ECOLI|Nitrogen regulatory protein P-II 1_P1
GLND_ECOLI	full	1	890	103015	0	Unmodified	P27249_1full890_1G_P1_1T	103015	22	P27249_1full890_1G|GLND_ECOLI|Bifunctional uridylyltransferase/uridylyl-removing enzyme_P1
GLNE_ECOLI	full	1	946	109048	0	Unmodified	P30870_1full946_1G_P1_1T	109048	23	P30870_1full946_1G|GLNE_ECOLI|Bifunctional glutamine synthetase adenylyltransferase/adenylyl-removing enzyme_P1
GLNH_ECOLI	signal-peptide	1	22	2259.3	0	Unmodified	P0AEQ3_1frag22_1G_P1_1T	2259.3	2	P0AEQ3_1frag22_1G|GLNH_ECOLI|Glutamine-binding periplasmic protein_P1
GLNH_ECOLI	chain	23	248	25164.3	0	Unmodified	P0AEQ3_23frag248_1G_P1_1T	25164.3	27	P0AEQ3_23frag248_1G|GLNH_ECOLI|Glutamine-binding periplasmic protein_P1
GLNH_ECOLI	full	1	248	27405.6	0	Unmodified	P0AEQ3_1full248_1G_P1_1T	27405.6	29	P0AEQ3_1full248_1G|GLNH_ECOLI|Glutamine-binding periplasmic protein_P1
GLNK_ECOLI	full	1	112	12331.8	0	Unmodified	P0AC55_1full112_1G_P1_1T	12331.8	10	P0AC55_1full112_1G|GLNK_ECOLI|Nitrogen regulatory protein P-II 2_P1
GLNP_ECOLI	full	1	219	24380.6	0	Unmodified	P0AEQ6_1full219_1G_P1_1T	24380.6	4	P0AEQ6_1full219_1G|GLNP_ECOLI|Glutamine transport system permease protein GlnP_P1
GLNQ_ECOLI	full	1	240	26891.4	0	Unmodified	P10346_1full240_1G_P1_1T	26891.4	15	P10346_1full240_1G|GLNQ_ECOLI|Glutamine transport ATP-binding protein GlnQ_P1
GLO2_ECOLI	full	1	251	28870.7	0	Unmodified	P0AC84_1full251_1G_P1_1T	28870.7	14	P0AC84_1full251_1G|GLO2_ECOLI|Hydroxyacylglutathione hydrolase GloB_P1
GLO22_ECOLI	full	1	215	24053.1	0	Unmodified	P75849_1full215_1G_P1_1T	24053.1	7	P75849_1full215_1G|GLO22_ECOLI|Hydroxyacylglutathione hydrolase GloC_P1
GLPA_ECOLI	full	1	542	59831.9	0	Unmodified	P0A9C0_1full542_1G_P1_1T	59831.9	14	P0A9C0_1full542_1G|GLPA_ECOLI|Anaerobic glycerol-3-phosphate dehydrogenase subunit A_P1
GLPB_ECOLI	full	1	419	45970.8	0	Unmodified	P13033_1full419_1G_P1_1T	45970.8	9	P13033_1full419_1G|GLPB_ECOLI|Anaerobic glycerol-3-phosphate dehydrogenase subunit B_P1
GLPC_ECOLI	full	1	396	45322.3	0	Unmodified	P0A996_1full396_1G_P1_1T	45322.3	27	P0A996_1full396_1G|GLPC_ECOLI|Anaerobic glycerol-3-phosphate dehydrogenase subunit C_P1
GLPD_ECOLI	full	1	501	57086.5	0	Unmodified	P13035_1full501_1G_P1_1T	57086.5	25	P13035_1full501_1G|GLPD_ECOLI|Aerobic glycerol-3-phosphate dehydrogenase_P1
GLPE_ECOLI	full	1	108	12212.7	0	Unmodified	P0A6V5_1full108_1G_P1_1T	12212.7	3	P0A6V5_1full108_1G|GLPE_ECOLI|Thiosulfate sulfurtransferase GlpE_P1
GLPF_ECOLI	full	1	281	30166.8	0	Unmodified	P0AER0_1full281_1G_P1_1T	30166.8	8	P0AER0_1full281_1G|GLPF_ECOLI|Glycerol uptake facilitator protein_P1
GLPG_ECOLI	full	1	276	31391.3	0	Unmodified	P09391_1full276_1G_P1_1T	31391.3	6	P09391_1full276_1G|GLPG_ECOLI|Rhomboid protease GlpG_P1
GLPK_ECOLI	chain	2	502	56525.6	0	Unmodified	P0A6F3_2frag502_1G_P1_1T	56525.6	22	P0A6F3_2frag502_1G|GLPK_ECOLI|Glycerol kinase_P1
GLPK_ECOLI	full	1	502	56656.7	0	Unmodified	P0A6F3_1full502_1G_P1_1T	56656.7	22	P0A6F3_1full502_1G|GLPK_ECOLI|Glycerol kinase_P1
GLPQ_ECOLI	signal-peptide	1	25	2675.36	0	Unmodified	P09394_1frag25_1G_P1_1T	2675.36	2	P09394_1frag25_1G|GLPQ_ECOLI|Glycerophosphodiester phosphodiesterase, periplasmic_P1
GLPQ_ECOLI	chain	26	358	38473.4	0	Unmodified	P09394_26frag358_1G_P1_1T	38473.4	30	P09394_26frag358_1G|GLPQ_ECOLI|Glycerophosphodiester phosphodiesterase, periplasmic_P1
GLPQ_ECOLI	full	1	358	41130.8	0	Unmodified	P09394_1full358_1G_P1_1T	41130.8	32	P09394_1full358_1G|GLPQ_ECOLI|Glycerophosphodiester phosphodiesterase, periplasmic_P1
GLPR_ECOLI	full	1	252	28151.6	0	Unmodified	P0ACL0_1full252_1G_P1_1T	28151.6	8	P0ACL0_1full252_1G|GLPR_ECOLI|Glycerol-3-phosphate regulon repressor_P1
GLPT_ECOLI	full	1	452	50804.1	0	Unmodified	P08194_1full452_1G_P1_1T	50804.1	16	P08194_1full452_1G|GLPT_ECOLI|Glycerol-3-phosphate transporter_P1
GLPX_ECOLI	full	1	336	36120.9	0	Unmodified	P0A9C9_1full336_1G_P1_1T	36120.9	15	P0A9C9_1full336_1G|GLPX_ECOLI|Fructose-1,6-bisphosphatase 1 class 2_P1
GLPX2_ECOLI	full	1	321	34755.7	0	Unmodified	P21437_1full321_1G_P1_1T	34755.7	14	P21437_1full321_1G|GLPX2_ECOLI|Fructose-1,6-bisphosphatase 2 class 2_P1
GLRK_ECOLI	full	1	475	53759	0	Unmodified	P52101_1full475_1G_P1_1T	53759	15	P52101_1full475_1G|GLRK_ECOLI|Sensor histidine kinase GlrK_P1
GLRR_ECOLI	full	1	444	49376.1	0	Unmodified	P0AFU4_1full444_1G_P1_1T	49376.1	18	P0AFU4_1full444_1G|GLRR_ECOLI|Transcriptional regulatory protein GlrR_P1
GLRX1_ECOLI	full	1	85	9840.9	0	Unmodified	P68688_1full85_1G_P1_1T	9840.9	6	P68688_1full85_1G|GLRX1_ECOLI|Glutaredoxin 1_P1
GLRX2_ECOLI	full	1	215	24593	0	Unmodified	P0AC59_1full215_1G_P1_1T	24593	18	P0AC59_1full215_1G|GLRX2_ECOLI|Glutaredoxin 2_P1
GLRX3_ECOLI	chain	2	83	9219.74	0	Unmodified	P0AC62_2frag83_1G_P1_1T	9219.74	6	P0AC62_2frag83_1G|GLRX3_ECOLI|Glutaredoxin 3_P1
GLRX3_ECOLI	full	1	83	9350.78	0	Unmodified	P0AC62_1full83_1G_P1_1T	9350.78	6	P0AC62_1full83_1G|GLRX3_ECOLI|Glutaredoxin 3_P1
GLRX4_ECOLI	full	1	115	13097.6	0	Unmodified	P0AC69_1full115_1G_P1_1T	13097.6	7	P0AC69_1full115_1G|GLRX4_ECOLI|Glutaredoxin 4_P1
GLSA1_ECOLI	full	1	310	33239.8	0	Unmodified	P77454_1full310_1G_P1_1T	33239.8	9	P77454_1full310_1G|GLSA1_ECOLI|Glutaminase 1_P1
GLSA2_ECOLI	full	1	308	33786.3	0	Unmodified	P0A6W0_1full308_1G_P1_1T	33786.3	8	P0A6W0_1full308_1G|GLSA2_ECOLI|Glutaminase 2_P1
GLTB_ECOLI	propeptide	1	11	1390.66	0	Unmodified	P09831_1frag11_1G_P1_1T	1390.66	1	P09831_1frag11_1G|GLTB_ECOLI|Glutamate synthase [NADPH] large chain_P1
GLTB_ECOLI	chain	12	1486	163507	0	Unmodified	P09831_12frag1486_1G_P1_1T	163507	67	P09831_12frag1486_1G|GLTB_ECOLI|Glutamate synthase [NADPH] large chain_P1
GLTB_ECOLI	full	1	1486	164880	0	Unmodified	P09831_1full1486_1G_P1_1T	164880	68	P09831_1full1486_1G|GLTB_ECOLI|Glutamate synthase [NADPH] large chain_P1
GLTD_ECOLI	chain	2	472	52686.6	0	Unmodified	P09832_2frag472_1G_P1_1T	52686.6	26	P09832_2frag472_1G|GLTD_ECOLI|Glutamate synthase [NADPH] small chain_P1
GLTD_ECOLI	full	1	472	52817.6	0	Unmodified	P09832_1full472_1G_P1_1T	52817.6	26	P09832_1full472_1G|GLTD_ECOLI|Glutamate synthase [NADPH] small chain_P1
GLTF_ECOLI	signal-peptide	1	25	2650.37	0	Unmodified	P28721_1frag25_1G_P1_1T	2650.37	2	P28721_1frag25_1G|GLTF_ECOLI|Protein GltF_P1
GLTF_ECOLI	chain	26	254	24100.2	0	Unmodified	P28721_26frag254_1G_P1_1T	24100.2	12	P28721_26frag254_1G|GLTF_ECOLI|Protein GltF_P1
GLTF_ECOLI	full	1	254	26732.6	0	Unmodified	P28721_1full254_1G_P1_1T	26732.6	14	P28721_1full254_1G|GLTF_ECOLI|Protein GltF_P1
GLTI_ECOLI	signal-peptide	1	22	2215.3	0	Unmodified	P37902_1frag22_1G_P1_1T	2215.3	1	P37902_1frag22_1G|GLTI_ECOLI|Glutamate/aspartate import solute-binding protein_P1
GLTI_ECOLI	chain	23	302	31572.4	0	Unmodified	P37902_23frag302_1G_P1_1T	31572.4	31	P37902_23frag302_1G|GLTI_ECOLI|Glutamate/aspartate import solute-binding protein_P1
GLTI_ECOLI	full	1	302	33769.7	0	Unmodified	P37902_1full302_1G_P1_1T	33769.7	32	P37902_1full302_1G|GLTI_ECOLI|Glutamate/aspartate import solute-binding protein_P1
GLTJ_ECOLI	full	1	246	27711.7	0	Unmodified	P0AER3_1full246_1G_P1_1T	27711.7	7	P0AER3_1full246_1G|GLTJ_ECOLI|Glutamate/aspartate import permease protein GltJ_P1
GLTK_ECOLI	full	1	224	24938.5	0	Unmodified	P0AER5_1full224_1G_P1_1T	24938.5	5	P0AER5_1full224_1G|GLTK_ECOLI|Glutamate/aspartate import permease protein GltK_P1
GLTL_ECOLI	full	1	241	26983.3	0	Unmodified	P0AAG3_1full241_1G_P1_1T	26983.3	21	P0AAG3_1full241_1G|GLTL_ECOLI|Glutamate/aspartate import ATP-binding protein GltL_P1
GLTP_ECOLI	full	1	437	47330.1	0	Unmodified	P21345_1full437_1G_P1_1T	47330.1	18	P21345_1full437_1G|GLTP_ECOLI|Proton/glutamate-aspartate symporter_P1
GLTS_ECOLI	full	1	401	42721.2	0	Unmodified	P0AER8_1full401_1G_P1_1T	42721.2	12	P0AER8_1full401_1G|GLTS_ECOLI|Sodium/glutamate symporter_P1
GLUQ_ECOLI	full	1	308	35130.1	0	Unmodified	P27305_1full308_1G_P1_1T	35130.1	7	P27305_1full308_1G|GLUQ_ECOLI|Glutamyl-Q tRNA(Asp) synthetase_P1
GLVG_ECOLI	full	1	212	23967.4	0	Unmodified	P31450_1full212_1G_P1_1T	23967.4	11	P31450_1full212_1G|GLVG_ECOLI|Putative inactive 6-phospho-alpha-glucosidase_P1
GLXK1_ECOLI	full	1	381	39501.3	0	Unmodified	P23524_1full381_1G_P1_1T	39501.3	17	P23524_1full381_1G|GLXK1_ECOLI|Glycerate 2-kinase_P1
GLXK2_ECOLI	full	1	381	39327.1	0	Unmodified	P77364_1full381_1G_P1_1T	39327.1	13	P77364_1full381_1G|GLXK2_ECOLI|Glycerate 3-kinase_P1
GLXR_ECOLI	full	1	292	31121.3	0	Unmodified	P77161_1full292_1G_P1_1T	31121.3	14	P77161_1full292_1G|GLXR_ECOLI|2-hydroxy-3-oxopropionate reductase_P1
GLYA_ECOLI	full	1	417	45691.4	0	Unmodified	P0A825_1full417_1G_P1_1T	45691.4	29	P0A825_1full417_1G|GLYA_ECOLI|Serine hydroxymethyltransferase_P1
GM4D_ECOLI	full	1	373	42351.6	0	Unmodified	P0AC88_1full373_1G_P1_1T	42351.6	20	P0AC88_1full373_1G|GM4D_ECOLI|GDP-mannose 4,6-dehydratase_P1
GMHA_ECOLI	full	1	192	21060.8	0	Unmodified	P63224_1full192_1G_P1_1T	21060.8	11	P63224_1full192_1G|GMHA_ECOLI|Phosphoheptose isomerase_P1
GMHBB_ECOLI	full	1	191	21539.8	0	Unmodified	P63228_1full191_1G_P1_1T	21539.8	11	P63228_1full191_1G|GMHBB_ECOLI|D-glycero-beta-D-manno-heptose-1,7-bisphosphate 7-phosphatase_P1
GMM_ECOLI	full	1	159	18286.2	0	Unmodified	P32056_1full159_1G_P1_1T	18286.2	3	P32056_1full159_1G|GMM_ECOLI|GDP-mannose mannosyl hydrolase_P1
GMR_ECOLI	full	1	661	75267	0	Unmodified	P77334_1full661_1G_P1_1T	75267	24	P77334_1full661_1G|GMR_ECOLI|Cyclic di-GMP phosphodiesterase Gmr_P1
GNGF_ECOLI	full	1	302	32904.6	0	Unmodified	P75767_1full302_1G_P1_1T	32904.6	10	P75767_1full302_1G|GNGF_ECOLI|Putative gluconeogenesis factor_P1
GNSA_ECOLI	full	1	57	6635.55	0	Unmodified	P0AC92_1full57_1G_P1_1T	6635.55	8	P0AC92_1full57_1G|GNSA_ECOLI|Protein GnsA_P1
GNSB_ECOLI	full	1	57	6623.7	0	Unmodified	P77695_1full57_1G_P1_1T	6623.7	10	P77695_1full57_1G|GNSB_ECOLI|Protein GnsB_P1
GNTK_ECOLI	chain	2	175	19561.2	0	Unmodified	P46859_2frag175_1G_P1_1T	19561.2	13	P46859_2frag175_1G|GNTK_ECOLI|Thermoresistant gluconokinase_P1
GNTK_ECOLI	full	1	175	19692.2	0	Unmodified	P46859_1full175_1G_P1_1T	19692.2	13	P46859_1full175_1G|GNTK_ECOLI|Thermoresistant gluconokinase_P1
GNTP_ECOLI	full	1	447	47275.9	0	Unmodified	P0AC94_1full447_1G_P1_1T	47275.9	14	P0AC94_1full447_1G|GNTP_ECOLI|High-affinity gluconate transporter_P1
GNTR_ECOLI	full	1	331	36666.1	0	Unmodified	P0ACP5_1full331_1G_P1_1T	36666.1	12	P0ACP5_1full331_1G|GNTR_ECOLI|HTH-type transcriptional regulator GntR_P1
GNTT_ECOLI	full	1	438	46243.2	0	Unmodified	P39835_1full438_1G_P1_1T	46243.2	17	P39835_1full438_1G|GNTT_ECOLI|High-affinity gluconate transporter_P1
GNTU_ECOLI	full	1	446	46896.1	0	Unmodified	P0AC96_1full446_1G_P1_1T	46896.1	14	P0AC96_1full446_1G|GNTU_ECOLI|Low-affinity gluconate transporter_P1
GNTX_ECOLI	full	1	227	26433.9	0	Unmodified	P46846_1full227_1G_P1_1T	26433.9	5	P46846_1full227_1G|GNTX_ECOLI|Protein GntX_P1
GPDA_ECOLI	full	1	339	36638.9	0	Unmodified	P0A6S7_1full339_1G_P1_1T	36638.9	9	P0A6S7_1full339_1G|GPDA_ECOLI|Glycerol-3-phosphate dehydrogenase [NAD(P)+]_P1
GPH_ECOLI	full	1	252	27517.2	0	Unmodified	P32662_1full252_1G_P1_1T	27517.2	11	P32662_1full252_1G|GPH_ECOLI|Phosphoglycolate phosphatase_P1
GPMA_ECOLI	chain	2	250	28584	0	Unmodified	P62707_2frag250_1G_P1_1T	28584	22	P62707_2frag250_1G|GPMA_ECOLI|2,3-bisphosphoglycerate-dependent phosphoglycerate mutase_P1
GPMA_ECOLI	full	1	250	28715.1	0	Unmodified	P62707_1full250_1G_P1_1T	28715.1	22	P62707_1full250_1G|GPMA_ECOLI|2,3-bisphosphoglycerate-dependent phosphoglycerate mutase_P1
GPMB_ECOLI	full	1	215	24359.4	0	Unmodified	P0A7A2_1full215_1G_P1_1T	24359.4	3	P0A7A2_1full215_1G|GPMB_ECOLI|Probable phosphoglycerate mutase GpmB_P1
GPMI_ECOLI	full	1	514	56520.8	0	Unmodified	P37689_1full514_1G_P1_1T	56520.8	31	P37689_1full514_1G|GPMI_ECOLI|2,3-bisphosphoglycerate-independent phosphoglycerate mutase_P1
GPPA_ECOLI	full	1	494	55389	0	Unmodified	P25552_1full494_1G_P1_1T	55389	12	P25552_1full494_1G|GPPA_ECOLI|Guanosine-5'-triphosphate,3'-diphosphate pyrophosphatase_P1
GPR_ECOLI	full	1	346	39042	0	Unmodified	Q46851_1full346_1G_P1_1T	39042	15	Q46851_1full346_1G|GPR_ECOLI|L-glyceraldehyde 3-phosphate reductase_P1
GRCA_ECOLI	full	1	127	14388.6	0	Unmodified	P68066_1full127_1G_P1_1T	14388.6	7	P68066_1full127_1G|GRCA_ECOLI|Autonomous glycyl radical cofactor_P1
GREA_ECOLI	full	1	158	17767.2	0	Unmodified	P0A6W5_1full158_1G_P1_1T	17767.2	10	P0A6W5_1full158_1G|GREA_ECOLI|Transcription elongation factor GreA_P1
GREB_ECOLI	full	1	158	18684.8	0	Unmodified	P30128_1full158_1G_P1_1T	18684.8	14	P30128_1full158_1G|GREB_ECOLI|Transcription elongation factor GreB_P1
GRPE_ECOLI	full	1	197	21888.3	0	Unmodified	P09372_1full197_1G_P1_1T	21888.3	13	P09372_1full197_1G|GRPE_ECOLI|Protein GrpE_P1
GSA_ECOLI	full	1	426	45994.8	0	Unmodified	P23893_1full426_1G_P1_1T	45994.8	11	P23893_1full426_1G|GSA_ECOLI|Glutamate-1-semialdehyde 2,1-aminomutase_P1
GSH1_ECOLI	full	1	518	58929.8	0	Unmodified	P0A6W9_1full518_1G_P1_1T	58929.8	23	P0A6W9_1full518_1G|GSH1_ECOLI|Glutamate--cysteine ligase_P1
GSHB_ECOLI	full	1	316	35910.6	0	Unmodified	P04425_1full316_1G_P1_1T	35910.6	18	P04425_1full316_1G|GSHB_ECOLI|Glutathione synthetase_P1
GSHR_ECOLI	full	1	450	49276.1	0	Unmodified	P06715_1full450_1G_P1_1T	49276.1	24	P06715_1full450_1G|GSHR_ECOLI|Glutathione reductase_P1
GSIA_ECOLI	full	1	623	69418.7	0	Unmodified	P75796_1full623_1G_P1_1T	69418.7	15	P75796_1full623_1G|GSIA_ECOLI|Glutathione import ATP-binding protein GsiA_P1
GSIB_ECOLI	signal-peptide	1	26	2644.38	0	Unmodified	P75797_1frag26_1G_P1_1T	2644.38	0	P75797_1frag26_1G|GSIB_ECOLI|Glutathione-binding protein GsiB_P1
GSIB_ECOLI	chain	27	512	54161.9	0	Unmodified	P75797_27frag512_1G_P1_1T	54161.9	37	P75797_27frag512_1G|GSIB_ECOLI|Glutathione-binding protein GsiB_P1
GSIB_ECOLI	full	1	512	56788.3	0	Unmodified	P75797_1full512_1G_P1_1T	56788.3	37	P75797_1full512_1G|GSIB_ECOLI|Glutathione-binding protein GsiB_P1
GSIC_ECOLI	full	1	306	34084.3	0	Unmodified	P75798_1full306_1G_P1_1T	34084.3	5	P75798_1full306_1G|GSIC_ECOLI|Glutathione transport system permease protein GsiC_P1
GSID_ECOLI	full	1	303	33306	0	Unmodified	P75799_1full303_1G_P1_1T	33306	4	P75799_1full303_1G|GSID_ECOLI|Glutathione transport system permease protein GsiD_P1
GSP_ECOLI	chain	2	619	71118	0	Unmodified	P0AES0_2frag619_1G_P1_1T	71118	31	P0AES0_2frag619_1G|GSP_ECOLI|Bifunctional glutathionylspermidine synthetase/amidase_P1
GSP_ECOLI	full	1	619	71249	0	Unmodified	P0AES0_1full619_1G_P1_1T	71249	31	P0AES0_1full619_1G|GSP_ECOLI|Bifunctional glutathionylspermidine synthetase/amidase_P1
GSPA_ECOLI	full	1	489	55935.7	0	Unmodified	P45756_1full489_1G_P1_1T	55935.7	27	P45756_1full489_1G|GSPA_ECOLI|Putative general secretion pathway protein A_P1
GSPB_ECOLI	full	1	139	16044.2	0	Unmodified	P03825_1full139_1G_P1_1T	16044.2	8	P03825_1full139_1G|GSPB_ECOLI|Putative general secretion pathway protein B_P1
GSPC_ECOLI	full	1	271	30099.9	0	Unmodified	P45757_1full271_1G_P1_1T	30099.9	10	P45757_1full271_1G|GSPC_ECOLI|Putative type II secretion system protein C_P1
GSPD_ECOLI	signal-peptide	1	23	2558.3	0	Unmodified	P45758_1frag23_1G_P1_1T	2558.3	2	P45758_1frag23_1G|GSPD_ECOLI|Putative type II secretion system protein D_P1
GSPD_ECOLI	chain	24	650	68574	0	Unmodified	P45758_24frag650_1G_P1_1T	68574	34	P45758_24frag650_1G|GSPD_ECOLI|Putative type II secretion system protein D_P1
GSPD_ECOLI	full	1	650	71114.2	0	Unmodified	P45758_1full650_1G_P1_1T	71114.2	36	P45758_1full650_1G|GSPD_ECOLI|Putative type II secretion system protein D_P1
GSPE_ECOLI	full	1	493	54965.7	0	Unmodified	P45759_1full493_1G_P1_1T	54965.7	13	P45759_1full493_1G|GSPE_ECOLI|Putative type II secretion system protein E_P1
GSPF_ECOLI	full	1	398	44529.3	0	Unmodified	P41441_1full398_1G_P1_1T	44529.3	13	P41441_1full398_1G|GSPF_ECOLI|Putative type II secretion system protein F_P1
GSPG_ECOLI	propeptide	1	9	1069.55	0	Unmodified	P41442_1frag9_1G_P1_1T	1069.55	1	P41442_1frag9_1G|GSPG_ECOLI|Putative type II secretion system protein G_P1
GSPG_ECOLI	chain	10	145	14939.8	0	Unmodified	P41442_10frag145_1G_P1_1T	14939.8	11	P41442_10frag145_1G|GSPG_ECOLI|Putative type II secretion system protein G_P1
GSPG_ECOLI	full	1	145	15991.3	0	Unmodified	P41442_1full145_1G_P1_1T	15991.3	12	P41442_1full145_1G|GSPG_ECOLI|Putative type II secretion system protein G_P1
GSPH_ECOLI	chain	7	169	17912.1	0	Unmodified	P41443_7frag169_1G_P1_1T	17912.1	2	P41443_7frag169_1G|GSPH_ECOLI|Putative type II secretion system protein H_P1
GSPH_ECOLI	full	1	169	18626.4	0	Unmodified	P41443_1full169_1G_P1_1T	18626.4	2	P41443_1full169_1G|GSPH_ECOLI|Putative type II secretion system protein H_P1
GSPI_ECOLI	chain	7	125	13271.5	0	Unmodified	P45760_7frag125_1G_P1_1T	13271.5	3	P45760_7frag125_1G|GSPI_ECOLI|Putative type II secretion system protein I_P1
GSPI_ECOLI	full	1	125	13924.8	0	Unmodified	P45760_1full125_1G_P1_1T	13924.8	4	P45760_1full125_1G|GSPI_ECOLI|Putative type II secretion system protein I_P1
GSPJ_ECOLI	propeptide	1	7	845.418	0	Unmodified	P45761_1frag7_1G_P1_1T	845.418	0	P45761_1frag7_1G|GSPJ_ECOLI|Putative type II secretion system protein J_P1
GSPJ_ECOLI	chain	8	195	21414	0	Unmodified	P45761_8frag195_1G_P1_1T	21414	3	P45761_8frag195_1G|GSPJ_ECOLI|Putative type II secretion system protein J_P1
GSPJ_ECOLI	full	1	195	22241.4	0	Unmodified	P45761_1full195_1G_P1_1T	22241.4	3	P45761_1full195_1G|GSPJ_ECOLI|Putative type II secretion system protein J_P1
GSPK_ECOLI	full	1	327	37809.3	0	Unmodified	P45762_1full327_1G_P1_1T	37809.3	9	P45762_1full327_1G|GSPK_ECOLI|Putative type II secretion system protein K_P1
GSPL_ECOLI	full	1	387	44892.1	0	Unmodified	P45763_1full387_1G_P1_1T	44892.1	19	P45763_1full387_1G|GSPL_ECOLI|Putative type II secretion system protein L_P1
GSPM_ECOLI	full	1	153	17360.3	0	Unmodified	P36678_1full153_1G_P1_1T	17360.3	10	P36678_1full153_1G|GSPM_ECOLI|Putative type II secretion system protein M_P1
GSTA_ECOLI	full	1	201	23080.1	0	Unmodified	P0A9D2_1full201_1G_P1_1T	23080.1	14	P0A9D2_1full201_1G|GSTA_ECOLI|Glutathione S-transferase GstA_P1
GSTB_ECOLI	full	1	208	23876.3	0	Unmodified	P0ACA7_1full208_1G_P1_1T	23876.3	8	P0ACA7_1full208_1G|GSTB_ECOLI|Glutathione S-transferase GstB_P1
GTRA_ECOLI	full	1	120	13436	0	Unmodified	P77682_1full120_1G_P1_1T	13436	6	P77682_1full120_1G|GTRA_ECOLI|Prophage bactoprenol-linked glucose translocase homolog_P1
GTRB_ECOLI	full	1	306	34797.8	0	Unmodified	P77293_1full306_1G_P1_1T	34797.8	23	P77293_1full306_1G|GTRB_ECOLI|Prophage bactoprenol glucosyl transferase homolog_P1
GUAA_ECOLI	full	1	525	59233.4	0	Unmodified	P04079_1full525_1G_P1_1T	59233.4	24	P04079_1full525_1G|GUAA_ECOLI|GMP synthase [glutamine-hydrolyzing]_P1
GUAC_ECOLI	full	1	347	37919.2	0	Unmodified	P60560_1full347_1G_P1_1T	37919.2	20	P60560_1full347_1G|GUAC_ECOLI|GMP reductase_P1
GUAD_ECOLI	full	1	439	50640.6	0	Unmodified	P76641_1full439_1G_P1_1T	50640.6	25	P76641_1full439_1G|GUAD_ECOLI|Guanine deaminase_P1
GUDD_ECOLI	chain	2	446	49358.9	0	Unmodified	P0AES2_2frag446_1G_P1_1T	49358.9	19	P0AES2_2frag446_1G|GUDD_ECOLI|Glucarate dehydratase_P1
GUDD_ECOLI	full	1	446	49489.9	0	Unmodified	P0AES2_1full446_1G_P1_1T	49489.9	19	P0AES2_1full446_1G|GUDD_ECOLI|Glucarate dehydratase_P1
GUDP_ECOLI	full	1	450	49408.9	0	Unmodified	Q46916_1full450_1G_P1_1T	49408.9	16	Q46916_1full450_1G|GUDP_ECOLI|Probable glucarate transporter_P1
GUDX_ECOLI	full	1	446	49313.1	0	Unmodified	Q46915_1full446_1G_P1_1T	49313.1	19	Q46915_1full446_1G|GUDX_ECOLI|Glucarate dehydratase-related protein_P1
GUN_ECOLI	signal-peptide	1	21	2233.23	0	Unmodified	P37651_1frag21_1G_P1_1T	2233.23	0	P37651_1frag21_1G|GUN_ECOLI|Endoglucanase_P1
GUN_ECOLI	chain	22	368	39749	0	Unmodified	P37651_22frag368_1G_P1_1T	39749	22	P37651_22frag368_1G|GUN_ECOLI|Endoglucanase_P1
GUN_ECOLI	full	1	368	41964.2	0	Unmodified	P37651_1full368_1G_P1_1T	41964.2	22	P37651_1full368_1G|GUN_ECOLI|Endoglucanase_P1
GUTM_ECOLI	full	1	119	13099.1	0	Unmodified	P15081_1full119_1G_P1_1T	13099.1	5	P15081_1full119_1G|GUTM_ECOLI|Glucitol operon activator protein_P1
GUTQ_ECOLI	chain	2	321	34153.9	0	Unmodified	P17115_2frag321_1G_P1_1T	34153.9	13	P17115_2frag321_1G|GUTQ_ECOLI|Arabinose 5-phosphate isomerase GutQ_P1
GUTQ_ECOLI	full	1	321	34284.9	0	Unmodified	P17115_1full321_1G_P1_1T	34284.9	13	P17115_1full321_1G|GUTQ_ECOLI|Arabinose 5-phosphate isomerase GutQ_P1
GYRA_ECOLI	chain	2	875	97345.1	0	Unmodified	P0AES4_2frag875_1G_P1_1T	97345.1	43	P0AES4_2frag875_1G|GYRA_ECOLI|DNA gyrase subunit A_P1
GYRA_ECOLI	full	1	875	97476.1	0	Unmodified	P0AES4_1full875_1G_P1_1T	97476.1	43	P0AES4_1full875_1G|GYRA_ECOLI|DNA gyrase subunit A_P1
GYRB_ECOLI	chain	2	804	90464.7	0	Unmodified	P0AES6_2frag804_1G_P1_1T	90464.7	52	P0AES6_2frag804_1G|GYRB_ECOLI|DNA gyrase subunit B_P1
GYRB_ECOLI	full	1	804	90595.7	0	Unmodified	P0AES6_1full804_1G_P1_1T	90595.7	52	P0AES6_1full804_1G|GYRB_ECOLI|DNA gyrase subunit B_P1
HCAB_ECOLI	full	1	270	28757.8	0	Unmodified	P0CI31_1full270_1G_P1_1T	28757.8	6	P0CI31_1full270_1G|HCAB_ECOLI|3-phenylpropionate-dihydrodiol/cinnamic acid-dihydrodiol dehydrogenase_P1
HCAC_ECOLI	full	1	106	11622.5	0	Unmodified	P0ABW0_1full106_1G_P1_1T	11622.5	2	P0ABW0_1full106_1G|HCAC_ECOLI|3-phenylpropionate/cinnamic acid dioxygenase ferredoxin subunit_P1
HCAD_ECOLI	full	1	400	44381.1	0	Unmodified	P77650_1full400_1G_P1_1T	44381.1	11	P77650_1full400_1G|HCAD_ECOLI|3-phenylpropionate/cinnamic acid dioxygenase ferredoxin--NAD(+) reductase component_P1
HCAE_ECOLI	full	1	453	51799.4	0	Unmodified	P0ABR5_1full453_1G_P1_1T	51799.4	19	P0ABR5_1full453_1G|HCAE_ECOLI|3-phenylpropionate/cinnamic acid dioxygenase subunit alpha_P1
HCAF_ECOLI	full	1	172	20663.6	0	Unmodified	Q47140_1full172_1G_P1_1T	20663.6	5	Q47140_1full172_1G|HCAF_ECOLI|3-phenylpropionate/cinnamic acid dioxygenase subunit beta_P1
HCAR_ECOLI	full	1	296	33027.7	0	Unmodified	Q47141_1full296_1G_P1_1T	33027.7	12	Q47141_1full296_1G|HCAR_ECOLI|Hca operon transcriptional activator HcaR_P1
HCAT_ECOLI	full	1	379	42012.5	0	Unmodified	Q47142_1full379_1G_P1_1T	42012.5	6	Q47142_1full379_1G|HCAT_ECOLI|Probable 3-phenylpropionic acid transporter_P1
HCHA_ECOLI	chain	2	283	31297.9	0	Unmodified	P31658_2frag283_1G_P1_1T	31297.9	18	P31658_2frag283_1G|HCHA_ECOLI|Protein deglycase 1_P1
HCHA_ECOLI	full	1	283	31428.9	0	Unmodified	P31658_1full283_1G_P1_1T	31428.9	18	P31658_1full283_1G|HCHA_ECOLI|Protein deglycase 1_P1
HCP_ECOLI	full	1	550	60999.9	0	Unmodified	P75825_1full550_1G_P1_1T	60999.9	22	P75825_1full550_1G|HCP_ECOLI|Hydroxylamine reductase_P1
HCR_ECOLI	full	1	322	36432.2	0	Unmodified	P75824_1full322_1G_P1_1T	36432.2	11	P75824_1full322_1G|HCR_ECOLI|NADH oxidoreductase HCR_P1
HDA_ECOLI	full	1	233	26851.1	0	Unmodified	P69931_1full233_1G_P1_1T	26851.1	8	P69931_1full233_1G|HDA_ECOLI|DnaA regulatory inactivator Hda_P1
HDEA_ECOLI	signal-peptide	1	21	2149.36	0	Unmodified	P0AES9_1frag21_1G_P1_1T	2149.36	2	P0AES9_1frag21_1G|HDEA_ECOLI|Acid stress chaperone HdeA_P1
HDEA_ECOLI	chain	22	110	9945.04	0	Unmodified	P0AES9_22frag110_1G_P1_1T	9945.04	12	P0AES9_22frag110_1G|HDEA_ECOLI|Acid stress chaperone HdeA_P1
HDEA_ECOLI	full	1	110	12076.4	0	Unmodified	P0AES9_1full110_1G_P1_1T	12076.4	14	P0AES9_1full110_1G|HDEA_ECOLI|Acid stress chaperone HdeA_P1
HDEB_ECOLI	signal-peptide	1	29	3001.63	0	Unmodified	P0AET2_1frag29_1G_P1_1T	3001.63	1	P0AET2_1frag29_1G|HDEB_ECOLI|Acid stress chaperone HdeB_P1
HDEB_ECOLI	chain	30	108	9237.55	0	Unmodified	P0AET2_30frag108_1G_P1_1T	9237.55	8	P0AET2_30frag108_1G|HDEB_ECOLI|Acid stress chaperone HdeB_P1
HDEB_ECOLI	full	1	108	12221.2	0	Unmodified	P0AET2_1full108_1G_P1_1T	12221.2	9	P0AET2_1full108_1G|HDEB_ECOLI|Acid stress chaperone HdeB_P1
HDED_ECOLI	full	1	190	21108.7	0	Unmodified	P0AET5_1full190_1G_P1_1T	21108.7	6	P0AET5_1full190_1G|HDED_ECOLI|Protein HdeD_P1
HDFR_ECOLI	full	1	279	31928.6	0	Unmodified	P0A8R9_1full279_1G_P1_1T	31928.6	11	P0A8R9_1full279_1G|HDFR_ECOLI|HTH-type transcriptional regulator HdfR_P1
HDHA_ECOLI	full	1	255	27077.8	0	Unmodified	P0AET8_1full255_1G_P1_1T	27077.8	11	P0AET8_1full255_1G|HDHA_ECOLI|7-alpha-hydroxysteroid dehydrogenase_P1
HELD_ECOLI	full	1	684	78517.1	0	Unmodified	P15038_1full684_1G_P1_1T	78517.1	38	P15038_1full684_1G|HELD_ECOLI|DNA helicase IV_P1
HEM1_ECOLI	full	1	418	46593.5	0	Unmodified	P0A6X1_1full418_1G_P1_1T	46593.5	18	P0A6X1_1full418_1G|HEM1_ECOLI|Glutamyl-tRNA reductase_P1
HEM2_ECOLI	chain	2	324	35933.2	0	Unmodified	P0ACB2_2frag324_1G_P1_1T	35933.2	15	P0ACB2_2frag324_1G|HEM2_ECOLI|Delta-aminolevulinic acid dehydratase_P1
HEM2_ECOLI	full	1	324	36064.2	0	Unmodified	P0ACB2_1full324_1G_P1_1T	36064.2	15	P0ACB2_1full324_1G|HEM2_ECOLI|Delta-aminolevulinic acid dehydratase_P1
HEM3_ECOLI	full	1	313	34123	0	Unmodified	P06983_1full313_1G_P1_1T	34123	8	P06983_1full313_1G|HEM3_ECOLI|Porphobilinogen deaminase_P1
HEM4_ECOLI	full	1	246	28048.6	0	Unmodified	P09126_1full246_1G_P1_1T	28048.6	5	P09126_1full246_1G|HEM4_ECOLI|Uroporphyrinogen-III synthase_P1
HEM6_ECOLI	full	1	299	34609	0	Unmodified	P36553_1full299_1G_P1_1T	34609	10	P36553_1full299_1G|HEM6_ECOLI|Oxygen-dependent coproporphyrinogen-III oxidase_P1
HEMG_ECOLI	full	1	181	21366.1	0	Unmodified	P0ACB4_1full181_1G_P1_1T	21366.1	12	P0ACB4_1full181_1G|HEMG_ECOLI|Protoporphyrinogen IX dehydrogenase [menaquinone]_P1
HEMH_ECOLI	full	1	320	36177.5	0	Unmodified	P23871_1full320_1G_P1_1T	36177.5	11	P23871_1full320_1G|HEMH_ECOLI|Ferrochelatase_P1
HEMN_ECOLI	full	1	457	53377.2	0	Unmodified	P32131_1full457_1G_P1_1T	53377.2	21	P32131_1full457_1G|HEMN_ECOLI|Oxygen-independent coproporphyrinogen III oxidase_P1
HEMX_ECOLI	full	1	393	43097.2	0	Unmodified	P09127_1full393_1G_P1_1T	43097.2	20	P09127_1full393_1G|HEMX_ECOLI|Putative uroporphyrinogen-III C-methyltransferase_P1
HEMY_ECOLI	full	1	398	45410.1	0	Unmodified	P0ACB7_1full398_1G_P1_1T	45410.1	17	P0ACB7_1full398_1G|HEMY_ECOLI|Protein HemY_P1
HEXR_ECOLI	full	1	289	32246.6	0	Unmodified	P46118_1full289_1G_P1_1T	32246.6	15	P46118_1full289_1G|HEXR_ECOLI|HTH-type transcriptional regulator HexR_P1
HFLC_ECOLI	full	1	334	37786.8	0	Unmodified	P0ABC3_1full334_1G_P1_1T	37786.8	20	P0ABC3_1full334_1G|HFLC_ECOLI|Modulator of FtsH protease HflC_P1
HFLD_ECOLI	full	1	213	23087.3	0	Unmodified	P25746_1full213_1G_P1_1T	23087.3	5	P25746_1full213_1G|HFLD_ECOLI|High frequency lysogenization protein HflD_P1
HFLK_ECOLI	full	1	419	45685.4	0	Unmodified	P0ABC7_1full419_1G_P1_1T	45685.4	21	P0ABC7_1full419_1G|HFLK_ECOLI|Modulator of FtsH protease HflK_P1
HFLX_ECOLI	full	1	426	48588.6	0	Unmodified	P25519_1full426_1G_P1_1T	48588.6	15	P25519_1full426_1G|HFLX_ECOLI|GTPase HflX_P1
HFQ_ECOLI	chain	2	102	11060.6	0	Unmodified	P0A6X3_2frag102_1G_P1_1T	11060.6	4	P0A6X3_2frag102_1G|HFQ_ECOLI|RNA-binding protein Hfq_P1
HFQ_ECOLI	full	1	102	11191.6	0	Unmodified	P0A6X3_1full102_1G_P1_1T	11191.6	4	P0A6X3_1full102_1G|HFQ_ECOLI|RNA-binding protein Hfq_P1
HHA_ECOLI	full	1	72	8735.59	0	Unmodified	P0ACE3_1full72_1G_P1_1T	8735.59	7	P0ACE3_1full72_1G|HHA_ECOLI|Hemolysin expression-modulating protein Hha_P1
HICA_ECOLI	full	1	58	6874.69	0	Unmodified	P76106_1full58_1G_P1_1T	6874.69	5	P76106_1full58_1G|HICA_ECOLI|Probable mRNA interferase HicA_P1
HICB_ECOLI	full	1	138	15293.1	0	Unmodified	P67697_1full138_1G_P1_1T	15293.1	7	P67697_1full138_1G|HICB_ECOLI|Antitoxin HicB_P1
HIGA_ECOLI	full	1	138	15099	0	Unmodified	P67701_1full138_1G_P1_1T	15099	7	P67701_1full138_1G|HIGA_ECOLI|Antitoxin HigA_P1
HIGB_ECOLI	full	1	104	12272.6	0	Unmodified	P64578_1full104_1G_P1_1T	12272.6	15	P64578_1full104_1G|HIGB_ECOLI|mRNA interferase HigB_P1
HINT_ECOLI	full	1	119	13256.9	0	Unmodified	P0ACE7_1full119_1G_P1_1T	13256.9	3	P0ACE7_1full119_1G|HINT_ECOLI|Purine nucleoside phosphoramidase_P1
HIPA_ECOLI	full	1	440	49608.1	0	Unmodified	P23874_1full440_1G_P1_1T	49608.1	24	P23874_1full440_1G|HIPA_ECOLI|Serine/threonine-protein kinase HipA_P1
HIPB_ECOLI	full	1	88	10123.1	0	Unmodified	P23873_1full88_1G_P1_1T	10123.1	7	P23873_1full88_1G|HIPB_ECOLI|Antitoxin HipB_P1
HIS1_ECOLI	full	1	299	33734.7	0	Unmodified	P60757_1full299_1G_P1_1T	33734.7	13	P60757_1full299_1G|HIS1_ECOLI|ATP phosphoribosyltransferase_P1
HIS2_ECOLI	full	1	203	23000.7	0	Unmodified	P06989_1full203_1G_P1_1T	23000.7	11	P06989_1full203_1G|HIS2_ECOLI|Histidine biosynthesis bifunctional protein HisIE_P1
HIS4_ECOLI	full	1	245	26267.8	0	Unmodified	P10371_1full245_1G_P1_1T	26267.8	10	P10371_1full245_1G|HIS4_ECOLI|1-(5-phosphoribosyl)-5-[(5-phosphoribosylamino)methylideneamino] imidazole-4-carboxamide isomerase_P1
HIS5_ECOLI	full	1	196	21931	0	Unmodified	P60595_1full196_1G_P1_1T	21931	8	P60595_1full196_1G|HIS5_ECOLI|Imidazole glycerol phosphate synthase subunit HisH_P1
HIS6_ECOLI	full	1	258	28825.9	0	Unmodified	P60664_1full258_1G_P1_1T	28825.9	13	P60664_1full258_1G|HIS6_ECOLI|Imidazole glycerol phosphate synthase subunit HisF_P1
HIS7_ECOLI	full	1	355	40746.7	0	Unmodified	P06987_1full355_1G_P1_1T	40746.7	19	P06987_1full355_1G|HIS7_ECOLI|Histidine biosynthesis bifunctional protein HisB_P1
HIS8_ECOLI	full	1	356	39944.7	0	Unmodified	P06986_1full356_1G_P1_1T	39944.7	12	P06986_1full356_1G|HIS8_ECOLI|Histidinol-phosphate aminotransferase_P1
HISJ_ECOLI	signal-peptide	1	22	2283.32	0	Unmodified	P0AEU0_1frag22_1G_P1_1T	2283.32	2	P0AEU0_1frag22_1G|HISJ_ECOLI|Histidine-binding periplasmic protein_P1
HISJ_ECOLI	chain	23	260	26506.7	0	Unmodified	P0AEU0_23frag260_1G_P1_1T	26506.7	22	P0AEU0_23frag260_1G|HISJ_ECOLI|Histidine-binding periplasmic protein_P1
HISJ_ECOLI	full	1	260	28772	0	Unmodified	P0AEU0_1full260_1G_P1_1T	28772	24	P0AEU0_1full260_1G|HISJ_ECOLI|Histidine-binding periplasmic protein_P1
HISM_ECOLI	full	1	238	27079.6	0	Unmodified	P0AEU3_1full238_1G_P1_1T	27079.6	7	P0AEU3_1full238_1G|HISM_ECOLI|Histidine transport system permease protein HisM_P1
HISP_ECOLI	full	1	257	28820.3	0	Unmodified	P07109_1full257_1G_P1_1T	28820.3	16	P07109_1full257_1G|HISP_ECOLI|Histidine transport ATP-binding protein HisP_P1
HISQ_ECOLI	full	1	228	24738.4	0	Unmodified	P52094_1full228_1G_P1_1T	24738.4	6	P52094_1full228_1G|HISQ_ECOLI|Histidine transport system permease protein HisQ_P1
HISX_ECOLI	chain	2	434	46486	0	Unmodified	P06988_2frag434_1G_P1_1T	46486	17	P06988_2frag434_1G|HISX_ECOLI|Histidinol dehydrogenase_P1
HISX_ECOLI	full	1	434	46617	0	Unmodified	P06988_1full434_1G_P1_1T	46617	17	P06988_1full434_1G|HISX_ECOLI|Histidinol dehydrogenase_P1
HIUH_ECOLI	signal-peptide	1	23	2471.41	0	Unmodified	P76341_1frag23_1G_P1_1T	2471.41	1	P76341_1frag23_1G|HIUH_ECOLI|5-hydroxyisourate hydrolase_P1
HIUH_ECOLI	chain	24	137	13084.8	0	Unmodified	P76341_24frag137_1G_P1_1T	13084.8	10	P76341_24frag137_1G|HIUH_ECOLI|5-hydroxyisourate hydrolase_P1
HIUH_ECOLI	full	1	137	15538.2	0	Unmodified	P76341_1full137_1G_P1_1T	15538.2	11	P76341_1full137_1G|HIUH_ECOLI|5-hydroxyisourate hydrolase_P1
HLDD_ECOLI	full	1	310	35129.4	0	Unmodified	P67910_1full310_1G_P1_1T	35129.4	18	P67910_1full310_1G|HLDD_ECOLI|ADP-L-glycero-D-manno-heptose-6-epimerase_P1
HLDE_ECOLI	full	1	477	51455.2	0	Unmodified	P76658_1full477_1G_P1_1T	51455.2	26	P76658_1full477_1G|HLDE_ECOLI|Bifunctional protein HldE_P1
HLYE_ECOLI	chain	2	303	33977	0	Unmodified	P77335_2frag303_1G_P1_1T	33977	32	P77335_2frag303_1G|HLYE_ECOLI|Hemolysin E, chromosomal_P1
HLYE_ECOLI	full	1	303	34108	0	Unmodified	P77335_1full303_1G_P1_1T	34108	32	P77335_1full303_1G|HLYE_ECOLI|Hemolysin E, chromosomal_P1
HMP_ECOLI	full	1	396	44122.4	0	Unmodified	P24232_1full396_1G_P1_1T	44122.4	21	P24232_1full396_1G|HMP_ECOLI|Flavohemoprotein_P1
HNS_ECOLI	chain	2	137	15552.2	0	Unmodified	P0ACF8_2frag137_1G_P1_1T	15552.2	12	P0ACF8_2frag137_1G|HNS_ECOLI|DNA-binding protein H-NS_P1
HNS_ECOLI	full	1	137	15683.2	0	Unmodified	P0ACF8_1full137_1G_P1_1T	15683.2	12	P0ACF8_1full137_1G|HNS_ECOLI|DNA-binding protein H-NS_P1
HOA_ECOLI	full	1	337	36779.5	0	Unmodified	P51020_1full337_1G_P1_1T	36779.5	13	P51020_1full337_1G|HOA_ECOLI|4-hydroxy-2-oxovalerate aldolase_P1
HOFB_ECOLI	full	1	461	51225.8	0	Unmodified	P36645_1full461_1G_P1_1T	51225.8	9	P36645_1full461_1G|HOFB_ECOLI|Protein transport protein HofB homolog_P1
HOFC_ECOLI	full	1	400	44761.9	0	Unmodified	P36646_1full400_1G_P1_1T	44761.9	14	P36646_1full400_1G|HOFC_ECOLI|Protein transport protein HofC homolog_P1
HOFM_ECOLI	full	1	259	29217.1	0	Unmodified	P45753_1full259_1G_P1_1T	29217.1	8	P45753_1full259_1G|HOFM_ECOLI|Putative DNA utilization protein HofM_P1
HOFN_ECOLI	full	1	179	20807.2	0	Unmodified	P64634_1full179_1G_P1_1T	20807.2	3	P64634_1full179_1G|HOFN_ECOLI|Putative DNA utilization protein HofN_P1
HOFO_ECOLI	full	1	146	16908.6	0	Unmodified	P45751_1full146_1G_P1_1T	16908.6	2	P45751_1full146_1G|HOFO_ECOLI|Putative DNA utilization protein HofO_P1
HOFP_ECOLI	full	1	134	15315.8	0	Unmodified	P45750_1full134_1G_P1_1T	15315.8	7	P45750_1full134_1G|HOFP_ECOLI|Putative DNA utilization protein HofP_P1
HOFQ_ECOLI	signal-peptide	1	18	2003.16	0	Unmodified	P34749_1frag18_1G_P1_1T	2003.16	1	P34749_1frag18_1G|HOFQ_ECOLI|Putative DNA transport protein HofQ_P1
HOFQ_ECOLI	chain	19	412	42888.1	0	Unmodified	P34749_19frag412_1G_P1_1T	42888.1	22	P34749_19frag412_1G|HOFQ_ECOLI|Putative DNA transport protein HofQ_P1
HOFQ_ECOLI	full	1	412	44873.2	0	Unmodified	P34749_1full412_1G_P1_1T	44873.2	23	P34749_1full412_1G|HOFQ_ECOLI|Putative DNA transport protein HofQ_P1
HOKA_ECOLI	full	1	50	6197.28	0	Unmodified	P37305_1full50_1G_P1_1T	6197.28	4	P37305_1full50_1G|HOKA_ECOLI|Protein HokA_P1
HOKB_ECOLI	full	1	49	5809.11	0	Unmodified	P77494_1full49_1G_P1_1T	5809.11	2	P77494_1full49_1G|HOKB_ECOLI|Toxin HokB_P1
HOKC_ECOLI	full	1	50	5636.02	0	Unmodified	P0ACG4_1full50_1G_P1_1T	5636.02	3	P0ACG4_1full50_1G|HOKC_ECOLI|Protein HokC_P1
HOKD_ECOLI	full	1	51	5871.2	0	Unmodified	P0ACG6_1full51_1G_P1_1T	5871.2	3	P0ACG6_1full51_1G|HOKD_ECOLI|Protein HokD_P1
HOKE_ECOLI	full	1	50	5714.17	0	Unmodified	P77091_1full50_1G_P1_1T	5714.17	5	P77091_1full50_1G|HOKE_ECOLI|Protein HokE_P1
HOLA_ECOLI	full	1	343	39044.7	0	Unmodified	P28630_1full343_1G_P1_1T	39044.7	10	P28630_1full343_1G|HOLA_ECOLI|DNA polymerase III subunit delta_P1
HOLB_ECOLI	full	1	334	37376.4	0	Unmodified	P28631_1full334_1G_P1_1T	37376.4	8	P28631_1full334_1G|HOLB_ECOLI|DNA polymerase III subunit delta'_P1
HOLC_ECOLI	full	1	147	16792.6	0	Unmodified	P28905_1full147_1G_P1_1T	16792.6	7	P28905_1full147_1G|HOLC_ECOLI|DNA polymerase III subunit chi_P1
HOLD_ECOLI	full	1	137	15286.9	0	Unmodified	P28632_1full137_1G_P1_1T	15286.9	1	P28632_1full137_1G|HOLD_ECOLI|DNA polymerase III subunit psi_P1
HOLE_ECOLI	full	1	76	8888.8	0	Unmodified	P0ABS8_1full76_1G_P1_1T	8888.8	6	P0ABS8_1full76_1G|HOLE_ECOLI|DNA polymerase III subunit theta_P1
HPF_ECOLI	full	1	95	10815.7	0	Unmodified	P0AFX0_1full95_1G_P1_1T	10815.7	9	P0AFX0_1full95_1G|HPF_ECOLI|Ribosome hibernation promoting factor_P1
HPPK_ECOLI	chain	2	159	17976.4	0	Unmodified	P26281_2frag159_1G_P1_1T	17976.4	5	P26281_2frag159_1G|HPPK_ECOLI|2-amino-4-hydroxy-6-hydroxymethyldihydropteridine pyrophosphokinase_P1
HPPK_ECOLI	full	1	159	18107.4	0	Unmodified	P26281_1full159_1G_P1_1T	18107.4	5	P26281_1full159_1G|HPPK_ECOLI|2-amino-4-hydroxy-6-hydroxymethyldihydropteridine pyrophosphokinase_P1
HPRT_ECOLI	full	1	178	20296.6	0	Unmodified	P0A9M2_1full178_1G_P1_1T	20296.6	10	P0A9M2_1full178_1G|HPRT_ECOLI|Hypoxanthine phosphoribosyltransferase_P1
HRPA_ECOLI	full	1	1300	150081	0	Unmodified	P43329_1full1300_1G_P1_1T	150081	79	P43329_1full1300_1G|HRPA_ECOLI|ATP-dependent RNA helicase HrpA_P1
HRPB_ECOLI	full	1	809	89683.4	0	Unmodified	P37024_1full809_1G_P1_1T	89683.4	24	P37024_1full809_1G|HRPB_ECOLI|ATP-dependent RNA helicase HrpB_P1
HSCA_ECOLI	full	1	616	65870.3	0	Unmodified	P0A6Z1_1full616_1G_P1_1T	65870.3	18	P0A6Z1_1full616_1G|HSCA_ECOLI|Chaperone protein HscA_P1
HSCB_ECOLI	full	1	171	20189.3	0	Unmodified	P0A6L9_1full171_1G_P1_1T	20189.3	8	P0A6L9_1full171_1G|HSCB_ECOLI|Co-chaperone protein HscB_P1
HSCC_ECOLI	full	1	556	62393.3	0	Unmodified	P77319_1full556_1G_P1_1T	62393.3	20	P77319_1full556_1G|HSCC_ECOLI|Chaperone protein HscC_P1
HSLJ_ECOLI	full	1	140	15414.8	0	Unmodified	P52644_1full140_1G_P1_1T	15414.8	11	P52644_1full140_1G|HSLJ_ECOLI|Heat shock protein HslJ_P1
HSLO_ECOLI	full	1	292	32912.1	0	Unmodified	P0A6Y5_1full292_1G_P1_1T	32912.1	7	P0A6Y5_1full292_1G|HSLO_ECOLI|33 kDa chaperonin_P1
HSLR_ECOLI	full	1	133	15598.5	0	Unmodified	P0ACG8_1full133_1G_P1_1T	15598.5	14	P0ACG8_1full133_1G|HSLR_ECOLI|Heat shock protein 15_P1
HSLU_ECOLI	full	1	443	49917.3	0	Unmodified	P0A6H5_1full443_1G_P1_1T	49917.3	30	P0A6H5_1full443_1G|HSLU_ECOLI|ATP-dependent protease ATPase subunit HslU_P1
HSLV_ECOLI	chain	2	176	19087.1	0	Unmodified	P0A7B8_2frag176_1G_P1_1T	19087.1	10	P0A7B8_2frag176_1G|HSLV_ECOLI|ATP-dependent protease subunit HslV_P1
HSLV_ECOLI	full	1	176	19218.1	0	Unmodified	P0A7B8_1full176_1G_P1_1T	19218.1	10	P0A7B8_1full176_1G|HSLV_ECOLI|ATP-dependent protease subunit HslV_P1
HSPQ_ECOLI	full	1	105	11787.9	0	Unmodified	P0AB20_1full105_1G_P1_1T	11787.9	2	P0AB20_1full105_1G|HSPQ_ECOLI|Heat shock protein HspQ_P1
HSRA_ECOLI	full	1	475	51686.9	0	Unmodified	P31474_1full475_1G_P1_1T	51686.9	11	P31474_1full475_1G|HSRA_ECOLI|Probable transport protein HsrA_P1
HTGA_ECOLI	full	1	196	22228.8	0	Unmodified	P28697_1full196_1G_P1_1T	22228.8	6	P28697_1full196_1G|HTGA_ECOLI|Putative uncharacterized protein HtgA_P1
HTPG_ECOLI	full	1	624	71747	0	Unmodified	P0A6Z3_1full624_1G_P1_1T	71747	46	P0A6Z3_1full624_1G|HTPG_ECOLI|Chaperone protein HtpG_P1
HTPX_ECOLI	full	1	293	32023.7	0	Unmodified	P23894_1full293_1G_P1_1T	32023.7	8	P23894_1full293_1G|HTPX_ECOLI|Protease HtpX_P1
HTRC_ECOLI	full	1	179	21368.1	0	Unmodified	P27375_1full179_1G_P1_1T	21368.1	17	P27375_1full179_1G|HTRC_ECOLI|Heat shock protein C_P1
HTRE_ECOLI	signal-peptide	1	29	3546.7	0	Unmodified	P33129_1frag29_1G_P1_1T	3546.7	1	P33129_1frag29_1G|HTRE_ECOLI|Outer membrane usher protein HtrE_P1
HTRE_ECOLI	chain	30	865	92486.4	0	Unmodified	P33129_30frag865_1G_P1_1T	92486.4	28	P33129_30frag865_1G|HTRE_ECOLI|Outer membrane usher protein HtrE_P1
HTRE_ECOLI	full	1	865	96015.1	0	Unmodified	P33129_1full865_1G_P1_1T	96015.1	29	P33129_1full865_1G|HTRE_ECOLI|Outer membrane usher protein HtrE_P1
HTRL_ECOLI	full	1	285	33881	0	Unmodified	P25666_1full285_1G_P1_1T	33881	27	P25666_1full285_1G|HTRL_ECOLI|Protein HtrL_P1
HYAD_ECOLI	full	1	195	21662.8	0	Unmodified	P19930_1full195_1G_P1_1T	21662.8	2	P19930_1full195_1G|HYAD_ECOLI|Hydrogenase 1 maturation protease_P1
HYAE_ECOLI	full	1	132	14888.5	0	Unmodified	P19931_1full132_1G_P1_1T	14888.5	1	P19931_1full132_1G|HYAE_ECOLI|Hydrogenase-1 operon protein HyaE_P1
HYAF_ECOLI	full	1	285	31891.1	0	Unmodified	P19932_1full285_1G_P1_1T	31891.1	3	P19932_1full285_1G|HYAF_ECOLI|Hydrogenase-1 operon protein HyaF_P1
HYBA_ECOLI	signal-peptide	1	27	2820.47	0	Unmodified	P0AAJ8_1frag27_1G_P1_1T	2820.47	1	P0AAJ8_1frag27_1G|HYBA_ECOLI|Hydrogenase-2 operon protein HybA_P1
HYBA_ECOLI	chain	28	328	34330.8	0	Unmodified	P0AAJ8_28frag328_1G_P1_1T	34330.8	22	P0AAJ8_28frag328_1G|HYBA_ECOLI|Hydrogenase-2 operon protein HybA_P1
HYBA_ECOLI	full	1	328	37133.3	0	Unmodified	P0AAJ8_1full328_1G_P1_1T	37133.3	23	P0AAJ8_1full328_1G|HYBA_ECOLI|Hydrogenase-2 operon protein HybA_P1
HYBB_ECOLI	full	1	392	43954.5	0	Unmodified	P37180_1full392_1G_P1_1T	43954.5	12	P37180_1full392_1G|HYBB_ECOLI|Probable Ni/Fe-hydrogenase 2 b-type cytochrome subunit_P1
HYBD_ECOLI	full	1	164	17779.6	0	Unmodified	P37182_1full164_1G_P1_1T	17779.6	5	P37182_1full164_1G|HYBD_ECOLI|Hydrogenase 2 maturation protease_P1
HYBE_ECOLI	full	1	162	18147	0	Unmodified	P0AAN1_1full162_1G_P1_1T	18147	3	P0AAN1_1full162_1G|HYBE_ECOLI|Hydrogenase-2 operon protein HybE_P1
HYBF_ECOLI	full	1	113	13169.4	0	Unmodified	P0A703_1full113_1G_P1_1T	13169.4	3	P0A703_1full113_1G|HYBF_ECOLI|Probable hydrogenase nickel incorporation protein HybF_P1
HYBG_ECOLI	full	1	82	8989.49	0	Unmodified	P0AAM7_1full82_1G_P1_1T	8989.49	2	P0AAM7_1full82_1G|HYBG_ECOLI|Hydrogenase-2 operon protein HybG_P1
HYCA_ECOLI	full	1	153	17851	0	Unmodified	P0AEV4_1full153_1G_P1_1T	17851	8	P0AEV4_1full153_1G|HYCA_ECOLI|Formate hydrogenlyase regulatory protein HycA_P1
HYCB_ECOLI	full	1	203	22835.2	0	Unmodified	P0AAK1_1full203_1G_P1_1T	22835.2	8	P0AAK1_1full203_1G|HYCB_ECOLI|Formate hydrogenlyase subunit 2_P1
HYCC_ECOLI	full	1	608	64912.2	0	Unmodified	P16429_1full608_1G_P1_1T	64912.2	17	P16429_1full608_1G|HYCC_ECOLI|Formate hydrogenlyase subunit 3_P1
HYCD_ECOLI	full	1	307	33162	0	Unmodified	P16430_1full307_1G_P1_1T	33162	5	P16430_1full307_1G|HYCD_ECOLI|Formate hydrogenlyase subunit 4_P1
HYCE_ECOLI	propeptide	538	569	3903.29	0	Unmodified	P16431_538frag569_1G_P1_1T	3903.29	7	P16431_538frag569_1G|HYCE_ECOLI|Formate hydrogenlyase subunit 5_P1
HYCE_ECOLI	chain	1	537	61702	0	Unmodified	P16431_1frag537_1G_P1_1T	61702	17	P16431_1frag537_1G|HYCE_ECOLI|Formate hydrogenlyase subunit 5_P1
HYCE_ECOLI	full	1	569	65587.3	0	Unmodified	P16431_1full569_1G_P1_1T	65587.3	24	P16431_1full569_1G|HYCE_ECOLI|Formate hydrogenlyase subunit 5_P1
HYCF_ECOLI	full	1	180	21198.4	0	Unmodified	P16432_1full180_1G_P1_1T	21198.4	13	P16432_1full180_1G|HYCF_ECOLI|Formate hydrogenlyase subunit 6_P1
HYCG_ECOLI	full	1	255	28452.5	0	Unmodified	P16433_1full255_1G_P1_1T	28452.5	9	P16433_1full255_1G|HYCG_ECOLI|Formate hydrogenlyase subunit 7_P1
HYCH_ECOLI	full	1	136	15608.8	0	Unmodified	P0AEV7_1full136_1G_P1_1T	15608.8	5	P0AEV7_1full136_1G|HYCH_ECOLI|Formate hydrogenlyase maturation protein HycH_P1
HYCI_ECOLI	chain	2	156	17060.4	0	Unmodified	P0AEV9_2frag156_1G_P1_1T	17060.4	4	P0AEV9_2frag156_1G|HYCI_ECOLI|Hydrogenase 3 maturation protease_P1
HYCI_ECOLI	full	1	156	17191.5	0	Unmodified	P0AEV9_1full156_1G_P1_1T	17191.5	4	P0AEV9_1full156_1G|HYCI_ECOLI|Hydrogenase 3 maturation protease_P1
HYDN_ECOLI	full	1	175	20103.7	0	Unmodified	P0AAK4_1full175_1G_P1_1T	20103.7	8	P0AAK4_1full175_1G|HYDN_ECOLI|Electron transport protein HydN_P1
HYFA_ECOLI	full	1	205	23108.2	0	Unmodified	P23481_1full205_1G_P1_1T	23108.2	7	P23481_1full205_1G|HYFA_ECOLI|Hydrogenase-4 component A_P1
HYFB_ECOLI	full	1	672	73160.2	0	Unmodified	P23482_1full672_1G_P1_1T	73160.2	14	P23482_1full672_1G|HYFB_ECOLI|Hydrogenase-4 component B_P1
HYFC_ECOLI	full	1	315	34612.8	0	Unmodified	P77858_1full315_1G_P1_1T	34612.8	6	P77858_1full315_1G|HYFC_ECOLI|Hydrogenase-4 component C_P1
HYFD_ECOLI	full	1	479	52029	0	Unmodified	P77416_1full479_1G_P1_1T	52029	10	P77416_1full479_1G|HYFD_ECOLI|Hydrogenase-4 component D_P1
HYFE_ECOLI	full	1	216	23744	0	Unmodified	P0AEW1_1full216_1G_P1_1T	23744	7	P0AEW1_1full216_1G|HYFE_ECOLI|Hydrogenase-4 component E_P1
HYFF_ECOLI	full	1	526	57266	0	Unmodified	P77437_1full526_1G_P1_1T	57266	10	P77437_1full526_1G|HYFF_ECOLI|Hydrogenase-4 component F_P1
HYFG_ECOLI	full	1	555	63886.5	0	Unmodified	P77329_1full555_1G_P1_1T	63886.5	18	P77329_1full555_1G|HYFG_ECOLI|Hydrogenase-4 component G_P1
HYFH_ECOLI	full	1	181	20951.4	0	Unmodified	P77423_1full181_1G_P1_1T	20951.4	8	P77423_1full181_1G|HYFH_ECOLI|Hydrogenase-4 component H_P1
HYFI_ECOLI	full	1	252	28522.6	0	Unmodified	P77668_1full252_1G_P1_1T	28522.6	5	P77668_1full252_1G|HYFI_ECOLI|Hydrogenase-4 component I_P1
HYFJ_ECOLI	full	1	137	15769.9	0	Unmodified	P77453_1full137_1G_P1_1T	15769.9	4	P77453_1full137_1G|HYFJ_ECOLI|Hydrogenase-4 component J_P1
HYFR_ECOLI	full	1	670	75891.3	0	Unmodified	P71229_1full670_1G_P1_1T	75891.3	15	P71229_1full670_1G|HYFR_ECOLI|DNA-binding transcriptional activator HyfR_P1
HYI_ECOLI	full	1	258	29796.7	0	Unmodified	P30147_1full258_1G_P1_1T	29796.7	12	P30147_1full258_1G|HYI_ECOLI|Hydroxypyruvate isomerase_P1
HYPA_ECOLI	full	1	116	13761.7	0	Unmodified	P0A700_1full116_1G_P1_1T	13761.7	4	P0A700_1full116_1G|HYPA_ECOLI|Protein HypA_P1
HYPB_ECOLI	full	1	290	32170.2	0	Unmodified	P0AAN3_1full290_1G_P1_1T	32170.2	14	P0AAN3_1full290_1G|HYPB_ECOLI|Hydrogenase isoenzymes nickel incorporation protein HypB_P1
HYPC_ECOLI	full	1	90	9912.84	0	Unmodified	P0AAM3_1full90_1G_P1_1T	9912.84	2	P0AAM3_1full90_1G|HYPC_ECOLI|Hydrogenase isoenzymes formation protein HypC_P1
HYPD_ECOLI	full	1	373	42158	0	Unmodified	P24192_1full373_1G_P1_1T	42158	10	P24192_1full373_1G|HYPD_ECOLI|Hydrogenase isoenzymes formation protein HypD_P1
HYPE_ECOLI	full	1	336	35549.6	0	Unmodified	P24193_1full336_1G_P1_1T	35549.6	10	P24193_1full336_1G|HYPE_ECOLI|Hydrogenase isoenzymes formation protein HypE_P1
HYPF_ECOLI	full	1	750	83493.9	0	Unmodified	P30131_1full750_1G_P1_1T	83493.9	14	P30131_1full750_1G|HYPF_ECOLI|Carbamoyltransferase HypF_P1
IAAA_ECOLI	chain	179	321	14605.2	0	Unmodified	P37595_179frag321_1G_P1_1T	14605.2	3	P37595_179frag321_1G|IAAA_ECOLI|Isoaspartyl peptidase_P1
IAAA_ECOLI	chain	2	178	19011.7	0	Unmodified	P37595_2frag178_1G_P1_1T	19011.7	6	P37595_2frag178_1G|IAAA_ECOLI|Isoaspartyl peptidase_P1
IAAA_ECOLI	full	1	321	33729.9	0	Unmodified	P37595_1full321_1G_P1_1T	33729.9	9	P37595_1full321_1G|IAAA_ECOLI|Isoaspartyl peptidase_P1
IADA_ECOLI	full	1	390	41520.6	0	Unmodified	P39377_1full390_1G_P1_1T	41520.6	15	P39377_1full390_1G|IADA_ECOLI|Isoaspartyl dipeptidase_P1
IAP_ECOLI	signal-peptide	1	24	2650.44	0	Unmodified	P10423_1frag24_1G_P1_1T	2650.44	0	P10423_1frag24_1G|IAP_ECOLI|Alkaline phosphatase isozyme conversion protein_P1
IAP_ECOLI	chain	25	345	35644.3	0	Unmodified	P10423_25frag345_1G_P1_1T	35644.3	19	P10423_25frag345_1G|IAP_ECOLI|Alkaline phosphatase isozyme conversion protein_P1
IAP_ECOLI	full	1	345	38276.7	0	Unmodified	P10423_1full345_1G_P1_1T	38276.7	19	P10423_1full345_1G|IAP_ECOLI|Alkaline phosphatase isozyme conversion protein_P1
IBAG_ECOLI	full	1	84	9477.79	0	Unmodified	P0A9W6_1full84_1G_P1_1T	9477.79	4	P0A9W6_1full84_1G|IBAG_ECOLI|Acid stress protein IbaG_P1
IBPA_ECOLI	full	1	137	15804.2	0	Unmodified	P0C054_1full137_1G_P1_1T	15804.2	5	P0C054_1full137_1G|IBPA_ECOLI|Small heat shock protein IbpA_P1
IBPB_ECOLI	full	1	142	16131.3	0	Unmodified	P0C058_1full142_1G_P1_1T	16131.3	6	P0C058_1full142_1G|IBPB_ECOLI|Small heat shock protein IbpB_P1
IBSA_ECOLI	full	1	19	2238.31	0	Unmodified	C1P607_1full19_1G_P1_1T	2238.31	1	C1P607_1full19_1G|IBSA_ECOLI|Small toxic protein IbsA_P1
IBSB_ECOLI	full	1	18	2070.25	0	Unmodified	C1P608_1full18_1G_P1_1T	2070.25	1	C1P608_1full18_1G|IBSB_ECOLI|Small toxic protein IbsB_P1
IBSC_ECOLI	full	1	19	2207.32	0	Unmodified	C1P615_1full19_1G_P1_1T	2207.32	0	C1P615_1full19_1G|IBSC_ECOLI|Small toxic protein IbsC_P1
IBSD_ECOLI	full	1	19	2157.32	0	Unmodified	C1P616_1full19_1G_P1_1T	2157.32	1	C1P616_1full19_1G|IBSD_ECOLI|Small toxic protein IbsD_P1
IBSE_ECOLI	full	1	19	2213.34	0	Unmodified	C1P617_1full19_1G_P1_1T	2213.34	1	C1P617_1full19_1G|IBSE_ECOLI|Small toxic protein IbsE_P1
ICLR_ECOLI	full	1	274	29979.6	0	Unmodified	P16528_1full274_1G_P1_1T	29979.6	11	P16528_1full274_1G|ICLR_ECOLI|Transcriptional repressor IclR_P1
IDH_ECOLI	full	1	416	46318	0	Unmodified	P08200_1full416_1G_P1_1T	46318	31	P08200_1full416_1G|IDH_ECOLI|Isocitrate dehydrogenase [NADP]_P1
IDI_ECOLI	full	1	182	20771.4	0	Unmodified	Q46822_1full182_1G_P1_1T	20771.4	6	Q46822_1full182_1G|IDI_ECOLI|Isopentenyl-diphosphate Delta-isomerase_P1
IDND_ECOLI	full	1	343	37844.8	0	Unmodified	P39346_1full343_1G_P1_1T	37844.8	19	P39346_1full343_1G|IDND_ECOLI|L-idonate 5-dehydrogenase (NAD(P)(+))_P1
IDNK_ECOLI	full	1	187	21315	0	Unmodified	P39208_1full187_1G_P1_1T	21315	12	P39208_1full187_1G|IDNK_ECOLI|Thermosensitive gluconokinase_P1
IDNO_ECOLI	full	1	254	27820.5	0	Unmodified	P0A9P9_1full254_1G_P1_1T	27820.5	13	P0A9P9_1full254_1G|IDNO_ECOLI|Gluconate 5-dehydrogenase_P1
IDNR_ECOLI	full	1	332	37867.3	0	Unmodified	P39343_1full332_1G_P1_1T	37867.3	12	P39343_1full332_1G|IDNR_ECOLI|HTH-type transcriptional regulator IdnR_P1
IDNT_ECOLI	full	1	439	46254.4	0	Unmodified	P39344_1full439_1G_P1_1T	46254.4	9	P39344_1full439_1G|IDNT_ECOLI|Gnt-II system L-idonate transporter_P1
IF1_ECOLI	chain	2	72	8153.35	0	Unmodified	P69222_2frag72_1G_P1_1T	8153.35	5	P69222_2frag72_1G|IF1_ECOLI|Translation initiation factor IF-1_P1
IF1_ECOLI	full	1	72	8284.39	0	Unmodified	P69222_1full72_1G_P1_1T	8284.39	5	P69222_1full72_1G|IF1_ECOLI|Translation initiation factor IF-1_P1
IF2_ECOLI	full	1	890	97990.3	0	Unmodified	P0A705_1full890_1G_P1_1T	97990.3	66	P0A705_1full890_1G|IF2_ECOLI|Translation initiation factor IF-2_P1
IF3_ECOLI	chain	7	180	20103	0	Unmodified	P0A707_7frag180_1G_P1_1T	20103	19	P0A707_7frag180_1G|IF3_ECOLI|Translation initiation factor IF-3_P1
IF3_ECOLI	chain	2	180	20645.3	0	Unmodified	P0A707_2frag180_1G_P1_1T	20645.3	21	P0A707_2frag180_1G|IF3_ECOLI|Translation initiation factor IF-3_P1
IF3_ECOLI	full	1	180	20776.4	0	Unmodified	P0A707_1full180_1G_P1_1T	20776.4	21	P0A707_1full180_1G|IF3_ECOLI|Translation initiation factor IF-3_P1
IGAA_ECOLI	full	1	711	80064.3	0	Unmodified	P45800_1full711_1G_P1_1T	80064.3	21	P45800_1full711_1G|IGAA_ECOLI|Putative membrane protein IgaA homolog_P1
IHFA_ECOLI	chain	2	99	11296.1	0	Unmodified	P0A6X7_2frag99_1G_P1_1T	11296.1	10	P0A6X7_2frag99_1G|IHFA_ECOLI|Integration host factor subunit alpha_P1
IHFA_ECOLI	full	1	99	11427.1	0	Unmodified	P0A6X7_1full99_1G_P1_1T	11427.1	10	P0A6X7_1full99_1G|IHFA_ECOLI|Integration host factor subunit alpha_P1
IHFB_ECOLI	full	1	94	10708.6	0	Unmodified	P0A6Y1_1full94_1G_P1_1T	10708.6	8	P0A6Y1_1full94_1G|IHFB_ECOLI|Integration host factor subunit beta_P1
ILVA_ECOLI	full	1	514	56727.2	0	Unmodified	P04968_1full514_1G_P1_1T	56727.2	21	P04968_1full514_1G|ILVA_ECOLI|L-threonine dehydratase biosynthetic IlvA_P1
ILVB_ECOLI	full	1	562	61059.2	0	Unmodified	P08142_1full562_1G_P1_1T	61059.2	18	P08142_1full562_1G|ILVB_ECOLI|Acetolactate synthase isozyme 1 large subunit_P1
ILVC_ECOLI	chain	2	491	54509.8	0	Unmodified	P05793_2frag491_1G_P1_1T	54509.8	33	P05793_2frag491_1G|ILVC_ECOLI|Ketol-acid reductoisomerase (NADP(+))_P1
ILVC_ECOLI	full	1	491	54640.9	0	Unmodified	P05793_1full491_1G_P1_1T	54640.9	33	P05793_1full491_1G|ILVC_ECOLI|Ketol-acid reductoisomerase (NADP(+))_P1
ILVD_ECOLI	chain	2	616	66299.5	0	Unmodified	P05791_2frag616_1G_P1_1T	66299.5	32	P05791_2frag616_1G|ILVD_ECOLI|Dihydroxy-acid dehydratase_P1
ILVD_ECOLI	full	1	616	66430.6	0	Unmodified	P05791_1full616_1G_P1_1T	66430.6	32	P05791_1full616_1G|ILVD_ECOLI|Dihydroxy-acid dehydratase_P1
ILVE_ECOLI	chain	2	309	34208.3	0	Unmodified	P0AB80_2frag309_1G_P1_1T	34208.3	12	P0AB80_2frag309_1G|ILVE_ECOLI|Branched-chain-amino-acid aminotransferase_P1
ILVE_ECOLI	full	1	309	34339.4	0	Unmodified	P0AB80_1full309_1G_P1_1T	34339.4	12	P0AB80_1full309_1G|ILVE_ECOLI|Branched-chain-amino-acid aminotransferase_P1
ILVG_ECOLI	full	1	548	59896.2	0	Unmodified	P00892_1full548_1G_P1_1T	59896.2	17	P00892_1full548_1G|ILVG_ECOLI|Acetolactate synthase isozyme 2 large subunit_P1
ILVH_ECOLI	full	1	163	18029.8	0	Unmodified	P00894_1full163_1G_P1_1T	18029.8	8	P00894_1full163_1G|ILVH_ECOLI|Acetolactate synthase isozyme 3 small subunit_P1
ILVI_ECOLI	full	1	574	63470.4	0	Unmodified	P00893_1full574_1G_P1_1T	63470.4	23	P00893_1full574_1G|ILVI_ECOLI|Acetolactate synthase isozyme 3 large subunit_P1
ILVM_ECOLI	full	1	87	9819	0	Unmodified	P0ADG1_1full87_1G_P1_1T	9819	1	P0ADG1_1full87_1G|ILVM_ECOLI|Acetolactate synthase isozyme 2 small subunit_P1
ILVN_ECOLI	full	1	96	11244.7	0	Unmodified	P0ADF8_1full96_1G_P1_1T	11244.7	4	P0ADF8_1full96_1G|ILVN_ECOLI|Acetolactate synthase isozyme 1 small subunit_P1
ILVX_ECOLI	full	1	16	1973.91	0	Unmodified	C1P619_1full16_1G_P1_1T	1973.91	1	C1P619_1full16_1G|ILVX_ECOLI|Uncharacterized protein IlvX_P1
ILVY_ECOLI	full	1	297	33499.5	0	Unmodified	P05827_1full297_1G_P1_1T	33499.5	11	P05827_1full297_1G|ILVY_ECOLI|HTH-type transcriptional regulator IlvY_P1
IMDH_ECOLI	full	1	488	52467.5	0	Unmodified	P0ADG7_1full488_1G_P1_1T	52467.5	24	P0ADG7_1full488_1G|IMDH_ECOLI|Inosine-5'-monophosphate dehydrogenase_P1
INAA_ECOLI	full	1	216	25579.2	0	Unmodified	P27294_1full216_1G_P1_1T	25579.2	16	P27294_1full216_1G|INAA_ECOLI|Protein InaA_P1
INGK_ECOLI	full	1	434	48985.5	0	Unmodified	P0AEW6_1full434_1G_P1_1T	48985.5	21	P0AEW6_1full434_1G|INGK_ECOLI|Inosine-guanosine kinase_P1
INH11_ECOLI	full	1	338	39511.4	0	Unmodified	P0CE58_1full338_9G_P1_1T	39511.4	19	P0CE58_1full338_9G|INH11_ECOLI|Transposase InsH for insertion sequence element IS5T_P1
INSA1_ECOLI	full	1	91	10179	0	Unmodified	P0CF07_1full91_3G_P1_1T	10179	4	P0CF07_1full91_3G|INSA1_ECOLI|Insertion element IS1 1 protein InsA_P1
INSA3_ECOLI	full	1	91	10213	0	Unmodified	P0CF09_1full91_3G_P1_1T	10213	4	P0CF09_1full91_3G|INSA3_ECOLI|Insertion element IS1 3 protein InsA_P1
INSA7_ECOLI	full	1	91	10243.2	0	Unmodified	P19767_1full91_1G_P1_1T	10243.2	5	P19767_1full91_1G|INSA7_ECOLI|Insertion element IS1 7 protein InsA_P1
INSB2_ECOLI	full	1	167	19890.5	0	Unmodified	P0CF26_1full167_2G_P1_1T	19890.5	11	P0CF26_1full167_2G|INSB2_ECOLI|Insertion element IS1 2 protein InsB_P1
INSB4_ECOLI	full	1	167	19832.5	0	Unmodified	P57998_1full167_1G_P1_1T	19832.5	11	P57998_1full167_1G|INSB4_ECOLI|Insertion element IS1 4 protein InsB_P1
INSB6_ECOLI	full	1	167	19697.4	0	Unmodified	P0CF29_1full167_3G_P1_1T	19697.4	11	P0CF29_1full167_3G|INSB6_ECOLI|Insertion element IS1 6 protein InsB_P1
INSC2_ECOLI	full	1	121	13523.3	0	Unmodified	P0CF41_1full121_6G_P1_1T	13523.3	10	P0CF41_1full121_6G|INSC2_ECOLI|Transposase InsC for insertion element IS2D_P1
INSD2_ECOLI	full	1	301	34961.7	0	Unmodified	P0CF54_1full301_6G_P1_1T	34961.7	9	P0CF54_1full301_6G|INSD2_ECOLI|Transposase InsD for insertion element IS2D_P1
INSD8_ECOLI	full	1	218	25236.5	0	Unmodified	P0CF60_1full218_1G_P1_1T	25236.5	9	P0CF60_1full218_1G|INSD8_ECOLI|Putative transposase InsD for insertion element IS2E_P1
INSE3_ECOLI	full	1	99	11616.3	0	Unmodified	P0CF68_1full99_5G_P1_1T	11616.3	10	P0CF68_1full99_5G|INSE3_ECOLI|Transposase InsE for insertion sequence IS3C_P1
INSF5_ECOLI	full	1	288	34250.2	0	Unmodified	P0CF83_1full288_5G_P1_1T	34250.2	13	P0CF83_1full288_5G|INSF5_ECOLI|Transposase InsF for insertion sequence IS3E_P1
INSG_ECOLI	full	1	442	50895.6	0	Unmodified	P03835_1full442_1G_P1_1T	50895.6	25	P03835_1full442_1G|INSG_ECOLI|Transposase InsG for insertion sequence element IS4_P1
INSH5_ECOLI	full	1	326	37970.6	0	Unmodified	P76071_1full326_1G_P1_1T	37970.6	20	P76071_1full326_1G|INSH5_ECOLI|Transposase InsH for insertion sequence element IS5Y_P1
INSH6_ECOLI	full	1	338	39392.3	0	Unmodified	P0CE53_1full338_1G_P1_1T	39392.3	20	P0CE53_1full338_1G|INSH6_ECOLI|Transposase InsH for insertion sequence element IS5H_P1
INSI1_ECOLI	full	1	383	44635.1	0	Unmodified	P0CF88_1full383_1G_P1_1T	44635.1	28	P0CF88_1full383_1G|INSI1_ECOLI|Transposase InsI for insertion sequence element IS30A_P1
INSI4_ECOLI	full	1	383	44649.2	0	Unmodified	P0CF90_1full383_2G_P1_1T	44649.2	28	P0CF90_1full383_2G|INSI4_ECOLI|Transposase InsI for insertion sequence element IS30D_P1
INSJ_ECOLI	full	1	173	19865	0	Unmodified	P19768_1full173_1G_P1_1T	19865	19	P19768_1full173_1G|INSJ_ECOLI|Insertion element IS150 uncharacterized 19.7 kDa protein_P1
INSK_ECOLI	full	1	283	33811.7	0	Unmodified	P19769_1full283_1G_P1_1T	33811.7	23	P19769_1full283_1G|INSK_ECOLI|Putative transposase InsK for insertion sequence element IS150_P1
INSL3_ECOLI	full	1	370	41288.6	0	Unmodified	P0CF93_1full370_3G_P1_1T	41288.6	15	P0CF93_1full370_3G|INSL3_ECOLI|Putative transposase InsL for insertion sequence element IS186C_P1
INSN1_ECOLI	full	1	134	15507	0	Unmodified	P75679_1full134_1G_P1_1T	15507	12	P75679_1full134_1G|INSN1_ECOLI|Transposase InsN for insertion sequence element IS911A_P1
INSN2_ECOLI	full	1	100	11704.4	0	Unmodified	P39212_1full100_1G_P1_1T	11704.4	12	P39212_1full100_1G|INSN2_ECOLI|Transposase InsN for insertion sequence element IS911B_P1
INSO1_ECOLI	full	1	141	16165.1	0	Unmodified	P75680_1full141_1G_P1_1T	16165.1	5	P75680_1full141_1G|INSO1_ECOLI|Putative transposase InsO for insertion sequence element IS911A_P1
INSO2_ECOLI	full	1	198	22558.6	0	Unmodified	Q47718_1full198_1G_P1_1T	22558.6	10	Q47718_1full198_1G|INSO2_ECOLI|Putative transposase InsO for insertion sequence element IS911B_P1
INSQ_ECOLI	full	1	382	44041	0	Unmodified	P76102_1full382_1G_P1_1T	44041	31	P76102_1full382_1G|INSQ_ECOLI|Putative transposase InsQ for insertion sequence element IS609_P1
INTA_ECOLI	full	1	413	46976.8	0	Unmodified	P32053_1full413_1G_P1_1T	46976.8	30	P32053_1full413_1G|INTA_ECOLI|Prophage integrase IntA_P1
INTB_ECOLI	full	1	396	45933.1	0	Unmodified	P39347_1full396_1G_P1_1T	45933.1	26	P39347_1full396_1G|INTB_ECOLI|Putative protein IntB_P1
INTD_ECOLI	full	1	387	45634.5	0	Unmodified	P24218_1full387_1G_P1_1T	45634.5	43	P24218_1full387_1G|INTD_ECOLI|Prophage integrase IntD_P1
INTE_ECOLI	full	1	375	43046	0	Unmodified	P75969_1full375_1G_P1_1T	43046	27	P75969_1full375_1G|INTE_ECOLI|Prophage integrase IntE_P1
INTF_ECOLI	full	1	466	53484.7	0	Unmodified	P71298_1full466_1G_P1_1T	53484.7	34	P71298_1full466_1G|INTF_ECOLI|Prophage integrase IntF_P1
INTG_ECOLI	full	1	92	10790.5	0	Unmodified	P76323_1full92_1G_P1_1T	10790.5	1	P76323_1full92_1G|INTG_ECOLI|Putative protein IntG_P1
INTQ_ECOLI	full	1	398	45815.8	0	Unmodified	P76168_1full398_1G_P1_1T	45815.8	30	P76168_1full398_1G|INTQ_ECOLI|Putative defective protein IntQ_P1
INTR_ECOLI	full	1	411	48107.4	0	Unmodified	P76056_1full411_1G_P1_1T	48107.4	32	P76056_1full411_1G|INTR_ECOLI|Prophage integrase IntR_P1
INTS_ECOLI	full	1	385	44443.7	0	Unmodified	P37326_1full385_1G_P1_1T	44443.7	37	P37326_1full385_1G|INTS_ECOLI|Prophage integrase IntS_P1
INTZ_ECOLI	full	1	402	45618.7	0	Unmodified	P76542_1full402_1G_P1_1T	45618.7	26	P76542_1full402_1G|INTZ_ECOLI|Prophage integrase IntZ_P1
IOJAP_ECOLI	full	1	105	11729	0	Unmodified	P0AAT6_1full105_1G_P1_1T	11729	5	P0AAT6_1full105_1G|IOJAP_ECOLI|Ribosomal silencing factor RsfS_P1
IPRA_ECOLI	full	1	207	24134.7	0	Unmodified	P0AAP5_1full207_1G_P1_1T	24134.7	10	P0AAP5_1full207_1G|IPRA_ECOLI|Inhibitor of hydrogen peroxide resistance_P1
IPYR_ECOLI	chain	2	176	19802.3	0	Unmodified	P0A7A9_2frag176_1G_P1_1T	19802.3	16	P0A7A9_2frag176_1G|IPYR_ECOLI|Inorganic pyrophosphatase_P1
IPYR_ECOLI	full	1	176	19933.3	0	Unmodified	P0A7A9_1full176_1G_P1_1T	19933.3	16	P0A7A9_1full176_1G|IPYR_ECOLI|Inorganic pyrophosphatase_P1
IRAD_ECOLI	full	1	130	14940.5	0	Unmodified	P39375_1full130_1G_P1_1T	14940.5	4	P39375_1full130_1G|IRAD_ECOLI|Anti-adapter protein IraD_P1
IRAM_ECOLI	full	1	107	12498.6	0	Unmodified	P75987_1full107_1G_P1_1T	12498.6	11	P75987_1full107_1G|IRAM_ECOLI|Anti-adapter protein IraM_P1
IRAP_ECOLI	full	1	86	10052.3	0	Unmodified	P0AAN9_1full86_1G_P1_1T	10052.3	8	P0AAN9_1full86_1G|IRAP_ECOLI|Anti-adapter protein IraP_P1
IROK_ECOLI	full	1	21	2336.31	0	Unmodified	U3PVA8_1full21_1G_P1_1T	2336.31	1	U3PVA8_1full21_1G|IROK_ECOLI|Protein IroK_P1
ISCA_ECOLI	full	1	107	11775.9	0	Unmodified	P0AAC8_1full107_1G_P1_1T	11775.9	7	P0AAC8_1full107_1G|ISCA_ECOLI|Iron-binding protein IscA_P1
ISCR_ECOLI	full	1	162	17545.1	0	Unmodified	P0AGK8_1full162_1G_P1_1T	17545.1	6	P0AGK8_1full162_1G|ISCR_ECOLI|HTH-type transcriptional regulator IscR_P1
ISCS_ECOLI	full	1	404	45384.3	0	Unmodified	P0A6B7_1full404_1G_P1_1T	45384.3	19	P0A6B7_1full404_1G|ISCS_ECOLI|Cysteine desulfurase IscS_P1
ISCU_ECOLI	full	1	128	14107.1	0	Unmodified	P0ACD4_1full128_1G_P1_1T	14107.1	12	P0ACD4_1full128_1G|ISCU_ECOLI|Iron-sulfur cluster assembly scaffold protein IscU_P1
ISCX_ECOLI	full	1	66	7807.71	0	Unmodified	P0C0L9_1full66_1G_P1_1T	7807.71	3	P0C0L9_1full66_1G|ISCX_ECOLI|Protein IscX_P1
ISPA_ECOLI	full	1	299	32471.8	0	Unmodified	P22939_1full299_1G_P1_1T	32471.8	13	P22939_1full299_1G|ISPA_ECOLI|Farnesyl diphosphate synthase_P1
ISPB_ECOLI	full	1	323	35437.9	0	Unmodified	P0AD57_1full323_1G_P1_1T	35437.9	9	P0AD57_1full323_1G|ISPB_ECOLI|Octaprenyl diphosphate synthase_P1
ISPD_ECOLI	chain	2	236	25923.4	0	Unmodified	Q46893_2frag236_1G_P1_1T	25923.4	6	Q46893_2frag236_1G|ISPD_ECOLI|2-C-methyl-D-erythritol 4-phosphate cytidylyltransferase_P1
ISPD_ECOLI	full	1	236	26054.4	0	Unmodified	Q46893_1full236_1G_P1_1T	26054.4	6	Q46893_1full236_1G|ISPD_ECOLI|2-C-methyl-D-erythritol 4-phosphate cytidylyltransferase_P1
ISPE_ECOLI	full	1	283	31206.1	0	Unmodified	P62615_1full283_1G_P1_1T	31206.1	9	P62615_1full283_1G|ISPE_ECOLI|4-diphosphocytidyl-2-C-methyl-D-erythritol kinase_P1
ISPF_ECOLI	full	1	159	17073	0	Unmodified	P62617_1full159_1G_P1_1T	17073	9	P62617_1full159_1G|ISPF_ECOLI|2-C-methyl-D-erythritol 2,4-cyclodiphosphate synthase_P1
ISPG_ECOLI	full	1	372	41095.7	0	Unmodified	P62620_1full372_1G_P1_1T	41095.7	19	P62620_1full372_1G|ISPG_ECOLI|4-hydroxy-3-methylbut-2-en-1-yl diphosphate synthase (flavodoxin)_P1
ISPH_ECOLI	full	1	316	35093.2	0	Unmodified	P62623_1full316_1G_P1_1T	35093.2	14	P62623_1full316_1G|ISPH_ECOLI|4-hydroxy-3-methylbut-2-enyl diphosphate reductase_P1
IVY_ECOLI	signal-peptide	1	28	2793.45	0	Unmodified	P0AD59_1frag28_1G_P1_1T	2793.45	1	P0AD59_1frag28_1G|IVY_ECOLI|Inhibitor of vertebrate lysozyme_P1
IVY_ECOLI	chain	29	157	14288.1	0	Unmodified	P0AD59_29frag157_1G_P1_1T	14288.1	10	P0AD59_29frag157_1G|IVY_ECOLI|Inhibitor of vertebrate lysozyme_P1
IVY_ECOLI	full	1	157	17063.5	0	Unmodified	P0AD59_1full157_1G_P1_1T	17063.5	11	P0AD59_1full157_1G|IVY_ECOLI|Inhibitor of vertebrate lysozyme_P1
JAYE_ECOLI	full	1	263	28304.3	0	Unmodified	P75981_1full263_1G_P1_1T	28304.3	4	P75981_1full263_1G|JAYE_ECOLI|Putative protein JayE_P1
K1PF_ECOLI	full	1	312	34058.6	0	Unmodified	P0AEW9_1full312_1G_P1_1T	34058.6	12	P0AEW9_1full312_1G|K1PF_ECOLI|1-phosphofructokinase_P1
KAD_ECOLI	full	1	214	23772.6	0	Unmodified	P69441_1full214_1G_P1_1T	23772.6	18	P69441_1full214_1G|KAD_ECOLI|Adenylate kinase_P1
KATG_ECOLI	full	1	726	80311.6	0	Unmodified	P13029_1full726_1G_P1_1T	80311.6	35	P13029_1full726_1G|KATG_ECOLI|Catalase-peroxidase_P1
KBAY_ECOLI	full	1	286	31663.1	0	Unmodified	P0AB74_1full286_1G_P1_1T	31663.1	13	P0AB74_1full286_1G|KBAY_ECOLI|D-tagatose-1,6-bisphosphate aldolase subunit KbaY_P1
KBAZ_ECOLI	full	1	426	47658.1	0	Unmodified	P0C8K0_1full426_1G_P1_1T	47658.1	12	P0C8K0_1full426_1G|KBAZ_ECOLI|D-tagatose-1,6-bisphosphate aldolase subunit KbaZ_P1
KBL_ECOLI	full	1	398	43560.1	0	Unmodified	P0AB77_1full398_1G_P1_1T	43560.1	16	P0AB77_1full398_1G|KBL_ECOLI|2-amino-3-ketobutyrate coenzyme A ligase_P1
KCH_ECOLI	full	1	417	46364.6	0	Unmodified	P31069_1full417_1G_P1_1T	46364.6	20	P31069_1full417_1G|KCH_ECOLI|Voltage-gated potassium channel Kch_P1
KCY_ECOLI	full	1	227	24844.2	0	Unmodified	P0A6I0_1full227_1G_P1_1T	24844.2	7	P0A6I0_1full227_1G|KCY_ECOLI|Cytidylate kinase_P1
KDGK_ECOLI	full	1	309	34338.4	0	Unmodified	P37647_1full309_1G_P1_1T	34338.4	14	P37647_1full309_1G|KDGK_ECOLI|2-dehydro-3-deoxygluconokinase_P1
KDGL_ECOLI	chain	2	122	13243.1	0	Unmodified	P0ABN1_2frag122_1G_P1_1T	13243.1	3	P0ABN1_2frag122_1G|KDGL_ECOLI|Diacylglycerol kinase_P1
KDGL_ECOLI	full	1	122	13374.2	0	Unmodified	P0ABN1_1full122_1G_P1_1T	13374.2	3	P0ABN1_1full122_1G|KDGL_ECOLI|Diacylglycerol kinase_P1
KDGR_ECOLI	full	1	263	30163.7	0	Unmodified	P76268_1full263_1G_P1_1T	30163.7	12	P76268_1full263_1G|KDGR_ECOLI|Transcriptional regulator KdgR_P1
KDGT_ECOLI	full	1	327	33873.5	0	Unmodified	P0A712_1full327_1G_P1_1T	33873.5	14	P0A712_1full327_1G|KDGT_ECOLI|2-keto-3-deoxygluconate permease_P1
KDPA_ECOLI	full	1	557	59556.2	0	Unmodified	P03959_1full557_1G_P1_1T	59556.2	8	P03959_1full557_1G|KDPA_ECOLI|Potassium-transporting ATPase potassium-binding subunit_P1
KDPB_ECOLI	full	1	682	72744	0	Unmodified	P03960_1full682_1G_P1_1T	72744	31	P03960_1full682_1G|KDPB_ECOLI|Potassium-transporting ATPase ATP-binding subunit_P1
KDPC_ECOLI	full	1	190	20294.7	0	Unmodified	P03961_1full190_1G_P1_1T	20294.7	5	P03961_1full190_1G|KDPC_ECOLI|Potassium-transporting ATPase KdpC subunit_P1
KDPD_ECOLI	full	1	894	99215.5	0	Unmodified	P21865_1full894_1G_P1_1T	99215.5	27	P21865_1full894_1G|KDPD_ECOLI|Sensor protein KdpD_P1
KDPE_ECOLI	full	1	225	25394.6	0	Unmodified	P21866_1full225_1G_P1_1T	25394.6	6	P21866_1full225_1G|KDPE_ECOLI|KDP operon transcriptional regulatory protein KdpE_P1
KDPF_ECOLI	full	1	29	3069.72	0	Unmodified	P36937_1full29_1G_P1_1T	3069.72	0	P36937_1full29_1G|KDPF_ECOLI|Potassium-transporting ATPase KdpF subunit_P1
KDSA_ECOLI	full	1	284	31217.3	0	Unmodified	P0A715_1full284_1G_P1_1T	31217.3	22	P0A715_1full284_1G|KDSA_ECOLI|2-dehydro-3-deoxyphosphooctonate aldolase_P1
KDSB_ECOLI	chain	2	248	27620.2	0	Unmodified	P04951_2frag248_1G_P1_1T	27620.2	5	P04951_2frag248_1G|KDSB_ECOLI|3-deoxy-manno-octulosonate cytidylyltransferase_P1
KDSB_ECOLI	full	1	248	27751.2	0	Unmodified	P04951_1full248_1G_P1_1T	27751.2	5	P04951_1full248_1G|KDSB_ECOLI|3-deoxy-manno-octulosonate cytidylyltransferase_P1
KDSC_ECOLI	chain	2	188	20161.7	0	Unmodified	P0ABZ4_2frag188_1G_P1_1T	20161.7	10	P0ABZ4_2frag188_1G|KDSC_ECOLI|3-deoxy-D-manno-octulosonate 8-phosphate phosphatase KdsC_P1
KDSC_ECOLI	full	1	188	20292.7	0	Unmodified	P0ABZ4_1full188_1G_P1_1T	20292.7	10	P0ABZ4_1full188_1G|KDSC_ECOLI|3-deoxy-D-manno-octulosonate 8-phosphate phosphatase KdsC_P1
KDSD_ECOLI	full	1	328	35684.4	0	Unmodified	P45395_1full328_1G_P1_1T	35684.4	14	P45395_1full328_1G|KDSD_ECOLI|Arabinose 5-phosphate isomerase KdsD_P1
KDTA_ECOLI	full	1	425	47446.8	0	Unmodified	P0AC75_1full425_1G_P1_1T	47446.8	16	P0AC75_1full425_1G|KDTA_ECOLI|3-deoxy-D-manno-octulosonic acid transferase_P1
KDUD_ECOLI	full	1	253	27231	0	Unmodified	P37769_1full253_1G_P1_1T	27231	8	P37769_1full253_1G|KDUD_ECOLI|2-dehydro-3-deoxy-D-gluconate 5-dehydrogenase_P1
KDUI_ECOLI	full	1	278	31437.5	0	Unmodified	Q46938_1full278_1G_P1_1T	31437.5	12	Q46938_1full278_1G|KDUI_ECOLI|4-deoxy-L-threo-5-hexosulose-uronate ketol-isomerase_P1
KEFB_ECOLI	full	1	601	66602.5	0	Unmodified	P45522_1full601_1G_P1_1T	66602.5	15	P45522_1full601_1G|KEFB_ECOLI|Glutathione-regulated potassium-efflux system protein KefB_P1
KEFC_ECOLI	full	1	620	68116.4	0	Unmodified	P03819_1full620_1G_P1_1T	68116.4	17	P03819_1full620_1G|KEFC_ECOLI|Glutathione-regulated potassium-efflux system protein KefC_P1
KEFF_ECOLI	full	1	176	20368.2	0	Unmodified	P0A754_1full176_1G_P1_1T	20368.2	5	P0A754_1full176_1G|KEFF_ECOLI|Glutathione-regulated potassium-efflux system ancillary protein KefF_P1
KEFG_ECOLI	full	1	184	21090.7	0	Unmodified	P0A756_1full184_1G_P1_1T	21090.7	4	P0A756_1full184_1G|KEFG_ECOLI|Glutathione-regulated potassium-efflux system ancillary protein KefG_P1
KGTP_ECOLI	full	1	432	47524.8	0	Unmodified	P0AEX3_1full432_1G_P1_1T	47524.8	13	P0AEX3_1full432_1G|KGTP_ECOLI|Alpha-ketoglutarate permease_P1
KGUA_ECOLI	full	1	207	23650.2	0	Unmodified	P60546_1full207_1G_P1_1T	23650.2	9	P60546_1full207_1G|KGUA_ECOLI|Guanylate kinase_P1
KHSE_ECOLI	full	1	310	34195.2	0	Unmodified	P00547_1full310_1G_P1_1T	34195.2	10	P00547_1full310_1G|KHSE_ECOLI|Homoserine kinase_P1
KILR_ECOLI	full	1	73	8533.55	0	Unmodified	P38393_1full73_1G_P1_1T	8533.55	6	P38393_1full73_1G|KILR_ECOLI|Killing protein KilR_P1
KITH_ECOLI	full	1	205	23847.9	0	Unmodified	P23331_1full205_1G_P1_1T	23847.9	8	P23331_1full205_1G|KITH_ECOLI|Thymidine kinase_P1
KPPR_ECOLI	full	1	289	32411.7	0	Unmodified	P0AEX5_1full289_1G_P1_1T	32411.7	11	P0AEX5_1full289_1G|KPPR_ECOLI|Probable phosphoribulokinase_P1
KPRS_ECOLI	chain	2	315	34357.9	0	Unmodified	P0A717_2frag315_1G_P1_1T	34357.9	8	P0A717_2frag315_1G|KPRS_ECOLI|Ribose-phosphate pyrophosphokinase_P1
KPRS_ECOLI	full	1	315	34488.9	0	Unmodified	P0A717_1full315_1G_P1_1T	34488.9	8	P0A717_1full315_1G|KPRS_ECOLI|Ribose-phosphate pyrophosphokinase_P1
KPTA_ECOLI	full	1	184	20751	0	Unmodified	P39380_1full184_1G_P1_1T	20751	15	P39380_1full184_1G|KPTA_ECOLI|RNA 2'-phosphotransferase_P1
KPYK1_ECOLI	full	1	470	51311.9	0	Unmodified	P0AD61_1full470_1G_P1_1T	51311.9	34	P0AD61_1full470_1G|KPYK1_ECOLI|Pyruvate kinase I_P1
KPYK2_ECOLI	chain	2	480	51638.1	0	Unmodified	P21599_2frag480_1G_P1_1T	51638.1	27	P21599_2frag480_1G|KPYK2_ECOLI|Pyruvate kinase II_P1
KPYK2_ECOLI	full	1	480	51769.1	0	Unmodified	P21599_1full480_1G_P1_1T	51769.1	27	P21599_1full480_1G|KPYK2_ECOLI|Pyruvate kinase II_P1
KTHY_ECOLI	full	1	213	23840.6	0	Unmodified	P0A720_1full213_1G_P1_1T	23840.6	9	P0A720_1full213_1G|KTHY_ECOLI|Thymidylate kinase_P1
KUP_ECOLI	full	1	622	69605.3	0	Unmodified	P63183_1full622_1G_P1_1T	69605.3	16	P63183_1full622_1G|KUP_ECOLI|Low affinity potassium transport system protein kup_P1
LACI_ECOLI	full	1	360	38825.3	0	Unmodified	P03023_1full360_1G_P1_1T	38825.3	11	P03023_1full360_1G|LACI_ECOLI|Lactose operon repressor_P1
LACY_ECOLI	full	1	417	47024.6	0	Unmodified	P02920_1full417_1G_P1_1T	47024.6	12	P02920_1full417_1G|LACY_ECOLI|Lactose permease_P1
LAFU_ECOLI	full	1	211	23900.5	0	Unmodified	Q47154_1full211_1G_P1_1T	23900.5	17	Q47154_1full211_1G|LAFU_ECOLI|Putative truncated flagellar export/assembly protein LafU_P1
LAMB_ECOLI	signal-peptide	1	25	2551.4	0	Unmodified	P02943_1frag25_1G_P1_1T	2551.4	1	P02943_1frag25_1G|LAMB_ECOLI|Maltoporin_P1
LAMB_ECOLI	chain	26	446	47621.5	0	Unmodified	P02943_26frag446_1G_P1_1T	47621.5	19	P02943_26frag446_1G|LAMB_ECOLI|Maltoporin_P1
LAMB_ECOLI	full	1	446	50154.9	0	Unmodified	P02943_1full446_1G_P1_1T	50154.9	20	P02943_1full446_1G|LAMB_ECOLI|Maltoporin_P1
LAPA_ECOLI	full	1	102	11433.4	0	Unmodified	P0ACV4_1full102_1G_P1_1T	11433.4	4	P0ACV4_1full102_1G|LAPA_ECOLI|Lipopolysaccharide assembly protein A_P1
LAPB_ECOLI	full	1	389	44996.9	0	Unmodified	P0AB58_1full389_1G_P1_1T	44996.9	19	P0AB58_1full389_1G|LAPB_ECOLI|Lipopolysaccharide assembly protein B_P1
LAST_ECOLI	full	1	228	25364.2	0	Unmodified	P37005_1full228_1G_P1_1T	25364.2	8	P37005_1full228_1G|LAST_ECOLI|Uncharacterized tRNA/rRNA methyltransferase LasT_P1
LCFA_ECOLI	full	1	561	62777	0	Unmodified	P69451_1full561_1G_P1_1T	62777	32	P69451_1full561_1G|LCFA_ECOLI|Long-chain-fatty-acid--CoA ligase_P1
LDCA_ECOLI	full	1	304	33863.4	0	Unmodified	P76008_1full304_1G_P1_1T	33863.4	4	P76008_1full304_1G|LDCA_ECOLI|Murein tetrapeptide carboxypeptidase_P1
LDCI_ECOLI	full	1	715	81951.5	0	Unmodified	P0A9H3_1full715_1G_P1_1T	81951.5	43	P0A9H3_1full715_1G|LDCI_ECOLI|Inducible lysine decarboxylase_P1
LDHD_ECOLI	full	1	329	37005.8	0	Unmodified	P52643_1full329_1G_P1_1T	37005.8	19	P52643_1full329_1G|LDHD_ECOLI|D-lactate dehydrogenase_P1
LDRA_ECOLI	full	1	35	4019.17	0	Unmodified	Q6BF86_1full35_1G_P1_1T	4019.17	1	Q6BF86_1full35_1G|LDRA_ECOLI|Small toxic polypeptide LdrA/LdrC_P1
LDRB_ECOLI	full	1	35	3977.12	0	Unmodified	Q6BF87_1full35_1G_P1_1T	3977.12	1	Q6BF87_1full35_1G|LDRB_ECOLI|Small toxic polypeptide LdrB_P1
LDRD_ECOLI	full	1	35	3930.08	0	Unmodified	Q6BF25_1full35_1G_P1_1T	3930.08	2	Q6BF25_1full35_1G|LDRD_ECOLI|Small toxic polypeptide LdrD_P1
LEP_ECOLI	full	1	324	36260.8	0	Unmodified	P00803_1full324_1G_P1_1T	36260.8	19	P00803_1full324_1G|LEP_ECOLI|Signal peptidase I_P1
LEP4_ECOLI	full	1	225	25330.5	0	Unmodified	P25960_1full225_1G_P1_1T	25330.5	6	P25960_1full225_1G|LEP4_ECOLI|Type 4 prepilin-like proteins leader peptide-processing enzyme_P1
LEPA_ECOLI	full	1	599	67395.1	0	Unmodified	P60785_1full599_1G_P1_1T	67395.1	37	P60785_1full599_1G|LEPA_ECOLI|Elongation factor 4_P1
LEU1_ECOLI	chain	2	523	57689.6	0	Unmodified	P09151_2frag523_1G_P1_1T	57689.6	27	P09151_2frag523_1G|LEU1_ECOLI|2-isopropylmalate synthase_P1
LEU1_ECOLI	full	1	523	57820.6	0	Unmodified	P09151_1full523_1G_P1_1T	57820.6	27	P09151_1full523_1G|LEU1_ECOLI|2-isopropylmalate synthase_P1
LEU3_ECOLI	chain	2	363	39807.3	0	Unmodified	P30125_2frag363_1G_P1_1T	39807.3	13	P30125_2frag363_1G|LEU3_ECOLI|3-isopropylmalate dehydrogenase_P1
LEU3_ECOLI	full	1	363	39938.3	0	Unmodified	P30125_1full363_1G_P1_1T	39938.3	13	P30125_1full363_1G|LEU3_ECOLI|3-isopropylmalate dehydrogenase_P1
LEUC_ECOLI	chain	2	466	50432.6	0	Unmodified	P0A6A6_2frag466_1G_P1_1T	50432.6	25	P0A6A6_2frag466_1G|LEUC_ECOLI|3-isopropylmalate dehydratase large subunit_P1
LEUC_ECOLI	full	1	466	50563.6	0	Unmodified	P0A6A6_1full466_1G_P1_1T	50563.6	25	P0A6A6_1full466_1G|LEUC_ECOLI|3-isopropylmalate dehydratase large subunit_P1
LEUD_ECOLI	chain	2	201	22544.4	0	Unmodified	P30126_2frag201_1G_P1_1T	22544.4	11	P30126_2frag201_1G|LEUD_ECOLI|3-isopropylmalate dehydratase small subunit_P1
LEUD_ECOLI	full	1	201	22675.5	0	Unmodified	P30126_1full201_1G_P1_1T	22675.5	11	P30126_1full201_1G|LEUD_ECOLI|3-isopropylmalate dehydratase small subunit_P1
LEUE_ECOLI	full	1	212	23403.8	0	Unmodified	P76249_1full212_1G_P1_1T	23403.8	13	P76249_1full212_1G|LEUE_ECOLI|Leucine efflux protein_P1
LEUO_ECOLI	full	1	314	35988.2	0	Unmodified	P10151_1full314_1G_P1_1T	35988.2	11	P10151_1full314_1G|LEUO_ECOLI|HTH-type transcriptional regulator LeuO_P1
LEXA_ECOLI	full	1	202	22432.1	0	Unmodified	P0A7C2_1full202_1G_P1_1T	22432.1	11	P0A7C2_1full202_1G|LEXA_ECOLI|LexA repressor_P1
LFHA_ECOLI	full	1	579	63354.7	0	Unmodified	Q47153_1full579_1G_P1_1T	63354.7	23	Q47153_1full579_1G|LFHA_ECOLI|Putative truncated flagellar export/assembly protein LfhA_P1
LFTR_ECOLI	full	1	234	26975.4	0	Unmodified	P0A8P1_1full234_1G_P1_1T	26975.4	4	P0A8P1_1full234_1G|LFTR_ECOLI|Leucyl/phenylalanyl-tRNA--protein transferase_P1
LGOD_ECOLI	full	1	340	37009.1	0	Unmodified	P39400_1full340_1G_P1_1T	37009.1	16	P39400_1full340_1G|LGOD_ECOLI|L-galactonate-5-dehydrogenase_P1
LGOR_ECOLI	full	1	304	35609.9	0	Unmodified	P39399_1full304_1G_P1_1T	35609.9	8	P39399_1full304_1G|LGOR_ECOLI|Probable HTH-type transcriptional regulator LgoR_P1
LGOT_ECOLI	full	1	453	50000.9	0	Unmodified	P39398_1full453_1G_P1_1T	50000.9	10	P39398_1full453_1G|LGOT_ECOLI|Probable L-galactonate transporter_P1
LGT_ECOLI	full	1	291	33110.3	0	Unmodified	P60955_1full291_1G_P1_1T	33110.3	3	P60955_1full291_1G|LGT_ECOLI|Prolipoprotein diacylglyceryl transferase_P1
LGUL_ECOLI	full	1	135	15031.7	0	Unmodified	P0AC81_1full135_1G_P1_1T	15031.7	8	P0AC81_1full135_1G|LGUL_ECOLI|Lactoylglutathione lyase_P1
LHGO_ECOLI	full	1	422	46677.9	0	Unmodified	P37339_1full422_1G_P1_1T	46677.9	14	P37339_1full422_1G|LHGO_ECOLI|L-2-hydroxyglutarate oxidase LhgO_P1
LHR_ECOLI	full	1	1538	169884	0	Unmodified	P30015_1full1538_1G_P1_1T	169884	26	P30015_1full1538_1G|LHR_ECOLI|Probable ATP-dependent helicase lhr_P1
LIGB_ECOLI	full	1	560	63665	0	Unmodified	P25772_1full560_1G_P1_1T	63665	30	P25772_1full560_1G|LIGB_ECOLI|DNA ligase B_P1
LIPA_ECOLI	full	1	321	36648.8	0	Unmodified	P60716_1full321_1G_P1_1T	36648.8	18	P60716_1full321_1G|LIPA_ECOLI|Lipoyl synthase_P1
LIPB_ECOLI	full	1	213	24102.5	0	Unmodified	P60720_1full213_1G_P1_1T	24102.5	8	P60720_1full213_1G|LIPB_ECOLI|Octanoyltransferase_P1
LIT_ECOLI	full	1	297	34414.5	0	Unmodified	P11072_1full297_1G_P1_1T	34414.5	20	P11072_1full297_1G|LIT_ECOLI|Cell death peptidase_P1
LIVF_ECOLI	full	1	237	26414.8	0	Unmodified	P22731_1full237_1G_P1_1T	26414.8	8	P22731_1full237_1G|LIVF_ECOLI|High-affinity branched-chain amino acid transport ATP-binding protein LivF_P1
LIVG_ECOLI	full	1	255	28579	0	Unmodified	P0A9S7_1full255_1G_P1_1T	28579	7	P0A9S7_1full255_1G|LIVG_ECOLI|High-affinity branched-chain amino acid transport ATP-binding protein LivG_P1
LIVH_ECOLI	full	1	308	33114.4	0	Unmodified	P0AEX7_1full308_1G_P1_1T	33114.4	5	P0AEX7_1full308_1G|LIVH_ECOLI|High-affinity branched-chain amino acid transport system permease protein LivH_P1
LIVJ_ECOLI	signal-peptide	1	23	2393.3	0	Unmodified	P0AD96_1frag23_1G_P1_1T	2393.3	2	P0AD96_1frag23_1G|LIVJ_ECOLI|Leu/Ile/Val-binding protein_P1
LIVJ_ECOLI	chain	24	367	37096.2	0	Unmodified	P0AD96_24frag367_1G_P1_1T	37096.2	29	P0AD96_24frag367_1G|LIVJ_ECOLI|Leu/Ile/Val-binding protein_P1
LIVJ_ECOLI	full	1	367	39471.5	0	Unmodified	P0AD96_1full367_1G_P1_1T	39471.5	31	P0AD96_1full367_1G|LIVJ_ECOLI|Leu/Ile/Val-binding protein_P1
LIVK_ECOLI	signal-peptide	1	23	2428.35	0	Unmodified	P04816_1frag23_1G_P1_1T	2428.35	2	P04816_1frag23_1G|LIVK_ECOLI|Leucine-specific-binding protein_P1
LIVK_ECOLI	chain	24	369	37274	0	Unmodified	P04816_24frag369_1G_P1_1T	37274	25	P04816_24frag369_1G|LIVK_ECOLI|Leucine-specific-binding protein_P1
LIVK_ECOLI	full	1	369	39684.3	0	Unmodified	P04816_1full369_1G_P1_1T	39684.3	27	P04816_1full369_1G|LIVK_ECOLI|Leucine-specific-binding protein_P1
LIVM_ECOLI	full	1	425	46457.2	0	Unmodified	P22729_1full425_1G_P1_1T	46457.2	13	P22729_1full425_1G|LIVM_ECOLI|High-affinity branched-chain amino acid transport system permease protein LivM_P1
LLDD_ECOLI	full	1	396	42984.2	0	Unmodified	P33232_1full396_1G_P1_1T	42984.2	14	P33232_1full396_1G|LLDD_ECOLI|L-lactate dehydrogenase_P1
LLDP_ECOLI	full	1	551	59559	0	Unmodified	P33231_1full551_1G_P1_1T	59559	18	P33231_1full551_1G|LLDP_ECOLI|L-lactate permease_P1
LLDR_ECOLI	full	1	258	29285	0	Unmodified	P0ACL7_1full258_1G_P1_1T	29285	10	P0ACL7_1full258_1G|LLDR_ECOLI|Putative L-lactate dehydrogenase operon regulatory protein_P1
LNT_ECOLI	full	1	512	57312.5	0	Unmodified	P23930_1full512_1G_P1_1T	57312.5	14	P23930_1full512_1G|LNT_ECOLI|Apolipoprotein N-acyltransferase_P1
LOIP_ECOLI	signal-peptide	1	18	1881.1	0	Unmodified	P25894_1frag18_1G_P1_1T	1881.1	1	P25894_1frag18_1G|LOIP_ECOLI|Metalloprotease LoiP_P1
LOIP_ECOLI	chain	19	252	25229.3	0	Unmodified	P25894_19frag252_1G_P1_1T	25229.3	11	P25894_19frag252_1G|LOIP_ECOLI|Metalloprotease LoiP_P1
LOIP_ECOLI	full	1	252	27092.4	0	Unmodified	P25894_1full252_1G_P1_1T	27092.4	12	P25894_1full252_1G|LOIP_ECOLI|Metalloprotease LoiP_P1
LOLA_ECOLI	signal-peptide	1	21	2264.26	0	Unmodified	P61316_1frag21_1G_P1_1T	2264.26	2	P61316_1frag21_1G|LOLA_ECOLI|Outer-membrane lipoprotein carrier protein_P1
LOLA_ECOLI	chain	22	203	20406.1	0	Unmodified	P61316_22frag203_1G_P1_1T	20406.1	12	P61316_22frag203_1G|LOLA_ECOLI|Outer-membrane lipoprotein carrier protein_P1
LOLA_ECOLI	full	1	203	22652.4	0	Unmodified	P61316_1full203_1G_P1_1T	22652.4	14	P61316_1full203_1G|LOLA_ECOLI|Outer-membrane lipoprotein carrier protein_P1
LOLB_ECOLI	signal-peptide	1	21	2332.41	0	Unmodified	P61320_1frag21_1G_P1_1T	2332.41	0	P61320_1frag21_1G|LOLB_ECOLI|Outer-membrane lipoprotein LolB_P1
LOLB_ECOLI	chain	22	207	21374.8	0	Unmodified	P61320_22frag207_1G_P1_1T	21374.8	12	P61320_22frag207_1G|LOLB_ECOLI|Outer-membrane lipoprotein LolB_P1
LOLB_ECOLI	full	1	207	23689.2	0	Unmodified	P61320_1full207_1G_P1_1T	23689.2	12	P61320_1full207_1G|LOLB_ECOLI|Outer-membrane lipoprotein LolB_P1
LOLC_ECOLI	full	1	399	43316.1	0	Unmodified	P0ADC3_1full399_1G_P1_1T	43316.1	10	P0ADC3_1full399_1G|LOLC_ECOLI|Lipoprotein-releasing system transmembrane protein LolC_P1
LOLD_ECOLI	full	1	233	25624.4	0	Unmodified	P75957_1full233_1G_P1_1T	25624.4	11	P75957_1full233_1G|LOLD_ECOLI|Lipoprotein-releasing system ATP-binding protein LolD_P1
LOLE_ECOLI	chain	2	414	45418.4	0	Unmodified	P75958_2frag414_1G_P1_1T	45418.4	15	P75958_2frag414_1G|LOLE_ECOLI|Lipoprotein-releasing system transmembrane protein LolE_P1
LOLE_ECOLI	full	1	414	45549.4	0	Unmodified	P75958_1full414_1G_P1_1T	45549.4	15	P75958_1full414_1G|LOLE_ECOLI|Lipoprotein-releasing system transmembrane protein LolE_P1
LOMR_ECOLI	full	1	164	17750.5	0	Unmodified	P77184_1full164_1G_P1_1T	17750.5	4	P77184_1full164_1G|LOMR_ECOLI|Putative protein LomR_P1
LON_ECOLI	chain	2	784	88082.8	0	Unmodified	P0A9M0_2frag784_1G_P1_1T	88082.8	61	P0A9M0_2frag784_1G|LON_ECOLI|Lon protease_P1
LON_ECOLI	full	1	784	88213.8	0	Unmodified	P0A9M0_1full784_1G_P1_1T	88213.8	61	P0A9M0_1full784_1G|LON_ECOLI|Lon protease_P1
LONH_ECOLI	full	1	586	66272.6	0	Unmodified	P75867_1full586_1G_P1_1T	66272.6	12	P75867_1full586_1G|LONH_ECOLI|Putative Lon protease homolog_P1
LPF_ECOLI	full	1	15	1930.97	0	Unmodified	P0AD72_1full15_1G_P1_1T	1930.97	1	P0AD72_1full15_1G|LPF_ECOLI|phe operon leader peptide_P1
LPF2_ECOLI	full	1	14	1760.84	0	Unmodified	P0AD74_1full14_1G_P1_1T	1760.84	0	P0AD74_1full14_1G|LPF2_ECOLI|Phenylalanine--tRNA ligase operon leader peptide_P1
LPFS_ECOLI	full	1	28	3361.64	0	Unmodified	P0ADF0_1full28_1G_P1_1T	3361.64	2	P0ADF0_1full28_1G|LPFS_ECOLI|Putative fruR/shl operon leader peptide_P1
LPFUR_ECOLI	full	1	28	3106.63	0	Unmodified	A8DYP9_1full28_1G_P1_1T	3106.63	0	A8DYP9_1full28_1G|LPFUR_ECOLI|fur leader peptide_P1
LPHI_ECOLI	full	1	16	2088	0	Unmodified	P60995_1full16_1G_P1_1T	2088	1	P60995_1full16_1G|LPHI_ECOLI|his operon leader peptide_P1
LPID_ECOLI	full	1	32	3293.99	0	Unmodified	P62522_1full32_1G_P1_1T	3293.99	1	P62522_1full32_1G|LPID_ECOLI|ilv operon leader peptide_P1
LPIV_ECOLI	full	1	32	3211.83	0	Unmodified	P03061_1full32_1G_P1_1T	3211.83	1	P03061_1full32_1G|LPIV_ECOLI|ilv operon leader peptide_P1
LPL_ECOLI	full	1	28	3143.8	0	Unmodified	P0AD79_1full28_1G_P1_1T	3143.8	0	P0AD79_1full28_1G|LPL_ECOLI|leu operon leader peptide_P1
LPLA_ECOLI	chain	2	338	38217.4	0	Unmodified	P32099_2frag338_1G_P1_1T	38217.4	13	P32099_2frag338_1G|LPLA_ECOLI|Lipoate-protein ligase A_P1
LPLA_ECOLI	full	1	338	38348.4	0	Unmodified	P32099_1full338_1G_P1_1T	38348.4	13	P32099_1full338_1G|LPLA_ECOLI|Lipoate-protein ligase A_P1
LPLT_ECOLI	full	1	397	41952.7	0	Unmodified	P39196_1full397_1G_P1_1T	41952.7	12	P39196_1full397_1G|LPLT_ECOLI|Lysophospholipid transporter LplT_P1
LPMG_ECOLI	full	1	17	2129.21	0	Unmodified	E2JKY7_1full17_1G_P1_1T	2129.21	1	E2JKY7_1full17_1G|LPMG_ECOLI|mgtA leader peptide_P1
LPOA_ECOLI	signal-peptide	1	26	2795.58	0	Unmodified	P45464_1frag26_1G_P1_1T	2795.58	1	P45464_1frag26_1G|LPOA_ECOLI|Penicillin-binding protein activator LpoA_P1
LPOA_ECOLI	chain	27	678	70422.8	0	Unmodified	P45464_27frag678_1G_P1_1T	70422.8	23	P45464_27frag678_1G|LPOA_ECOLI|Penicillin-binding protein activator LpoA_P1
LPOA_ECOLI	full	1	678	73200.4	0	Unmodified	P45464_1full678_1G_P1_1T	73200.4	24	P45464_1full678_1G|LPOA_ECOLI|Penicillin-binding protein activator LpoA_P1
LPOB_ECOLI	signal-peptide	1	19	2096.11	0	Unmodified	P0AB38_1frag19_1G_P1_1T	2096.11	1	P0AB38_1frag19_1G|LPOB_ECOLI|Penicillin-binding protein activator LpoB_P1
LPOB_ECOLI	chain	20	213	20536.4	0	Unmodified	P0AB38_20frag213_1G_P1_1T	20536.4	6	P0AB38_20frag213_1G|LPOB_ECOLI|Penicillin-binding protein activator LpoB_P1
LPOB_ECOLI	full	1	213	22614.5	0	Unmodified	P0AB38_1full213_1G_P1_1T	22614.5	7	P0AB38_1full213_1G|LPOB_ECOLI|Penicillin-binding protein activator LpoB_P1
LPP_ECOLI	signal-peptide	1	20	1971.21	0	Unmodified	P69776_1frag20_1G_P1_1T	1971.21	2	P69776_1frag20_1G|LPP_ECOLI|Major outer membrane lipoprotein Lpp_P1
LPP_ECOLI	chain	21	78	6478.22	0	Unmodified	P69776_21frag78_1G_P1_1T	6478.22	5	P69776_21frag78_1G|LPP_ECOLI|Major outer membrane lipoprotein Lpp_P1
LPP_ECOLI	full	1	78	8431.42	0	Unmodified	P69776_1full78_1G_P1_1T	8431.42	7	P69776_1full78_1G|LPP_ECOLI|Major outer membrane lipoprotein Lpp_P1
LPPY_ECOLI	full	1	44	5224.81	0	Unmodified	P0AD83_1full44_1G_P1_1T	5224.81	2	P0AD83_1full44_1G|LPPY_ECOLI|pyr operon leader peptide_P1
LPRH_ECOLI	full	1	33	3812.83	0	Unmodified	P0ADF3_1full33_1G_P1_1T	3812.83	1	P0ADF3_1full33_1G|LPRH_ECOLI|Putative rho operon leader peptide_P1
LPT_ECOLI	full	1	21	2145.16	0	Unmodified	P0AD86_1full21_1G_P1_1T	2145.16	1	P0AD86_1full21_1G|LPT_ECOLI|thr operon leader peptide_P1
LPTA_ECOLI	signal-peptide	1	27	2871.67	0	Unmodified	P0ADV1_1frag27_1G_P1_1T	2871.67	3	P0ADV1_1frag27_1G|LPTA_ECOLI|Lipopolysaccharide export system protein LptA_P1
LPTA_ECOLI	chain	28	185	17413	0	Unmodified	P0ADV1_28frag185_1G_P1_1T	17413	16	P0ADV1_28frag185_1G|LPTA_ECOLI|Lipopolysaccharide export system protein LptA_P1
LPTA_ECOLI	full	1	185	20266.7	0	Unmodified	P0ADV1_1full185_1G_P1_1T	20266.7	19	P0ADV1_1full185_1G|LPTA_ECOLI|Lipopolysaccharide export system protein LptA_P1
LPTB_ECOLI	chain	2	241	26766.2	0	Unmodified	P0A9V1_2frag241_1G_P1_1T	26766.2	7	P0A9V1_2frag241_1G|LPTB_ECOLI|Lipopolysaccharide export system ATP-binding protein LptB_P1
LPTB_ECOLI	full	1	241	26897.2	0	Unmodified	P0A9V1_1full241_1G_P1_1T	26897.2	7	P0A9V1_1full241_1G|LPTB_ECOLI|Lipopolysaccharide export system ATP-binding protein LptB_P1
LPTC_ECOLI	full	1	191	21785.3	0	Unmodified	P0ADV9_1full191_1G_P1_1T	21785.3	12	P0ADV9_1full191_1G|LPTC_ECOLI|Lipopolysaccharide export system protein LptC_P1
LPTD_ECOLI	signal-peptide	1	24	2634.49	0	Unmodified	P31554_1frag24_1G_P1_1T	2634.49	2	P31554_1frag24_1G|LPTD_ECOLI|LPS-assembly protein LptD_P1
LPTD_ECOLI	chain	25	784	87443.2	0	Unmodified	P31554_25frag784_1G_P1_1T	87443.2	25	P31554_25frag784_1G|LPTD_ECOLI|LPS-assembly protein LptD_P1
LPTD_ECOLI	full	1	784	90059.7	0	Unmodified	P31554_1full784_1G_P1_1T	90059.7	27	P31554_1full784_1G|LPTD_ECOLI|LPS-assembly protein LptD_P1
LPTE_ECOLI	signal-peptide	1	18	1918.13	0	Unmodified	P0ADC1_1frag18_1G_P1_1T	1918.13	0	P0ADC1_1frag18_1G|LPTE_ECOLI|LPS-assembly lipoprotein LptE_P1
LPTE_ECOLI	chain	19	193	19572.1	0	Unmodified	P0ADC1_19frag193_1G_P1_1T	19572.1	9	P0ADC1_19frag193_1G|LPTE_ECOLI|LPS-assembly lipoprotein LptE_P1
LPTE_ECOLI	full	1	193	21472.2	0	Unmodified	P0ADC1_1full193_1G_P1_1T	21472.2	9	P0ADC1_1full193_1G|LPTE_ECOLI|LPS-assembly lipoprotein LptE_P1
LPTF_ECOLI	full	1	366	40541.8	0	Unmodified	P0AF98_1full366_1G_P1_1T	40541.8	12	P0AF98_1full366_1G|LPTF_ECOLI|Lipopolysaccharide export system permease protein LptF_P1
LPTG_ECOLI	full	1	360	39729	0	Unmodified	P0ADC6_1full360_1G_P1_1T	39729	17	P0ADC6_1full360_1G|LPTG_ECOLI|Lipopolysaccharide export system permease protein LptG_P1
LPTN_ECOLI	full	1	24	2965.54	0	Unmodified	P0AD89_1full24_1G_P1_1T	2965.54	2	P0AD89_1full24_1G|LPTN_ECOLI|Tryptophanase operon leader peptide_P1
LPW_ECOLI	full	1	14	1737.97	0	Unmodified	P0AD92_1full14_1G_P1_1T	1737.97	2	P0AD92_1full14_1G|LPW_ECOLI|trp operon leader peptide_P1
LPXA_ECOLI	full	1	262	28427.7	0	Unmodified	P0A722_1full262_1G_P1_1T	28427.7	10	P0A722_1full262_1G|LPXA_ECOLI|Acyl-[acyl-carrier-protein]--UDP-N-acetylglucosamine O-acyltransferase_P1
LPXB_ECOLI	full	1	382	42922.6	0	Unmodified	P10441_1full382_1G_P1_1T	42922.6	21	P10441_1full382_1G|LPXB_ECOLI|Lipid-A-disaccharide synthase_P1
LPXC_ECOLI	full	1	305	34396.6	0	Unmodified	P0A725_1full305_1G_P1_1T	34396.6	15	P0A725_1full305_1G|LPXC_ECOLI|UDP-3-O-acyl-N-acetylglucosamine deacetylase_P1
LPXD_ECOLI	chain	2	341	36395.7	0	Unmodified	P21645_2frag341_1G_P1_1T	36395.7	14	P21645_2frag341_1G|LPXD_ECOLI|UDP-3-O-(3-hydroxymyristoyl)glucosamine N-acyltransferase_P1
LPXD_ECOLI	full	1	341	36526.7	0	Unmodified	P21645_1full341_1G_P1_1T	36526.7	14	P21645_1full341_1G|LPXD_ECOLI|UDP-3-O-(3-hydroxymyristoyl)glucosamine N-acyltransferase_P1
LPXH_ECOLI	full	1	240	27144.2	0	Unmodified	P43341_1full240_1G_P1_1T	27144.2	12	P43341_1full240_1G|LPXH_ECOLI|UDP-2,3-diacylglucosamine hydrolase_P1
LPXK_ECOLI	full	1	328	35956.1	0	Unmodified	P27300_1full328_1G_P1_1T	35956.1	13	P27300_1full328_1G|LPXK_ECOLI|Tetraacyldisaccharide 4'-kinase_P1
LPXL_ECOLI	full	1	306	35812.7	0	Unmodified	P0ACV0_1full306_1G_P1_1T	35812.7	18	P0ACV0_1full306_1G|LPXL_ECOLI|Lipid A biosynthesis lauroyltransferase_P1
LPXM_ECOLI	full	1	323	37644.6	0	Unmodified	P24205_1full323_1G_P1_1T	37644.6	18	P24205_1full323_1G|LPXM_ECOLI|Lipid A biosynthesis myristoyltransferase_P1
LPXP_ECOLI	full	1	306	35810.2	0	Unmodified	P0ACV2_1full306_1G_P1_1T	35810.2	14	P0ACV2_1full306_1G|LPXP_ECOLI|Lipid A biosynthesis palmitoleoyltransferase_P1
LPXT_ECOLI	full	1	237	26886.7	0	Unmodified	P76445_1full237_1G_P1_1T	26886.7	11	P76445_1full237_1G|LPXT_ECOLI|Lipid A 1-diphosphate synthase_P1
LRHA_ECOLI	full	1	312	34871.9	0	Unmodified	P36771_1full312_1G_P1_1T	34871.9	9	P36771_1full312_1G|LRHA_ECOLI|Probable HTH-type transcriptional regulator LrhA_P1
LRP_ECOLI	chain	2	164	18938.2	0	Unmodified	P0ACJ0_2frag164_1G_P1_1T	18938.2	10	P0ACJ0_2frag164_1G|LRP_ECOLI|Leucine-responsive regulatory protein_P1
LRP_ECOLI	full	1	164	19069.2	0	Unmodified	P0ACJ0_1full164_1G_P1_1T	19069.2	10	P0ACJ0_1full164_1G|LRP_ECOLI|Leucine-responsive regulatory protein_P1
LSPA_ECOLI	full	1	164	18298.6	0	Unmodified	P00804_1full164_1G_P1_1T	18298.6	5	P00804_1full164_1G|LSPA_ECOLI|Lipoprotein signal peptidase_P1
LSRA_ECOLI	full	1	511	56231.9	0	Unmodified	P77257_1full511_1G_P1_1T	56231.9	20	P77257_1full511_1G|LSRA_ECOLI|Autoinducer 2 import ATP-binding protein LsrA_P1
LSRB_ECOLI	signal-peptide	1	26	2812.62	0	Unmodified	P76142_1frag26_1G_P1_1T	2812.62	2	P76142_1frag26_1G|LSRB_ECOLI|Autoinducer 2-binding protein LsrB_P1
LSRB_ECOLI	chain	27	340	34189.7	0	Unmodified	P76142_27frag340_1G_P1_1T	34189.7	24	P76142_27frag340_1G|LSRB_ECOLI|Autoinducer 2-binding protein LsrB_P1
LSRB_ECOLI	full	1	340	36984.3	0	Unmodified	P76142_1full340_1G_P1_1T	36984.3	26	P76142_1full340_1G|LSRB_ECOLI|Autoinducer 2-binding protein LsrB_P1
LSRC_ECOLI	full	1	342	36736.3	0	Unmodified	P77672_1full342_1G_P1_1T	36736.3	10	P77672_1full342_1G|LSRC_ECOLI|Autoinducer 2 import system permease protein LsrC_P1
LSRD_ECOLI	full	1	330	34743	0	Unmodified	P0AFS1_1full330_1G_P1_1T	34743	3	P0AFS1_1full330_1G|LSRD_ECOLI|Autoinducer 2 import system permease protein LsrD_P1
LSRF_ECOLI	full	1	291	32277.4	0	Unmodified	P76143_1full291_1G_P1_1T	32277.4	15	P76143_1full291_1G|LSRF_ECOLI|3-hydroxy-5-phosphonooxypentane-2,4-dione thiolase_P1
LSRG_ECOLI	full	1	96	11360.8	0	Unmodified	P64461_1full96_1G_P1_1T	11360.8	7	P64461_1full96_1G|LSRG_ECOLI|(4S)-4-hydroxy-5-phosphonooxypentane-2,3-dione isomerase_P1
LSRK_ECOLI	full	1	530	58206.5	0	Unmodified	P77432_1full530_1G_P1_1T	58206.5	16	P77432_1full530_1G|LSRK_ECOLI|Autoinducer-2 kinase_P1
LSRR_ECOLI	full	1	317	34083.8	0	Unmodified	P76141_1full317_1G_P1_1T	34083.8	10	P76141_1full317_1G|LSRR_ECOLI|Transcriptional regulator LsrR_P1
LTAE_ECOLI	full	1	333	36803.9	0	Unmodified	P75823_1full333_1G_P1_1T	36803.9	13	P75823_1full333_1G|LTAE_ECOLI|Low specificity L-threonine aldolase_P1
LUXS_ECOLI	chain	2	171	19491.7	0	Unmodified	P45578_2frag171_1G_P1_1T	19491.7	6	P45578_2frag171_1G|LUXS_ECOLI|S-ribosylhomocysteine lyase_P1
LUXS_ECOLI	full	1	171	19622.8	0	Unmodified	P45578_1full171_1G_P1_1T	19622.8	6	P45578_1full171_1G|LUXS_ECOLI|S-ribosylhomocysteine lyase_P1
LYSD_ECOLI	full	1	165	18284.6	0	Unmodified	P78285_1full165_1G_P1_1T	18284.6	12	P78285_1full165_1G|LYSD_ECOLI|Lysozyme RrrD_P1
[truncated: 3,659 more rows]

## Sheet: T S-4
SI Table S-4	Complete List of ET (Using Catalogs Derived from UniProt and G-PTM-D Databases), and EE Mass Differences
Analysis with UniProt Database			Comparing 2244 Experimental proteoforms				Analysis with G-PTM-D Database
ET Mass Difference (Da)	Counts	Selected?	EE Mass Difference (Da)	Counts	FDR	Selected?	ET Mass Difference (Da)	Counts	Selected?
-299.187	1	no	0.0642	8	0.63	no	-299.187	1	no
-298.963	1	no	0.1084	2	1.5	no	-298.963	1	no
-298.099	1	no	0.1726	1	0	no	-298.147	1	no
-298.056	1	no	1.0589	1	1	no	-298.099	1	no
-298.018	4	no	1.1205	2	0	no	-298.056	1	no
-297.168	2	no	1.1595	1	2	no	-298.018	4	no
-297.035	1	no	2.0604	2	1	no	-297.168	2	no
-296.988	1	no	2.0946	8	0.25	no	-297.035	1	no
-296.012	2	no	2.1875	2	1	no	-296.988	1	no
-295.163	1	no	3.0525	3	0	no	-296.017	1	no
-295.126	1	no	3.1068	5	0	no	-295.163	1	no
-295.061	1	no	3.1337	1	1	no	-295.126	1	no
-294.162	1	no	3.9864	34	0	no	-295.061	1	no
-294.11	1	no	4.0273	5	0	no	-294.162	1	no
-294.06	1	no	4.0858	6	0.17	no	-294.11	1	no
-293.156	1	no	4.1209	1	1	no	-294.06	1	no
-293.064	3	no	4.1482	1	1	no	-293.156	1	no
-292.13	2	no	4.9716	22	0.05	no	-293.064	3	no
-291.98	1	no	5.0146	9	0.11	no	-292.13	2	no
-291.142	2	no	5.0405	1	0	no	-291.98	1	no
-291.08	1	no	5.0878	2	0.5	no	-291.142	2	no
-291.052	2	no	5.1317	1	0	no	-291.08	1	no
-290.994	1	no	5.9604	1	0	no	-291.052	2	no
-290.156	1	no	5.9857	20	0.05	no	-290.994	1	no
-290.041	1	no	6.0328	4	0	no	-290.156	1	no
-290.003	1	no	6.0662	1	0	no	-290.041	1	no
-289.121	1	no	6.1041	2	0.5	no	-290.003	1	no
-289.063	1	no	6.9775	12	0.08	no	-289.121	1	no
-289.018	1	no	7.0205	7	0.29	no	-289.063	1	no
-288.18	1	no	7.053	3	0.33	no	-289.018	1	no
-288.065	1	no	7.0859	3	1	no	-288.18	1	no
-287.975	1	no	7.9616	1	0	no	-288.065	1	no
-287.068	1	no	8.0025	10	0	no	-287.975	1	no
-287.041	1	no	8.0892	4	0	no	-287.068	1	no
-286.153	4	no	8.9618	1	1	no	-287.041	1	no
-286.027	1	no	8.9846	9	0.22	no	-286.153	4	no
-285.99	2	no	9.0303	31	0.06	no	-286.027	1	no
-285.129	1	no	9.0657	5	0.4	no	-285.99	2	no
-284.99	1	no	9.109	4	0.5	no	-285.129	1	no
-284.154	2	no	9.9765	4	0	no	-284.99	1	no
-284.088	1	no	10.0139	29	0.03	no	-284.154	2	no
-283.99	1	no	10.0532	5	0	no	-284.088	1	no
-283.108	1	no	10.1762	2	0	no	-283.99	1	no
-282.956	1	no	10.9857	7	0	no	-283.108	1	no
-282.06	2	no	11.0261	20	0	no	-282.956	1	no
-282.023	3	no	11.0842	4	0.25	no	-282.06	2	no
-281.96	1	no	11.9661	4	0	no	-282.023	3	no
-281.034	1	no	12.0124	43	0.02	no	-281.96	1	no
-280.973	3	no	12.0544	12	0.08	no	-281.034	1	no
-280.151	1	no	12.0963	5	0.4	no	-280.973	3	no
-280.083	1	no	13.0002	18	0	no	-280.151	1	no
-279.982	1	no	13.0544	6	0	no	-280.083	1	no
-279.151	1	no	13.1825	1	0	no	-279.982	1	no
-278.049	1	no	13.9719	1	0	no	-279.151	1	no
-277.109	1	no	14.0373	4	0.5	no	-278.049	1	no
-277.067	1	no	14.069	3	0.33	no	-277.109	1	no
-275.113	1	no	14.1331	1	0	no	-277.067	1	no
-275.061	4	no	14.9688	2	1	no	-275.113	1	no
-274.109	1	no	14.9971	55	0.02	no	-275.061	4	no
-274.082	1	no	15.0439	11	0.09	no	-274.109	1	no
-274.047	1	no	15.0689	3	0	no	-274.082	1	no
-274.008	1	no	15.1398	3	0	no	-274.047	1	no
-273.156	1	no	15.179	1	0	no	-274.008	1	no
-272.962	1	no	15.9666	7	0	no	-273.156	1	no
-272.03	1	no	16.0346	41	0.02	no	-272.962	1	no
-271.992	1	no	16.0684	2	0	no	-272.03	1	no
-271.964	1	no	16.0948	2	0	no	-271.992	1	no
-271.043	2	no	16.1702	1	1	no	-271.964	1	no
-270.113	3	no	16.9735	7	0	no	-271.043	2	no
-270.039	2	no	17.0088	52	0	no	-270.113	3	no
-269.976	3	no	17.0456	14	0	no	-270.039	2	no
-269.169	1	no	17.0875	2	0.5	no	-269.976	3	no
-269.107	1	no	17.1328	9	0	no	-269.169	1	no
-268.094	2	no	17.9749	8	0.13	no	-269.107	1	no
-268.043	1	no	18.0769	10	0.1	no	-268.094	2	no
-267.146	1	no	18.1144	2	0.5	no	-268.043	1	no
-267.085	1	no	18.1625	2	0.5	no	-267.146	1	no
-267.027	2	no	18.9709	2	0	no	-267.085	1	no
-266.141	1	no	19.0094	8	0	no	-267.027	2	no
-266.026	2	no	19.0578	3	0	no	-266.141	1	no
-265.942	1	no	19.1161	1	1	no	-266.026	2	no
-265.126	1	no	19.1413	1	0	no	-265.942	1	no
-265.034	1	no	19.9601	1	0	no	-265.126	1	no
-265	1	no	19.9905	16	0	no	-265.034	1	no
-264.086	1	no	20.0367	4	1	no	-265	1	no
-264.05	1	no	20.1049	1	0	no	-264.086	1	no
-263.149	1	no	20.1462	1	1	no	-264.05	1	no
-263.064	3	no	20.9722	24	0	no	-263.149	1	no
-262.142	2	no	21.0158	12	0	no	-263.064	3	no
-262.046	2	no	21.0548	2	1	no	-262.142	2	no
-261.124	2	no	21.0949	1	1	no	-262.046	2	no
-261.06	1	no	21.1425	1	0	no	-261.95	1	no
-260.125	1	no	21.9756	6	0.33	no	-261.124	2	no
-260.089	1	no	22.0265	10	0	no	-261.06	1	no
-259.959	1	no	22.0675	6	0	no	-260.125	1	no
-259.111	2	no	22.1231	2	0	no	-260.089	1	no
-259.058	2	no	22.992	8	0.13	no	-259.959	1	no
-258.19	1	no	23.0441	1	1	no	-259.111	2	no
-258.11	2	no	23.0879	5	0.2	no	-259.058	2	no
-258.013	1	no	23.9793	5	0	no	-258.19	1	no
-257.096	1	no	24.02	9	0.11	no	-258.11	2	no
-257.012	1	no	24.0524	2	0	no	-258.013	1	no
-256.11	1	no	24.0947	3	0.33	no	-257.012	1	no
-255.062	1	no	24.1832	2	0	no	-256.11	1	no
-254.994	1	no	24.9639	1	0	no	-255.959	1	no
-254.959	1	no	24.9837	10	0.1	no	-255.062	1	no
-254.182	1	no	25.0273	42	0.02	no	-254.994	1	no
-254.071	2	no	25.065	4	0.25	no	-254.959	1	no
-254.034	1	no	25.9808	9	0	no	-254.182	1	no
-254.008	1	no	26.0249	28	0	no	-254.073	1	no
-253.941	1	no	26.0771	2	0	no	-254.034	1	no
-253.157	1	no	26.1398	2	0.5	no	-254.008	1	no
-253.106	2	no	26.1788	3	0	no	-253.941	1	no
-253.056	2	no	26.987	1	1	no	-253.157	1	no
-253.003	1	no	27.0252	34	0	no	-253.106	2	no
-252.162	2	no	27.0652	4	0.25	no	-253.056	2	no
-252.092	1	no	27.0967	4	0	no	-253.003	1	no
-251.998	1	no	27.133	1	0	no	-252.162	2	no
-251.166	1	no	27.9856	2	1	no	-252.092	1	no
-250.122	1	no	28.092	6	0.17	no	-251.998	1	no
-250.086	1	no	28.1488	2	3	no	-251.166	1	no
-250.042	2	no	29.046	9	0	no	-250.122	1	no
-249.948	1	no	29.1652	2	0	no	-250.086	1	no
-249.135	3	no	29.9668	3	0.33	no	-250.042	2	no
-248.997	1	no	29.9962	25	0	no	-249.948	1	no
-248.067	1	no	30.0395	7	0	no	-249.135	3	no
-248	1	no	30.0619	1	0	no	-248.997	1	no
-247.11	1	no	30.1297	2	0	no	-248.162	1	no
-247.078	5	no	30.9661	4	0.25	no	-248.067	1	no
-247.012	2	no	30.9936	27	0	no	-248	1	no
-246.061	1	no	31.0354	16	0	no	-247.087	4	no
-245.965	1	no	31.1092	1	0	no	-247.012	2	no
-245.185	3	no	31.1528	2	0	no	-246.123	1	no
-245.1	3	no	31.9654	4	0	no	-246.061	1	no
-245.051	1	no	32.0315	23	0.04	no	-245.965	1	no
-245.006	3	no	32.0663	3	0.33	no	-245.185	3	no
-244.161	1	no	32.1333	2	0	no	-245.1	3	no
-244.111	2	no	32.9775	10	0	no	-245.051	1	no
-244.021	2	no	33.0112	45	0	no	-245.006	3	no
-243.179	1	no	33.0495	5	0	no	-244.161	1	no
-243.139	1	no	33.1037	1	1	no	-244.111	2	no
-242.041	1	no	33.1416	4	0	no	-244.021	2	no
-241.105	1	no	33.9732	8	0	no	-243.179	1	no
-240.142	1	no	34.0124	25	0	no	-243.139	1	no
-240.105	2	no	34.0487	4	0.25	no	-242.041	1	no
-240.022	1	no	34.0734	1	2	no	-241.105	1	no
-239.107	1	no	34.1457	1	0	no	-240.142	1	no
-238.94	1	no	34.9632	2	0	no	-240.105	2	no
-238.178	2	no	34.9934	8	0.13	no	-240.022	1	no
-238.084	3	no	35.0448	5	0.2	no	-238.94	1	no
-238.033	2	no	35.0702	2	0	no	-238.178	2	no
-237.985	1	no	35.1041	1	0	no	-238.09	2	no
-237.046	1	no	35.9745	9	0	no	-238.033	2	no
-236.945	1	no	36.0078	11	0.09	no	-237.985	1	no
-236.165	1	no	36.0376	1	2	no	-237.046	1	no
-235.181	1	no	36.0665	9	0.11	no	-236.945	1	no
-235.138	2	no	36.1131	3	0.33	no	-236.165	1	no
-235.077	2	no	36.139	1	1	no	-235.181	1	no
-235.033	2	no	36.9817	12	0	no	-235.138	2	no
-234.959	2	no	37.0256	7	0	no	-235.077	2	no
-234.127	1	no	37.0512	1	1	no	-235.033	2	no
-234.044	1	no	37.0816	5	0.2	no	-234.959	2	no
-233.125	1	no	37.1376	1	0	no	-234.127	1	no
-233.066	2	no	37.9815	3	0	no	-234.044	1	no
-233.02	1	no	38.0137	5	0	no	-233.125	1	no
-232.955	2	no	38.0578	12	0	no	-233.066	2	no
-232.148	1	no	38.0929	2	0.5	no	-233.02	1	no
-232.085	3	no	38.1287	2	0	no	-232.955	2	no
-232.007	2	no	38.9878	9	0	no	-232.148	1	no
-231.149	1	no	39.0161	1	1	no	-232.076	2	no
-231.084	1	no	39.0437	1	2	no	-232.007	2	no
-231.041	3	no	39.0736	6	0	no	-231.149	1	no
-230.061	1	no	39.1585	2	0	no	-231.041	3	no
-230.026	1	no	39.9729	3	0	no	-230.061	1	no
-229.165	2	no	40.0085	12	0.08	no	-230.026	1	no
-229.075	2	no	40.0585	7	0	no	-229.165	2	no
-228.998	1	no	40.0974	1	1	no	-229.075	2	no
-228.963	1	no	40.1884	1	0	no	-228.998	1	no
-228.174	2	no	40.977	10	0.1	no	-228.963	1	no
-228.118	1	no	41.0213	34	0	no	-228.174	2	no
-228	1	no	41.0477	3	0	no	-228.118	1	no
-227.119	1	no	41.159	1	1	no	-228	1	no
-227.064	3	no	41.1883	1	0	no	-227.119	1	no
-227.009	2	no	41.9816	3	0	no	-227.064	3	no
-226.978	1	no	42.0978	4	0	no	-227.009	2	no
-226.142	4	no	42.1364	1	1	no	-226.978	1	no
-226.08	2	no	42.1774	4	0.75	no	-226.146	3	no
-226.015	1	no	42.9741	1	1	no	-226.08	2	no
-225.941	1	no	42.9997	6	0	no	-226.015	1	no
-225.116	1	no	43.0373	29	0.03	no	-225.941	1	no
-225.085	1	no	43.0721	7	0	no	-225.116	1	no
-224.045	1	no	43.1192	1	0	no	-225.085	1	no
-224.011	1	no	43.9629	1	0	no	-224.045	1	no
-223.138	1	no	44.0707	2	0	no	-224.011	1	no
-223.094	1	no	44.153	1	1	no	-223.138	1	no
-222.176	1	no	44.9831	16	0.06	no	-223.094	1	no
-222.079	2	no	45.0335	11	0	no	-222.176	1	no
-221.962	1	no	45.0627	5	0.4	no	-222.078	1	no
-221.155	1	no	45.1245	2	0	no	-221.962	1	no
-220.945	2	no	45.168	3	0	no	-221.155	1	no
-220.098	1	no	45.9859	34	0.03	no	-221.064	1	no
-219.186	1	no	46.0187	4	0.5	no	-220.089	2	no
-219.116	1	no	46.0588	6	0.17	no	-219.186	1	no
-219.09	1	no	46.1116	2	0	no	-219.116	1	no
-219.032	2	no	46.9763	9	0.11	no	-219.032	2	no
-218.964	3	no	47.0159	21	0	no	-218.964	3	no
-218.118	3	no	47.0635	2	0	no	-218.118	3	no
-217.994	2	no	47.1264	1	0	no	-217.994	2	no
-217.095	1	no	47.1521	1	0	no	-217.095	1	no
-217.03	3	no	47.9644	7	0	no	-217.03	3	no
-216.956	1	no	48.0276	11	0.09	no	-216.956	1	no
-216.139	1	no	48.0659	2	0.5	no	-216.139	1	no
-216.107	1	no	48.9719	2	0	no	-216.056	3	no
-216.056	3	no	48.9988	27	0	no	-215.951	1	no
-215.951	1	no	49.0329	6	0.17	no	-215.063	1	no
-215.063	1	no	49.1149	3	0.33	no	-215.034	1	no
-215.034	1	no	49.1897	1	0	no	-215.005	1	no
-215.005	1	no	49.9645	2	0	no	-214.18	1	no
-214.18	1	no	49.9965	24	0	no	-214.135	1	no
-214.135	1	no	50.046	3	0.33	no	-214.074	1	no
-214.074	1	no	50.0932	2	0	no	-214.033	1	no
-214.033	1	no	50.1384	1	0	no	-213.092	4	no
-213.115	1	no	50.9825	14	0	no	-212.97	1	no
-213.073	1	no	51.0223	1	0	no	-212.043	1	no
-212.97	1	no	51.0819	2	0.5	no	-211.989	1	no
-212.111	1	no	51.9661	3	0	no	-211.941	1	no
-212.043	1	no	51.9985	25	0	no	-211.114	1	no
-211.989	1	no	52.0332	1	2	no	-211.072	4	no
-211.941	1	no	52.0608	14	0.14	no	-211.003	2	no
-211.114	1	no	52.1171	4	0.25	no	-210.148	1	no
-211.072	4	no	52.9627	1	1	no	-210.097	1	no
-211.003	2	no	52.9903	10	0.1	no	-209.079	1	no
-210.148	1	no	53.0495	13	0.15	no	-208.978	1	no
-210.097	1	no	53.0771	1	1	no	-208.07	1	no
-209.079	1	no	53.1515	1	3	no	-208.007	2	no
-208.978	1	no	53.9851	9	0	no	-207.185	1	no
-208.07	1	no	54.0254	3	0	no	-207.092	1	no
-208.007	2	no	54.0686	11	0	no	-207.001	1	no
-207.185	1	no	54.1348	4	0	no	-206.1	2	no
-207.092	1	no	54.9726	4	0.25	no	-205.183	1	no
-207.001	1	no	55.0136	3	0	no	-205.157	1	no
-206.093	3	no	55.0591	6	0	no	-205.113	3	no
-205.183	1	no	55.0887	1	1	no	-205.069	1	no
-205.157	1	no	55.1796	1	0	no	-204.99	1	no
-205.11	2	no	55.9856	2	0.5	no	-204.95	1	no
-204.99	1	no	56.0121	9	0	no	-204.1	4	no
-204.95	1	no	56.0556	7	0	no	-204.038	2	no
-204.105	3	no	56.9793	7	0.14	no	-203.967	1	no
-204.038	2	no	57.0213	41	0.07	no	-203.041	1	no
-203.967	1	no	57.0583	2	0	no	-202.992	2	no
-203.041	1	no	57.0963	1	1	no	-202.964	1	no
-202.992	2	no	57.9911	3	0.67	no	-202.133	1	no
-202.964	1	no	58.0925	2	0	no	-202.088	2	no
-202.133	1	no	58.9643	3	0.33	no	-202.026	3	no
-202.088	2	no	59.0062	6	0	no	-201.096	3	no
-202.026	3	no	59.038	37	0	no	-201.023	1	no
-201.096	3	no	59.0747	5	0	no	-200.963	3	no
-201.023	1	no	59.0978	1	1	no	-200.048	1	no
-200.963	3	no	59.154	1	0	no	-199.98	1	no
-200.109	1	no	59.977	10	0	no	-199.952	1	no
-200.083	1	no	60.0274	12	0	no	-199.185	1	no
-200.048	1	no	60.0785	6	0.17	no	-199.06	2	no
-199.952	1	no	60.9866	18	0.06	no	-199.002	1	no
-199.185	1	no	61.0369	9	0.22	no	-198.166	2	no
-199.06	2	no	61.0706	4	0.25	no	-198.062	2	no
-199.002	1	no	61.1102	1	1	no	-198.016	1	no
-198.166	2	no	61.1489	2	0	no	-197.95	1	no
-198.062	2	no	61.9668	3	0	no	-197.096	1	no
-198.016	1	no	61.9941	22	0	no	-197.011	1	no
-197.95	1	no	62.0256	2	1.5	no	-196.089	2	no
-197.011	1	no	62.0617	3	0.33	no	-195.092	1	no
-196.089	2	no	62.1036	3	0	no	-195.061	1	no
-195.092	1	no	62.9744	1	1	no	-195.003	1	no
-195.061	1	no	62.9957	18	0.06	no	-194.974	1	no
-195.003	1	no	63.0379	5	0.2	no	-194.046	1	no
-194.974	1	no	63.074	4	0	no	-193.114	1	no
-194.046	1	no	63.1133	1	0	no	-193.049	1	no
-193.114	1	no	63.1736	1	0	no	-192.125	1	no
-193.049	1	no	63.9675	5	0	no	-192.096	1	no
-192.125	1	no	64.0365	1	1	no	-192.019	2	no
-192.096	1	no	64.1141	2	0.5	no	-191.989	2	no
-192.019	2	no	64.9849	15	0	no	-191.955	1	no
-191.989	2	no	65.0149	5	0	no	-191.07	5	no
-191.955	1	no	65.0453	4	0	no	-191.007	1	no
-191.07	5	no	65.1771	2	0.5	no	-190.174	1	no
-191.007	1	no	65.9777	27	0	no	-190.125	2	no
-190.174	1	no	66.0139	10	0	no	-190.067	1	no
-190.114	3	no	66.0481	1	0	no	-189.121	1	no
-190.067	1	no	66.0794	7	0	no	-189.076	1	no
-189.042	4	no	66.1239	2	0	no	-189.03	2	no
-188.972	3	no	66.9859	9	0.11	no	-188.972	3	no
-188.041	6	no	67.0217	3	0	no	-188.092	1	no
-188.007	1	no	67.0637	7	0	no	-188.041	5	no
-187.977	1	no	67.9763	9	0	no	-187.977	1	no
-187.035	1	no	68.0151	22	0.05	no	-187.035	1	no
-186.045	3	no	68.0641	10	0	no	-186.959	1	no
-186.014	1	no	68.1115	2	0	no	-186.045	3	no
-185.955	1	no	68.9757	10	0	no	-186.014	1	no
-185.098	4	no	69.0207	3	0.67	no	-185.955	1	no
-185.002	1	no	69.0577	10	0	no	-185.101	3	no
-184.969	2	no	69.0932	1	0	no	-185.002	1	no
-184.114	4	no	69.9717	2	0.5	no	-184.969	2	no
-184.052	1	no	70.0015	3	0.33	no	-184.114	4	no
-184.024	1	no	70.0408	1	1	no	-184.052	1	no
-183.144	2	no	70.0703	7	0	no	-184.024	1	no
-183.011	1	no	70.1525	2	1.5	no	-183.144	2	no
-182.952	1	no	70.9802	3	0	no	-183.011	1	no
-182.185	1	no	71.0327	6	0.17	no	-182.952	1	no
-182.002	2	no	71.0681	2	0.5	no	-182.185	1	no
-179.998	3	no	71.1707	2	0	no	-182.002	2	no
-179.144	2	no	71.9743	2	0	no	-179.998	3	no
-179.043	2	no	72.0076	18	0	no	-179.144	2	no
-178.125	3	no	72.0536	9	0.22	no	-179.043	2	no
-177.973	1	no	72.0829	1	0	no	-178.125	3	no
-177.072	1	no	72.1742	1	0	no	-177.973	1	no
-177.027	1	no	72.9729	4	0	no	-177.072	1	no
-176.977	1	no	73.014	29	0	no	-177.027	1	no
-176.178	2	no	73.0618	5	0.4	no	-176.977	1	no
-176.021	1	no	73.0994	1	2	no	-176.178	2	no
-175.989	1	no	73.1423	2	0.5	no	-176.021	1	no
-175.106	1	no	73.9786	2	0	no	-175.989	1	no
-175.064	3	no	74.0215	24	0	no	-175.106	1	no
-175.001	4	no	74.0594	2	0	no	-175.061	2	no
-174.061	4	no	74.1592	1	0	no	-175.001	4	no
-173.179	1	no	74.9601	1	0	no	-173.179	1	no
-173.132	2	no	74.9856	5	0	no	-173.132	2	no
-173.058	3	no	75.0343	24	0.04	no	-173.076	2	no
-172.15	2	no	75.0645	3	0	no	-173.038	1	no
-172.099	1	no	75.1612	1	1	no	-172.15	2	no
-172.061	3	no	75.9739	2	0.5	no	-172.075	5	no
-172.001	1	no	76.0062	12	0	no	-172.001	1	no
-171.135	1	no	76.0333	1	0	no	-171.135	1	no
-171.069	1	no	76.0736	6	0	no	-171.069	1	no
-171.023	1	no	76.9836	24	0.04	no	-171.023	1	no
-170.993	1	no	77.0195	4	0	no	-170.993	1	no
-170.056	2	no	77.0764	5	0	no	-170.056	2	no
-169.986	3	no	77.1082	1	0	no	-169.986	3	no
-168.074	3	no	77.1442	2	0	no	-168.067	2	no
-167.995	2	no	77.9798	21	0	no	-167.995	2	no
-167.161	3	no	78.0207	4	0.5	no	-167.161	3	no
-167.107	2	no	78.0709	4	0	no	-167.107	2	no
-166.987	1	no	78.1102	1	0	no	-166.987	1	no
-165.143	1	no	78.9954	20	0	no	-165.143	1	no
-165.055	1	no	79.0628	4	0	no	-165.055	1	no
-165	2	no	79.1068	3	0	no	-165	2	no
-164.942	1	no	79.1545	1	0	no	-164.942	1	no
-164.078	2	no	79.9634	2	0	no	-164.086	1	no
-164.018	4	no	80.0362	5	0	no	-164.018	4	no
-163.149	1	no	80.1388	1	0	no	-163.149	1	no
-163.102	2	no	80.9769	9	0	no	-163.102	2	no
-163.047	5	no	81.0093	8	0.13	no	-163.045	3	no
-162.967	1	no	81.0471	3	0.67	no	-162.967	1	no
-162.173	1	no	81.0973	1	1	no	-162.173	1	no
-162.113	1	no	81.174	2	0	no	-162.113	1	no
-162.031	2	no	81.9727	43	0.02	no	-162.029	1	no
-161.971	2	no	82.0087	7	0.14	no	-161.971	2	no
-161.941	1	no	82.0678	12	0	no	-161.941	1	no
-161.065	1	no	82.1088	4	0	no	-161.065	1	no
-160.999	3	no	82.9708	1	1	no	-160.999	3	no
-160.951	1	no	82.997	10	0.1	no	-160.951	1	no
-160.088	2	no	83.054	11	0	no	-160.088	2	no
-159.094	3	no	83.1146	2	0	no	-159.094	3	no
-159.067	1	no	83.9722	3	0	no	-159.067	1	no
-159.014	2	no	84.0025	9	0	no	-159.014	2	no
-158.189	1	no	84.1174	3	0	no	-158.189	1	no
-158.148	1	no	84.9755	7	0	no	-158.152	2	no
-158.095	1	no	85.0133	1	1	no	-158.095	1	no
-158.066	1	no	85.0446	5	0	no	-158.066	1	no
-158.038	3	no	85.0814	2	0.5	no	-158.038	3	no
-158.01	1	no	85.9731	6	0.17	no	-158.01	1	no
-157.97	2	no	86.114	2	0	no	-157.97	2	no
-157.14	1	no	86.9846	8	0	no	-157.14	1	no
-157.057	3	no	87.0156	1	0	no	-157.089	1	no
-156.988	2	no	87.0679	7	0	no	-157.046	1	no
-156.038	4	no	87.1618	1	0	no	-156.988	2	no
-155.99	1	no	87.9616	1	0	no	-156.105	1	no
-155.115	2	no	87.9891	11	0	no	-156.061	1	no
-155.046	1	no	88.0279	5	0	no	-156.021	1	no
-154.961	6	no	88.0689	4	0	no	-155.99	1	no
-154.18	1	no	88.968	1	0	no	-155.115	2	no
-154.109	1	no	89.0032	17	0	no	-155.06	3	no
-153.954	6	no	89.0422	1	0	no	-155.003	1	no
-153.062	1	no	89.092	4	0	no	-154.961	6	no
-152.176	2	no	89.1298	1	0	no	-154.18	1	no
-152.13	2	no	89.9694	1	2	no	-154.109	1	no
-151.167	1	no	90.0161	14	0.14	no	-154.052	1	no
-151.075	1	no	90.0522	2	0	no	-154.019	1	no
-151.018	1	no	90.1444	1	0	no	-153.954	6	no
-150.958	1	no	90.1827	1	0	no	-153.062	1	no
-150.158	1	no	90.9802	4	0	no	-152.176	2	no
-150.041	1	no	91.0232	12	0	no	-152.13	2	no
-149.171	1	no	91.0578	4	0	no	-151.167	1	no
-149.111	6	no	91.1722	1	1	no	-151.018	1	no
-149.042	7	no	91.9765	1	1	no	-150.958	1	no
-148.994	1	no	92.0046	14	0	no	-150.158	1	no
-148.951	2	no	92.0472	5	0	no	-150.041	1	no
-148.078	2	no	92.9719	7	0	no	-149.171	1	no
-148.046	8	no	93.0103	11	0.18	no	-149.112	5	no
-147.943	1	no	93.0757	4	0	no	-149.041	6	no
-147.182	1	no	93.1359	1	2	no	-148.994	1	no
-147.063	6	no	93.9807	16	0	no	-148.951	2	no
-147.022	3	no	94.0262	4	0	no	-148.078	2	no
-146.182	1	no	94.0706	9	0	no	-148.046	8	no
-146.156	1	no	94.1152	1	0	no	-147.943	1	no
-146.073	1	no	94.9831	2	0	no	-147.182	1	no
-146.041	1	no	95.0098	12	0	no	-147.062	5	no
-145.979	1	no	95.0573	8	0	no	-147.022	3	no
-145.067	2	no	95.1	7	0	no	-146.182	1	no
-144.998	1	no	95.1438	1	0	no	-146.156	1	no
-144.063	2	no	95.9603	1	2	no	-145.979	1	no
-144.01	3	no	95.9875	42	0.02	no	-145.067	2	no
-143.079	3	no	96.0364	4	0	no	-144.998	1	no
-142.974	2	no	96.1542	1	0	no	-144.135	1	no
-142.097	1	no	96.9749	12	0	no	-144.063	2	no
-142.052	2	no	97.011	4	0.25	no	-144.012	2	no
-141.973	4	no	97.0471	1	1	no	-143.079	3	no
-141.146	1	no	97.0833	3	0	no	-142.974	2	no
-141.088	1	no	97.1781	3	0	no	-142.097	1	no
-141.048	8	no	97.9694	61	0	no	-142.052	2	no
-140.962	1	no	98.012	4	0.25	no	-141.973	4	no
-140.149	1	no	98.0474	1	1	no	-141.146	1	no
-140.074	2	no	98.0778	11	0.09	no	-141.083	3	no
-140.025	2	no	98.1228	1	0	no	-141.04	5	no
-139.175	1	no	98.1566	1	0	no	-140.962	1	no
-139.13	3	no	98.9772	8	0	no	-140.149	1	no
-139.08	1	no	99.0177	5	0	no	-140.078	5	no
-138.978	1	no	99.0606	9	0.11	no	-140.026	1	no
-138.114	1	no	99.1246	1	0	no	-139.175	1	no
-138.011	1	no	99.1729	1	0	no	-139.13	3	no
-137.967	1	no	99.9664	5	0	no	-139.08	1	no
-137.128	2	no	100.007	7	0.29	no	-138.978	1	no
-136.987	2	no	100.111	5	0.2	no	-138.114	1	no
-136.164	1	no	100.975	2	1	no	-138.011	1	no
-136.008	1	no	101.055	6	0	no	-137.967	1	no
-135.163	1	no	101.086	1	0	no	-137.128	2	no
-135.024	1	no	101.119	1	0	no	-136.987	2	no
-134.983	2	no	101.19	1	2	no	-136.164	1	no
-134.944	1	no	101.98	17	0.12	no	-136.008	1	no
-134.082	1	no	102.063	8	0	no	-135.163	1	no
-134.055	1	no	102.104	5	0	no	-134.983	2	no
-133.171	1	no	102.136	1	0	no	-134.082	1	no
-133.128	1	no	102.984	18	0	no	-134.055	1	no
-133.085	1	no	103.012	2	0	no	-133.171	1	no
-133.037	1	no	103.058	6	0.17	no	-133.128	1	no
-132.061	1	no	103.105	1	1	no	-133.085	1	no
-132.018	18	no	103.972	3	0.33	no	-133.037	1	no
-131.977	3	no	104.009	10	0	no	-132.108	1	no
-131.943	1	no	104.048	3	0	no	-132.061	1	no
-131.176	3	no	104.158	1	1	no	-132.018	15	no
-131.081	2	no	104.974	4	0	no	-131.977	3	no
-131.047	3	no	105.015	14	0	no	-131.943	1	no
-131.013	49	yes	105.055	2	0	no	-131.176	3	no
-130.966	8	no	105.106	6	0	no	-131.081	2	no
-130.17	1	no	105.963	2	0	no	-131.047	3	no
-130.008	1	no	105.99	6	0.17	no	-131.012	42	yes
-129.976	5	no	106.031	11	0.09	no	-130.962	4	no
-129.117	1	no	106.079	2	0	no	-130.17	1	no
-129.007	1	no	106.116	1	0	no	-130.14	1	no
-127.976	3	no	106.177	1	0	no	-130.083	1	no
-127.107	1	no	106.972	4	0	no	-129.976	5	no
-127.078	3	no	107.012	13	0.08	no	-129.117	1	no
-126.058	5	no	107.049	2	0.5	no	-129.076	1	no
-126.005	1	no	107.992	6	0	no	-129.028	3	no
-125.129	1	no	108.039	7	0.14	no	-128.045	1	no
-125.089	3	no	108.085	1	2	no	-127.976	3	no
-125.036	3	no	108.148	1	1	no	-127.107	1	no
-124.962	1	no	108.986	14	0.07	no	-127.078	3	no
-124.141	1	no	109.028	4	0.25	no	-126.052	3	no
-124.056	1	no	109.055	1	2	no	-126.005	1	no
-123.027	1	no	109.086	7	0.14	no	-125.129	1	no
-122.989	2	no	109.153	1	1	no	-125.089	3	no
-122.119	1	no	109.975	3	0	no	-125.047	2	no
-121.015	1	no	110.017	6	0	no	-124.962	1	no
-120.983	1	no	110.068	9	0.11	no	-124.141	1	no
-120.034	1	no	110.094	1	2	no	-124.056	1	no
-119.99	1	no	110.126	1	1	no	-123.067	1	no
-119.146	1	no	110.156	1	0	no	-122.999	3	no
-119.017	4	no	110.998	13	0	no	-122.119	1	no
-118.984	1	no	111.053	13	0	no	-122.048	2	no
-118.011	2	no	111.099	5	0.2	no	-120.983	1	no
-117.174	2	no	111.123	1	1	no	-120.034	1	no
-117.013	8	no	111.16	1	1	no	-119.99	1	no
-116.059	2	no	111.985	27	0	no	-119.146	1	no
-116.026	21	no	112.023	4	0.25	no	-119.017	4	no
-115.987	4	no	112.082	1	0	no	-118.984	1	no
-115.944	1	no	112.152	1	0	no	-118.011	2	no
-115.049	1	no	112.987	14	0.07	no	-117.174	2	no
-115.022	19	yes	113.036	2	0	no	-117.12	2	no
-114.981	3	no	113.098	3	0	no	-117.013	8	no
-114.954	1	no	113.187	1	0	no	-116.057	3	no
-114.174	3	no	113.975	19	0	no	-116.022	16	no
-114.122	1	no	114.009	7	0.14	no	-115.987	4	no
-114.048	3	no	114.078	11	0	no	-115.944	1	no
-113.967	3	no	114.967	4	0	no	-115.116	1	no
-112.992	1	no	114.998	20	0	no	-115.055	2	no
-112.127	1	no	115.051	13	0.08	no	-115.021	17	yes
-112.056	5	no	115.09	3	0.33	no	-114.966	3	no
-111.074	3	no	115.121	1	0	no	-114.167	4	no
-111.004	1	no	115.172	1	0	no	-114.122	1	no
-110.166	1	no	115.98	11	0	no	-114.052	4	no
-110.07	5	no	116.012	4	0.5	no	-113.967	3	no
-110.032	3	no	116.054	41	0	no	-113.079	1	no
-109.135	1	no	116.104	6	0	no	-112.992	1	no
-109.09	4	no	116.979	2	0	no	-112.127	1	no
-109.045	3	no	117.033	1	2	no	-112.056	5	no
-108.092	1	no	117.073	2	0.5	no	-111.075	2	no
-108.031	1	no	117.981	18	0.06	no	-111.003	2	no
-107.958	1	no	118.012	1	1	no	-110.166	1	no
-107.167	1	no	118.055	2	0.5	no	-110.069	4	no
-107.032	1	no	118.103	3	0	no	-110.029	4	no
-106.978	1	no	118.977	9	0.11	no	-109.135	1	no
-106.152	1	no	119.008	1	0	no	-109.092	3	no
-106.033	3	no	119.045	3	0	no	-109.044	2	no
-105.941	1	no	119.972	3	0	no	-108.092	1	no
-105.174	2	no	120.006	9	0	no	-108.031	1	no
-105.01	3	no	120.043	5	0	no	-107.958	1	no
-104.108	1	no	120.143	2	0	no	-107.167	1	no
-104.05	1	no	120.974	1	0	no	-107.068	2	no
-103.982	1	no	121.013	13	0.15	no	-107.02	1	no
-103.162	2	no	121.068	3	0.33	no	-106.978	1	no
-103.064	1	no	121.118	1	1	no	-106.152	1	no
-103.017	2	no	121.18	1	1	no	-106.039	3	no
-102.984	1	no	121.972	1	0	no	-105.941	1	no
-102.952	2	no	122.008	8	0	no	-105.174	2	no
-102.081	2	no	122.062	7	0	no	-105.01	3	no
-102.037	1	no	122.136	3	0	no	-104.108	1	no
-101.966	2	no	122.981	7	0.14	no	-104.05	1	no
-101.156	1	no	123.018	7	0	no	-103.172	1	no
-101.1	1	no	123.048	1	0	no	-103.064	1	no
-101.029	4	no	123.98	12	0.08	no	-103.017	2	no
-100.999	1	no	124.017	4	0	no	-102.984	1	no
-100.158	1	no	124.052	2	0.5	no	-102.95	1	no
-100.042	14	no	124.101	1	1	no	-102.081	2	no
-99.9944	5	no	124.141	2	0	no	-102.037	1	no
-99.1651	1	no	124.981	17	0	no	-101.966	2	no
-99.1211	1	no	125.03	5	0.4	no	-101.156	1	no
-99.0345	9	no	125.053	2	0.5	no	-101.1	1	no
-98.9871	5	no	125.096	6	0.17	no	-101.029	4	no
-98.0414	2	no	125.125	1	1	no	-100.999	1	no
-97.1131	2	no	125.166	1	0	no	-100.158	1	no
-96.1741	1	no	126.01	5	0	no	-100.114	1	no
-96.0794	2	no	126.069	16	0.13	no	-100.04	11	no
-95.0925	6	no	126.139	2	0	no	-99.9944	5	no
-94.9694	1	no	126.982	3	0	no	-99.1651	1	no
-94.0668	5	no	127.028	12	0.08	no	-99.1211	1	no
-94.0301	3	no	127.08	6	0.17	no	-99.0404	6	no
-93.139	1	no	127.124	1	2	no	-99.0037	2	no
-92.1663	2	no	127.985	16	0	no	-98.9735	2	no
-92.0919	3	no	128.026	1	0	no	-98.1462	1	no
-92.0432	1	no	128.07	4	0	no	-98.0345	5	no
-92.0164	1	no	128.988	20	0	no	-97.9712	5	no
-91.9655	3	no	129.034	2	0	no	-97.1242	1	no
-91.1786	1	no	129.072	1	4	no	-97.0321	7	no
-91.0415	3	no	129.117	1	1	no	-96.9822	4	no
-90.0851	1	no	129.963	1	0	no	-96.1741	1	no
-90.0441	2	no	129.989	21	0.05	no	-96.0794	2	no
-89.9422	1	no	130.028	3	0.67	no	-95.0995	3	no
-89.1238	1	no	130.069	3	0	no	-94.9694	1	no
-89.0414	2	no	130.096	1	0	no	-94.072	4	no
-88.9947	9	no	130.977	9	0.11	no	-94.0265	2	no
-88.0522	1	no	131.068	1	0	no	-93.139	1	no
-88.0107	1	no	131.094	1	0	no	-92.1663	2	no
-87.9647	1	no	131.183	1	1	no	-92.0919	3	no
-87.0416	1	no	131.988	9	0	no	-92.0432	1	no
-86.98	4	no	132.053	23	0	no	-92.0124	2	no
-86.1876	1	no	132.11	4	0	no	-91.9655	3	no
-86.0868	3	no	132.149	1	0	no	-91.1786	1	no
-85.977	3	no	133.053	6	0	no	-91.0609	1	no
-85.0595	2	no	133.091	2	0	no	-91.0243	2	no
-85.0218	5	no	133.157	1	0	no	-90.0441	2	no
-84.0489	12	no	133.98	10	0.1	no	-89.9422	1	no
-83.9502	1	no	134.013	5	0.2	no	-89.1238	1	no
-83.1851	1	no	134.044	1	1	no	-89.0408	3	no
-83.1303	2	no	134.084	6	0	no	-88.9961	8	no
-83.0504	1	no	134.984	8	0	no	-88.0522	1	no
-83.0254	7	no	135.046	5	0	no	-88.0107	1	no
-82.9706	2	no	135.084	1	1	no	-87.9647	1	no
-82.1373	3	no	135.11	1	1	no	-87.0346	2	no
-82.0476	2	no	135.145	1	0	no	-86.98	4	no
-81.0702	1	no	136	16	0	no	-86.1876	1	no
-81.0148	1	no	136.035	5	0	no	-86.0868	3	no
-80.9415	1	no	136.069	1	0	no	-85.9761	2	no
-80.086	2	no	136.16	1	0	no	-85.0595	2	no
-80.0571	1	no	137.007	8	0.13	no	-85.0207	4	no
-79.1004	5	no	137.049	2	0	no	-84.0488	11	no
-79.0277	1	no	137.077	1	0	no	-83.9502	1	no
-79.0014	1	no	137.13	2	0	no	-83.1851	1	no
-78.167	2	no	137.171	2	0	no	-83.1303	2	no
-78.0934	2	no	137.988	4	0	no	-83.099	1	no
-77.0121	1	no	138.038	2	0	no	-83.0504	1	no
-76.9861	1	no	138.077	7	0	no	-83.0241	6	no
-76.115	1	no	138.111	2	0	no	-82.9706	2	no
-76.093	4	no	138.176	1	0	no	-82.1373	3	no
-76.0567	1	no	138.972	9	0.11	no	-82.0459	5	no
-75.9752	2	no	139.029	10	0	no	-81.9931	1	no
-75.1865	1	no	139.06	2	0	no	-81.0509	1	no
-75.1127	4	no	139.122	1	2	no	-81.0119	2	no
-75.0775	1	no	139.976	8	0	no	-80.9415	1	no
-75.0388	1	no	140.021	1	0	no	-80.086	2	no
-75.0034	1	no	140.053	3	0.33	no	-80.0571	1	no
-74.1534	1	no	140.104	4	0	no	-79.1027	4	no
-74.0442	4	no	140.154	6	0	no	-79.0277	1	no
-73.9822	2	no	140.994	14	0.14	no	-79.0014	1	no
-73.0961	1	no	141.043	6	0	no	-78.167	2	no
-73.0702	1	no	141.089	8	0.13	no	-78.0934	2	no
-73.0207	2	no	141.134	2	0.5	no	-78.0135	1	no
-72.9835	2	no	141.967	2	0	no	-77.0831	1	no
-72.1525	2	no	142.011	6	0	no	-77.0121	1	no
-71.1219	1	no	142.066	4	0.25	no	-76.9861	1	no
-70.9733	4	no	142.103	11	0.09	no	-76.115	1	no
-70.9404	1	no	142.141	1	0	no	-76.0911	4	no
-70.1665	1	no	142.175	1	0	no	-76.0567	1	no
-70.1042	4	no	142.971	2	0	no	-75.9752	2	no
-70.0436	1	no	142.999	8	0	no	-75.1865	1	no
-69.9568	3	no	143.043	5	0	no	-75.1127	4	no
-69.1576	5	no	143.103	2	1	no	-75.0034	1	no
-69.043	1	no	143.142	1	1	no	-74.1534	1	no
-69.0092	1	no	143.962	1	0	no	-74.0458	3	no
-68.1813	2	no	143.994	9	0	no	-73.9822	2	no
-68.0914	2	no	144.039	2	0	no	-73.0961	1	no
-68.0485	7	no	144.077	1	1	no	-73.0702	1	no
-67.0696	6	no	144.985	20	0	no	-73.0285	3	no
-67.0204	6	no	145.041	3	0	no	-72.9792	1	no
-66.9909	1	no	145.133	3	0	no	-72.1525	2	no
-66.0715	1	no	146.008	6	0	no	-72.0293	1	no
-66.016	1	no	146.045	1	0	no	-71.11	2	no
-65.9727	1	no	146.072	3	0	no	-70.9694	6	no
-65.0983	2	no	146.12	1	1	no	-70.9404	1	no
-64.0967	2	no	146.962	1	0	no	-70.1042	4	no
-63.0957	1	no	146.986	4	0	no	-70.0436	1	no
-63.0068	2	no	147.073	4	0.25	no	-69.994	1	no
-62.9455	2	no	147.116	1	1	no	-69.9568	3	no
-62.1362	1	no	147.181	1	1	no	-69.1576	5	no
-62.053	2	no	147.98	8	0.25	no	-69.0092	1	no
-61.9978	2	no	148.011	1	1	no	-68.1813	2	no
-61.1425	1	no	148.045	10	0	no	-68.0914	2	no
-61.0555	1	no	148.097	4	0	no	-68.0485	7	no
-60.9594	1	no	148.973	3	0.33	no	-67.0673	4	no
-60.0899	1	no	149.024	5	0.2	no	-67.0209	6	no
-60.0338	2	no	149.083	3	0	no	-66.9909	1	no
-59.0927	1	no	149.111	1	0	no	-66.0655	3	no
-59.0523	1	no	149.975	4	0	no	-65.9952	3	no
-59.0263	1	no	150.017	1	1	no	-65.0947	1	no
-58.0152	4	no	150.065	5	0.6	no	-65.0127	1	no
-57.9707	2	no	150.098	1	1	no	-64.0934	1	no
-57.1736	1	no	150.13	1	0	no	-63.0957	1	no
-57.042	1	no	150.979	6	0	no	-63.0068	2	no
-57.0003	10	no	151.03	5	0	no	-62.9455	2	no
-56.9666	1	no	151.099	3	0.33	no	-62.1362	1	no
-56.1043	1	no	151.997	10	0	no	-62.053	2	no
-55.9904	3	no	152.032	2	0	no	-61.9978	2	no
-55.1673	1	no	152.057	1	0	no	-61.1425	1	no
-55.0013	2	no	152.133	2	0	no	-61.0933	1	no
-54.1341	3	no	153.009	3	0.33	no	-61.0446	2	no
-54.0604	3	no	153.065	3	0.33	no	-60.9594	1	no
-53.971	2	no	153.104	1	0	no	-60.0899	1	no
-53.1727	1	no	153.985	6	0.17	no	-60.039	3	no
-53.0752	1	no	154.015	2	0	no	-59.0263	1	no
-53.0306	1	no	154.052	6	0.17	no	-58.0803	1	no
-52.0882	1	no	154.093	3	0	no	-58.0302	1	no
-52.0506	6	no	154.12	2	0	no	-57.9813	3	no
-51.947	1	no	154.16	1	0	no	-57.1736	1	no
-51.1609	1	no	154.978	15	0	no	-57.0469	2	no
-51.135	1	no	155.02	5	0	no	-56.9993	7	no
-51.0864	5	no	155.045	1	0	no	-56.1008	2	no
-51.0344	1	no	155.097	1	1	no	-55.9904	3	no
-50.944	1	no	155.165	1	1	no	-55.1673	1	no
-50.1494	1	no	155.988	8	0.13	no	-55.107	1	no
-50.0909	12	no	156.061	5	0	no	-55.0013	2	no
-50.0551	1	no	156.108	4	0	no	-54.1341	3	no
-50.0111	4	no	156.139	1	0	no	-53.971	2	no
-49.0705	1	no	156.987	10	0	no	-53.1727	1	no
-49.0353	1	no	157.013	1	0	no	-53.0752	1	no
-48.9787	2	no	157.044	2	0.5	no	-52.0882	1	no
-48.0862	1	no	157.079	8	0.13	no	-52.0506	6	no
-47.9964	2	no	157.174	1	3	no	-51.9912	1	no
-46.9764	3	no	157.986	2	0.5	no	-51.947	1	no
-46.1467	2	no	158.024	2	0.5	no	-51.1609	1	no
-46.0561	1	no	158.051	4	0	no	-51.0864	5	no
-45.9816	3	no	158.102	10	0	no	-51.0296	2	no
-45.9422	1	no	158.975	1	0	no	-50.944	1	no
-45.1545	1	no	159.01	6	0	no	-50.1494	1	no
-44.9769	1	no	159.036	1	0	no	-50.0892	10	no
-44.0657	1	no	159.103	5	0.4	no	-50.0551	1	no
-44.0204	4	no	159.15	2	0	no	-50.0121	5	no
-43.0506	1	no	159.993	15	0	no	-49.0705	1	no
-43.0231	6	no	160.043	2	0	no	-49.0353	1	no
-42.9563	3	no	160.14	1	2	no	-48.9787	2	no
-42.0873	1	no	160.987	6	0	no	-48.0862	1	no
-42.007	4	no	161.029	5	0	no	-47.9964	2	no
-41.9664	1	no	161.077	1	2	no	-46.9764	3	no
-41.1016	3	no	161.141	1	0	no	-46.1467	2	no
-41.0079	6	no	161.185	1	1	no	-46.0561	1	no
-40.0303	1	no	161.968	1	0	no	-45.9816	3	no
-39.9997	1	no	162.02	9	0.22	no	-45.9422	1	no
-39.0554	1	no	162.068	1	0	no	-45.1545	1	no
-39.0123	2	no	162.1	1	1	no	-44.9769	1	no
-38.1363	2	no	162.156	1	1	no	-44.0657	1	no
-38.0756	3	no	162.965	2	1.5	no	-44.0172	3	no
-38.0314	2	no	162.996	4	0.75	no	-43.0356	3	no
-37.9754	2	no	163.045	4	0	no	-42.9563	3	no
-37.1613	2	no	163.132	1	1	no	-42.0898	3	no
-37.1197	1	no	163.175	1	4	no	-42.0045	3	no
-37.0487	1	no	163.976	13	0	no	-41.9664	1	no
-37.0164	2	no	164.034	4	0	no	-41.0986	4	no
-36.0794	2	no	164.076	6	0.33	no	-41.0511	1	no
-35.1525	2	no	164.104	1	2	no	-41.0105	5	no
-35.0453	3	no	164.975	2	0	no	-40.041	2	no
-34.9494	1	no	165.024	4	0	no	-39.9997	1	no
-34.1152	2	no	165.072	4	0	no	-39.1089	1	no
-34.0718	8	no	165.133	1	0	no	-39.0554	1	no
-34.0326	2	no	165.99	4	0	no	-39.0076	3	no
-33.0608	12	no	166.049	2	0	no	-38.1363	2	no
-33.0222	4	no	166.961	1	0	no	-38.0845	1	no
[truncated: 1,018 more rows]

## Sheet: T S-5
SI Table S-5	Selected ET and EE Mass Differences with FDR Test Results
[truncated: 38 more rows]

[truncated: 7 more sheets: T S-6, T S-7, T S-8, T S-9, T S-10, T S-11, T S-12]
